# Supplementary material for: Et3SiH + KOtBu provide multiple reactive intermediates that compete in the reactions and rearrangements of benzylnitriles and indolenines
Source: Royal Society of Chemistry journal article supplement (doi:10.1039/d0sc04244g), 2020-01-01
Supplement: d0sc04244g1.pdf [file d0sc04244g1.pdf]

Supplementary information for:

**Et<sub>3</sub>SiH + KO<sup>t</sup>Bu Provide Multiple Reactive Intermediates that Compete in the  
Reactions and Rearrangements of Benzylnitriles and Indolenines**

Andrew J. Smith, Daniela Dimitrova, Jude N. Arokianathar, Kenneth F. Clark, Darren L. Poole, Stuart  
G. Leach and John A. Murphy

## General Information

### Experimental Details

All solvents and reagents were used as received without any further purification. Anhydrous hexane,  $\text{CH}_2\text{Cl}_2$ ,  $\text{Et}_2\text{O}$ , THF and toluene were obtained from Pure-Solv 400 solvent purification system (by Innovative Technology Inc., USA). DMF and DMSO were dried over 3 Å pre-activated molecular sieves. Molecular sieves were activated by three heating cycles in the microwave, followed by evacuation under vacuum. Powder NaH was obtained by washing a mixture of 60% NaH dispersed in mineral oil three times with anhydrous hexane under argon, followed by drying of the powder under high vacuum.

IR spectra were recorded on Shimadzu 1 IRAffinity-1 instrument.

NMR data were recorded on Bruker instruments operating at 400 MHz or 500 MHz for  $^1\text{H}$  and 101 or 126 MHz for  $^{13}\text{C}$  NMR experiments. All chemical shifts are recorded in parts per million (ppm) and coupling constants are measured in Hertz (Hz). Peak multiplicity is abbreviated as follows: s (singlet), d (doublet), t (triplet), q (quartet), sxt (sextet), hept (heptet), m (multiple) and br s (broad singlet). All spectra were referenced with respect to  $\text{CHCl}_3$  peak at 7.26 ppm for  $^1\text{H}$  and with respect to  $\text{CDCl}_3$  peak at 77.16 ppm for  $^{13}\text{C}$ .

High resolution mass spectrometry analysis was carried out at the National Mass Spectrometry Centre on LTQ Orbital instrument and at the University of Glasgow.

LC-MS data were recorded on Agilent Technologies 1200 series instrument utilising APCI coupled with ESI with UV detection at 254 nm. All samples were prepared in MeOH or MeCN.

GC-MS data were recorded on Thermo Finnigan Polaris Q, mass range 50-650 Da. The column temperature was 320 °C, and the carrier gas was helium with a flow rate of 1 mL/min. The adsorbent was Crossbond® (0.25  $\mu\text{m}$ ) with column dimensions of 30 m x 0.25 mm. Results are reported as  $m/z$ . All samples were prepared in  $\text{CHCl}_3$  and electron ionisation (EI) was used as the ionisation method.

## General Procedures:

### General Procedure A:

Substrate (1.0 eq., 0.5 mmol), Et<sub>3</sub>SiH (3.0 eq., 1.5 mmol, 240  $\mu$ L) and KO<sup>t</sup>Bu (3.0 eq., 1.5 mmol, 168.32 mg) were sealed in a pressure tube in a nitrogen-filled glovebox. The contents of the pressure tube were stirred at 130 °C for 18 h before the pressure tube was cooled to room temperature, opened to air and diluted with water (50 mL). The organic products were extracted into Et<sub>2</sub>O (3 x 50 mL). The combined organic phases were dried over Na<sub>2</sub>SO<sub>4</sub>, filtered and concentrated. Column chromatography was utilised as a purification method for the respective product(s) of the reaction.

### General Procedure B:

Substrate (1.0 eq., 0.5 mmol) and KO<sup>t</sup>Bu (3.0 eq., 1.5 mmol, 168.32 mg) were sealed in a pressure tube in a nitrogen-filled glovebox. The contents of the pressure tube were stirred at 130 °C for 18 h before the pressure tube was cooled to room temperature, opened to air and diluted with water (50 mL). The organic products were extracted into Et<sub>2</sub>O (3 x 50 mL). The combined organic phases were dried over Na<sub>2</sub>SO<sub>4</sub>, filtered and concentrated. Column chromatography was utilised as a purification method for the respective product(s) of the reaction.

### General Procedure C:

3,3-Dimethyl-2-phenyl-3*H*-indole (1.0 eq., 0.5 mmol, 110.65 mg) and RMgX (2.0 eq., 1 mmol, 1 mL or 500  $\mu$ L) as a 1 M or 2 M solution in THF was added to a pressure tube in a nitrogen-filled glovebox. The total volume of solvent was made up to 1.5 mL of dry THF and the pressure tube was sealed and heated to 130 °C for 18 h. The reaction mixture was then cooled to room temperature, quenched with water (30 mL) at 0 °C and extracted with Et<sub>2</sub>O (3 x 50 mL). The combined organic layers were dried over Na<sub>2</sub>SO<sub>4</sub>, filtered and concentrated.

### General Procedure D:

A solution of an appropriate ketone (1.0 eq., 10 mmol or 7 mmol), phenylhydrazine (1.0 eq., 10 mmol or 7 mmol) and AcOH (10 mL) was refluxed under argon for 16 h. The reaction mixture was cooled to room temperature, poured onto sat. Na<sub>2</sub>CO<sub>3</sub> (100 mL) and extracted with CH<sub>2</sub>Cl<sub>2</sub> (4 x 40 mL). The combined organic layers were dried over MgSO<sub>4</sub>, filtered and concentrated. Purification by column chromatography afforded the corresponding indolenine product.<sup>1</sup>

### General Procedure E:

*i*PrMgCl (3.0 eq., 30 mmol, 15 mL) as a 2 M solution in THF was added dropwise to a solution of an appropriate benzonitrile (1.0 eq., 10 mmol) in dry THF (10 mL) at 0 °C. CuBr (1 mol%, 0.1 mmol, 14.35 mg) was added under argon and the reaction mixture was refluxed for 4 h before it was cooled to

0 °C and quenched by dropwise addition of water (11 mL). The reaction was then diluted with 1 M H<sub>2</sub>SO<sub>4</sub> (36 mL) and the resulting yellow/green mixture was refluxed for 1 h before it was cooled to 0 °C and basified with 2 M NaOH until pH = 9 – 10. The reaction mixture was then extracted with EtOAc (3 x 100 mL) and the combined organic phases were dried over MgSO<sub>4</sub>, filtered and concentrated. The respective ketone product was used without any further purification.<sup>2</sup>

## Substrate synthesis:

### Preparation of 2-phenyl-2-propylpentanenitrile (**18**)

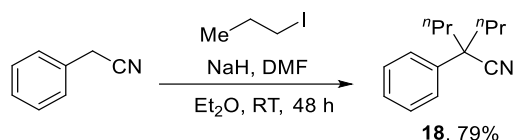

This substrate was prepared according to a modified literature procedure.<sup>3</sup> To a suspension of NaH (227 mg, 9.45 mmol, 3.15 equiv.) in dry DMF (11 mL) was added a solution of benzyl cyanide (0.35 mL, 3 mmol, 1 equiv.) and 1-iodopropane (1.32 mL, 13.5 mmol, 4.5 equiv.) in dry diethyl ether (5.5 mL) at room temperature. This mixture was stirred for 48 h at room temperature and was then quenched with methanol and concentrated under reduced pressure. The crude residue was redissolved in dry diethyl ether, and then washed with water, sodium bisulfite solution and sodium carbonate solution. The organic layer was then dried over Na<sub>2</sub>SO<sub>4</sub>, filtered and concentrated. Purification by column chromatography (hexane:diethyl ether, 49:1) afforded 2-phenyl-2-propylpentanenitrile **18** as a colourless oil (476 mg, 79%). **<sup>1</sup>H NMR** (400 MHz, CDCl<sub>3</sub>) 0.89 (t, *J* = 7.5 Hz, 6 H, 2 x CH<sub>3</sub>), 1.05 - 1.24 (m, 2 H, 2 x CH), 1.40 - 1.58 (m, 2 H, 2 x CH), 1.81-1.89 (ddd, *J* = 13.6, 12.3, 4.8 Hz, 2 H, 2 x CH), 1.92-2.00 (ddd, *J* = 13.3, 12.0, 4.5 Hz, 2 H, 2 x CH), 7.25 - 7.34 (m, 1 H, ArH), 7.35 - 7.44 (m, 4 H, 4 x ArH). **<sup>13</sup>C NMR** (101 MHz, CDCl<sub>3</sub>) 13.9, 18.6, 43.2, 48.3, 122.7, 125.9, 127.5, 128.8, 138.8. **ATR-IR**  $\nu_{\text{max}}$  (neat)/cm<sup>-1</sup> 2958, 2872, 2233, 1600, 1492, 1463, 1448, 1379, 1201, 1112, 1083, 1029, 912, 763, 738, 698. ***m/z* (EI)**: 201.2 (M<sup>+</sup>, 25), 159.1 (77), 130.1 (78), 116.1 (100), 103.1 (48), 91.1 (14), 77.1 (16). **HRMS (CI)**: calcd. for C<sub>14</sub>H<sub>20</sub>N<sup>+</sup> ([M+H]<sup>+</sup>): 202.1596, found: 202.1594.

### Preparation of 2-(2-methoxyphenyl)-2-propylpentanenitrile (**23**)

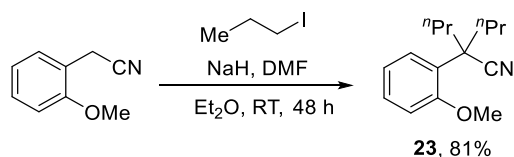

This substrate was prepared according to a modified literature procedure.<sup>3</sup> To a suspension of NaH (227 mg, 9.45 mmol, 3.15 equiv.) in dry DMF (11 mL) was added a solution 2-methoxyphenylacetonitrile (442 mg, 3 mmol, 1 equiv.) and 1-iodopropane (1.32 mL, 13.5 mmol, 4.5 equiv.) in dry diethyl ether (5.5 mL) at room temperature. This mixture was stirred for 48 h at room temperature and was then quenched with methanol and concentrated under reduced pressure. The crude residue was redissolved



in diethyl ether, and then washed with water, sodium bisulfite solution and sodium carbonate solution. The organic layer was then dried over Na<sub>2</sub>SO<sub>4</sub>, filtered and concentrated. Purification by column chromatography (hexane:diethyl ether, 49:1) afforded 2-(2-methoxyphenyl)-2-propylpentanenitrile **23** as a colourless oil (559 mg, 81%). **<sup>1</sup>H NMR** (400 MHz, CDCl<sub>3</sub>) 0.89 (t, *J* = 7.3 Hz, 6 H, 2 x CH<sub>3</sub>), 1.02 - 1.22 (m, 2 H, 2 x CH), 1.38 - 1.51 (m, 2 H, 2 x CH), 1.91 (ddd, *J* = 13.5, 12.0, 4.9 Hz, 2 H, 2 x CH), 2.27 (ddd, *J* = 13.5, 12.2, 4.7 Hz, 2 H, 2 x CH), 3.85 (s, 3 H, OCH<sub>3</sub>), 6.91 (dd, *J* = 8.3, 1.0 Hz, 1 H, ArH), 6.96 (td, *J* = 7.6, 1.5 Hz, 1 H, ArH), 7.25 - 7.33 (m, 1 H, ArH), 7.52 (dd, *J* = 7.8, 1.5 Hz, 1 H, ArH). **<sup>13</sup>C NMR** (101 MHz, CDCl<sub>3</sub>) 14.0, 19.0, 39.7, 48.4, 55.3, 111.8, 120.7, 123.7, 125.6, 129.0, 129.5, 157.0. **ATR-IR**  $\nu_{\text{max}}$  (neat)/cm<sup>-1</sup> 2958, 2931, 2872, 2231, 1583, 1492, 1463, 1435, 1242, 1097, 1024, 788. ***m/z* (EI)**: 231.2 (M<sup>+</sup>, 34), 188.1 (100), 161.1 (85), 146.1 (63), 131.1 (9), 116.1 (16), 105.1 (9), 91.1 (22), 77.1 (9), 65.1 (3), 51.0 (3). **HRMS (CI)** calcd. for C<sub>15</sub>H<sub>22</sub>NO<sup>+</sup> ([M+H]<sup>+</sup>): 232.1696, found: 232.1696.

#### Preparation of 2-(2-fluorophenyl)-2-propylpentanenitrile (**32**)

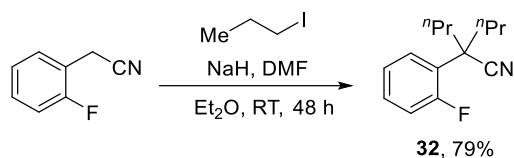

This substrate was prepared according to a modified literature procedure.<sup>3</sup> To a solution of sodium hydride (60% dispersion in mineral oil, 630 mg, 15.75 mmol, 3.15 equiv.) in dry DMF (15 mL), under nitrogen, was added a mixture of 2-(2-fluorophenyl)acetonitrile (676 mg, 5 mmol, 1 equiv.) and 1-iodopropane (2.19 mL, 22.5 mmol, 4.5 equiv.) in dry diethyl ether (7.5 mL) at room temperature. The resulting mixture was stirred for 48 h at room temperature and then quenched by slow addition of methanol. The resulting mixture was concentrated under reduced pressure, redissolved in diethyl ether and washed with water, sodium bisulfite solution and sodium carbonate solution. The organic layer was then dried over a hydrophobic frit and concentrated under reduced pressure. Purification by column chromatography (cyclohexane:ethyl acetate, 100:0 → 95:5) afforded 2-(2-fluorophenyl)-2-propylpentanenitrile **32** as a colourless oil (866 mg, 79%). **<sup>1</sup>H NMR** (400 MHz, CDCl<sub>3</sub>) 0.91 (t, *J* = 7.1 Hz, 6 H, 2 x CH<sub>3</sub>), 1.05 - 1.23 (m, 2 H, 2 x CH), 1.41 - 1.59 (m, 2 H, 2 x CH), 1.96 (td, *J* = 12.8, 4.9 Hz, 2 H, 2 x CH), 2.07 - 2.21 (m, 2 H, 2 x CH), 7.05 (ddd, *J* = 12.8, 8.4, 1.5 Hz, 1 H, ArH), 7.16 (td, *J* = 7.5, 1.5 Hz, 1 H, ArH), 7.27 - 7.35 (m, 1 H, ArH), 7.59 (td, *J* = 8.0, 1.7 Hz, 1 H, ArH). **<sup>13</sup>C NMR** (101 MHz, CDCl<sub>3</sub>) 13.8 (s), 19.0 (s), 40.7 (d, *J* = 3.9 Hz), 48.0 (d, *J* = 3.9 Hz), 116.6 (d, *J* = 23.1 Hz), 122.3 (s), 124.3 (d, *J* = 3.1 Hz), 125.1 (d, *J* = 10.8 Hz), 129.7 (d, *J* = 9.3 Hz), 130.0 (d, *J* = 4.6 Hz), 160.0 (d, *J* = 248.1 Hz). **ATR-IR**  $\nu_{\text{max}}$  (neat)/cm<sup>-1</sup> 2963, 2934, 2875, 2233, 1578, 1491, 1446, 1222, 1091, 805, 757, 545, 484. ***m/z* (EI)**: 219.2 (M<sup>+</sup>, 19), 190.1 (7), 177.1 (75), 148.1 (100), 134.1 (55), 121.1 (43), 110.0 (14), 101.1 (14), 75.1 (6). **HRMS (CI)** calcd. for C<sub>14</sub>H<sub>19</sub>FN<sup>+</sup> ([M+H]<sup>+</sup>): 220.1502, found: 220.1507.

### Preparation of 2-(2-chlorophenyl)-2-propylpentanenitrile (**33**)

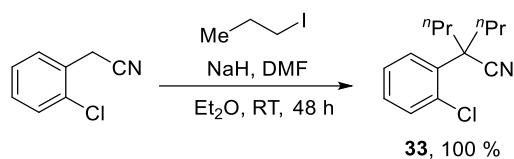

This substrate was prepared according to a modified literature procedure.<sup>3</sup> To a solution of sodium hydride (60% dispersion in mineral oil, 630 mg, 15.75 mmol, 3.15 equiv.) in dry DMF (15 mL), under nitrogen, was added a mixture of 2-(2-chlorophenyl)acetonitrile (758 mg, 5 mmol, 1 equiv.) and 1-iodopropane (2.19 mL, 22.5 mmol, 4.5 equiv.) in dry diethyl ether (7.5 mL) at room temperature. The resulting mixture was stirred for 48 h at room temperature and then quenched by slow addition of methanol. The resulting mixture was concentrated under reduced pressure, redissolved in diethyl ether and washed with water, sodium bisulfite solution and sodium carbonate solution. The organic layer was then dried over a hydrophobic frit and concentrated under reduced pressure. Purification by column chromatography 247 (cyclohexane:ethyl acetate, 100:0 → 95:5) afforded 2-(2-chlorophenyl)-2-propylpentanenitrile **33** as a colourless oil (1.18 g, 100%). <sup>1</sup>H NMR (400 MHz, CDCl<sub>3</sub>) 0.92 (t, *J* = 7.5 Hz, 6 H, 2 x CH<sub>3</sub>), 1.04 - 1.24 (m, 2 H, 2 x CH), 1.37 - 1.55 (m, 2 H, 2 x CH), 1.99 (ddd, *J* = 13.9, 12.1, 4.6 Hz, 2 H, 2 x CH), 2.51 (ddd, *J* = 13.9, 12.3, 4.6 Hz, 2 H, 2 x CH), 7.23 - 7.32 (m, 2 H, 2 x ArH), 7.35 - 7.41 (m, 1 H, ArH), 7.68 - 7.73 (m, 1 H, ArH). <sup>13</sup>C NMR (101 MHz, CDCl<sub>3</sub>) 13.9, 19.0, 39.4, 50.3, 123.0, 127.1, 129.1, 131.1, 131.8, 132.2, 134.1. ATR-IR  $\nu_{\text{max}}$  (neat)/cm<sup>-1</sup> 2961, 2933, 2874, 22334, 1569, 1467, 1430, 1120, 1039, 758, 466. *m/z* (EI): 237.1 (M<sup>+</sup>, 7), 235.1 (M<sup>+</sup>, 21), 208.1 (3), 206.1 (9), 195.1 (22), 193.1 (69), 166.0 (38), 164.1 (100), 152.0 (17), 150.0 (48), 139.0 (13), 137.0 (36), 128.1 (21), 115.1 (12), 101.1 (16), 89.1 (6), 77.1 (9), 63.1 (4), 51.1 (6). HRMS (CI) calcd. for C<sub>14</sub>H<sub>19</sub>ClN<sup>+</sup> ([M+H]<sup>+</sup>): 236.1206 and 238.1180, found: 236.1211 and 238.1184.

### Preparation of 2-(2-bromophenyl)-2-propylpentanenitrile (**34**)

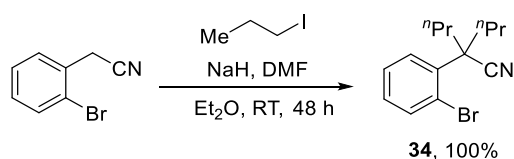

This substrate was prepared according to a modified literature procedure.<sup>3</sup> To a solution of sodium hydride (60% dispersion in mineral oil, 630 mg, 15.75 mmol, 3.15 equiv.) in dry DMF (15 mL), under nitrogen, was added a mixture of 2-(2-bromophenyl)acetonitrile (0.65 mL, 5 mmol, 1 equiv.) and 1-iodopropane (2.19 mL, 22.5 mmol, 4.5 equiv.) in dry diethyl ether (7.5 mL) at room temperature. The resulting mixture was stirred for 48 h at room temperature and then quenched by slow addition of methanol. The resulting mixture was concentrated under reduced pressure, redissolved in diethyl ether and washed with water, sodium bisulfite solution and sodium carbonate solution. The organic layer was then dried over a hydrophobic frit and concentrated under reduced pressure. Purification by column chromatography (cyclohexane:ethyl acetate, 100:0 → 95:5) afforded 2-(2-bromophenyl)-2-propyl

pentanenitrile **34** as a colourless oil (1.18 g, 100%). **<sup>1</sup>H NMR** (400 MHz, CDCl<sub>3</sub>) 0.92 (t, *J* = 7.3 Hz, 6 H, 2 x CH<sub>3</sub>), 1.04 - 1.22 (m, 2 H, 2 x CH), 1.35 - 1.54 (m, 2 H, 2 x CH) 1.97 (ddd, *J* = 14.1, 12.2, 4.6 Hz, 2 H, 2 x CH), 2.61 (ddd, *J* = 13.9, 12.3, 4.6 Hz, 2 H, 2 x CH), 7.17 (m, 1 H, ArH), 7.33 (td, *J* = 7.4, 1.5 Hz, 1 H, ArH), 7.61 (dd, *J* = 7.9, 1.5 Hz, 1 H, ArH), 7.72 (dd, *J* = 8.1, 1.7 Hz, 1 H, ArH). **<sup>13</sup>C NMR** (101 MHz, CDCl<sub>3</sub>) 13.9, 19.0, 39.3, 50.9, 120.3, 123.0, 127.6, 129.3, 131.6, 135.4, 135.9. **ATR-IR**  $\nu_{\text{max}}$  (neat)/cm<sup>-1</sup> 2960, 2932, 2873, 2233, 1565, 1469, 1426, 1020, 757, 661, 532, 459. ***m/z* (EI)**: 281.1 (M<sup>+</sup>, 23), 279.1 (M<sup>+</sup>, 23), 252.0 (9), 250.1 (10), 239.1 (70), 237.1 (74), 210.0 (98), 208.0 (100), 195.9 (45), 194.0 (47), 183.0 (30), 181.0 (31), 169.0 (8), 158.1 (12), 140.1 (9), 129.1 (33), 115.1 (37), 102.1 (32), 89.0 (13), 77.1 (20), 63.1 (9), 51.1 (15). **HRMS (CI)** calcd. for C<sub>14</sub>H<sub>19</sub>BrN<sup>+</sup> ([M+H]<sup>+</sup>): 280.0701 and 282.0681, found: 280.0703 and 282.0684.

#### Preparation of 2-(2-iodophenyl)-2-propylpentanenitrile (**35**)

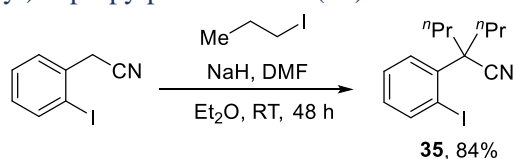

This substrate was prepared according to a modified literature procedure.<sup>3</sup> To a solution of sodium hydride (60% dispersion in mineral oil, 630 mg, 15.75 mmol, 3.15 equiv.) in dry DMF (15 mL), under nitrogen, was added a mixture of 2-(2-iodophenyl)acetonitrile (0.69 mL, 5 mmol, 1 equiv.) and 1-iodopropane (2.19 mL, 22.5 mmol, 4.5 equiv.) in dry diethyl ether (7.5 mL) at room temperature. The resulting mixture was stirred for 48 h at room temperature and then quenched by slow addition of methanol. The resulting mixture was concentrated under reduced pressure, redissolved in diethyl ether and washed with water, sodium bisulfite solution and sodium carbonate solution. The organic layer was then dried over a hydrophobic frit and concentrated under reduced pressure. Purification by column chromatography (cyclohexane:ethyl acetate, 100:0 → 95:5) afforded 2-(2-iodophenyl)-2-propylpentanenitrile **35** as a white solid (1.38 g, 84%). **mp** = 79-81 °C (lit. mp = 71-73 °C).<sup>4</sup> **<sup>1</sup>H NMR** (400 MHz, CDCl<sub>3</sub>) 0.93 (t, *J* = 7.4 Hz, 6 H, 2 x CH<sub>3</sub>), 1.04 - 1.23 (m, 2 H, 2 x CH), 1.35 - 1.53 (m, 2 H, 2 x CH), 1.92 (ddd, *J* = 14.2, 12.2, 4.7 Hz, 2 H, 2 x CH), 2.70 (ddd, *J* = 14.0, 12.3, 4.7 Hz, 2 H, 2 x CH), 6.97 (td, *J* = 7.5, 1.7 Hz, 1 H, ArH), 7.36 (td, *J* = 7.6, 1.0 Hz, 1 H, ArH), 7.68 (dd, *J* = 8.1, 1.7 Hz, 1 H, ArH), 8.00 (dd, *J* = 7.9, 1.5 Hz, 1 H, ArH). **<sup>13</sup>C NMR** (101 MHz, CDCl<sub>3</sub>) 13.9, 18.9, 39.2, 51.3, 92.1, 123.1, 128.2, 129.3, 131.6, 137.7, 143.7. **ATR-IR**  $\nu_{\text{max}}$  (neat)/cm<sup>-1</sup> 2952, 2926, 2870, 2228, 1463, 1423, 1377, 1279, 1170, 1105, 1008, 764, 731, 719, 652, 528, 454. ***m/z* (EI)**: 327.1 (M<sup>+</sup>, 48), 298.1 (8), 285.1 (64), 256.0 (100), 241.9 (42), 228.9 (31), 214.9 (5), 200.2 (4), 157.1 (20), 142.1 (13), 129.1 (39), 115.1 (42), 102.1 (25), 77.0 (16), 63.1 (8), 51.0 (11). **HRMS (CI)** calcd. for C<sub>14</sub>H<sub>19</sub>IN<sup>+</sup> ([M+H]<sup>+</sup>): 328.0562, found: 328.0559. The data for this compound are consistent with those previously reported in the literature.<sup>4</sup>

### Preparation of 2-(2-(benzyloxy)phenyl)-2-propylpentanenitrile (**36**)

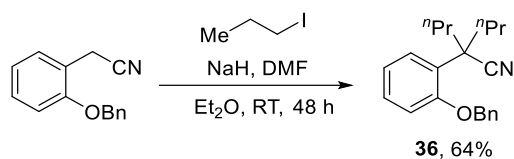

This substrate was prepared according to a modified literature procedure.<sup>3</sup> To a solution of sodium hydride (60% dispersion in mineral oil, 630 mg, 15.75 mmol, 3.15 equiv.) in dry DMF (15 mL), under nitrogen, was added a mixture of 2-(2-benzyloxy)phenylacetonitrile (1.12 g, 5 mmol, 1 equiv.) and 1-iodopropane (2.19 mL, 22.5 mmol, 4.5 equiv.) in dry diethyl ether (7.5 mL) at room temperature. The resulting mixture was stirred for 48 h at room temperature and then quenched by slow addition of methanol. The resulting mixture was concentrated under reduced pressure, redissolved in diethyl ether and washed with water, sodium bisulfite solution and sodium carbonate solution. The organic layer was then dried over a hydrophobic frit and concentrated under reduced pressure. Purification by column chromatography (cyclohexane:ethyl acetate, 100:0 → 9:1) afforded 2-(2-(benzyloxy)phenyl)-2-propylpentanenitrile **36** as a white solid (979 mg, 64%). **Mp** = 94-97 °C. **<sup>1</sup>H NMR** (400 MHz, CDCl<sub>3</sub>) 0.90 (t, *J* = 7.4 Hz, 6 H, 2 x CH<sub>3</sub>), 1.11 - 1.26 (m, 2 H, 2 x CH), 1.40 - 1.57 (m, 2 H, 2 x CH), 1.93 (ddd, *J* = 12.3, 4.4, 1.0 Hz, 2 H, 2 x CH), 2.36 (ddd, *J* = 12.3, 5.0, 1.0 Hz, 2 H, 2 x CH), 5.14 (s, 2 H, CH<sub>2</sub>), 6.96 - 7.06 (m, 2 H, 2 x ArH), 7.27 - 7.34 (m, 1 H, ArH), 7.37 - 7.43 (m, 1 H, ArH), 7.43 - 7.48 (m, 4 H, 4 x ArH), 7.61 (dd, *J* = 7.9, 1.5 Hz, 1 H, ArH). **<sup>13</sup>C NMR** (101 MHz, CDCl<sub>3</sub>) 13.9, 19.0, 39.7, 48.6, 70.4, 112.6, 120.8, 123.6, 125.5, 127.5, 128.1, 128.6, 128.9, 129.8, 136.5, 156.0. **ATR-IR**  $\nu_{\text{max}}$  (neat)/cm<sup>-1</sup> 2956, 2870, 2233, 1596, 1489, 1445, 1268, 1220, 1097, 1019, 787, 756, 737, 491. **HRMS (CI)** calcd. for C<sub>21</sub>H<sub>26</sub>NO<sup>+</sup> ([M+H]<sup>+</sup>): 308.2014, found: 308.2014.

### Preparation of 1-(2-methoxyphenyl)cyclopentane-1-carbonitrile (**51**)

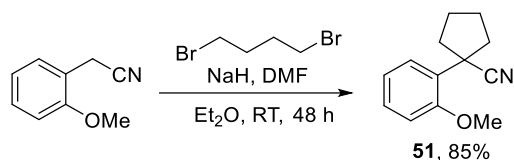

To a suspension of oil-free sodium hydride (378 mg, 15.75 mmol, 3.15 equiv.) in DMF (18 mL) under nitrogen was added a solution of 2-methoxyphenylacetonitrile (736 mg, 5 mmol, 1 equiv.) and 1,4-dibromobutane (2.69 mL, 22.5 mmol, 4.5 equiv.) in diethyl ether (9 mL) at room temperature. The resulting mixture was stirred at room temperature for 48 h, then quenched by addition of methanol. The resulting mixture was concentrated under reduced pressure and redissolved in diethyl ether. The solution was washed with water, sodium bisulfite and saturated sodium carbonate solution, then dried over Na<sub>2</sub>SO<sub>4</sub>, filtered and concentrated under reduced pressure. Purification by column chromatography (hexane:ethyl acetate, 100:0 → 95:5) afforded 1-(2-methoxyphenyl)cyclopentane-1-carbonitrile **51** as a white solid (854 mg, 85%). **Mp** = 71-73 °C (lit. mp = 67-68 °C).<sup>5</sup> **<sup>1</sup>H NMR** (400 MHz, CDCl<sub>3</sub>) 1.80 - 1.94 (m, 2 H, 2 x CH), 1.94 - 2.07 (m, 2 H, 2 x CH), 2.07 - 2.18 (m, 2 H, 2 x CH), 2.48 - 2.61 (m, 2

H, 2 x CH), 3.93 (s, 3 H, OCH<sub>3</sub>), 6.90 - 7.00 (m, 2 H, 2 x ArH), 7.28 - 7.36 (m, 2 H, 2 x ArH). <sup>13</sup>C NMR (101 MHz, CDCl<sub>3</sub>) 23.8, 37.7, 44.7, 55.5, 111.7, 120.4, 124.5, 126.5, 127.5, 129.3, 157.6. ATR-IR  $\nu_{\text{max}}$  (neat)/cm<sup>-1</sup> 2962, 2916, 2223, 1597, 1490, 1462, 1435, 1294, 1253, 1126, 1056, 1024, 952, 943, 898, 786, 653. *m/z* (EI): 201.1 (M<sup>+</sup>, 59), 186.1 (18), 172.1 (18), 159.1 (51), 144.1 (100), 131.1 (22), 116.1 (27), 103.1 (15), 89.0 (19), 77.0 (16), 63.0 (11), 51.0 (9). The data for this compound are consistent with those previously reported in the literature.<sup>5</sup>

#### Preparation of 1-(2-methoxyphenyl)cyclohexane-1-carbonitrile (**20**)

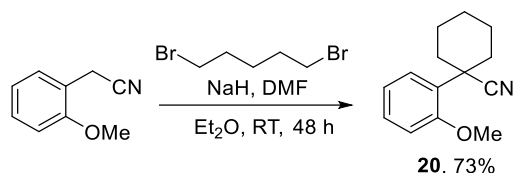

To a suspension of oil-free sodium hydride (378 mg, 15.75 mmol, 3.15 equiv.) in DMF (18 mL) under nitrogen was added a solution of 2-methoxyphenylacetonitrile (736 mg, 5 mmol, 1 equiv.) and 1,5-dibromopentane (3.06 mL, 22.5 mmol, 4.5 equiv.) in diethyl ether (9 mL) at room temperature. The resulting mixture was stirred at room temperature for 48 h, then quenched by addition of methanol. The resulting mixture was concentrated under reduced pressure and redissolved in diethyl ether. The solution was washed with water, sodium bisulfite and saturated sodium carbonate solution, then dried over Na<sub>2</sub>SO<sub>4</sub>, filtered and concentrated under reduced pressure. Purification by column chromatography (hexane:ethyl acetate, 100:0 → 9:1), followed by recrystallisation from hexane, afforded 1-(2-methoxyphenyl)cyclohexane-1-carbonitrile **20** as a white solid (796 mg, 73%). *Mp* = 101-103 °C (lit. *mp* = 102-103 °C).<sup>5</sup> <sup>1</sup>H NMR (400 MHz, CDCl<sub>3</sub>) 1.17 - 1.34 (m, 1 H, CH), 1.78 (td, *J* = 13.0, 3.5 Hz, 2 H, 2 x CH), 1.81 - 1.97 (m, 5 H, 5 x CH), 2.38 (d, *J* = 12.1 Hz, 2 H, 2 x CH), 3.93 (s, 3 H, OCH<sub>3</sub>), 6.95 - 7.00 (m, 2 H, 2 x ArH), 7.29 - 7.36 (m, 2 H, 2 x ArH). <sup>13</sup>C NMR (101 MHz, CDCl<sub>3</sub>) 23.3, 25.3, 34.5, 40.8, 55.5, 112.2, 120.8, 122.5, 125.9, 129.1, 129.1, 157.6. ATR-IR  $\nu_{\text{max}}$  (neat)/cm<sup>-1</sup> 2931, 2860, 2229, 1597, 1581, 1489, 1456, 1436, 1292, 1249, 1122, 1012, 904, 785, 731. *m/z* (EI): 215.2 (M<sup>+</sup>, 78), 200.1 (4), 186.1 (18), 172.1 (21), 159.1 (68), 144.1 (100), 131.1 (22), 116.1 (30), 103.1 (14), 89.0 (19), 77.0 (16), 63.0 (8), 51.0 (8). The data for this compound are consistent with those previously reported in the literature.<sup>5</sup>

#### Preparation of 2-(2-methoxypyridin-3-yl)-2-propylpentanenitrile (**55**)

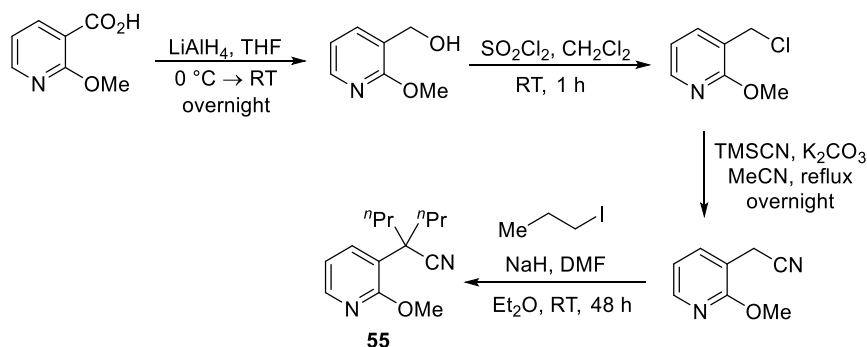

This substrate was prepared according to a modified literature procedure.<sup>6</sup> To a solution of LiAlH<sub>4</sub> (2 M in THF, 5.5 mL, 11 mmol, 1.1 equiv.) at 0 °C under nitrogen was added a solution of 2-methoxynicotinic acid (1.53 g, 10 mmol, 1 equiv.) in dry THF (21 mL). The resulting mixture was stirred overnight at room temperature and then cooled in an ice bath. The reaction was quenched by the dropwise addition of a THF:water (4:1) solution, until bubbling ceased. 2 M NaOH solution was then added and the reaction mixture was extracted into diethyl ether. The combined organic layers were dried over a hydrophobic frit and concentrated under reduced pressure to afford (2-methoxypyridin-3-yl)methanol as a yellow oil, which required no further purification (1.26 g, 90%). **<sup>1</sup>H NMR** (400 MHz, CDCl<sub>3</sub>) 4.00 (s, 3H, OCH<sub>3</sub>), 4.66 (s, 2H, CH<sub>2</sub>), 6.89 (dd, *J* = 5.1, 7.1 Hz, 1H, ArH), 7.65 - 7.54 (m, 1H, ArH), 8.10 (dd, *J* = 5.4, 2.0 Hz, 1H, ArH). **<sup>13</sup>C NMR** (101 MHz, CDCl<sub>3</sub>) 53.3, 61.0, 116.9, 123.3, 136.5, 145.8, 161.6. **ATR-IR**  $\nu_{\text{max}}$  (neat)/cm<sup>-1</sup> 3326, 2950, 1588, 1462, 1410, 1362, 1307, 1110, 1019, 782. ***m/z* (CI)** 140.1 ([M+H]<sup>+</sup>). The data for this compound are consistent with those previously reported in the literature.<sup>7</sup>

To a solution of (2-methoxypyridin-3-yl)methanol (1.257 g, 9.03 mmol, 1 equiv.) in dry DCM (43 mL) was added SOCl<sub>2</sub> (1.65 mL, 22.58 mmol, 2.5 equiv.) dropwise. The mixture was stirred for 1 h at room temperature. The mixture was then quenched by the addition of a sodium acetate/ice solution and the mixture was stirred for 10 min. The resulting solution was neutralized with NaHCO<sub>3</sub> solution and the organic phase was separated and dried over a hydrophobic frit. Removal of the solvent under reduced pressure afforded 3-(chloromethyl)-2-methoxypyridine as a colourless oil (1.35 g, 95%), which was used crude without any further purification. **<sup>1</sup>H NMR** (400 MHz, CDCl<sub>3</sub>) 4.02 (s, 3H, OCH<sub>3</sub>), 4.61 (s, 2H, CH<sub>2</sub>), 6.91 (dd, *J* = 7.3, 5.4 Hz, 1H, ArH), 7.68 (dd, *J* = 7.1, 1.7 Hz, 1H, ArH), 8.10 (dd, *J* = 5.4, 2.0 Hz, 1H, ArH). **<sup>13</sup>C NMR** (101 MHz, CDCl<sub>3</sub>) 40.9, 53.6, 116.8, 120.2, 138.5, 147.0, 161.5. **ATR-IR**  $\nu_{\text{max}}$  (neat)/cm<sup>-1</sup> 2954, 2854, 1585, 1466, 1409, 1307, 1253, 1199, 1017, 856, 776, 582, 497. **HRMS (CI)** calcd. for C<sub>7</sub>H<sub>9</sub>NOCl<sup>+</sup> ([M+H]<sup>+</sup>): 158.0373, found: 158.0371.

To a mixture of 3-(chloromethyl)-2-methoxypyridine (473 mg, 3 mmol, 1 equiv.) and potassium carbonate (498 mg, 3.6 mmol, 1.2 equiv.) in acetonitrile (30 mL) was added trimethylsilyl cyanide (0.40 mL, 3 mmol, 1 equiv.). The reaction mixture was refluxed overnight, then cooled to room temperature and diluted with 2 M NaOH solution to pH 14. The layers were separated, and the aqueous layer was extracted with DCM. The combined organic phases were washed with 2 M NaOH and brine, dried over a hydrophobic frit, and the solvent was removed under reduced pressure. Purification by column chromatography (cyclohexane:ethyl acetate, 100:0 → 4:1) afforded 2-(2-methoxypyridin-3-yl)acetonitrile as a colourless oil (212 mg, 48%). **<sup>1</sup>H NMR** (400 MHz, CDCl<sub>3</sub>) 3.67 (s, 2H, CH<sub>2</sub>), 4.00 (s, 3H, OCH<sub>3</sub>), 6.93 (dd, *J* = 7.4, 4.9 Hz, 1H, ArH), 7.68 (d, *J* = 7.2 Hz, 1H, ArH), 8.15 (dd, *J* = 4.9, 2.0 Hz, 1H, ArH). **<sup>13</sup>C NMR** (101 MHz, CDCl<sub>3</sub>) 18.5, 53.7, 113.3, 116.9, 117.0, 137.4, 146.7, 161.1. **ATR-IR**

$\nu_{\max}$  (neat)/cm<sup>-1</sup> 2987, 2953, 2856, 2252, 1589, 1465, 1411, 1313, 1257, 1161, 1105, 1016, 779, 754. **HRMS (CI)** calcd. for C<sub>8</sub>H<sub>9</sub>N<sub>2</sub>O<sup>+</sup> ([M+H]<sup>+</sup>): 149.0715, found: 149.0717.

To a suspension of sodium hydride (108 mg, 4.5 mmol, 3.15 equiv.) in DMF (4 mL) under nitrogen was added a solution of 2-(2-methoxypyridin-3-yl)acetonitrile (212 mg, 1.43 mmol, 1 equiv.) and 1-iodopropane (0.63 mL, 6.44 mmol, 4.5 equiv.) in diethyl ether (2 mL). The resulting mixture was stirred for 48 h at room temperature and then quenched by addition of methanol. The crude residue was redissolved in diethyl ether, washed with water, saturated sodium sulfite solution and saturated sodium carbonate solution, dried over a hydrophobic frit and concentrated under reduced pressure. Purification by column chromatography (hexane:ethyl acetate, 100:0 → 4:1) afforded 2-(2-methoxypyridin-3-yl)-2-propylpentanenitrile **55** as a colourless oil (202 mg, 61%). **<sup>1</sup>H NMR** (400 MHz, CDCl<sub>3</sub>) 0.89 (t, *J* = 7.3 Hz, 6 H, 2 x CH<sub>3</sub>), 1.00 - 1.14 (m, 2 H, 2 x CH), 1.43 (tdd, *J* = 12.5, 7.4, 4.8 Hz, 2 H, 2 x CH), 1.90 (td, *J* = 12.9, 4.7 Hz, 2 H, 2 x CH), 2.27 (td, *J* = 12.9, 4.7 Hz, 2 H, 2 x CH), 3.98 (s, 3 H, OCH<sub>3</sub>), 6.91 (dd, *J* = 7.4, 5.0 Hz, 1 H, ArH), 7.83 (dd, *J* = 7.4, 1.6 Hz, 1 H, ArH), 8.13 (dd, *J* = 5.0, 1.6 Hz, 1 H, ArH). **<sup>13</sup>C NMR** (101 MHz, CDCl<sub>3</sub>) 14.0, 19.0, 39.1, 47.9, 53.3, 116.8, 120.4, 122.8, 138.3, 146.0, 160.4. **ATR-IR**  $\nu_{\max}$  (neat)/cm<sup>-1</sup> 2958, 2931, 2873, 2233, 1581, 1462, 1406, 1099, 1014, 800, 777, 711. ***m/z* (EI)**: 232.2 (M<sup>+</sup>, 16), 203.1 (6), 189.1 (100), 173.1 (3), 162.1 (30), 147.1 (27), 130.1 (7), 117.0 (6), 104.1 (5), 92.0 (4), 77.0 (4), 65.0 (2), 51.0 (2). **HRMS (CI)** calcd. for C<sub>14</sub>H<sub>21</sub>N<sub>2</sub>O<sup>+</sup> ([M+H]<sup>+</sup>): 233.1648, found: 233.1650.

#### Preparation of 2-ethyl-2-(2-methoxyphenyl)butanenitrile (**25**)

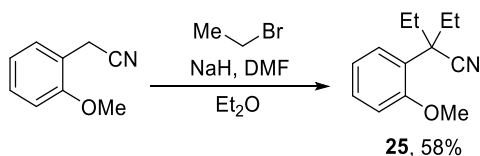

To a stirred solution of sodium hydride (227 mg, 9.45 mmol, 3.15 equiv.) in DMF (11 mL) was added 2-(2-methoxyphenyl)acetonitrile (442 mg, 3.00 mmol, 1.00 equiv.) and bromoethane (1 mL, 13.50 mmol, 4.50 equiv.) in Et<sub>2</sub>O (5.5 mL) under argon. The resulting mixture was stirred at room temperature overnight. The reaction mixture was quenched with methanol and concentrated under reduced pressure. The resulting product was re-dissolved in Et<sub>2</sub>O and was washed with water, sodium bisulfite and sodium carbonate and was dried by passing through a phase separator and concentrated under reduced pressure. Purification by column chromatography (0-5% Et<sub>2</sub>O/hexane) afforded 2-ethyl-2-(2-methoxyphenyl)butanenitrile **25** as a brown oil (355 mg, 58%). **<sup>1</sup>H NMR** (400 MHz, CDCl<sub>3</sub>)  $\delta$  7.51 (dd, *J* = 7.7, 1.6 Hz, 1H, ArH), 7.33 – 7.28 (m, 1H, ArH), 6.97 (td, *J* = 7.6, 1.2 Hz, 1H, ArH), 6.91 (dd, *J* = 8.2, 1.0 Hz, 1H, ArH), 3.84 (s, 3H, OCH<sub>3</sub>), 2.39 – 2.28 (m, 2H, CH<sub>2</sub>), 2.06 – 1.95 (m, 2H, CH<sub>2</sub>), 0.90 (t, *J* = 7.4 Hz, 6H, 2 x CH<sub>3</sub>). **<sup>13</sup>C NMR** (101 MHz, CDCl<sub>3</sub>)  $\delta$  157.0, 129.9, 129.0, 124.8, 123.2, 120.6, 111.7, 55.2, 49.8,



30.2, 10.0. **ATR-IR**  $\nu_{\text{max}}$  (neat)/ $\text{cm}^{-1}$  2968, 2933, 2884, 2842, 2231, 1568, 1581, 1492. **HRMS (CI)** calcd for  $\text{C}_{13}\text{H}_{18}\text{NO}^+$  ( $[\text{M}+\text{H}]^+$ ) 204.1383, found 204.1383.

#### Preparation of 2-ethyl-2-(2-ethoxyphenyl)butanenitrile (**31**)

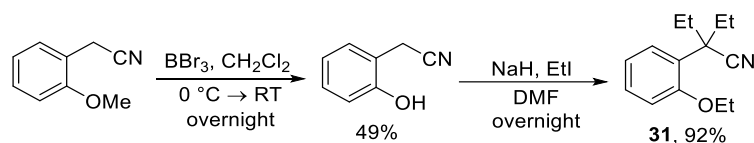

To a solution of 2-methoxyphenylacetonitrile (2.94 g, 20.0 mmol, 1 equiv.) in  $\text{CH}_2\text{Cl}_2$  (88.0 mL),  $\text{BBr}_3$  (5.78 mL, 60.0 mmol, 3 equiv.) was added slowly at 0 °C. The reaction mixture was then warmed to RT and stirred overnight. Upon completion, the reaction mixture was quenched by pouring in crushed ice. The aqueous layer was extracted with EtOAc (x 3) and the combined organic layers were dried over  $\text{Na}_2\text{SO}_4$ , filtered and reduced *in vacuo*. The residue was purified by column chromatography (100% hexane to 3:1 hexane:EtOAc) to afford 2-(2-hydroxyphenyl)acetonitrile (1.31 g, 49%) as a yellow solid. **Mp** = 110-111 °C (lit. mp = 113-114 °C).<sup>8</sup>  **$^1\text{H}$  NMR** (400 MHz,  $\text{CDCl}_3$ )  $\delta$  3.73 (s, 2H,  $\text{CH}_2$ ), 4.99 (s, 1H, OH), 6.78 (d,  $J$  = 8.0 Hz, 1H, ArH), 6.97 (td,  $J$  = 7.5, 1.2 Hz, 1H, ArH), 7.21 (td,  $J$  = 7.8, 1.6 Hz, 1H, ArH), 7.31 - 7.40 (m, 1H, ArH).  **$^{13}\text{C}$  NMR** (101 MHz,  $\text{CDCl}_3$ )  $\delta$  18.6 ( $\text{CH}_2$ ), 115.5 (CH), 117.1 (C), 118.1 (C), 121.5 (CH), 129.7 (CH), 129.8 (CH), 153.2 (C). **ATR-IR**  $\nu_{\text{max}}$  (neat)/ $\text{cm}^{-1}$  3325, 2259, 1595, 1506, 1460, 1410, 1358, 1273, 1233, 1171, 1099, 1040, 925, 912, 858, 845, 758, 725, 648.  **$m/z$  (EI)**: 133.1 ( $\text{M}^+$ , 51%), 104.3 (45), 78.1 (100), 64.0 (22), 55.1 (68).

An oven-dried 3-neck flask was taken into the glovebox, where NaH (649 mg, 27.0 mmol, 9 equiv.) was added. The flask was sealed under argon and taken outside the glovebox. DMF (12.0 mL) was then added followed by 2-(2-hydroxyphenyl)acetonitrile (400 mg, 3.00 mmol, 1 equiv.). EtI (2.17 mL, 27.0 mmol, 9 equiv.) was added slowly and the reaction mixture was stirred overnight at RT. The reaction was then quenched with water and the aqueous layer was extracted with EtOAc (x 3). The combined organic layers were dried over  $\text{Na}_2\text{SO}_4$ , filtered and reduced *in vacuo*. 2-(2-Ethoxyphenyl)-2-ethylbutanenitrile **31** (603 mg, 92%) was obtained as a yellow oil.  **$^1\text{H}$  NMR** (400 MHz,  $\text{CDCl}_3$ )  $\delta$  0.92 (t,  $J$  = 7.4 Hz, 6H,  $\text{CH}_3$ ), 1.47 (t,  $J$  = 7.0 Hz, 3H,  $\text{CH}_3$ ), 1.95 - 2.08 (m, 2H,  $\text{CH}_2$ ), 2.33 - 2.46 (m, 2H,  $\text{CH}_2$ ), 4.09 (q,  $J$  = 7.0 Hz, 2H,  $\text{CH}_2$ ), 6.90 (dd,  $J$  = 8.2, 1.3 Hz, 1H, ArH), 6.96 (td,  $J$  = 7.6, 1.2 Hz, 1H, ArH), 7.24 - 7.33 (m, 1H, ArH), 7.52 (dd,  $J$  = 7.7, 1.6 Hz, 1H, ArH).  **$^{13}\text{C}$  NMR** (101 MHz,  $\text{CDCl}_3$ )  $\delta$  10.21 ( $\text{CH}_3$ ), 14.89 ( $\text{CH}_3$ ), 30.46 ( $\text{CH}_2$ ), 50.06 (C), 63.85 ( $\text{CH}_2$ ), 112.34 (CH), 120.57 (CH), 123.45 (C), 124.72 (C), 129.13 (CH), 130.13 (CH), 156.38 (C). **ATR-IR**  $\nu_{\text{max}}$  (neat)/ $\text{cm}^{-1}$  2232, 1599, 1584, 1493, 1445, 1393, 1294, 1244, 1090, 1040, 924, 889, 750. **HRMS (CI)** calculated for  $\text{C}_{14}\text{H}_{20}\text{NO}$  ( $[\text{M}+\text{H}]^+$ ): 218.1545, found: 218.1545.



### Preparation of 3-(2-methoxyphenyl)-2,2-dimethylpropanenitrile (**27**)

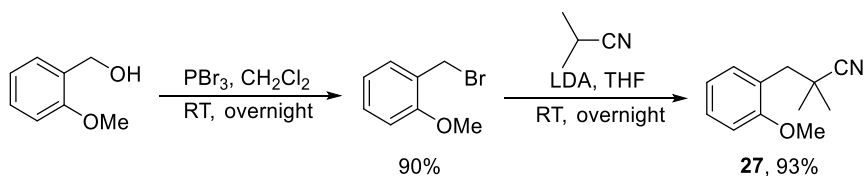

To a stirring solution of (2-methoxyphenyl)methanol (1 mL, 7.20 mmol, 1.00 equiv.) in DCM (14 mL) at 0 °C was added phosphorus tribromide (1 mL, 10.90 mmol, 1.50 equiv.) and the solution was allowed to warm to room temperature and stirred overnight. The reaction mixture was quenched with water, extracted into Et<sub>2</sub>O and dried by passing through a phase separator. The solvent was removed under reduced pressure to afford 1-(bromomethyl)-2-methoxybenzene as a brown oil (1.30 g, 90%), without further purification required. **<sup>1</sup>H NMR** (400 MHz, CDCl<sub>3</sub>) δ 7.34 (dd, *J* = 7.5, 1.7 Hz, 1H, ArH), 7.31 (ddd, *J* = 8.1, 7.6, 1.7 Hz, 1H, ArH), 6.94 (td, *J* = 7.5, 1.0 Hz, 1H, ArH), 6.90 (d, *J* = 8.1 Hz, 1H, ArH), 4.59 (s, 2H, CH<sub>2</sub>), 3.91 (s, 3H, OCH<sub>3</sub>). **<sup>13</sup>C NMR** (101 MHz, CDCl<sub>3</sub>) δ 157.5, 130.9, 130.2, 126.1, 120.7, 111.0, 55.6, 29.0. **ATR-IR**  $\nu_{\text{max}}$  (neat)/cm<sup>-1</sup> 2993, 2935, 2831, 1599, 1490, 1460, 1288, 1026. ***m/z* (EI)**: 200.0 (M<sup>+</sup>, 75%), 121.2 (100), 106.1 (40), 91.2 (99).

To a stirring solution of isobutyronitrile 171 (0.11 mL, 1.25 mmol, 0.50 equiv.) in THF (3 mL) at -78 °C was added LDA in THF/heptane/ethylbenzene (0.34 M) (4.00 mL, 1.36 mmol, 0.55 equiv.) and the solution was stirred for 20 min. 1-(Bromomethyl)-2-methoxybenzene (500 mg, 2.50 mmol, 1.00 equiv.) was added to the mixture and the solution stirred for 30 min at -78 °C. The stirring solution was allowed to warm to room temperature and stirred overnight. The resulting solution was quenched with saturated NH<sub>4</sub>Cl and extracted into Et<sub>2</sub>O, with the organic layers passed through a phase separator and solvent removed under reduced pressure. Purification by column chromatography (0-5% Et<sub>2</sub>O/hexane), afforded 3-(2-methoxyphenyl)-2,2- dimethylpropanenitrile **27** as a colourless oil (220 mg, 93%). **<sup>1</sup>H NMR** (400 MHz, CDCl<sub>3</sub>) δ 7.30 – 7.25 (m, 2H, 2 x ArH), 6.95 (td, *J* = 7.5, 1.1 Hz, 1H, ArH), 6.90 (d, *J* = 8.6 Hz, 1H, ArH), 3.82 (s, 3H, OCH<sub>3</sub>), 2.91 (s, 2H, CH<sub>2</sub>), 1.36 (s, 6H, 2 x CH<sub>3</sub>). **<sup>13</sup>C NMR** (101 MHz, CDCl<sub>3</sub>) δ 157.9, 131.9, 128.6, 125.2, 124.4, 120.4, 110.5, 55.1, 39.3, 33.8, 26.5. **ATR-IR**  $\nu_{\text{max}}$  (neat)/cm<sup>-1</sup> 2970, 2933, 2833, 2231, 1599, 1585, 1491, 1462. **HRMS (CI)** calcd for C<sub>12</sub>H<sub>19</sub>N<sub>2</sub>O<sup>+</sup> ([M+NH<sub>4</sub>]<sup>+</sup>) 207.1492, found 207.1490.

### Preparation of 3,3-dimethyl-2-phenyl-3*H*-indole (**72**)

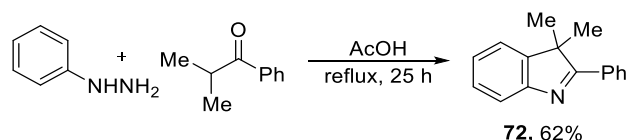

A solution of isobutyrylbenzene (1.0 eq., 20 mmol, 3.000 mL) and phenylhydrazine (1.0 eq., 20 mmol, 1.970 mL) in AcOH (30 mL) was stirred at reflux for 25 h under argon. Reaction was cooled to room temperature and concentrated under reduced pressure. The residue was redissolved in CH<sub>2</sub>Cl<sub>2</sub> and

washed with sat.  $\text{NaHCO}_3$ . The aqueous layer was separated from the organic layer and was further washed with  $\text{CH}_2\text{Cl}_2$ . The combined organic phases were dried over  $\text{Na}_2\text{SO}_4$ , filtered and concentrated. Purification by column chromatography (hexane  $\rightarrow$  2% EtOAc/98% hexane) afforded 3,3-dimethyl-2-phenyl-3*H*-indole **72** (2.723 g, 62%) as a pale yellow solid. **mp** = 37–39 °C (lit. mp = 39–41 °C).<sup>9</sup>  **$^1\text{H}$  NMR** (400 MHz,  $\text{CDCl}_3$ )  $\delta$  8.24 – 8.05 (m, 2H, 2 x ArH), 7.72 (d,  $J$  = 7.6 Hz, 1H, ArH), 7.53 – 7.45 (m, 3H, 3 x ArH), 7.42 – 7.33 (m, 2H, 2 x ArH), 7.33 – 7.22 (m, 1H, ArH), 1.61 (s, 6H, 2 x Me).  **$^{13}\text{C}$  NMR** (101 MHz,  $\text{CDCl}_3$ )  $\delta$  183.4, 153.1, 147.7, 133.4, 130.7, 128.7, 128.5, 127.9, 126.0, 121.1, 121.0, 53.7, 24.9. **ATR-IR**  $\nu_{\text{max}}$  (neat)/ $\text{cm}^{-1}$  3086, 3057, 3042, 3024, 2965, 2930, 2866, 1518, 1491, 1453, 1443, 1385, 1364, 1337, 1263, 1221, 1207, 1074, 1030, 1013, 1003, 988, 934, 922, 860, 746, 710, 694, 635.  **$m/z$  (EI)**: 221.1 ( $\text{M}^+$ , 100%), 206.1 (53), 178.0 (6), 165.0 (11), 144.0 (16), 128.1 (10), 115.0 (40), 103.0 (74), 91.0 (28), 77.0 (88), 63.0 (18), 51.0 (41). The data are consistent with those previously reported in the literature<sup>1</sup>

#### Preparation of 2'-phenylspiro[cyclohexane-1,3'-indole] (**76**)

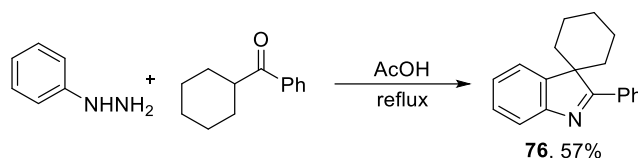

Prepared according to **General Procedure D** using cyclohexyl(phenyl)methanone (1.0 eq., 10 mmol, 1.883 g), phenylhydrazine (1.0 eq., 10 mmol, 985  $\mu\text{L}$ ) and AcOH (10 mL). Purification by column chromatography (hexane  $\rightarrow$  2% EtOAc/98% hexane) afforded 2'-phenylspiro[cyclohexane-1,3'-indole] **76** (1.496 g, 57%) as a viscous yellow oil.  **$^1\text{H}$  NMR** (400 MHz,  $\text{CDCl}_3$ )  $\delta$  8.06 (dd,  $J$  = 6.7, 2.9 Hz, 2H, 2 x ArH), 7.83 (d,  $J$  = 7.5 Hz, 1H, ArH), 7.74 (d,  $J$  = 7.7 Hz, 1H, ArH), 7.54 – 7.45 (m, 3H, 3 x ArH), 7.41 (td,  $J$  = 7.6, 1.1 Hz, 1H, ArH), 7.32 – 7.18 (m, 1H, ArH), 2.30 (td,  $J$  = 13.4, 4.5 Hz, 2H, Cy), 2.12 – 1.93 (m, 3H, Cy), 1.93 – 1.77 (m, 2H, Cy), 1.63 – 1.49 (m, 1H, Cy), 1.45 (d,  $J$  = 13.7 Hz, 2H, Cy).  **$^{13}\text{C}$  NMR** (101 MHz,  $\text{CDCl}_3$ )  $\delta$  184.1, 153.6, 146.2, 133.9, 130.2, 128.8, 128.5, 127.8, 125.1, 124.5, 121.4, 58.6, 31.3, 25.3, 21.8. **ATR-IR**  $\nu_{\text{max}}$  3057, 2924, 2862, 1520, 1491, 1466, 1452, 1439, 1348, 1335, 1310, 1263, 1221, 1180, 1155, 1115, 1074, 1061, 1030, 1020, 1001, 988, 924, 905, 885, 851, 773, 748, 692, 673, 635, 625, 613.  **$m/z$  (EI)**: 261.1 ( $\text{M}^+$ , 100%), 246.1 (2), 232.1 (49), 217.1 (17), 204.1 (30), 184.1 (23), 170.1 (8), 156.1 (11), 143.1 (4), 131.1 (26), 115.1 (21), 103.0 (10), 91.0 (10), 77.0 (12), 63.0 (3), 51.0 (5). The data are consistent with those previously reported in the literature<sup>1</sup>

#### Preparation of 2-(4-methoxyphenyl)-3,3-dimethyl-3*H*-indole

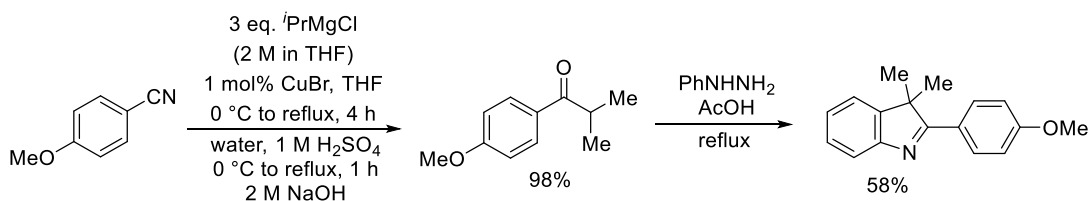

1-(4-Methoxyphenyl)-2-methylpropan-1-one was prepared according to **General Procedure E** using  $i$ PrMgCl (3.0 eq., 30 mmol, 15 mL) as a 2 M solution in THF, 4-methoxybenzonitrile (1.0 eq., 10 mmol, 1.322 g), dry THF (10 mL) and CuBr (1 mol%, 0.1 mmol, 14.35 mg). The 1-(4-methoxyphenyl)-2-methylpropan-1-one (1.752 g, 98%) product was isolated as a yellow liquid.  $^1\text{H NMR}$  (400 MHz,  $\text{CDCl}_3$ )  $\delta$  7.95 (d,  $J$  = 8.9 Hz, 2H, 2 x ArH), 6.94 (d,  $J$  = 8.9 Hz, 2H, 2 x ArH), 3.87 (s, 3H, MeO), 3.51 (hept,  $J$  = 6.8 Hz, 1H, CH), 1.20 (d,  $J$  = 6.8 Hz, 6H, 2 x Me).  $^{13}\text{C NMR}$  (101 MHz,  $\text{CDCl}_3$ )  $\delta$  203.2, 163.4, 130.7, 129.3, 113.9, 55.6, 35.1, 19.4. **ATR-IR**  $\nu_{\text{max}}$  3003, 2968, 2932, 2872, 2839, 1672, 1597, 1574, 1508, 1462, 1418, 1381, 1350, 1306, 1258, 1225, 1179, 1157, 1113, 1084, 1030, 1009, 978, 870, 841, 800, 760, 687, 633, 602.  $m/z$  (**EI**): 178.1 ( $\text{M}^+$ , 5%), 135.0 (100), 107.0 (8), 92.0 (20), 77.0 (22), 64.0 (11), 51.0 (2). The data are consistent with those previously reported in the literature<sup>2</sup>

2-(4-Methoxyphenyl)-3,3-dimethyl-3*H*-indole was prepared according to **General Procedure D** using 1-(4-methoxyphenyl)-2-methylpropan-1-one (1.0 eq., 7 mmol, 1.248 g), phenylhydrazine (1.0 eq., 7 mmol, 689.4  $\mu\text{L}$ ) and AcOH (10 mL). Purification by column chromatography (hexane  $\rightarrow$  7% EtOAc/93% hexane) afforded 2-(4-methoxyphenyl)-3,3-dimethyl-3*H*-indole (1.021 g, 58%) as a white solid. **mp** = 97-100  $^\circ\text{C}$  (no mp reported in the lit.).  $^1\text{H NMR}$  (400 MHz,  $\text{CDCl}_3$ )  $\delta$  8.15 (d,  $J$  = 9.0 Hz, 2H, 2 x ArH), 7.67 (d,  $J$  = 7.6 Hz, 1H, ArH), 7.42 – 7.29 (m, 2H, 2 x ArH), 7.24 (td,  $J$  = 7.4, 1.2 Hz, 1H, ArH), 7.00 (d,  $J$  = 9.0 Hz, 2H, 2 x ArH), 3.88 (s, 3H, MeO), 1.59 (s, 6H, 2 x Me).  $^{13}\text{C NMR}$  (101 MHz,  $\text{CDCl}_3$ )  $\delta$  182.7, 161.6, 153.3, 147.6, 130.1, 127.7, 126.0, 125.4, 120.9, 120.5, 114.0, 55.4, 53.3, 25.0. **ATR-IR**  $\nu_{\text{max}}$  3042, 2999, 2970, 2957, 2928, 2833, 1603, 1578, 1506, 1468, 1454, 1420, 1385, 1366, 1337, 1314, 1269, 1246, 1213, 1184, 1167, 1109, 1088, 1030, 1013, 988, 972, 937, 866, 839, 818, 804, 772, 754, 694, 637.  $m/z$  (**EI**): 251.1 ( $\text{M}^+$ , 100%), 236.1 (44), 221.1 (4), 204.1 (5), 193.1 (8), 180.1 (3), 167.1 (5), 144.1 (10), 133.1 (7), 117.0 (28), 103.0 (32), 91.0 (20), 77.0 (31), 63.0 (10), 51.0 (9). The data are consistent with those previously reported in the literature<sup>1</sup>

#### Preparation of 2-(4-fluorophenyl)-3,3-dimethyl-3*H*-indole

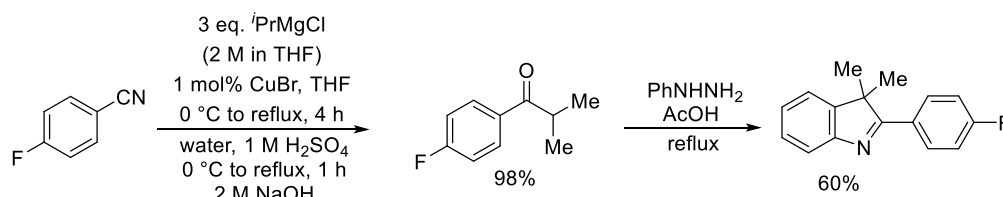

1-(4-Fluorophenyl)-2-methylpropan-1-one was prepared according to **General Procedure E** using  $i$ PrMgCl (3.0 eq., 30 mmol, 15 mL) as a 2 M solution in THF, 4-fluorobenzonitrile (1.0 eq., 10 mmol, 1.322 g), dry THF (10 mL) and CuBr (1 mol%, 0.1 mmol, 14.35 mg). The 1-(4-fluorophenyl)-2-methylpropan-1-one (1.630 g, 98%) product was isolated as an orange liquid.  $^1\text{H NMR}$  (400 MHz,  $\text{CDCl}_3$ )  $\delta$  8.05 – 7.92 (m, 2H, 2 x ArH), 7.20 – 7.07 (m, 2H, 2 x ArH), 3.51 (hept,  $J$  = 6.8 Hz, 1H, CH), 1.21 (d,  $J$  = 6.8 Hz, 6H, 2 x Me).  $^{13}\text{C NMR}$  (101 MHz,  $\text{CDCl}_3$ )  $\delta$  203.0, 165.7 (d,  $J$  = 254.3 Hz), 132.7 (d,  $J$  = 2.6 Hz), 131.1 (d,  $J$  = 9.2 Hz), 115.8 (d,  $J$  = 21.7 Hz), 35.5, 19.3. **ATR-IR**  $\nu_{\text{max}}$  3071, 2972,

2934, 2874, 1682, 1595, 1504, 1468, 1410, 1383, 1350, 1296, 1283, 1219, 1152, 1103, 1013, 980, 870, 845, 816, 756, 681, 631. **m/z (EI):** 166.1 ( $M^+$ , 6%), 123.0 (100), 95.0 (50), 75.0 (27), 69.0 (4), 51.0 (2). The data are consistent with those previously reported in the literature<sup>2</sup>

2-(4-Fluorophenyl)-3,3-dimethyl-3*H*-indole was prepared according to **General Procedure D** using 1-(4-fluorophenyl)-2-methylpropan-1-one (1.0 eq., 7 mmol, 1.163 g), phenylhydrazine (1.0 eq., 7 mmol, 689.4  $\mu$ L) and AcOH (10 mL). Purification by column chromatography (hexane  $\rightarrow$  2% EtOAc/98% hexane) afforded 2-(4-fluorophenyl)-3,3-dimethyl-3*H*-indole (1.000 g, 60%) as a yellow solid. **Mp** = 61-64 °C (no mp reported in the lit.). **<sup>1</sup>H NMR** (400 MHz,  $CDCl_3$ )  $\delta$  8.17 (dd,  $J$  = 8.6, 5.6 Hz, 2H, 2 x ArH), 7.69 (d,  $J$  = 7.6 Hz, 1H, ArH), 7.46 – 7.33 (m, 2H, 2 x ArH), 7.33 – 7.23 (m, 1H, ArH), 7.19 (t,  $J$  = 8.6 Hz, 2H, 2 x ArH), 1.59 (s, 6H, 2 x Me). **<sup>13</sup>C NMR** (101 MHz,  $CDCl_3$ )  $\delta$  182.2, 164.3 (d,  $J$  = 252.2 Hz), 153.1, 147.6, 130.6 (d,  $J$  = 8.7 Hz), 129.71 (d,  $J$  = 2.3 Hz), 128.0, 126.0, 121.0 (d,  $J$  = 10.0 Hz), 116.0, 115.7, 53.6, 24.9. **ATR-IR  $\nu_{max}$**  3071, 2965, 2926, 2864, 1599, 1522, 1504, 1470, 1454, 1406, 1385, 1362, 1335, 1310, 1294, 1267, 1213, 1161, 1107, 1084, 1013, 989, 976, 935, 870, 841, 816, 770, 754, 735, 696, 637, 627. **m/z (EI):** 239.1 ( $M^+$ , 100%), 224.1 (57), 196.1 (4), 183.0 (12), 144.0 (16), 128.0 (11), 117.0 (43), 103.0 (34), 91.0 (25), 77.0 (49), 63.0 (13), 51.0 (20). The data are consistent with those previously reported in the literature<sup>5</sup>

#### Preparation of 3,3-dimethyl-2-(4-(trifluoromethyl)phenyl)-3*H*-indole

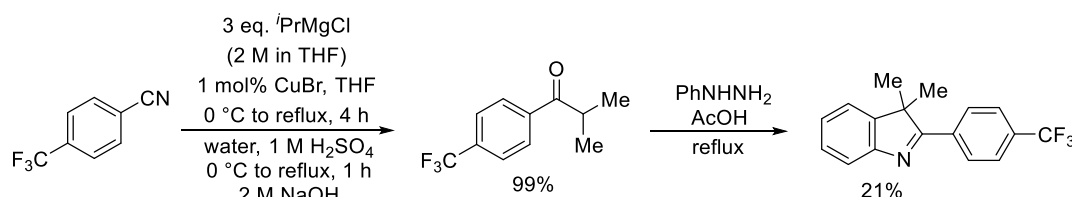

2-Methyl-1-(4-(trifluoromethyl)phenyl)propan-1-one was prepared according to **General Procedure E** using  $i$ PrMgCl (3.0 eq., 30 mmol, 15 mL) as a 2 M solution in THF, 4-(trifluoromethyl)benzonitrile (1.0 eq., 10 mmol, 1.712 g), dry THF (10 mL) and CuBr (1 mol%, 0.1 mmol, 14.35 mg). The 2-methyl-1-(4-(trifluoromethyl)phenyl)propan-1-one (2.131 g, 99%) product was isolated as a brown liquid. **<sup>1</sup>H NMR** (400 MHz,  $CDCl_3$ )  $\delta$  8.05 (d,  $J$  = 8.1 Hz, 2H, 2 x ArH), 7.73 (d,  $J$  = 8.1 Hz, 2H, 2 x ArH), 3.54 (hept,  $J$  = 6.8 Hz, 1H, CH), 1.23 (d,  $J$  = 6.8 Hz, 6H, 2 x Me). **<sup>13</sup>C NMR** (101 MHz,  $CDCl_3$ )  $\delta$  203.6, 139.1, 134.3 (q,  $J$  = 32.7 Hz), 128.8, 125.8 (q,  $J$  = 3.5 Hz), 123.8 (q,  $J$  = 272.9 Hz), 36.0, 19.0. **ATR-IR  $\nu_{max}$**  2974, 2936, 2876, 1690, 1582, 1510, 1468, 1408, 1385, 1321, 1219, 1163, 1126, 1113, 1067, 1016, 982, 853, 766, 723, 696. **m/z (EI):** 216.0 ( $M^+$ , 4%), 197.1 (3), 173.0 (100), 145.0 (46), 125.0 (7), 95.0 (7), 75.0 (5), 51.0 (1). The data are consistent with those previously reported in the literature<sup>2</sup>

3,3-Dimethyl-2-(4-(trifluoromethyl)phenyl)-3*H*-indole was prepared according to **General Procedure D** using 2-methyl-1-[4-(trifluoromethyl)phenyl]propan-1-one (1.0 eq., 7 mmol, 1.513 g), phenylhydrazine (1.0 eq., 7 mmol, 689.4  $\mu$ L) and AcOH (10 mL). Purification by column

chromatography (hexane  $\rightarrow$  2% EtOAc/98% hexane) afforded 3,3-dimethyl-2-(4-(trifluoromethyl)phenyl)-3*H*-indole (424 mg, 21%) as a yellow solid. **Mp** = 96-98 °C (no mp reported in the lit.). **<sup>1</sup>H NMR** (400 MHz, CDCl<sub>3</sub>)  $\delta$  8.25 (d,  $J$  = 8.2 Hz, 2H, 2 x ArH), 7.80 – 7.67 (m, 3H, 3 x ArH), 7.44 – 7.28 (m, 3H, 3 x ArH), 1.60 (s, 6H, 2 x Me). **<sup>13</sup>C NMR** (101 MHz, CDCl<sub>3</sub>)  $\delta$  181.9, 153.0, 147.7, 136.7, 132.1 (q,  $J$  = 32.6 Hz), 128.7, 128.1, 126.7, 125.7 (q, 3.2 Hz), 124.1 (q,  $J$  = 271.1 Hz), 121.5, 121.2, 53.8, 24.6. **ATR-IR**  $\nu_{\text{max}}$  3073, 3026, 2976, 2967, 2930, 2868, 1618, 1518, 1472, 1454, 1408, 1321, 1308, 1165, 1125, 1111, 1090, 1067, 1013, 991, 934, 864, 845, 789, 772, 748, 698, 683, 600. ***m/z* (EI)**: 289.1 (M<sup>+</sup>, 100%), 274.1 (56), 254.1 (1), 233.1 (5), 218.1 (2), 204.1 (10), 179.1 (8), 144.1 (17), 130.5 (9), 117.1 (31), 103.1 (25), 91.0 (14), 77.0 (24), 63.0 (4), 51.0 (8). The data are consistent with those previously reported in the literature<sup>1</sup>

#### Preparation of 3,3-dimethyl-2-(*p*-tolyl)-3*H*-indole

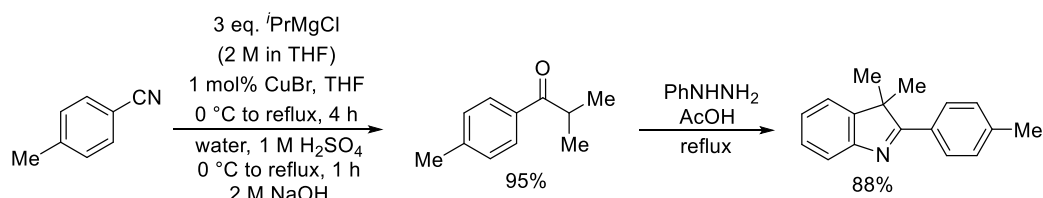

2-Methyl-1-(*p*-tolyl)propan-1-one was prepared according to **General Procedure E** using <sup>i</sup>PrMgCl (3.0 eq., 30 mmol, 15 mL) as a 2 M solution in THF, 4-methylbenzonitrile (1.0 eq., 10 mmol, 1.172 g), dry THF (10 mL) and CuBr (1 mol%, 0.1 mmol, 14.35 mg). The 2-methyl-1-(*p*-tolyl)propan-1-one (1.537 g, 95%) product was isolated as a yellow liquid. **<sup>1</sup>H NMR** (400 MHz, CDCl<sub>3</sub>)  $\delta$  7.86 (d,  $J$  = 8.0 Hz, 2H, 2 x ArH), 7.26 (d,  $J$  = 8.0 Hz, 2H, 2 x ArH), 3.53 (hept,  $J$  = 6.8 Hz, 1H, CH), 2.41 (s, 3H, Me), 1.21 (d,  $J$  = 6.8 Hz, 6H, 2 x Me). **<sup>13</sup>C NMR** (101 MHz, CDCl<sub>3</sub>)  $\delta$  204.3, 143.6, 133.8, 129.4, 128.6, 35.3, 21.7, 19.3. **ATR-IR**  $\nu_{\text{max}}$  3030, 2970, 2932, 2872, 1678, 1607, 1572, 1466, 1408, 1381, 1350, 1288, 1229, 1209, 1186, 1161, 1119, 1084, 1038, 976, 870, 827, 745, 685, 637. ***m/z* (EI)**: 162.1 (M<sup>+</sup>, 6%), 119.1 (100), 91.1 (38), 65.0 (16), 51.0 (2). The data are consistent with those previously reported in the literature<sup>2</sup>

3,3-Dimethyl-2-(*p*-tolyl)-3*H*-indole was prepared according to **General Procedure D** using 2-methyl-1-(*p*-tolyl)propan-1-one (1.0 eq., 7 mmol, 1.135 g), phenylhydrazine (1.0 eq., 7 mmol, 689.4  $\mu$ L) and AcOH (10 mL). An extra portion of phenylhydrazine (1.0 eq., 7 mmol, 689.4  $\mu$ L) was added after 16 h in order to push the reaction to completion and the reaction was further refluxed for 16 h. Purification by column chromatography (hexane  $\rightarrow$  2% EtOAc/98% hexane) afforded 3,3-dimethyl-2-(*p*-tolyl)-3*H*-indole (1.445 mg, 88%) as a yellow oil. **<sup>1</sup>H NMR** (400 MHz, CDCl<sub>3</sub>)  $\delta$  8.07 (d,  $J$  = 8.3 Hz, 2H, 2 x ArH), 7.69 (d,  $J$  = 7.6 Hz, 1H, ArH), 7.43 – 7.20 (m, 5H, 5 x ArH), 2.43 (s, 3H, Me), 1.60 (s, 6H, 2 x Me). **<sup>13</sup>C NMR** (101 MHz, CDCl<sub>3</sub>)  $\delta$  183.3, 153.3, 147.7, 141.0, 130.6, 129.5, 128.5, 127.8, 125.7, 121.0, 120.8, 53.5, 25.0, 21.6. **ATR-IR**  $\nu_{\text{max}}$  3061, 3024, 2963, 2926, 2864, 1607, 1508, 1468, 1454, 1408, 1385, 1364, 1337, 1314, 1265, 1211, 1184, 1169, 1117, 1107, 1088, 1036, 1013, 993, 935, 862,

822, 772, 750, 727, 694, 640, 629. **m/z (EI):** 235.2 ( $M^+$ , 100%), 220.1 (61), 204.1 (8), 191.1 (1), 179.1 (7), 165.1 (1), 153.1 (1), 144.1 (10), 128.1 (5), 117.1 (27), 103.2 (21), 91.1 (16), 77.1 (20), 65.1 (7), 51.1 (7). The data are consistent with those previously reported in the literature<sup>10</sup>

#### Preparation of 3,3-diallyl-2-phenyl-3*H*-indole (**82**)

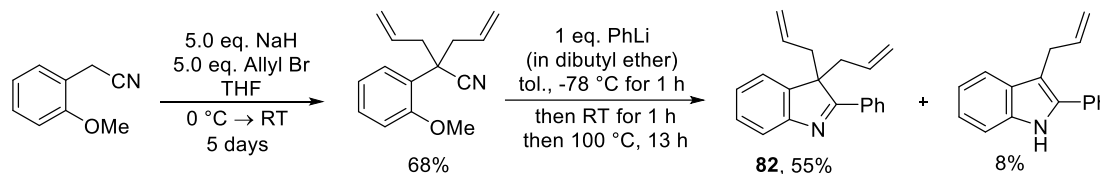

This substrate was prepared according to a modified literature procedure.<sup>5</sup> 2-Methoxyphenylacetonitrile (1.0 eq., 10.0 mmol, 1.472 g) was added portion wise to a slurry of NaH (5.0 eq., 50.0 mmol, 1.200 g) in dry THF (100 mL) at 0 °C under argon. Reaction mixture was warmed up to room temperature and was stirred for 1 h before allyl bromide (5.0 eq., 50.0 mmol, 4.327 mL) was added. Reaction was stirred a room temperature over ~ 5 days and the reaction progress was monitored by TLC. Once all 2-methoxyphenylacetonitrile was consumed, the reaction mixture was quenched with  $\text{NH}_4\text{Cl}$  (100 mL) at 0 °C. The reaction mixture was then extracted with EtOAc (3 x 50 mL). The combined organic phases were dried over  $\text{MgSO}_4$ , filtered and concentrated. Purification by column chromatography (hexane  $\rightarrow$  10% EtOAc/90% hexane) afforded 2-allyl-2-(2-methoxyphenyl)pent-4-enenitrile (1.544 g, 68%) as a yellow oil. **<sup>1</sup>H NMR** (400 MHz,  $\text{CDCl}_3$ )  $\delta$  7.44 (dd,  $J$  = 7.7, 1.6 Hz, 1H, ArH), 7.30 (ddd,  $J$  = 8.2, 7.5, 1.6 Hz, 1H, ArH), 6.99 – 6.89 (m, 2H, 2 x ArH), 6.00 – 5.39 (m, 2H, 2 x alkene CH), 5.17 – 5.03 (m, 4H, 2 x alkene  $\text{CH}_2$ ), 3.88 (s, 3H, Me), 3.03 (ddt,  $J$  = 13.9, 6.9, 1.2 Hz, 2H, 2 x CH), 2.75 (ddt,  $J$  = 13.9, 7.6, 1.0 Hz, 2H, 2 x CH). **<sup>13</sup>C NMR** (101 MHz,  $\text{CDCl}_3$ )  $\delta$  157.0 132.8, 129.5, 129.5, 124.7, 122.4, 120.9, 119.4, 111.9, 55.4, 47.4, 41.0. **ATR-IR**  $\nu_{\text{max}}$  (neat)/ $\text{cm}^{-1}$  3078, 2980, 2918, 2837, 2234, 1641, 1584, 1493, 1464, 1437, 1288, 1246, 1105, 1024, 991, 920, 787, 752, 606. **m/z (EI):** 227.1 ( $M^+$ , 17%), 186.1 (100), 171.1 (25), 155.1 (20), 144.1 (40), 127.1 (21), 115.1 (42), 102.1 (8), 89.0 (18), 77.1 (16), 63.0 (11), 51.0 (10). The data are consistent with those previously reported in the literature<sup>5</sup>

2-Allyl-2-(2-methoxyphenyl)pent-4-enenitrile (1.0 eq., 1.5 mmol, 341 mg) and dry toluene (15 mL) were sealed in a microwave vial in a nitrogen-filled glovebox. PhLi as a 1.56 M solution in dibutyl ether (1.05 eq., 1.56 mmol, 1.00 mL) was added dropwise at – 78 °C and the reaction mixture was stirred at – 78 °C for 1 h before it was warmed up to room temperature and stirred for an additional 1 h. The reaction mixture was then heated to 100 °C and stirred at that temperature for 13 h. The contents of the microwave vial were cooled to room temperature and were quenched with sat.  $\text{NH}_4\text{Cl}$  (50 mL). The organic products were extracted into  $\text{Et}_2\text{O}$  (3 x 50 mL). The combined organic layers were dried over  $\text{Na}_2\text{SO}_4$ , filtered and concentrated. Purification by column chromatography (hexane  $\rightarrow$  2% EtOAc/98% hexane) afforded 3,3-diallyl-2-phenyl-3*H*-indole **82** (228 mg, 55%) as a yellow solid and 3-allyl-2-phenyl-1*H*-indole (27 mg, 8%) as a yellow solid.



3,3-Diallyl-2-phenyl-3*H*-indole: **Mp** = 51-52 °C (no lit. mp). <sup>1</sup>**H NMR** (400 MHz, CDCl<sub>3</sub>) δ 8.12 (m, 2H, 2 x ArH), 7.70 – 7.65 (d, *J* = 7.7 Hz, 1H, ArH), 7.50 – 7.46 (m, 3H, 3 x ArH), 7.38 – 7.32 (m, 2H, 2 x ArH), 7.30 – 7.25 (m, 1H, ArH), 5.12 (ddt, *J* = 17.2, 10.1, 7.2 Hz, 2H, 2 x alkene CH), 4.82 – 4.69 (m, 4H, 2 x alkene CH<sub>2</sub>), 2.94 – 2.87 (m, 4H). <sup>13</sup>**C NMR** (101 MHz, CDCl<sub>3</sub>) δ 180.4, 154.7, 143.1, 134.2, 132.0, 130.7, 128.7, 128.2, 128.2, 125.8, 121.9, 120.9, 118.3, 62.5, 41.9. **ATR-IR**  $\nu_{\text{max}}$  (neat)/cm<sup>-1</sup> 3071, 3003, 2951, 2887, 1638, 1522, 1493, 1454, 1441, 1416, 1344, 1261, 1217, 1113, 1072, 995, 961, 918, 868, 785, 756, 723, 692, 675, 635, 619, 610. **m/z** (**EI**): 271.1 (M<sup>+</sup>, 100%), 246.1 (29), 232.1 (78), 217.0 (41), 204.1 (25), 154.0 (14), 128.1 (51), 115.0 (14), 103.1 (22), 77.0 (27), 51.0 (14). The data for this compound were consistent with those previously reported in the literature.<sup>5</sup>

3-Allyl-2-phenyl-1*H*-indole: **Mp** = 94-96 °C (lit. mp = 98-99 °C).<sup>11</sup> <sup>1</sup>**H NMR** (400 MHz, CDCl<sub>3</sub>) δ 8.06 (br s, 1H, NH), 7.65 – 7.61 (m, 1H, ArH), 7.60 – 7.56 (m, 2H, 2 x ArH), 7.52 – 7.45 (m, 3H, 3 x ArH), 7.41 – 7.36 (m, 2H, 2 x ArH), 7.23 (ddd, *J* = 8.3, 7.2, 1.2 Hz, 1H, ArH), 7.15 (ddd, *J* = 8.0, 7.1, 1.0 Hz, 1H, ArH), 6.15 (ddt, *J* = 16.1, 10.4, 5.6 Hz, 1H, alkene CH), 5.16 – 5.08 (m, 2H, alkene CH<sub>2</sub>), 3.65 (2 x t, *J* = 1.8 Hz, 2H, 2 x CH). <sup>13</sup>**C NMR** (101 MHz, CDCl<sub>3</sub>) δ 137.5, 136.1, 135.0, 133.1, 129.5, 129.0, 128.0, 127.8, 122.5, 119.8, 119.6, 115.3, 110.9, 110.7, 29.1. **ATR-IR**  $\nu_{\text{max}}$  (neat)/cm<sup>-1</sup> 3395, 3075, 3003, 2922, 2893, 1636, 1603, 1485, 1450, 1423, 1341, 1304, 1240, 1204, 1153, 1074, 1028, 997, 920, 764, 748, 694, 669, 629. **m/z** (**EI**): 233.1 (M<sup>+</sup>, 99%), 217.1 (29), 206.1 (100), 190.0 (4), 178.1 (16), 165.0 (5), 154.1 (13), 138.9 (4), 128.0 (25), 115.1 (8), 108.7 (26), 102.1 (18), 89.0 (8), 77.0 (32), 63.0 (12), 51.0 (21). The data for this compound were consistent with those previously reported in the literature.<sup>11</sup>

#### Preparation of 3,3-dibenzyl-2-phenyl-3*H*-indole (**83**)

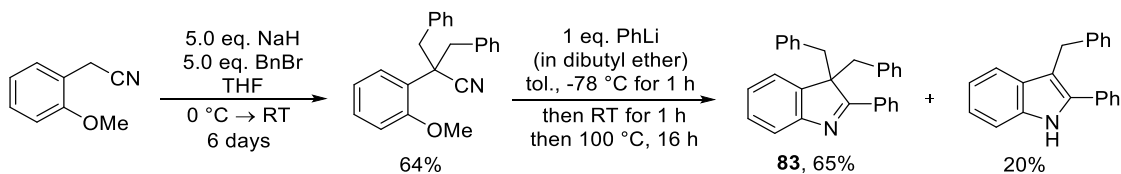

This substrate was prepared according to a modified literature procedure.<sup>5</sup> 2-Methoxyphenylacetonitrile (1.0 eq., 10.0 mmol, 1.472 g) was added portion wise to a slurry of NaH (5.0 eq., 50.0 mmol, 1.200 g) in dry THF (100 mL) at 0 °C under argon. Reaction mixture was warmed up to room temperature and was stirred for 1 h before benzyl bromide (5.0 eq., 50.0 mmol, 5.947 mL) was added. Reaction was stirred a room temperature over ~ 6 days and the reaction progress was monitored by TLC. Once all 2-methoxyphenylacetonitrile was consumed, the reaction mixture was quenched with NH<sub>4</sub>Cl (100 mL) at 0 °C. The reaction mixture was then extracted with EtOAc (3 x 50 mL). The combined organic phases were dried over MgSO<sub>4</sub>, filtered and concentrated. Purification by recrystallisation from hexane/EtOAc afforded 2-benzyl-2-(2-methoxyphenyl)-3-phenylpropanenitrile (2.089 g, 64%) as a white solid. **Mp** = 133-134 °C (lit. mp = 139 °C).<sup>12</sup> <sup>1</sup>**H NMR** (400 MHz, CDCl<sub>3</sub>) δ 7.24 (ddd, *J* = 8.2, 7.5, 1.7 Hz, 1H, ArH), 7.19 – 7.14 (m, 6H, 6 x ArH), 7.11 – 7.02 (m, 5H, 5 x ArH), 6.96 (dd, *J* = 8.2, 0.9 Hz, 1H, ArH),

6.69 (td,  $J = 7.6, 1.2$  Hz, 1H, ArH), 4.06 (s, 3H, Me), 3.83 (d,  $J = 13.4$  Hz, 2H, 2 x CH), 3.31 (d,  $J = 13.5$  Hz, 2H, 2 x CH).  $^{13}\text{C}$  NMR (101 MHz,  $\text{CDCl}_3$ )  $\delta$  156.8, 136.3, 130.8, 130.3, 129.5, 128.1, 127.1, 123.8, 122.2, 121.0, 111.4, 55.3, 52.5, 42.9. ATR-IR  $\nu_{\text{max}}$  (neat)/ $\text{cm}^{-1}$  3065, 3024, 3001, 2926, 2841, 2232, 1601, 1582, 1493, 1470, 1452, 1439, 1406, 1339, 1294, 1269, 1246, 1186, 1167, 1153, 1121, 1080, 1065, 1043, 1022, 997, 970, 934, 916, 905, 851, 841, 799, 785, 770, 750, 739, 698, 679, 658, 608.  $m/z$  (EI): 327.2 ( $\text{M}^+$ , 47%), 236.1 (86), 220.1 (11), 209.1 (8), 194.1 (32), 178.1 (6), 165.1 (20), 152.1 (4), 140.1 (1), 131.1 (3), 115.1 (4), 103.1 (3), 91.1 (100), 77.0 (5), 65.1 (18), 51.0 (3). HRMS (ESI) calcd. for  $\text{C}_{23}\text{H}_{22}\text{NO}^+$  ( $[\text{M}+\text{H}]^+$ ): 328.1696, found 328.1694.

2-Benzyl-2-(2-methoxyphenyl)-3-phenylpropanenitrile (1.0 eq., 1.5 mmol, 491 mg) and dry toluene (15 mL) were sealed in a microwave vial in a nitrogen-filled glovebox. PhLi as a 1.56 M solution in dibutyl ether (1.05 eq., 1.56 mmol, 1.00 mL) was added dropwise at  $-78$  °C and the reaction mixture was stirred at  $-78$  °C for 1 h before it was warmed up to room temperature and stirred for an additional 1 h. The reaction mixture was then heated to 100 °C and stirred at that temperature for 16 h. The contents of the microwave vial were cooled to room temperature and were quenched with sat.  $\text{NH}_4\text{Cl}$  (50 mL). The organic products were extracted into  $\text{Et}_2\text{O}$  (3 x 50 mL). The combined organic layers were dried over  $\text{Na}_2\text{SO}_4$ , filtered and concentrated. Purification by column chromatography (hexane  $\rightarrow$  3% EtOAc/98% hexane) afforded 3,3-dibenzyl-2-phenyl-3*H*-indole **83** (336 mg, 65%) as a white-off solid and 3-benzyl-2-phenyl-1*H*-indole (84 mg, 20%) as a yellow oil.

**3,3-Dibenzyl-2-phenyl-3*H*-indole:** Mp = 122-123 °C (lit. mp = 123-125 °C). $^{13}\text{H}$  NMR (400 MHz,  $\text{CDCl}_3$ )  $\delta$  8.44 – 8.17 (m, 2H, 2 x ArH), 7.62 – 7.51 (m, 3H, 3 x ArH), 7.38 – 7.29 (m, 2H, 2 x ArH), 7.30 – 7.21 (m, 2H, 2 x ArH), 6.96 (tt,  $J = 7.4, 1.5$  Hz, 2H, 2 x ArH), 6.88 (t,  $J = 7.4$  Hz, 4H, 4 x ArH), 6.64 – 6.51 (m, 4H, 4 x ArH), 3.67 (d,  $J = 13.6$  Hz, 2H, 2 x CH), 3.57 (d,  $J = 13.6$  Hz, 2H, 2 x CH).  $^{13}\text{C}$  NMR (101 MHz,  $\text{CDCl}_3$ )  $\delta$  179.0, 154.6, 142.4, 135.6, 134.6, 130.8, 129.4, 128.9, 128.7, 128.2, 127.6, 126.6, 125.2, 123.0, 120.8, 64.6, 44.1. ATR-IR  $\nu_{\text{max}}$  (neat)/ $\text{cm}^{-1}$  3084, 3061, 3028, 2943, 2926, 2859, 1599, 1584, 1520, 1493, 1468, 1454, 1441, 1354, 1344, 1263, 1248, 1213, 1186, 1179, 1155, 1111, 1082, 1022, 1001, 957, 937, 914, 860, 845, 783, 758, 696, 671, 650.  $m/z$  (EI): 373.1 ( $\text{M}^+$ , 87%), 296.1 (30), 282.1 (45), 252.1 (4), 218.1 (2), 204.1 (39), 178.0 (26), 152.0 (9), 91.0 (100), 65.0 (15), 51.0 (3). HRMS (ESI) calcd. for  $\text{C}_{28}\text{H}_{24}\text{N}^+$  ( $[\text{M}+\text{H}]^+$ ): 374.1903, found 374.1916.

**3-Benzyl-2-phenyl-1*H*-indole:**  $^1\text{H}$  NMR (400 MHz,  $\text{CDCl}_3$ )  $\delta$  8.13 (br s, 1H, NH), 7.60 – 7.49 (m, 2H, 2 x ArH), 7.48 – 7.39 (m, 4H, 4 x ArH), 7.36 (t,  $J = 7.3$  Hz, 1H, ArH), 7.31 – 7.15 (m, 6H, 6 x ArH), 7.08 (t,  $J = 7.5$  Hz, 1H, ArH), 4.29 (s, 2H,  $\text{CH}_2$ ).  $^{13}\text{C}$  NMR (101 MHz,  $\text{CDCl}_3$ )  $\delta$  141.6, 136.2, 135.6, 133.1, 129.7, 129.0, 128.5, 128.4, 128.0, 127.9, 125.9, 122.5, 119.9, 119.8, 111.3, 110.9, 30.6. ATR-IR  $\nu_{\text{max}}$  (neat)/ $\text{cm}^{-1}$  3410, 3057, 3024, 2955, 2928, 2870, 1601, 1518, 1491, 1452, 1425, 1341, 1304, 1244, 1177, 1153, 1144, 1113, 1096, 1074, 1043, 1007, 991, 955, 914, 847, 808, 764, 741, 725, 696, 669, 627, 608.  $m/z$  (EI): 283.0 ( $\text{M}^+$ , 15%), 206.0 (62), 190.9 (3), 178.0 (21), 165.0 (7), 151.9 (7), 139.9



(4), 128.0 (11), 115.0 (3), 103.0 (10), 91.0 (14), 77.0 (100), 65.0 (10), 51.0 (38). The data for this compound were consistent with those previously reported in the literature.<sup>14</sup>

#### Preparation of 2,3,3-triphenyl-3*H*-indole (**81**)

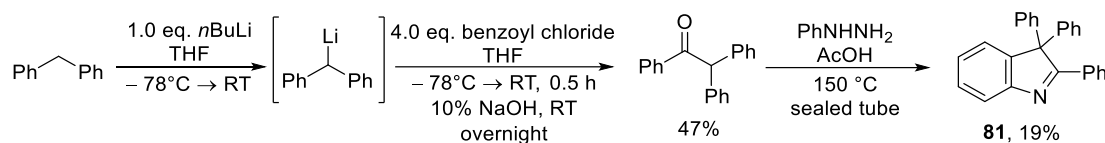

1,2,2-Triphenylethan-1-one was prepared according to a modified literature procedure.<sup>15</sup> <sup>n</sup>BuLi as a 2.2 M solution in hexanes (1.0 eq., 17.8 mmol, 8.100 mL) was added dropwise to a solution of diphenylmethane (1.0 eq., 17.8 mmol, 2.982 mL) in dry THF (20 mL) at  $-78^{\circ}\text{C}$  under argon, resulting in a deep red solution. The red benzhydryllithium solution was added dropwise to a solution of benzoyl chloride (4.0 eq., 71.2 mmol, 8.258 mL) in dry THF (25 mL) at  $-78^{\circ}\text{C}$  under argon, resulting in immediate quenching of the red colour. Reaction mixture was warmed to room temperature and stirred at room temperature for 30 min before it was carefully poured onto ice-cold 10% NaOH solution (100 mL). The resulting biphasic mixture was vigorously stirred at room temperature overnight. The mixture was then extracted with Et<sub>2</sub>O/EtOAc mixture three times and the combined organic phases were dried over MgSO<sub>4</sub>, filtered and concentrated. Recrystallisation from CH<sub>2</sub>Cl<sub>2</sub>/hexane afforded 1,2,2-triphenylethan-1-one (2.254 g, 47%) as a white powder. **mp** = 129-131  $^{\circ}\text{C}$  (lit. mp = 135-136  $^{\circ}\text{C}$ ).<sup>15</sup> **<sup>1</sup>H NMR** (400 MHz, CDCl<sub>3</sub>)  $\delta$  8.00 (d,  $J$  = 7.1 Hz, 2H, 2 x ArH), 7.51 (t,  $J$  = 7.4 Hz, 1H, ArH), 7.41 (t,  $J$  = 7.6 Hz, 2H, 2 x ArH), 7.36 – 7.22 (m, 10H, 10 x ArH), 6.04 (s, 1H, CH). **<sup>13</sup>C NMR** (101 MHz, CDCl<sub>3</sub>)  $\delta$  198.3, 139.2, 137.0, 133.2, 129.3, 129.1, 128.9, 128.8, 127.3, 59.6. **ATR-IR**  $\nu_{\text{max}}$  (neat)/cm<sup>-1</sup> 3084, 3059, 3026, 2916, 1678, 1593, 1578, 1493, 1447, 1356, 1304, 1273, 1233, 1206, 1180, 1169, 1076, 1032, 1013, 997, 858, 827, 764, 739, 692, 681, 669, 611. ***m/z* (EI)**: 272.0 (M<sup>+</sup>, 1%), 165.1 (48), 152.1 (14), 139.1 (3), 128.0 (2), 115.0 (4), 105.1 (100), 89.0 (3), 77.0 (53), 63.0 (1), 51.0 (17). The data for this compound were consistent with those previously reported in the literature.<sup>16</sup>

A solution of 1,2,2-triphenylethanone (1.0 eq., 7.0 mmol, 1.906 g) and phenylhydrazine (1.0 eq., 7.0 mmol, 690  $\mu\text{L}$ ) in AcOH (10 mL) was refluxed overnight under argon. A further portion of phenylhydrazine (1.0 eq., 7.0 mmol, 690  $\mu\text{L}$ ) was added and the reaction mixture was refluxed overnight. An additional portion of phenylhydrazine (1.0 eq., 7.0 mmol, 690  $\mu\text{L}$ ) was added and the reaction mixture was further refluxed overnight. The reaction mixture was then cooled to RT and transferred into a microwave vial. A further portion of phenylhydrazine (0.73 eq., 5.0 mmol, 500  $\mu\text{L}$ ) was added and the reaction mixture was sealed in a nitrogen-filled glovebox. The reaction mixture was stirred at 150  $^{\circ}\text{C}$  overnight outside the glovebox. Two further charges of phenylhydrazine (0.73 eq., 5.0 mmol, 2 x 500  $\mu\text{L}$ ) were added portion wise over a few hours and the reaction mixture was stirred at 150  $^{\circ}\text{C}$  overnight. The reaction mixture was cooled to room temperature, poured onto sat. Na<sub>2</sub>CO<sub>3</sub> (100 mL) and extracted into CH<sub>2</sub>Cl<sub>2</sub> (4 x 40 mL). The combined organic phases were dried over MgSO<sub>4</sub>,

filtered and concentrated. Two purifications by column chromatography (hexane → 10% EtOAc/90% hexane, followed by hexane → toluene) afforded 2,3,3-triphenyl-3*H*-indole **81** (457 mg, 19%) as yellow needles. **Mp** = 138-141 °C (lit. mp = 153 °C). <sup>1</sup>**H** NMR (400 MHz, CDCl<sub>3</sub>) δ 7.97 – 7.91 (m, 2H, 2 x ArH), 7.78 (d, *J* = 7.7 Hz, 1H, ArH), 7.39 – 7.18 (m, 15H, 15 x ArH), 7.15 (td, *J* = 7.4, 1.0 Hz, 1H, ArH). <sup>13</sup>**C** NMR (101 MHz, CDCl<sub>3</sub>) δ 181.5, 153.9, 148.5, 140.0, 133.2, 130.6, 129.6, 128.7, 128.3, 128.1, 127.4, 126.7, 123.8, 121.4, 71.9 (one signal missing due to peak overlap). **ATR-IR** ν<sub>max</sub> (neat)/cm<sup>-1</sup> 3057, 3024, 2980, 1595, 1524, 1489, 1454, 1443, 1341, 1315, 1290, 1261, 1240, 1223, 1179, 1155, 1144, 1101, 1078, 1022, 1003, 976, 968, 930, 910, 885, 868, 831, 783, 768, 746, 692, 673, 654, 631. **m/z** (**EI**): 345.2 (M<sup>+</sup>, 100%), 267.1 (5), 241.1 (40), 226.1 (7), 215.1 (5), 165.1 (22), 133.6 (3), 119.6 (3), 103.1 (4), 77.1 (4), 51.1 (3). **HRMS** (**ESI**) calcd. for C<sub>26</sub>H<sub>20</sub>N<sup>+</sup> ([M+H]<sup>+</sup>): 346.1590, found 346.1597.

## Optimisation of the reaction conditions

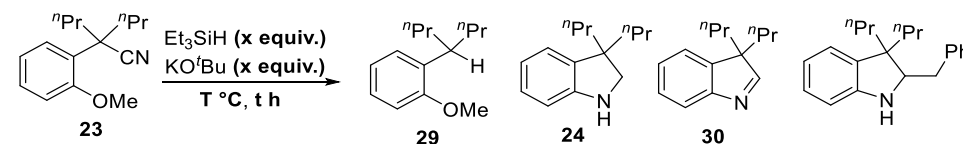

| Entry | <i>T</i> /°C | <i>t</i> /h | Silane                           | Base                | <i>x</i> | Solvent | <b>24</b> /% | <b>29</b> /% | <b>30</b> /% | <b>23</b> /% |
|-------|--------------|-------------|----------------------------------|---------------------|----------|---------|--------------|--------------|--------------|--------------|
| 1     | 130          | 18          | Et <sub>3</sub> SiH              | KO <sup>t</sup> Bu  | 3        | None    | 32           | -            | -            | -            |
| 2     | 90           | 18          | Et <sub>3</sub> SiH              | KO <sup>t</sup> Bu  | 3        | None    | 59           | 20           | -            | -            |
| 3     | rt           | 18          | Et <sub>3</sub> SiH              | KO <sup>t</sup> Bu  | 3        | None    | 5            | -            | 2            | [a]          |
| 4     | 60           | 18          | Et <sub>3</sub> SiH              | KO <sup>t</sup> Bu  | 3        | None    | 60           | 1            | -            | Trace        |
| 5     | 40           | 18          | Et <sub>3</sub> SiH              | KO <sup>t</sup> Bu  | 3        | None    | 36           | 15           | Trace        | 18           |
| 6     | 70           | 18          | Et <sub>3</sub> SiH              | KO <sup>t</sup> Bu  | 3        | None    | 72           | 11           | -            | Trace        |
| 7     | 80           | 18          | Et <sub>3</sub> SiH              | KO <sup>t</sup> Bu  | 3        | None    | 66           | 12           | -            | Trace        |
| 8     | 70           | 6           | Et <sub>3</sub> SiH              | KO <sup>t</sup> Bu  | 3        | None    | 38           | 8            | -            | 10           |
| 9     | 70           | 18          | Et <sub>3</sub> SiH              | LiO <sup>t</sup> Bu | 3        | None    | -            | -            | -            | 95           |
| 10    | 70           | 18          | Et <sub>3</sub> SiH              | NaO <sup>t</sup> Bu | 3        | None    | -            | -            | -            | 93           |
| 11    | 70           | 18          | Et <sub>3</sub> SiH              | KHMDS               | 3        | None    | -            | -            | -            | 81           |
| 12    | 70           | 18          | Et <sub>3</sub> SiH              | KOH                 | 3        | None    | -            | -            | -            | 85           |
| 13    | 70           | 18          | Et <sub>3</sub> SiH              | KOEt                | 3        | None    | -            | -            | -            | 68           |
| 14    | 70           | 18          | Et <sub>3</sub> SiH              | Et <sub>3</sub> N   | 3        | None    | -            | -            | -            | 66           |
| 15    | 70           | 18          | Et <sub>3</sub> SiH              | NaH                 | 3        | None    | -            | -            | -            | 97           |
| 16    | 70           | 18          | Et <sub>3</sub> SiH              | KH                  | 3        | None    | 12           | -            | -            | 63           |
| 17    | 70           | 18          | Et <sub>3</sub> SiH              | KO <sup>t</sup> Bu  | 3        | THF     | 42           | 34           | 1            | -            |
| 18    | 70           | 18          | Et <sub>3</sub> SiH              | KO <sup>t</sup> Bu  | 3        | dioxane | 63           | 6            | 6            | Trace        |
| 19    | 70           | 18          | Et <sub>3</sub> SiH              | KO <sup>t</sup> Bu  | 3        | Toluene | 53           | 25           | -            | Trace        |
| 20    | 70           | 18          | Et <sub>3</sub> SiH              | KO <sup>t</sup> Bu  | 3        | Hexane  | 44           | Trace        | -            | 13           |
| 21    | 70           | 18          | Et <sub>3</sub> SiH              | KO <sup>t</sup> Bu  | 4        | None    | 69           | 16           | -            | Trace        |
| 22    | 70           | 18          | Et <sub>3</sub> SiH              | KO <sup>t</sup> Bu  | 2        | None    | 56           | 20           | -            | [b]          |
| 23    | 70           | 18          | Me <sub>2</sub> PhSiH            | KO <sup>t</sup> Bu  | 3        | None    | 55           | -            | -            | -            |
| 24    | 70           | 18          | MePh <sub>2</sub> SiH            | KO <sup>t</sup> Bu  | 3        | None    | 57           | -            | -            | -            |
| 25    | 70           | 18          | Ph <sub>3</sub> SiH              | KO <sup>t</sup> Bu  | 3        | None    | 55           | -            | -            | -            |
| 26    | 70           | 18          | <sup>i</sup> Pr <sub>3</sub> SiH | KO <sup>t</sup> Bu  | 3        | None    | -            | -            | -            | 98 [c]       |

[a] contains an inseparable mixture of **23** and an aldehyde by-product (total mass = 66 mg, 0.16:1 aldehyde:**23**). The mass of **23** at the start of the reaction was 116 mg.

<sup>[b]</sup> contains an inseparable mixture of **23** and an aldehyde by-product (total mass = 24 mg, 0.12:1 aldehyde:**23**). The mass of **23** at the start of the reaction was 116 mg.

<sup>[c]</sup> Yield determined by <sup>1</sup>H NMR using 1,3,5-trimethoxybenzene as an internal standard

To a pressure tube in the glovebox, under nitrogen, was added 2-(2-methoxyphenyl)-2-propylpentanenitrile (116 mg, 0.5 mmol, 1 equiv.), triethylsilane [(0.16 mL, 1 mmol, 2 equiv.) or (0.24 mL, 1.5 mmol, 3 equiv.) or (0.32 mL, 2 mmol, 4 equiv.)] or Me<sub>2</sub>PhSiH (0.23 mL, 1.5 mmol, 3 equiv.) or MePh<sub>2</sub>SiH (0.30 mL, 1.5 mmol, 3 equiv.) or Ph<sub>3</sub>SiH (0.39 mL, 1.5 mmol, 3 equiv.) or <sup>t</sup>Pr<sub>3</sub>SiH (0.31 mL, 1.5 mmol, 3 equiv.), and the appropriate base {[potassium *tert*-butoxide (112 mg, 1 mmol, 2 equiv.) or (168 mg, 1.5 mmol, 3 equiv.) or (224 mg, 2 mmol, 4 equiv.)], or lithium *tert*-butoxide (120 mg, 1.5 mmol, 3 equiv.), or sodium *tert*-butoxide (144 mg, 1.5 mmol, 3 equiv.), or KHMDS (299 mg, 1.5 mmol, 3 equiv.), or potassium hydroxide (84 mg, 1.5 mmol, 3 equiv.), or potassium ethoxide (126 mg, 1.5 mmol, 3 equiv.), or triethylamine (0.21 mL, 1.5 mmol, 3 equiv.) or sodium hydride (36 mg, 1.5 mmol, 3 equiv.) or potassium hydride (60 mg, 1.5 mmol, 3 equiv.)}] with the appropriate solvent [no solvent, or THF (1 mL), 1,4-dioxane (1 mL), toluene (1 mL) or hexane (1 mL)]. The tube was sealed, removed from the glovebox and stirred at the appropriate temperature [room temperature, 40 °C, 60 °C, 70 °C, 80 °C, 90 °C or 130 °C] for the appropriate time [6 h or 18 h]. After cooling to room temperature, the reaction mixture was quenched by addition of water (50 mL). The products were extracted into diethyl ether (3 x 50 mL) and the combined organic layers were dried over a hydrophobic frit and concentrated under reduced pressure. Column chromatography (cyclohexane:ethyl acetate, 100:0 → 4:1) afforded 1-(heptan-4-yl)-2-methoxybenzene **29** as a colourless oil in the yields shown above. <sup>1</sup>H NMR (400 MHz, CDCl<sub>3</sub>) 0.85 (t, *J* = 7.3 Hz, 6 H, 2 x CH<sub>3</sub>), 1.08 - 1.30 (m, 4 H, 2 x CH<sub>2</sub>), 1.50 - 1.63 (m, 4 H, 2 x CH<sub>2</sub>), 3.07 - 3.20 (m, 1 H, CH), 3.81 (s, 3 H, OCH<sub>3</sub>), 6.86 (d, *J* = 8.3 Hz, 1 H, ArH), 6.92 (td, *J* = 7.3, 1.0 Hz, 1 H, ArH), 7.11 - 7.18 (m, 2 H, 2 x ArH). <sup>13</sup>C NMR (101 MHz, CDCl<sub>3</sub>) 14.2, 20.6, 36.8, 38.2, 55.5, 110.6, 120.5, 126.3, 127.5, 134.7, 157.7. ATR-IR ν<sub>max</sub> (neat)/cm<sup>-1</sup> 2953, 2854, 1598, 1500, 1462, 1375, 1236, 1049, 881, 738. *m/z* (EI): 206.2 (M<sup>+</sup>, 59), 163.2 (60), 147.2 (6), 134.1 (10), 121.2 (100), 103.1 (13), 91.1 (93), 77.1 (26), 65.1 (24), 51.1 (7). HRMS (CI) calcd. for C<sub>14</sub>H<sub>23</sub>O<sup>+</sup> ([M+H]<sup>+</sup>): 207.1749, found: 207.1745. Also isolated was recovered starting material **23**, with data consistent with those reported above. Also isolated was 3,3-dipropylindoline **24** as a colourless oil, with data consistent with those reported below. Also isolated was 3,3-dipropyl-3*H*-indole **30** as a colourless oil. <sup>1</sup>H NMR (400 MHz, CDCl<sub>3</sub>) 0.78 (t, *J* = 6.9 Hz, 6 H, 2 x CH<sub>3</sub>), 0.83 - 0.92 (m, 2 H, 2 x CH), 0.98 - 1.12 (m, 2 H, 2 x CH), 1.70 - 1.92 (m, 4 H, 2 x CH<sub>2</sub>), 7.22 - 7.27 (m, 2 H, 2 x ArH), 7.30 - 7.37 (m, 1 H, ArH), 7.62 (d, *J* = 7.3 Hz, 1 H, ArH), 8.03 (s, 1 H, CHN). <sup>13</sup>C NMR (101 MHz, CDCl<sub>3</sub>) 14.5, 17.7, 37.6, 62.4, 121.0, 121.8, 125.9, 127.5, 142.5, 155.8, 179.3. ATR-IR ν<sub>max</sub> (neat)/cm<sup>-1</sup> 2957, 2931, 2871, 1556, 1455, 1378, 1295, 1201, 1014, 937, 773, 753. HRMS (CI) calcd. for C<sub>14</sub>H<sub>20</sub>N<sup>+</sup> ([M+H]<sup>+</sup>): 202.1596, found: 202.1601.

When toluene was used as the solvent, 2-benzyl-3,3-dipropylindoline was also isolated as a white solid (17 mg, 12%). **Mp** = 85-86 °C. **<sup>1</sup>H NMR** (400 MHz, CDCl<sub>3</sub>) 0.90 (t, *J* = 6.9 Hz, 3 H, CH<sub>3</sub>), 0.94 (t, *J* = 7.1 Hz, 3 H, CH<sub>3</sub>), 1.22 - 1.49 (m, 5 H, 2 x CH<sub>2</sub> + CH), 1.65 - 1.84 (m, 3 H, CH + CH<sub>2</sub>), 2.76 (dd, *J* = 13.2, 11.3 Hz, 1 H, CH), 2.92 (dd, *J* = 13.2, 3.0 Hz, 1 H, CH), 3.78 (dd, *J* = 11.3, 2.5 Hz, 1 H, CH), 6.54 (d, *J* = 7.8 Hz, 1 H, ArH), 6.71 (td, *J* = 7.3, 1.0 Hz, 1 H, ArH), 6.91 - 7.08 (m, 2 H, 2 x ArH), 7.22 - 7.30 (m, 3 H, 3 x ArH), 7.30 - 7.38 (m, 2 H, 2 x ArH). **<sup>13</sup>C NMR** (101 MHz, CDCl<sub>3</sub>) 14.8, 15.0, 17.5, 17.9, 35.8, 36.5, 38.7, 49.9, 69.2, 109.3, 118.1, 124.0, 126.4, 127.1, 128.7, 129.1, 135.6, 140.2, 149.6. **ATR-IR**  $\nu_{\text{max}}$  (neat)/cm<sup>-1</sup> 3370, 3026, 2958, 2927, 1604, 1462, 1452, 1356, 1237, 1073, 847, 764, 740, 694, 591. **HRMS (CI)** calcd. for C<sub>21</sub>H<sub>28</sub>N<sup>+</sup> ([M+H]<sup>+</sup>): 294.2222, found: 294.2230.

## Treatment of substrates

Treatment of 2-phenyl-2-propylpentanenitrile (**18**) with Et<sub>3</sub>SiH/KO<sup>t</sup>Bu

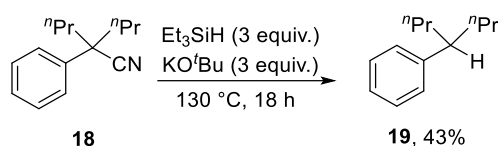

This reaction was carried out according to **General Procedure A** from **18** (101 mg, 0.5 mmol, 1 equiv.). Purification by column chromatography (hexane) afforded 4-phenylheptane **19** which was inseparable from some silyl-derived by-products. This crude mixture was then dissolved in diethyl ether (3 mL) and conc. HCl (3 mL) added. This mixture was stirred at room temperature for 48 h under air before diluting with water and extracting into hexane. The combined organic layers were washed with NaHCO<sub>3</sub>, dried over Na<sub>2</sub>SO<sub>4</sub>, filtered and concentrated to afford 4-phenylheptane **19** as a colourless oil (38 mg, 43%) **<sup>1</sup>H NMR** (400 MHz, CDCl<sub>3</sub>) 0.86 (t, *J* = 7.3 Hz, 6 H, 2 x CH<sub>3</sub>), 1.11 - 1.25 (m, 4 H, 2 x CH<sub>2</sub>), 1.48 - 1.70 (m, 4 H, 2 x CH<sub>2</sub>), 2.47 - 2.59 (m, 1 H, CH), 7.11 - 7.22 (m, 3 H, 3 x ArH), 7.26 - 7.33 (m, 2 H, 2 x ArH). **<sup>13</sup>C NMR** (101 MHz, CDCl<sub>3</sub>) 14.1, 20.7, 39.2, 45.5, 125.7, 127.7, 128.1, 146.3. **ATR-IR**  $\nu_{\text{max}}$  (neat)/cm<sup>-1</sup> 2953, 2924, 2870, 1610, 1492, 1452, 1377, 1099, 1066, 1029, 1008, 759, 731, 665. ***m/z* (EI)**: 176.2 (M<sup>+</sup>, 13), 133.1 (25), 91.1 (100). **HRMS (CI)** calcd. for C<sub>13</sub>H<sub>20</sub><sup>+</sup> (M<sup>+</sup>): 176.1560, found: 176.1562.

Treatment of 2-phenyl-2-propylpentanenitrile (**18**) with KO<sup>t</sup>Bu

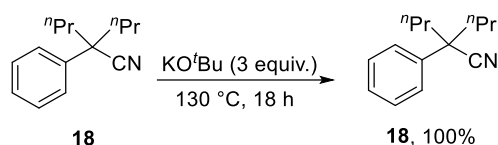

This reaction was carried out according to **General Procedure B** from **18** (101 mg, 0.5 mmol, 1 equiv.). No reaction was found to occur, and **18** was recovered with data consistent with those reported above (101 mg, 100%).

### Treatment of 2-(2-methoxyphenyl)-2-propylpentanenitrile (**23**) with Et<sub>3</sub>SiH/KO<sup>t</sup>Bu

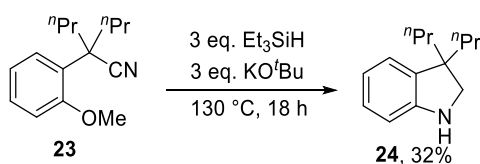

This reaction was carried out according to **General Procedure A** from **23** (116 mg, 0.5 mmol, 1 equiv.). Purification by column chromatography (hexane:diethyl ether, 100:0 → 9:1) afforded 3,3-dipropylindoline **24** as a colourless oil (33 mg, 32%). **<sup>1</sup>H NMR** (400 MHz, CDCl<sub>3</sub>) 0.89 (t, *J* = 7.3 Hz, 6 H, 2 x CH<sub>3</sub>), 1.11 - 1.25 (m, 2 H, 2 x CH), 1.27 - 1.47 (m, 2 H, 2 x CH), 1.55 (ddd, *J* = 13.7, 12.2, 4.4 Hz, 2 H, 2 x CH), 1.68 (ddd, *J* = 13.7, 12.2, 4.4 Hz, 2 H, 2 x CH), 3.37 (s, 2 H, CH<sub>2</sub>), 6.62 (d, *J* = 7.8 Hz, 1 H, ArH), 6.72 (td, *J* = 7.3, 1.0 Hz, 1 H, ArH), 6.99 (dd, *J* = 7.3, 1.0 Hz, 1 H, ArH), 7.03 (td, *J* = 7.3, 1.5 Hz, 1 H, ArH). **<sup>13</sup>C NMR** (101 MHz, CDCl<sub>3</sub>) 14.8, 17.6, 41.3, 48.8, 57.6, 109.4, 118.2, 123.3, 127.2, 136.0, 151.1. **ATR-IR** *v*<sub>max</sub> (neat)/cm<sup>-1</sup> 3383, 2953, 2927, 2868, 1604, 1487, 1462, 1377, 1311, 1232, 1180, 1151, 1116, 1028, 896, 707. ***m/z* (EI)**: 203.2 (M<sup>+</sup>, 13) 160.2 (100), 144.1 (3), 130.1 (27), 118.1 (55), 103.1 (4), 91.1 (9), 77.1 (5), 65.1 (2), 51.1 (2). **HRMS (CI)** calcd. for C<sub>14</sub>H<sub>22</sub>N<sup>+</sup> ([M+H]<sup>+</sup>): 204.1747, found: 204.1745.

### Treatment of 2-(2-methoxyphenyl)-2-propylpentanenitrile (**23**) with KO<sup>t</sup>Bu

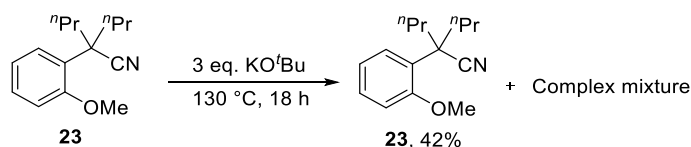

This reaction was carried out according to **General Procedure B** from **23** (116 mg, 0.5 mmol, 1 equiv.). Purification by column chromatography (hexane:diethyl ether, 100:0 → 9:1) afforded a complex mixture of products from which nothing could be identified (19 mg), and starting material **23**, with data consistent with those reported above (49 mg, 42%).

### Treatment of 2-(2-fluorophenyl)-2-propylpentanenitrile (**32**) with Et<sub>3</sub>SiH/KO<sup>t</sup>Bu

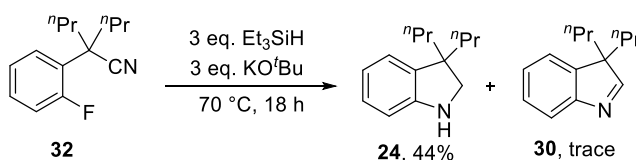

To a pressure tube in the glovebox, under nitrogen, was added 2-(2-fluorophenyl)-2-propylpentanenitrile **32** (110 mg, 0.5 mmol, 1 equiv.), triethylsilane (0.24 mL, 1.5 mmol, 3 equiv.), and potassium *tert*-butoxide (168 mg, 1.5 mmol, 3 equiv.). The tube was sealed, removed from the glovebox and stirred at 70 °C for 18 h. After cooling to room temperature, the reaction mixture was quenched by addition of water (50 mL). The products were extracted into diethyl ether (3 x 50 mL) and the combined

organic layers were dried over a hydrophobic frit and concentrated under reduced pressure. Purification by column chromatography (cyclohexane:ethyl acetate, 100:0 → 4:1) afforded, in order of elution, 3,3-dipropylindoline **24** as a colourless oil, with data consistent with those reported above (45 mg, 44%), and 3,3-dipropyl-3*H*-indole **30** as a colourless oil, with data consistent with those reported above (<1 mg).

#### Treatment of 2-(2-chlorophenyl)-2-propylpentanenitrile (**33**) with Et<sub>3</sub>SiH/KO<sup>t</sup>Bu

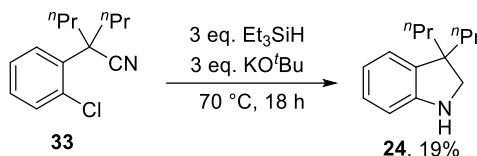

To a pressure tube in the glovebox, under nitrogen, was added 2-(2-chlorophenyl)-2-propylpentanenitrile **33** (118 mg, 0.5 mmol, 1 equiv.), triethylsilane (0.24 mL, 1.5 mmol, 3 equiv.), and potassium *tert*-butoxide (168 mg, 1.5 mmol, 3 equiv.). The tube was sealed, removed from the glovebox and stirred at 70 °C for 18 h. After cooling to room temperature, the reaction mixture was quenched by addition of water (50 mL). The products were extracted into diethyl ether (3 x 50 mL) and the combined organic layers were dried over a hydrophobic frit and concentrated under reduced pressure. Purification by column chromatography (cyclohexane:ethyl acetate, 100:0 → 4:1) afforded 3,3-dipropylindoline **24** as a colourless oil, with data consistent with those reported above (19 mg, 19%).

#### Treatment of 2-(2-bromophenyl)-2-propylpentanenitrile (**34**) with Et<sub>3</sub>SiH/KO<sup>t</sup>Bu

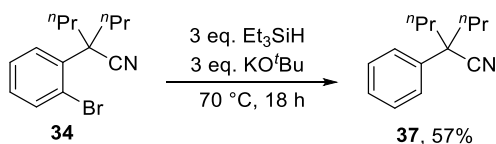

To a pressure tube in the glovebox, under nitrogen, was added 2-(2-bromophenyl)-2-propylpentanenitrile **34** (140 mg, 0.5 mmol, 1 equiv.), triethylsilane (0.24 mL, 1.5 mmol, 3 equiv.), and potassium *tert*-butoxide (168 mg, 1.5 mmol, 3 equiv.). The tube was sealed, removed from the glovebox and stirred at 70 °C for 18 h. After cooling to room temperature, the reaction mixture was quenched by addition of water (50 mL). The products were extracted into diethyl ether (3 x 50 mL) and the combined organic layers were dried over a hydrophobic frit and concentrated under reduced pressure. Purification by column chromatography (hexane) afforded an inseparable mixture of compounds from which **37** could be identified as the major component, with data consistent with those reported above. The addition of 1,3,5-trimethoxybenzene (8.4 mg, 0.05 mmol, 0.1 equiv.) allowed for calculation of the yield (57%) by comparison of the integration of the methoxy groups of the internal standard (9 integral units) to the signal at 1.92 – 2.00 ppm, corresponding to 2 x CH (11.3 integral units).

### Treatment of 2-(2-iodophenyl)-2-propylpentanenitrile (**35**) with Et<sub>3</sub>SiH/KO<sup>t</sup>Bu

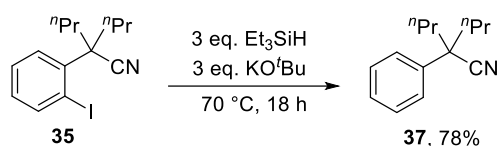

To a pressure tube in the glovebox, under nitrogen, was added 2-(2-iodophenyl)-2-propylpentanenitrile **35** (164 mg, 0.5 mmol, 1 equiv.), triethylsilane (0.24 mL, 1.5 mmol, 3 equiv.), and potassium *tert*-butoxide (168 mg, 1.5 mmol, 3 equiv.). The tube was sealed, removed from the glovebox and stirred at 70 °C for 18 h. After cooling to room temperature, the reaction mixture was quenched by addition of water (50 mL). The products were extracted into diethyl ether (3 x 50 mL) and the combined organic layers were dried over a hydrophobic frit and concentrated under reduced pressure. Purification by column chromatography (cyclohexane:ethyl acetate, 100:0 → 95:5) afforded 2-phenyl-2-propylpentanenitrile **37** (79 mg, 78%) as a colourless oil, with data consistent with those reported above.

### Treatment of 2-(2-(benzyloxy)phenyl)-2-propylpentanenitrile (**36**) with Et<sub>3</sub>SiH/KO<sup>t</sup>Bu

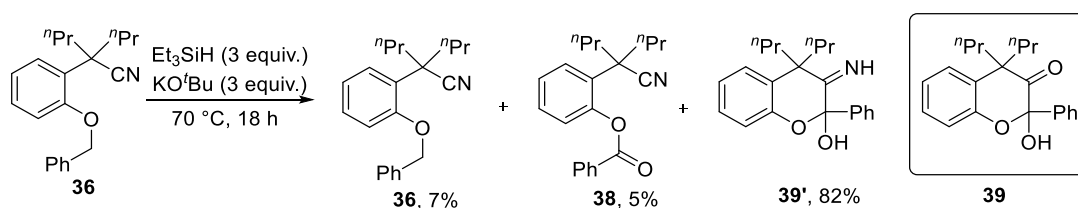

To a pressure tube in the glovebox, under nitrogen, was added 2-(2-(benzyloxy)phenyl)-2-propylpentanenitrile **36** (154 mg, 0.5 mmol, 1 equiv.), triethylsilane (0.24 mL, 1.5 mmol, 3 equiv.), and potassium *tert*-butoxide (168 mg, 1.5 mmol, 3 equiv.). The tube was sealed, removed from the glovebox and stirred at 70 °C for 18 h. After cooling to room temperature, the reaction mixture was quenched by addition of water (50 mL). The products were extracted into diethyl ether (3 x 50 mL) and the combined organic layers were dried over a hydrophobic frit and concentrated under reduced pressure. Purification by column chromatography (cyclohexane:ethyl acetate, 100:0 → 9:1) afforded recovered starting material **36** with data consistent with those reported above (10 mg, 7%), and 2-(4-cyanoheptan-4-yl)phenyl benzoate **38** as a colourless oil (8 mg, 5%). **<sup>1</sup>H NMR** (400 MHz, CDCl<sub>3</sub>) 0.88 (t, *J* = 7.3 Hz, 6 H, 2 x CH<sub>3</sub>), 1.17 - 1.31 (m, 2 H, CH<sub>2</sub>), 1.43 - 1.52 (m, 2 H, CH<sub>2</sub>), 1.93 (ddd, *J* = 13.7, 12.2, 4.4 Hz, 2 H, CH<sub>2</sub>), 2.08 (ddd, *J* = 13.7, 12.7, 4.9 Hz, 2 H, CH<sub>2</sub>), 7.18 (dd, *J* = 7.8, 1.5 Hz, 1 H, ArH), 7.30 (td, *J* = 7.2, 1.5 Hz, 1 H, ArH), 7.37 - 7.44 (m, 1 H, ArH), 7.57 (t, *J* = 7.5 Hz, 2 H, 2 x ArH), 7.64 (dd, *J* = 7.8, 1.5 Hz, 1 H, ArH), 7.67 - 7.73 (m, 1 H, ArH), 8.19 - 8.23 (m, 2 H, 2 x ArH). **<sup>13</sup>C NMR** (101 MHz, CDCl<sub>3</sub>) 13.9, 18.8, 41.1, 47.7, 122.8, 124.7, 126.2, 128.9, 129.0, 129.2, 129.4, 129.7, 130.2, 134.0, 148.2, 164.8. **ATR-IR**  $\nu_{\text{max}}$  (neat)/cm<sup>-1</sup> 2961, 2933, 2873, 2233, 1740, 1606, 1489, 1447, 1257, 1206, 1089, 1057, 1023, 756, 706, 494. **HRMS (CI)** calcd. for C<sub>21</sub>H<sub>24</sub>NO<sub>2</sub><sup>+</sup> ([M+H]<sup>+</sup>): 322.1807, found: 322.1806.



Also isolated was 3-imino-2-phenylchroman-2-ol **39'** (133 mg, 82%) as a white solid. **Mp** = 83-85 °C. **<sup>1</sup>H NMR** (400 MHz, CDCl<sub>3</sub>) 0.68 (t, *J* = 7.1 Hz, 3 H, CH<sub>3</sub>), 0.99 (t, *J* = 7.3 Hz, 3 H, CH<sub>3</sub>), 1.05 - 1.20 (m, 2 H, CH<sub>2</sub>), 1.49 - 1.70 (m, 4 H, 2 x CH<sub>2</sub>), 1.79 - 1.98 (m, 2 H, CH<sub>2</sub>), 2.43 (br s, 2 H, NH + OH), 6.87 (d, *J* = 7.8 Hz, 1 H, ArH), 6.92 (td, *J* = 7.3, 1.0 Hz, 1 H, ArH), 7.09 (dd, *J* = 7.3, 1.0 Hz, 1 H, ArH), 7.17 (td, *J* = 7.8, 1.5 Hz, 1 H, ArH), 7.39 - 7.46 (m, 2 H, 2 x ArH), 7.53 (tt, *J* = 7.3, 1.5 Hz, 1 H, ArH), 8.11 - 8.17 (m, 2 H, 2 x ArH). **<sup>13</sup>C NMR** (101 MHz, CDCl<sub>3</sub>) 14.4, 15.0, 17.1, 17.7, 35.2, 37.5, 55.2, 105.8, 110.4, 120.9, 124.5, 128.1, 128.2, 130.0, 132.4, 133.7, 137.4, 156.0, 199.5. **ATR-IR**  $\nu_{\text{max}}$  (neat)/cm<sup>-1</sup> 3070, 3028, 2958, 2931, 2871, 1695, 1648, 1595, 1477, 1456, 1225, 1102, 1010, 906, 729, 699, 463. **HRMS (CI)** calcd. for C<sub>21</sub>H<sub>26</sub>NO<sub>2</sub><sup>+</sup> ([M+H]<sup>+</sup>): 324.1958, found: 324.1966.

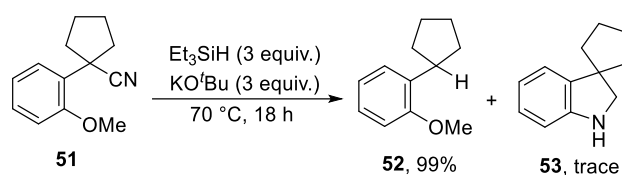



### Treatment of 1-(2-methoxyphenyl)cyclohexane-1-carbonitrile (**20**) with Et<sub>3</sub>SiH/KO<sup>t</sup>Bu

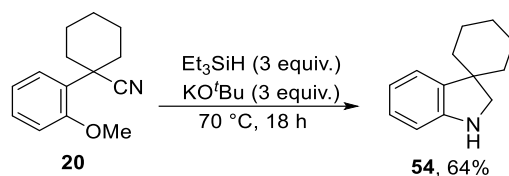

To a pressure tube in a glovebox under nitrogen was added 1-(2-methoxyphenyl)cyclohexane-1-carbonitrile **20** (108 mg, 0.5 mmol, 1 equiv.), triethylsilane (0.24 mL, 1.5 mmol, 3 equiv.) and potassium *tert*-butoxide (168 mg, 1.5 mmol, 3 equiv.). The tube was sealed, removed from the glovebox and heated at 70 °C for 18 h behind a shield. After cooling to room temperature, the mixture was quenched with water (50 mL) and extracted into diethyl ether (3 x 50 mL). The combined organic layers were dried over Na<sub>2</sub>SO<sub>4</sub>, filtered and concentrated under reduced pressure. Purification by column chromatography (hexane:ethyl acetate, 100:0 → 9:1) spiro[cyclohexane-1,3'-indoline] **54** as an orange solid (60 mg, 64%). **Mp** = 69-70 °C (lit. mp = 76-77 °C).<sup>20</sup> <sup>1</sup>H NMR (400 MHz, CDCl<sub>3</sub>) 1.23 - 1.47 (m, 3 H, 3 x CH), 1.54 - 1.67 (m, 2 H, 2 x CH), 1.67 - 1.82 (m, 5 H, 5 x CH), 3.44 (s, 2 H, NCH<sub>2</sub>), 6.65 (d, *J* = 7.6 Hz, 1 H, ArH), 6.75 (t, *J* = 7.3 Hz, 1 H, ArH), 7.04 (td, *J* = 7.6, 1.1 Hz, 1 H, ArH), 7.07 (d, *J* = 7.5 Hz, 1 H, ArH). <sup>13</sup>C NMR (101 MHz, CDCl<sub>3</sub>) 23.2, 25.8, 36.4, 46.1, 56.7, 109.6, 118.6, 122.5, 127.4, 138.4, 150.4. ATR-IR  $\nu_{\text{max}}$  (neat)/cm<sup>-1</sup> 3201, 2920, 2850, 1602, 1485, 1448, 1325, 1247, 1190, 1022, 933, 964, 871, 839, 825, 740. *m/z* (EI): 187.1 (M<sup>+</sup>, 22), 144.1 (19), 130.1 (100), 117.1 (14), 103.1 (4), 90.0 (4), 77.0 (5), 63.0 (1), 56.1 (1), 51.0 (1). The data for this compound are consistent with those previously reported in the literature.<sup>19</sup>

### Treatment of 2-(2-methoxypyridin-3-yl)-2-propylpentanenitrile (**55**) with Et<sub>3</sub>SiH/KO<sup>t</sup>Bu

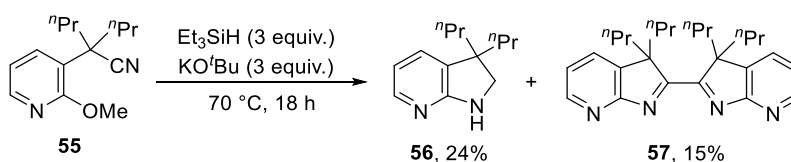

To a pressure tube in a glovebox under nitrogen was added 2-(2-methoxypyridin-3-yl)-2-propylpentanenitrile **55** (116 mg, 0.5 mmol, 1 equiv.), triethylsilane (0.24 mL, 1.5 mmol, 3 equiv.) and potassium *tert*-butoxide (168 mg, 1.5 mmol, 3 equiv.). The tube was sealed, removed from the glovebox and heated at 70 °C for 18 h behind a shield. After cooling to room temperature, the mixture was quenched with water (50 mL) and extracted into diethyl ether (3 x 50 mL). The combined organic layers were dried over Na<sub>2</sub>SO<sub>4</sub>, filtered and concentrated under reduced pressure. Purification by column chromatography (hexane:ethyl acetate, 100:0 → 7:3) afforded starting material **55** as a colourless oil, with data consistent with those reported above (23 mg, 20%) and 3,3,3',3'-tetrapropyl-3H,3'H-2,2'-bipyrrolo[2,3-b]pyridine **57** as a yellow solid (31 mg, 15%). **Mp** = 192 °C (decomposition). <sup>1</sup>H NMR (400 MHz, CDCl<sub>3</sub>) 0.58 - 0.80 (m, 20 H, 4 x CH<sub>3</sub> + 4 x CH<sub>2</sub>), 2.04 - 2.18 (m, 4 H, 4 x CH), 2.59 - 2.75 (m, 4 H, 4 x CH), 7.25 - 7.30 (m, 2 H, 2 x ArH), 7.71 (dd, *J* = 7.4, 1.6 Hz, 2 H, 2 x ArH), 8.59 (dd, *J* =

4.9, 1.6 Hz, 2 H, 2 x ArH).  $^{13}\text{C}$  NMR (101 MHz,  $\text{CDCl}_3$ ) 14.1, 17.6, 39.5, 64.2, 121.9, 130.5, 138.2, 148.7, 168.0, 181.0. **ATR-IR**  $\nu_{\text{max}}$  (neat)/ $\text{cm}^{-1}$  2958, 2927, 2870, 2285, 1581, 1462, 1392, 1226, 1134, 1054, 1029, 1014, 902, 800, 729, 623. ***m/z* (EI)**: 402.4 ( $\text{M}^+$ , 2), 373.4 (100), 360.3 (65), 331.3 (75), 317.3 (98), 301.2 (12), 287.2 (23), 271.2 (30), 259.2 (44), 201.2 (52), 173.1 (35), 159.1 (13), 144.1 (10), 130.1 (14), 117.1 (19), 104.1 (4), 92.1 (4), 77.1 (5), 65.1 (2), 51.1 (1). **HRMS (CI)** calcd. for  $\text{C}_{26}\text{H}_{35}\text{N}_4^+$  ( $[\text{M}+\text{H}]^+$ ): 403.2856, found: 403.2854.

Also isolated was 3,3-dipropyl-2,3-dihydro-1*H*-pyrrolo[2,3-*b*]pyridine **56** as a yellow semi-solid (24 mg, 24%).  $^1\text{H}$  NMR (400 MHz,  $\text{CDCl}_3$ ) 0.90 (t,  $J = 7.5$  Hz, 6 H, 2 x  $\text{CH}_3$ ), 1.12 - 1.24 (m, 2 H, 2 x CH), 1.30 - 1.40 (m, 2 H, 2 x CH), 1.51 - 1.61 (m, 2 H, 2 x CH), 1.61 - 1.71 (m, 2 H, 2 x CH), 3.40 (s, 2 H,  $\text{CH}_2\text{N}$ ), 4.50 (br s., 1 H, NH), 6.53 (dd,  $J = 7.0, 5.3$  Hz, 1 H, ArH), 7.14 (dd,  $J = 7.0, 1.5$  Hz, 1 H, ArH), 7.79 - 7.91 (m, 1 H, ArH).  $^{13}\text{C}$  NMR (101 MHz,  $\text{CDCl}_3$ ) 14.6, 17.4, 41.4, 47.4, 54.8, 113.0, 128.7, 130.4, 145.7, 163.7. **ATR-IR**  $\nu_{\text{max}}$  (neat)/ $\text{cm}^{-1}$  3224, 2956, 2927, 2870, 1654, 1608, 1463, 1421, 1249, 767, 734. ***m/z* (EI)**: 204.2 ( $\text{M}^+$ , 12), 173.1 (7), 161.1 (100), 145.1 (5), 131.1 (31), 119.1 (26), 104.1 (5), 92.0 (4), 77.0 (4), 65.0 (2), 51.0 (2). **HRMS (CI)** calcd. for  $\text{C}_{13}\text{H}_{21}\text{N}_2^+$  ( $[\text{M}+\text{H}]^+$ ): 205.1705, found: 205.1701.

#### Treatment of 2-ethyl-2-(2-methoxyphenyl)butanenitrile (**25**) with $\text{Et}_3\text{SiH}/\text{KO}^t\text{Bu}$

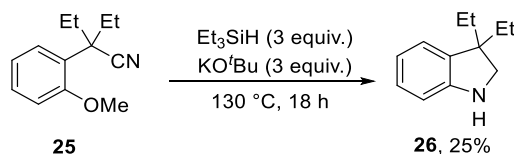

Preparation *via* **General Procedure A** from 2-ethyl-2-(2-methoxyphenyl)butanenitrile **25** (101 mg, 0.50 mmol, 1.00 eq.),  $\text{Et}_3\text{SiH}$  (240  $\mu\text{L}$ , 1.5 mmol, 3.0 eq.) and  $\text{KO}^t\text{Bu}$  (168.32 mg, 1.5 mmol, 3.0 eq.). Purification by column chromatography (0-5%  $\text{Et}_2\text{O}$ /hexane), followed by concentration under reduced pressure afforded 3,3-diethylindoline **26** as an orange/brown oil (22 mg, 25%).  $^1\text{H}$  NMR (400 MHz,  $\text{CDCl}_3$ )  $\delta$  7.04 (td,  $J = 7.6, 1.3$  Hz, 1H, ArH), 6.98 (dd,  $J = 7.4, 0.8$  Hz, 1H, ArH), 6.73 (td,  $J = 7.4, 1.0$  Hz, 1H, ArH), 6.63 (d,  $J = 7.8$  Hz, 1H, ArH), 3.36 (s, 2H,  $\text{CH}_2$ ), 1.78 - 1.68 (m, 2H,  $\text{CH}_2$ ), 1.68 - 1.58 (m, 2H,  $\text{CH}_2$ ), 0.84 (t,  $J = 7.5$  Hz, 6H, 2 x  $\text{CH}_3$ ).  $^{13}\text{C}$  NMR (101 MHz,  $\text{CDCl}_3$ )  $\delta$  151.4, 135.3, 127.2, 123.5, 118.2, 109.4, 56.8, 49.3, 30.6, 8.7. **ATR-IR**  $\nu_{\text{max}}$  (neat)/ $\text{cm}^{-1}$  3373, 2962, 2914, 2875, 2856, 1606, 1545, 1454. ***m/z* (EI)**: 175.2 ( $\text{M}^+$ , 28), 146.2 (100), 130.1 (58), 118.1 (74). The data for this compound are consistent with those previously reported in the literature.<sup>21</sup>

#### Treatment of 2-ethyl-2-(2-ethoxyphenyl)butanenitrile (**31**) with $\text{Et}_3\text{SiH}/\text{KO}^t\text{Bu}$

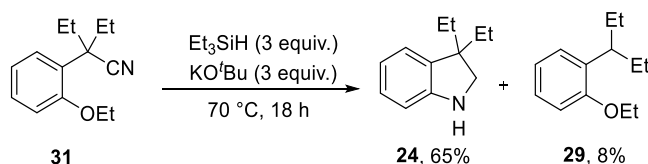

To an oven-dried pressure tube, equipped with a stirrer bar, 2-ethyl-2-(2-ethoxyphenyl) butanenitrile **31** (109 mg, 0.5 mmol, 1 equiv.) was added. The tube was taken into the glovebox, where KO<sup>t</sup>Bu (168 mg, 1.5 mmol, 3 equiv.) followed by Et<sub>3</sub>SiH (229  $\mu$ L, 1.5 mmol, 3 equiv.) was added and then sealed. The pressure tube was removed from the glovebox and heated at 70 °C for 18 h. Upon completion, the reaction was cooled to RT and quenched with water. The aqueous layer was extracted with Et<sub>2</sub>O (x 3) and the combined organic layers were dried over Na<sub>2</sub>SO<sub>4</sub>, filtered and reduced *in vacuo*. The residue was purified by column chromatography (100% hexane to 1:2 hexane:Et<sub>2</sub>O) affording 3,3-diethylindoline **24** as a yellow oil (66 mg, 65%) and 1-ethoxy-2-(pentan-3-yl)benzene **29** as a colourless oil (8 mg, 8%).

3,3-Diethylindoline: <sup>1</sup>H NMR (400 MHz, CDCl<sub>3</sub>)  $\delta$  0.83 (t, *J* = 7.5 Hz, 6H, CH<sub>3</sub>), 1.52 - 1.78 (m, 4H, CH<sub>2</sub>), 3.35 (s, 2H, CH<sub>2</sub>), 6.62 (d, *J* = 7.7, 1H, ArH), 6.67 - 6.76 (m, 1H, ArH), 6.93 - 7.01 (m, 1H, ArH), 6.98 - 7.07 (td, 1H, ArH). <sup>13</sup>C NMR (101 MHz, CDCl<sub>3</sub>)  $\delta$  8.9 (CH<sub>3</sub>), 30.7 (CH<sub>2</sub>), 49.4 (C), 56.9 (CH<sub>2</sub>), 109.5 (CH), 118.3 (CH), 123.6 (CH), 127.4 (CH), 135.4 (C), 151.6 (C). ATR-IR  $\nu_{\text{max}}$  (neat)/cm<sup>-1</sup> 3385, 1601, 1530, 1479, 1454, 1410, 1377, 1285, 1244, 1182, 1022, 739. *m/z* (EI): 175.3 (M<sup>+</sup>, 17), 146.2 (100), 130.1 (54), 118.2 (61), 103.0 (11), 90.1 (17), 77.1 (16), 63.2 (11), 51.1 (7).

1-Ethoxy-2-(pentan-3-yl)benzene: <sup>1</sup>H NMR (400 MHz, CDCl<sub>3</sub>)  $\delta$  0.78 (t, *J* = 7.4 Hz, 6H, CH<sub>3</sub>), 1.37 - 1.43 (m, 3H, CH<sub>3</sub>), 1.49 - 1.74 (m, 4H, CH<sub>2</sub>), 2.86 - 3.00 (m, 1H, CH), 4.01 (q, *J* = 7.0 Hz, 2H, CH<sub>2</sub>), 6.84 (d, *J* = 8.1 Hz, 1H, ArH), 6.90 (t, *J* = 7.4 Hz, 1H, ArH), 7.07 - 7.18 (m, 2H, ArH). <sup>13</sup>C NMR (101 MHz, CDCl<sub>3</sub>)  $\delta$  12.2 (CH<sub>3</sub>), 15.1 (CH<sub>3</sub>), 28.1 (CH<sub>2</sub>), 41.3 (CH), 63.8 (CH<sub>2</sub>), 111.7 (CH), 120.5 (CH), 126.4 (CH), 127.7 (CH), 134.4 (C), 157.4 (C). ATR-IR  $\nu_{\text{max}}$  (neat)/cm<sup>-1</sup> 1597, 1584, 1491, 1450, 1391, 1287, 1234, 1150, 1117, 1047, 924, 743. *m/z* (EI): 192.2 (M<sup>+</sup>, 27), 163.2 (88), 135.1 (72), 115.1 (20), 107.1 (100), 91.1 (55), 77.1 (27), 51.1 (7).

#### Treatment of 2-ethyl-2-(2-ethoxyphenyl)butanenitrile (**31**) with KO<sup>t</sup>Bu

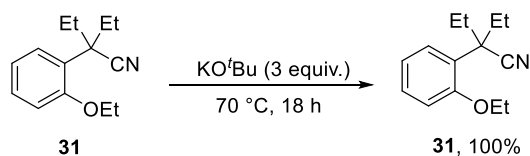

To an oven-dried pressure tube, equipped with a stirrer bar, 2-ethyl-2-(2-ethoxyphenyl) butanenitrile (109 mg, 0.5 mmol, 1 equiv.) was added. The tube was taken into the glovebox, where KO<sup>t</sup>Bu (168 mg, 1.5 mmol, 3 equiv.) was added and then sealed. The pressure tube was removed from the glovebox and heated at 70 °C for 18 h. Upon completion, the reaction was cooled to RT and quenched with water. The aqueous layer was extracted with Et<sub>2</sub>O (x 3) and the combined organic layers were dried over Na<sub>2</sub>SO<sub>4</sub>, filtered and reduced *in vacuo*. Starting material **31** was obtained as a yellow oil (109 mg, 100%). Recovered 2-(2-ethoxyphenyl)-2-ethylbutanenitrile **31** gave spectroscopic data that were consistent with those reported above.

### Treatment of 3-(2-methoxyphenyl)-2,2-dimethylpropanenitrile (**27**) with Et<sub>3</sub>SiH/KO<sup>t</sup>Bu

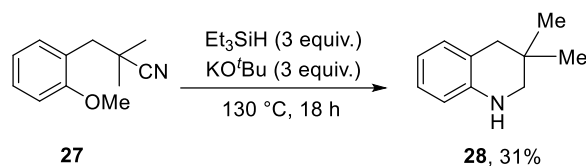

Preparation *via* **General Procedure A** from 3-(2-methoxyphenyl)-2,2-dimethylpropanenitrile **27** (95 mg, 0.50 mmol, 1.00 eq.), Et<sub>3</sub>SiH (240  $\mu$ L, 1.5 mmol, 3.0 eq.) and KO<sup>t</sup>Bu (168.32 mg, 1.5 mmol, 3.0 eq.). Purification by column chromatography (0-5% Et<sub>2</sub>O/hexane), followed by concentration under reduced pressure afforded 3,3-dimethyl-1,2,3,4-tetrahydroquinoline **28** as a colourless oil (25 mg, 31%). <sup>1</sup>H NMR (400 MHz, CDCl<sub>3</sub>)  $\delta$  7.03 – 6.97 (m, 1H, ArH), 6.95 (dd, *J* = 7.4, 0.9 Hz, 1H, ArH), 6.63 (td, *J* = 7.4, 1.1 Hz, 1H, ArH), 6.51 (dd, *J* = 8.0, 0.9 Hz, 1H, ArH), 3.87 (br s, 1H, NH), 2.94 (t, *J* = 0.8 Hz, 2H, CH<sub>2</sub>), 2.52 (s, 2H, CH<sub>2</sub>), 1.04 (s, 6H, 2 x CH<sub>3</sub>). <sup>13</sup>C NMR (101 MHz, CDCl<sub>3</sub>)  $\delta$  143.5, 130.1, 126.8, 120.7, 117.0, 113.8, 53.4, 41.3, 28.2, 26.6. ATR-IR  $\nu_{\text{max}}$  (neat)/cm<sup>-1</sup> 3358, 2954, 2901, 2862, 2853, 1606, 1527, 1455. *m/z* (EI): 161.2 (54), 146.8 (11), 137.0 (5), 121.0 (100), 114.8 (5), 108.0 (10), 103.7 (6), 98.8 (36), 91.2 (58), 82.5 (30), 77.0 (58), 70.5 (16), 65.3 (32), 56.9 (81), 50.7 (18). The data for this compound are consistent with those previously reported in the literature.<sup>22</sup>

### Treatment of 2-(2-methoxyphenyl)-2-propylpentanenitrile (**23**) with MeMgBr

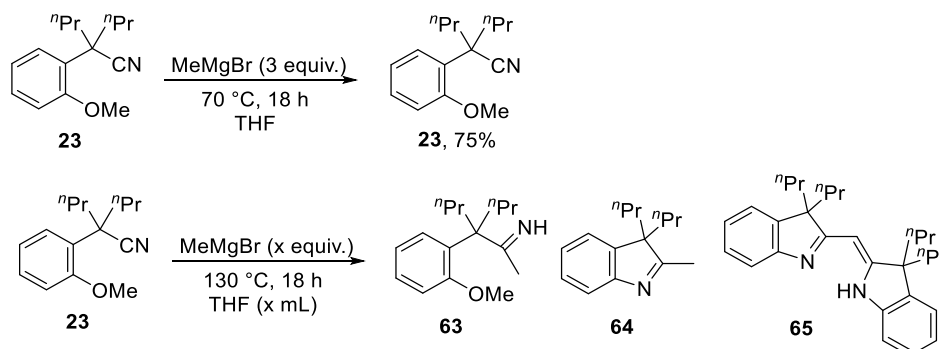

To a pressure tube in the glovebox, under nitrogen, was added 2-(2-methoxyphenyl)-2-propylpentanenitrile **23** (116 mg, 0.5 mmol, 1 equiv.) and methylmagnesium bromide (3.6 M in 2-methylTHF, 0.44 mL, 1.5 mmol, 3 equiv.) and THF (0.56 mL). The tube was sealed, removed from the glovebox and stirred at 70 °C for 18 h. After cooling to room temperature, the reaction mixture was quenched by addition of water (50 mL). The products were extracted into diethyl ether (3 x 50 mL) and the combined organic layers were dried over a hydrophobic frit and concentrated under reduced pressure. Purification by column chromatography (cyclohexane:ethyl acetate, 100:0  $\rightarrow$  9:1) afforded starting material **23** only (87 mg, 75%).

| Entry | x | <b>63</b> / % | <b>64</b> / % | <b>65</b> / % |
|-------|---|---------------|---------------|---------------|
| 1     | 3 | 40            | -             | 9             |
| 2     | 2 | 24            | -             | 4             |

|   |    |    |    |       |
|---|----|----|----|-------|
| 3 | 4  | 37 | 28 | 14    |
| 4 | 10 | 15 | 40 | Trace |

To a pressure tube in the glovebox, under nitrogen, was added 2-(2-methoxyphenyl)-2-propylpentanenitrile **23** (116 mg, 0.5 mmol, 1 equiv.) and methylmagnesium bromide [3.6 M in 2-methylTHF, [(0.28 mL, 1 mmol, 2 equiv.), or (0.42 mL, 1.5 mmol, 3 equiv.), or (0.56 mL, 2 mmol, 4 equiv.) or (1.39 mL, 10 mmol, 10 equiv.)] and THF (0.72 mL or 0.58 mL or 0.44 mL or 0 mL respectively). The tube was sealed, removed from the glovebox and stirred at 130 °C for 18 h. After cooling to room temperature, the reaction mixture was quenched by addition of water (50 mL). The products were extracted into diethyl ether (3 x 50 mL) and the combined organic layers were dried over a hydrophobic frit and concentrated under reduced pressure. Purification by column chromatography (cyclohexane:ethyl acetate, 100:0 → 0:100) afforded 2-((3,3-dipropylindolin-2-ylidene)methyl)-3,3-dipropyl-3*H*-indole **65** as a yellow solid. **Mp** = 155-158 °C. **<sup>1</sup>H NMR** (400 MHz, CDCl<sub>3</sub>) 0.65 - 0.80 (m, 16 H, 4 x CH<sub>3</sub> + 2 x CH<sub>2</sub>), 0.89 - 1.02 (m, 4 H, 2 x CH<sub>2</sub>), 1.65 - 1.76 (m, 4 H, 2 x CH<sub>2</sub>), 1.85 - 1.96 (m, 4 H, 2 x CH<sub>2</sub>), 5.08 (s, 1 H, CH), 7.01 (td, *J* = 7.1, 1.5 Hz, 2 H, 2 x ArH), 7.16 (d, *J* = 6.9 Hz, 2 H, 2 x ArH), 7.18 - 7.21 (m, 2 H, 2 x ArH), 7.21 - 7.26 (m, 2 H, 2 x ArH). **<sup>13</sup>C NMR** (101 MHz, CDCl<sub>3</sub>) 14.3, 17.4, 42.5, 58.2, 82.6, 113.4, 121.7, 121.9, 127.5, 137.8, 150.9, 174.3. **ATR-IR**  $\nu_{\text{max}}$  (neat)/cm<sup>-1</sup> 3063, 2952, 2927, 2903, 2871, 2844, 1599, 1492, 1448, 1426, 1332, 1227, 1180, 1097, 1013, 772, 745, 677. ***m/z* (EI)**: 414.4 (M<sup>+</sup>, 85), 385.3 (81), 371.3 (100), 342.3 (8), 329.2 (15), 313.2 (8), 299.2 (26), 285.1 (36), 269.1 (71), 256.1 (62), 241.1 (1), 228.1 (1), 214.2 (48), 200.2 (36), 185.2 (5), 170.1 (55), 158.1 (14), 144.1 (11), 130.1 (12), 115.5 (4), 103.1 (1), 91.1 (1), 77.1 (1), 65.1 (1), 51.1 (1). **HRMS (CI)** calcd. for C<sub>29</sub>H<sub>39</sub>N<sub>2</sub><sup>+</sup> ([M+H]<sup>+</sup>): 415.3113, found: 415.3112.

Also isolated was 2-methyl-3,3-dipropyl-3*H*-indole **64** as a colourless oil. **<sup>1</sup>H NMR** (400 MHz, CDCl<sub>3</sub>) 0.57 - 0.67 (m, 2 H) 0.70 - 0.83 (m, 8 H) 1.64 - 1.78 (m, 2 H) 1.81 - 1.95 (m, 2 H) 2.26 (s, 3 H) 7.18 - 7.24 (m, 2 H) 7.29 - 7.35 (m, 1 H) 7.54 (d, *J* = 7.5 Hz, 1 H). **<sup>13</sup>C NMR** (101 MHz, CDCl<sub>3</sub>) 14.2, 16.0, 17.0, 39.2, 62.8, 119.5, 121.6, 124.8, 127.4, 142.3, 155.0, 186.5. **ATR-IR**  $\nu_{\text{max}}$  (neat)/cm<sup>-1</sup> 2956, 2872, 2846, 1575, 1456, 1377, 756. ***m/z* (EI)**: 215.2 (M<sup>+</sup>, 39), 200.5 (5), 186.2 (68), 172.2 (38), 157.1 (28), 144.1 (100), 128.1 (12), 115.1 (20), 102.1 (9), 91.1 (9), 77.1 (9), 63.1 (3), 51.1 (3). **HRMS (CI)** calcd. for C<sub>15</sub>H<sub>22</sub>N<sup>+</sup> ([M+H]<sup>+</sup>): 216.1752, found: 216.1755.

Also isolated was 3-(2-methoxyphenyl)-3-propylhexan-2-imine **63** as a yellow oil. **<sup>1</sup>H NMR** (400 MHz, CDCl<sub>3</sub>) 0.82 - 0.98 (m, 8 H, 2 x CH<sub>3</sub> + 2 x CH), 1.04 - 1.19 (m, 2 H, 2 x CH), 1.63 - 1.79 (m, 2 H, 2 x CH), 1.82 (s, 3 H, CH<sub>3</sub>), 1.94 - 2.09 (m, 2 H, 2 x CH), 3.72 (s, 3 H, OCH<sub>3</sub>), 6.84 (dd, *J* = 8.2, 1.1 Hz, 1 H, ArH), 6.95 (td, *J* = 7.6, 1.1 Hz, 1 H, ArH), 7.21 - 7.27 (m, 1 H, ArH), 7.29 (dd, *J* = 7.8, 1.5 Hz, 1 H, ArH). **<sup>13</sup>C NMR** (101 MHz, CDCl<sub>3</sub>) 14.8, 17.4, 23.8, 34.7, 53.0, 55.0, 111.3, 120.3, 127.8, 128.0, 133.0, 157.4, 185.6. **ATR-IR**  $\nu_{\text{max}}$  (neat)/cm<sup>-1</sup> 2956, 2870, 1633, 1489, 1435, 1373, 1321, 1290, 1238, 1153,

1099, 1028, 902, 877, 846, 746. **m/z (EI):** 247.2 ( $M^+$ , 1), 216.2 (81), 206.1 (8), 174.1 (15), 163.1 (25), 144.1 (11), 131.1 (14), 121.1 (100), 115.1 (14), 105.1 (14), 91.1 (45), 77.0 (11), 65.0 (5), 55.0 (4). **HRMS (CI)** calcd. for  $C_{16}H_{26}NO^+$  ( $[M+H]^+$ ): 248.2014, found: 248.2017.

#### Treatment of 2-(2-methoxyphenyl)-2-propylpentanenitrile (**23**) with PhMgBr

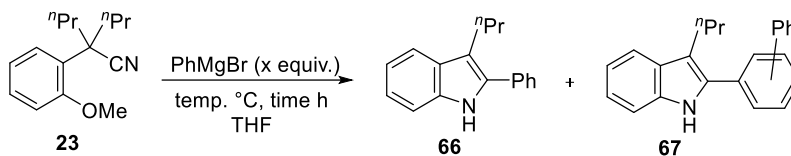

| Entry | x | Temp. / °C | Time / h | <b>66</b> / % | <b>67</b> / % | <b>23</b> / % |
|-------|---|------------|----------|---------------|---------------|---------------|
| 1     | 3 | 130        | 18       | 30            | 30            | 2             |
| 2     | 2 | 130        | 18       | 28            | 22            | 5             |
| 3     | 1 | 130        | 18       | 7             | 5             | 52            |
| 4     | 2 | 130        | 6        | 6             | 3             | 78            |
| 5     | 2 | 100        | 18       | 3             | 3             | 87            |

To a pressure tube in the glovebox under nitrogen was added 2-(2-methoxyphenyl)-2-propylpentanenitrile **23** (116 mg, 0.5 mmol, 1 equiv.) and phenylmagnesium bromide [1 M in THF, (1.5 mL, 1.5 mmol, 3 equiv.) or (1 mL, 1 mmol, 2 equiv.) or (0.5 mL, 0.5 mmol, 1 equiv.)] and THF (0 mL, 0.5 mL or 1 mL respectively). The tube was removed and stirred at the appropriate temperature (100 °C or 130 °C) for the appropriate time (6 h or 18 h) behind a shield. After cooling to room temperature, the mixture was quenched with water (50 mL) and extracted into diethyl ether (3 x 50 mL). The combined organic layers were dried over a hydrophobic frit and concentrated under reduced pressure. 1,3,5-Trimethoxybenzene (8.4 mg, 0.05 mmol, 0.1 equiv.) was added as an internal standard to determine the yield of both compounds **66** and **67** by comparison of the integration of the methoxy group of the internal standard (3.80 ppm, 9 integral units) to the  $CH_2$  of **66** and **67** [2.91 ppm (5.99 integral units) and 2.62 ppm (5.98 integral units) respectively]. From one experiment (3 equiv. of PhMgBr, 130 °C, 18 h), compounds **66** and **67** were purified by preparative HPLC to afford 2-phenyl-3-propyl-1H-indole **66** as a white solid (33 mg, 28%). **Mp** = 77-79 °C (lit. mp = 78-79 °C).<sup>11</sup> **<sup>1</sup>H NMR** (400 MHz,  $CDCl_3$ ) 1.01 (t,  $J$  = 7.4 Hz, 3 H,  $CH_3$ ), 1.78 (sxt,  $J$  = 7.8 Hz, 2 H,  $CH_2$ ), 2.82 - 2.94 (m, 2 H,  $CH_2$ ), 7.10 - 7.18 (m, 1 H, ArH), 7.22 (td,  $J$  = 7.5, 1.3 Hz, 1 H, ArH), 7.34 - 7.42 (m, 2 H, ArH), 7.45 - 7.52 (m, 2 H, 2 x ArH), 7.54 - 7.61 (m, 2 H, 2 x ArH), 7.66 (dd,  $J$  = 7.8, 0.8 Hz, 1 H, ArH), 7.99 (br s., 1 H, NH). **<sup>13</sup>C NMR** (101 MHz,  $CDCl_3$ ) 14.4, 24.2, 26.7, 110.7, 114.0, 119.4, 119.4, 122.2, 127.5, 127.9, 128.8, 129.4, 133.5, 134.1, 135.9. **ATR-IR**  $\nu_{max}$  (neat)/ $cm^{-1}$  3400, 3055, 2956, 2868, 1604, 1537, 1487, 1446, 1340, 1305, 1072, 906, 738, 696. **m/z (EI):** 235.1 ( $M^+$ , 28), 206.1 (100), 178.1 (15), 165.0 (3), 152.1 (3), 128.0 (4), 115.0 (3), 102.1 (7), 89.0 (3), 77.0 (8), 63.0 (3), 51.0 (4) and 2-(biphenyl)-3-propyl-1H-indole **67** as a white solid (41 mg, 26%). **Mp** = 90-92 °C. **<sup>1</sup>H NMR** (400 MHz,  $CDCl_3$ ) 0.90

(t,  $J = 7.3$  Hz, 3 H, CH<sub>3</sub>), 1.54 (sxt,  $J = 7.5$  Hz, 2 H, CH<sub>2</sub>), 2.56 - 2.65 (m, 2 H, CH<sub>2</sub>), 7.03 - 7.18 (m, 3 H, 3 x ArH), 7.19 - 7.25 (m, 5 H, 5 x ArH), 7.41 - 7.56 (m, 5 H, 4 x ArH + NH), 7.58 (d,  $J = 7.3$  Hz, 1 H, ArH). <sup>13</sup>C NMR (101 MHz, CDCl<sub>3</sub>) 14.5, 23.5, 26.8, 110.5, 114.5, 119.0, 119.3, 121.6, 127.0, 127.3, 128.3, 128.4, 128.5, 128.8, 130.6, 131.4, 131.6, 133.6, 135.7, 140.9, 141.3. ATR-IR  $\nu_{\max}$  (neat)/cm<sup>-1</sup> 3402, 2954, 2927, 1479, 1456, 1425, 1305, 1008, 738, 700.  $m/z$  (EI): 311.2 (M<sup>+</sup>, 42), 282.1 (100), 267.1 (19), 254.1 (5), 239.1 (3), 204.1 (7), 165.1 (7), 152.1 (3), 139.2 (3), 77.1 (4), 63.0 (1), 51.1 (1). HRMS (CI) calcd. for C<sub>23</sub>H<sub>21</sub>N<sup>+</sup> ([M+H]<sup>+</sup>): 312.1747, found: 312.1748.

#### Treatment of 3,3-dimethyl-2-phenyl-3*H*-indole (**72**) with Et<sub>3</sub>SiH/KO<sup>t</sup>Bu

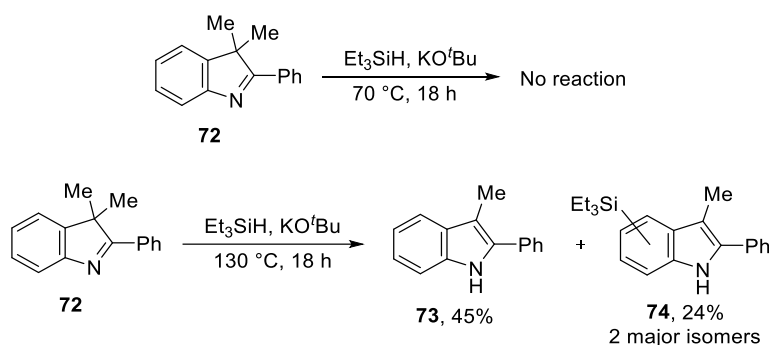

Carried out according to **General Procedure A** using 3,3-dimethyl-2-phenyl-3*H*-indole **72** (1.0 eq., 0.5 mmol, 110.65 mg), Et<sub>3</sub>SiH (3.0 eq., 1.5 mmol, 240 μL) and KO<sup>t</sup>Bu (3.0 eq., 1.5 mmol, 168.32 mg). Purification by column chromatography (petroleum ether → 1% EtOAc/99% petroleum ether) followed by another purification by column chromatography (petroleum ether → 2% Et<sub>2</sub>O/98% petroleum ether) afforded an isomeric mixture of silylated 3-methyl-2-phenyl-1*H*-indole **74** (2 major isomers) (38 mg, 24%) as a colourless oil and 3-methyl-2-phenyl-1*H*-indole **73** (47 mg, 45%) as a white solid.

Isomeric mixture of silylated 3-methyl-2-phenyl-1*H*-indole: <sup>1</sup>H NMR (400 MHz, CDCl<sub>3</sub>) δ 8.03 (br s, 1H, NH), 7.73 (s, 1H, ArH), 7.64 – 7.44 (m, 3H, 3 x ArH), 7.53 – 7.44 (m, 1H, ArH), 7.39 (t,  $J = 7.4$  Hz, 1H, ArH), 7.29 – 7.12 (m, 2H, 2 x ArH), 2.50 (2 x s, 3H, Me), 1.04 (t,  $J = 7.8$  Hz, 9H, 3 x RSiCH<sub>2</sub>CH<sub>3</sub>), 0.87 (2 x q,  $J = 7.6$ , 6H, 3 x RSiCH<sub>2</sub>CH<sub>3</sub>). <sup>13</sup>C NMR (101 MHz, CDCl<sub>3</sub>) δ 138.4, 136.8, 136.0, 136.0, 134.8, 134.2, 133.7, 133.7, 133.3, 132.7, 130.3, 130.2, 129.0, 128.2, 126.9, 122.5, 122.4, 119.7, 119.6, 119.1, 119.1, 110.8, 109.0, 108.7, 9.9, 9.8, 7.6, 3.5. ATR-IR  $\nu_{\max}$  (neat)/cm<sup>-1</sup> 3291, 3051, 2951, 2934, 2909, 2872, 1584, 1522, 1450, 1414, 1381, 1364, 1314, 1261, 1236, 1196, 1107, 1092, 1055, 1009, 943, 864, 833, 800, 729, 718, 698.  $m/z$  (EI) **isomer 1**: 321.1 (M<sup>+</sup>, 100%), 292.0 (2), 264.1 (48), 236.0 (52), 204.1 (36), 178.1 (6), 146.0 (4), 118.0 (44), 77.0 (9), 51.0 (1).  $m/z$  (EI) **isomer 2**: 321.1 (M<sup>+</sup>, 94%), 292.1 (12), 264.1 (29), 236.0 (100), 204.0 (17), 178.0 (6), 146.0 (2), 117.9 (47), 77.0 (8), 51.0 (1).

3-Methyl-2-phenyl-1*H*-indole: **Mp** = 111-114 °C (lit. mp 93-95 °C).<sup>23</sup> <sup>1</sup>H NMR (400 MHz, CDCl<sub>3</sub>) δ 8.01 (br s, 1H, NH), 7.70 – 7.57 (m,  $J = 13.6, 7.8$  Hz, 3H, 3 x ArH), 7.54 – 7.44 (m, 2H, 2 x ArH), 7.38 – 7.35 (m, 2H, 2 x ArH), 7.29 – 7.13 (m, 2H, 2 x ArH), 2.48 (s, 3H, Me). <sup>13</sup>C NMR (101 MHz, CDCl<sub>3</sub>)

$\delta$  136.0, 134.2, 133.5, 130.2, 129.0, 127.9, 127.5, 122.5, 119.7, 119.1, 110.8, 108.9, 9.8. **ATR-IR**  $\nu_{\text{max}}$  (neat)/ $\text{cm}^{-1}$  3311, 3055, 3030, 2976, 2924, 2860, 1533, 1489, 1445, 1368, 1335, 1314, 1304, 1263, 1246, 1234, 1196, 1094, 1003, 941, 862, 768, 741, 696, 623, 613. ***m/z* (EI):** 207.0 ( $\text{M}^+$ , 100%), 177.9 (7), 151.8 (2), 140.9 (2), 129.9 (33), 114.8 (2), 102.1 (17), 89.0 (8), 77.0 (80), 63.0 (27), 51.0 (43). The data are consistent with those previously reported in the literature<sup>24</sup>

#### Treatment of 3,3-dimethyl-2-phenyl-3*H*-indole (**72**) with KO<sup>t</sup>Bu

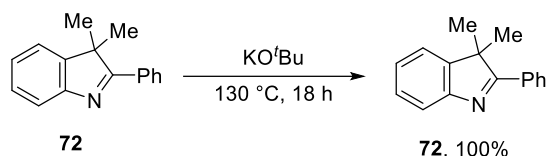

To a pressure tube in the glovebox under nitrogen was added 3,3-dimethyl-2-phenyl-3*H*-indole **72** (111 mg, 0.5 mmol, 1 equiv.) and potassium *tert*-butoxide (168 mg, 1.5 mmol, 3 equiv.). The tube was sealed and removed from the glovebox, and then heated at 130 °C for 18 h behind a shield. After cooling to room temperature, the mixture was diluted with water (50 mL) and extracted into diethyl ether (3 x 50 mL). The organic layers were dried over a hydrophobic frit and concentrated under reduced pressure. No reaction was found to occur, and starting material **72** was recovered, with data consistent with those reported above (111 mg, 100%).

#### Treatment of 3,3-dimethyl-2-phenyl-3*H*-indole (**72**) with PhMgBr

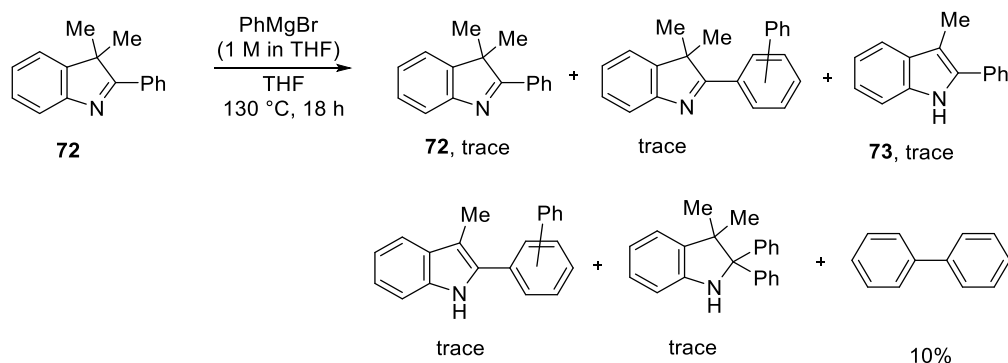

Carried out according to **General Procedure C** using 3,3-dimethyl-2-phenyl-3*H*-indole **72** (1.0 eq., 0.5 mmol, 110.65 mg) and PhMgBr (2.0 eq., 1 mmol, 1 mL) as a 1 M solution in THF and dry THF (500  $\mu\text{L}$ ). Purification by column chromatography (hexane  $\rightarrow$  5% EtOAc/95% hexane) afforded biphenyl (8 mg, 10%) as a white solid (8 mg, 10%). **Mp** = 65–67 °C (lit. mp = 65–67 °C).<sup>25</sup> **<sup>1</sup>H NMR** (400 MHz,  $\text{CDCl}_3$ )  $\delta$  7.65 – 7.57 (m, 2H, 2 x ArH), 7.53 – 7.41 (m, 2H, 2 x ArH), 7.42 – 7.32 (m, 1H, ArH). **<sup>13</sup>C NMR** (101 MHz,  $\text{CDCl}_3$ )  $\delta$  141.4, 128.9, 127.4, 127.3. **ATR-IR**  $\nu_{\text{max}}$  (neat)/ $\text{cm}^{-1}$  3061, 3032, 1597, 1570, 1479, 1429, 1344, 1265, 1182, 1169, 1074, 1007, 781, 727, 696, 610. ***m/z* (EI):** 154.0 ( $\text{M}^+$ , 100%), 139.0 (2), 128.0 (6), 115.0 (7), 102.0 (7), 87.0 (4), 76.0 (18), 63.0 (13), 51.0 (21). The data are consistent with those previously reported in the literature<sup>25</sup>



All other fractions contained mixtures of products that were tentatively identified by GC-MS. Trace amounts of the 3,3-dimethyl-2-phenyl-3*H*-indole starting material **72** (RT 13.91 min,  $m/z$  221.0), arylated 3,3-dimethyl-2-phenyl-3*H*-indole (RT 16.12 min,  $m/z$  297.1), 3-methyl-2-phenyl-1*H*-indole **73** (RT 14.93 min,  $m/z$  207.0), arylated 3-methyl-2-phenyl-1*H*-indole (RT 16.69 min,  $m/z$  283.0) and 3,3-dimethyl-2,2-diphenylindoline (RT 16.27,  $m/z$  299.1) were detected in the crude reaction mixture by GC-MS.

A small sample of PhMgBr (1 M in THF) was quenched with water at 0 °C and a sample of the organic layer was analysed by GC-MS. A small amount of biphenyl was present in the Grignard reagent by GC-MS.

#### Treatment of 3,3-dimethyl-2-phenyl-3*H*-indole (**72**) with $n$ BuMgBr

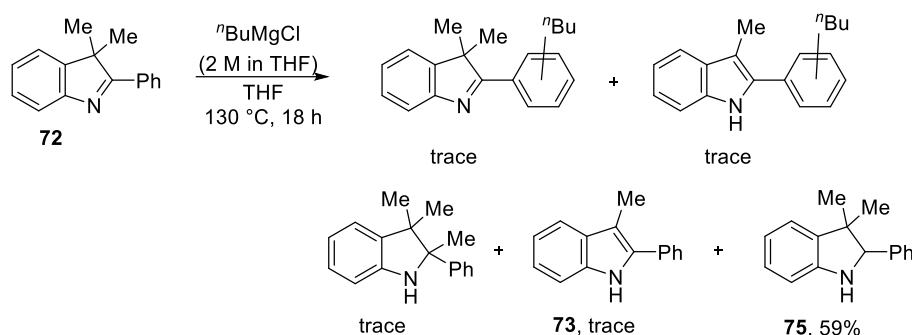

Carried out according to **General Procedure C** using 3,3-dimethyl-2-phenyl-3*H*-indole **72** (1.0 eq., 0.5 mmol, 110.65 mg) and  $n$ BuMgCl (2.0 eq., 1 mmol, 500  $\mu$ L) as a 2 M solution in THF and dry THF (1 mL). Purification by column chromatography (3% CH<sub>2</sub>Cl<sub>2</sub>/97% hexane  $\rightarrow$  CH<sub>2</sub>Cl<sub>2</sub>) afforded 3,3-dimethyl-2-phenylindoline **75** (65 mg, 59%) as a yellow oil. <sup>1</sup>H NMR (400 MHz, CDCl<sub>3</sub>)  $\delta$  7.49 – 7.42 (m, 2H, 2 x ArH), 7.41 – 7.27 (m, 3H, 3 x ArH), 7.13 – 7.03 (m, 2H, 2 x ArH), 6.79 (td,  $J$  = 7.4, 1.0 Hz, 1H, ArH), 6.72 (d,  $J$  = 7.7 Hz, 1H, ArH), 4.61 (s, 1H, CH), 4.09 (br s, 1H, NH), 1.44 (s, 3H, Me), 0.74 (s, 3H, Me). <sup>13</sup>C NMR (101 MHz, CDCl<sub>3</sub>)  $\delta$  149.4, 140.1, 138.2, 128.2, 127.6, 127.6, 127.5, 122.6, 119.1, 109.3, 74.7, 45.5, 26.7, 24.6. ATR-IR  $\nu_{\text{max}}$  (neat)/cm<sup>-1</sup> 3364, 3053, 3028, 2961, 2926, 2864, 1607, 1520, 1483, 1452, 1385, 1358, 1315, 1292, 1258, 1240, 1138, 1088, 1030, 1003, 812, 772, 741, 694.  $m/z$  (EI): 223.2 (M<sup>+</sup>, 53%), 208.2 (100), 193.1 (40), 180.1 (3), 165.1 (5), 146.1 (9), 130.1 (16), 115.1 (7), 103.1 (6), 91.1 (13), 77.1 (15), 65.1 (4), 51.1 (7). The data are consistent with those previously reported in the literature.<sup>1</sup>

Trace amounts of butylated 3,3-dimethyl-2-phenyl-3*H*-indole (RT 14.98 min,  $m/z$  277.1), butylated 3-methyl-2-phenyl-1*H*-indole (RT 15.46 min,  $m/z$  263.1), 2,3,3-trimethyl-2-phenylindoline (RT 14.22 min,  $m/z$  237.2) and 3-methyl-2-phenyl-1*H*-indole **73** (RT 15.02 min,  $m/z$  207.0) were detected by GC-MS.

### Treatment of 3,3-dimethyl-2-phenyl-3*H*-indole (**72**) with <sup>t</sup>BuMgBr

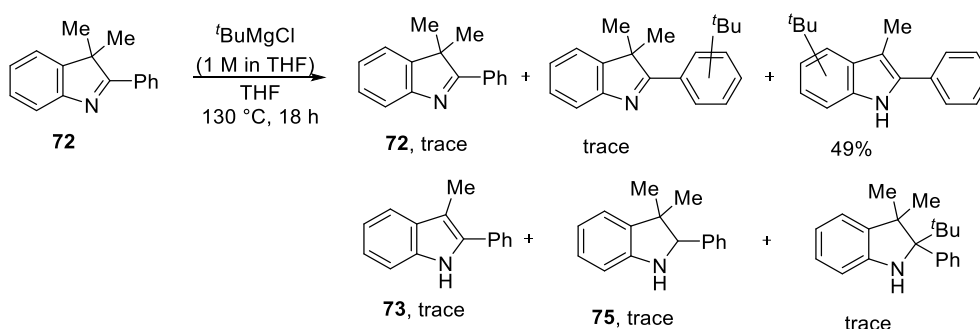

Carried out according to **General Procedure C** using 3,3-dimethyl-2-phenyl-3*H*-indole **72** (1.0 eq., 0.5 mmol, 110.65 mg) and <sup>t</sup>BuMgCl (2.0 eq., 1 mmol, 1 mL) as a 1 M solution in THF and dry THF (500  $\mu$ L). Purification by column chromatography afforded *t*-butylated 3-methyl-2-phenyl-1*H*-indole (65 mg, 49%) as a yellow oil. <sup>1</sup>H NMR (400 MHz, CDCl<sub>3</sub>)  $\delta$  7.99 (br s, 1H, NH), 7.65 (d,  $J$  = 7.7 Hz, 1H, ArH), 7.64 – 7.49 (m, 4H, 4 x ArH), 7.44 – 7.35 (m, 2H, 2 x ArH), 7.30 – 7.16 (m, 2H, 2 x ArH), 2.51 (s, 3H, Me), 1.43 (s, 9H, <sup>t</sup>Bu). <sup>13</sup>C NMR (101 MHz, CDCl<sub>3</sub>)  $\delta$  150.5, 135.9, 134.2, 130.6, 130.2, 127.5, 125.9, 122.2, 119.6, 119.0, 110.7, 108.5, 34.8, 31.5, 9.8. ATR-IR  $\nu_{\text{max}}$  (neat)/cm<sup>-1</sup> 3406, 3055, 3030, 2959, 2903, 2864, 1605, 1510, 1483, 1362, 1335, 1304, 1267, 1242, 1109, 1020, 908, 837, 739, 700. *m/z* (EI): 263.1 (M<sup>+</sup>, 98%), 248.1 (100), 233.1 (22), 217.1 (11), 204.1 (22), 191.1 (4), 178.1 (5), 152.1 (2), 130.1 (19), 109.8 (11), 90.0 (5), 77.0 (12), 57.0 (5).

Trace amounts of the 3,3-dimethyl-2-phenyl-3*H*-indole starting material (RT 13.91 min, *m/z* 221.1), *t*-butylated 3,3-dimethyl-2-phenyl-3*H*-indole starting material (RT 15.59 min, *m/z* 276.1), 3-methyl-2-phenyl-1*H*-indole **73** (RT 15.02 min, *m/z* 207.0), 3,3-dimethyl-2-phenylindoline **75** (RT 13.79 min, *m/z* 223.1) and 2-(*tert*-butyl)-3,3-dimethyl-2-phenylindoline (RT 16.71 min, *m/z* 279.1) were detected in the crude reaction mixture by GC-MS.

### Treatment of 3,3-dimethyl-2-phenyl-3*H*-indole (**72**) with BnMgCl

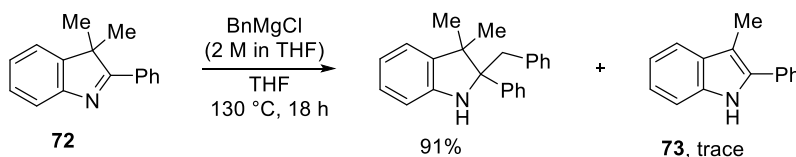

Carried out according to **General Procedure C** using 3,3-dimethyl-2-phenyl-3*H*-indole **72** (1.0 eq., 0.5 mmol, 110.65 mg) and BnMgCl (2.0 eq., 1 mmol, 500  $\mu$ L) as a 2 M solution in THF and dry THF (1 mL). Purification by column chromatography afforded 2-benzyl-3,3-dimethyl-2-phenylindoline (143 mg, 91%) as a yellow oil. <sup>1</sup>H NMR (400 MHz, CDCl<sub>3</sub>)  $\delta$  7.61 (d,  $J$  = 6.8 Hz, 2H, 2 x ArH), 7.45 – 7.30 (m, 3H, 3 x ArH), 7.21 – 7.10 (m, 5H, 5 x ArH), 6.88 (td,  $J$  = 7.4, 0.7 Hz, 1H, ArH), 6.77 (d,  $J$  = 7.6 Hz, 1H, ArH), 6.68 (dd,  $J$  = 7.7, 1.5 Hz, 2H, 2 x ArH), 4.03 (br s, 1H, NH), 3.37 (d,  $J$  = 12.9 Hz, 1H, CH<sub>2</sub>), 3.07 (d,  $J$  = 13.0 Hz, 1H, CH<sub>2</sub>), 1.68 (s, 3H, Me), 0.75 (s, 3H, Me). <sup>13</sup>C NMR (101 MHz, CDCl<sub>3</sub>)

$\delta$  147.7, 141.9, 138.2, 137.5, 130.3, 128.1, 128.0, 127.7, 127.1, 126.9, 126.5, 122.6, 118.9, 109.6, 75.7, 48.8, 40.9, 27.9, 20.1. **ATR-IR**  $\nu_{\text{max}}$  (neat)/ $\text{cm}^{-1}$  3362, 3082, 3055, 3026, 2961, 2924, 2905, 2860, 1607, 1493, 1483, 1458, 1445, 1387, 1362, 1333, 1319, 1260, 1242, 1209, 1180, 1153, 1111, 1092, 1076, 1053, 1032, 1018, 988, 922, 912, 887, 853, 810, 777, 741, 702, 685, 635, 610. ***m/z* (EI)**: 313.2 ( $\text{M}^+$ , 1%), 270.1 (1), 222.2 (100), 207.1 (100), 191.1 (3), 178.1 (130), 165.1 (5), 153.0 (5), 144.1 (6), 130.0 (18), 115.1 (8), 103.0 (5), 91.1 (55), 77.1 (10), 65.1 (18), 51.1 (4). **HRMS (ESI)** calcd. for  $\text{C}_{23}\text{H}_{24}\text{N}^+$  ( $[\text{M}+\text{H}]^+$ ): 314.1903, found 314.1906.

Trace amounts of 3-methyl-2-phenyl-1*H*-indole **73** (RT 15.02 min,  $m/z$  207.0) were also detected in the crude reaction mixture by GC-MS.

#### Treatment of 2-(4-methoxyphenyl)-3,3-dimethyl-3*H*-indole with $\text{Et}_3\text{SiH}/\text{KO}^t\text{Bu}$

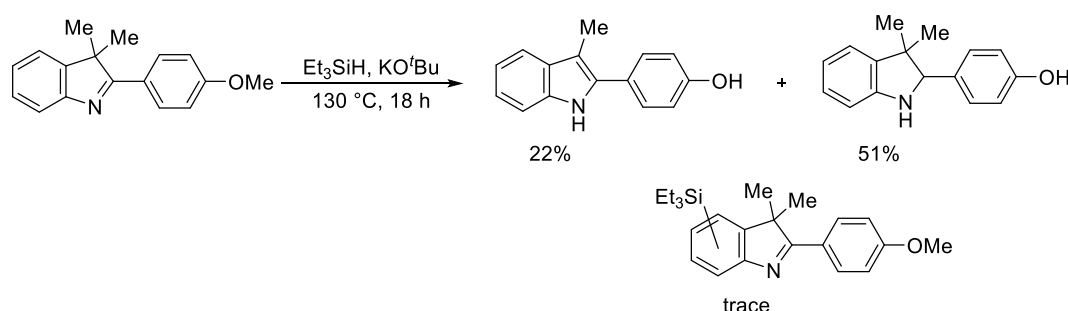

Carried out according to **General Procedure A** using 2-(4-methoxyphenyl)-3,3-dimethyl-3*H*-indole (1.0 eq., 0.5 mmol, 125.67 mg),  $\text{Et}_3\text{SiH}$  (3.0 eq., 1.5 mmol, 240  $\mu\text{L}$ ) and  $\text{KO}^t\text{Bu}$  (3.0 eq., 1.5 mmol, 168.32 mg). The aqueous layer after the  $\text{Et}_2\text{O}$  (3 x 50 mL) washes was further acidified with 2 M HCl and was further extracted with  $\text{Et}_2\text{O}$  (3 x 50 mL). Purification by column chromatography (100% hexane  $\rightarrow$  8%  $\text{EtOAc}$ /92% hexane) afforded 4-(3,3-dimethylindolin-2-yl)phenol (61 mg, 51%) as a yellow oil and a compound that was tentatively identified as 4-(3-methyl-1*H*-indol-2-yl)phenol (25 mg, 22%) as a very unstable fluorescent yellow oil.

4-(3,3-dimethylindolin-2-yl)phenol:  **$^1\text{H}$  NMR** (400 MHz,  $\text{CDCl}_3$ )  $\delta$  7.31 (d,  $J$  = 8.5 Hz, 2H, 2 x ArH), 7.13 – 7.01 (m, 2H, 2 x ArH), 6.86 – 6.75 (m, 2H, 2 x ArH), 6.71 (d,  $J$  = 7.7 Hz, 1H, ArH), 4.68 (br s, 1H, NH), 4.53 (s, 1H, CH), 1.40 (s, 3H, Me), 0.74 (s, 3H, Me).  **$^{13}\text{C}$  NMR** (101 MHz,  $\text{CDCl}_3$ )  $\delta$  155.2, 149.5, 138.3, 132.2, 128.8, 127.5, 122.7, 119.1, 115.1, 109.3, 74.2, 45.4, 26.6, 24.5. **ATR-IR**  $\nu_{\text{max}}$  (neat)/ $\text{cm}^{-1}$  3370, 3049, 3028, 2957, 2922, 2864, 1609, 1512, 1483, 1458, 1387, 1360, 1317, 1237, 1167, 1138, 1111, 1086, 1045, 1016, 908, 841, 820 789, 746, 733, 689, 638, 613. ***m/z* (EI)**: 237.1 ( $[\text{M}-2]^+$ , 100%), 221.8 (52), 191.0 (6), 180.9 (9), 167.0 (4), 144.1 (35), 129.8 (9), 118.9 (93), 103.0 (35), 91.0 (84), 77.0 (53), 64.1 (43), 50.9 (62). ***m/z* (EI)**: 239.1 ( $\text{M}^+$ , 16%), 223.8 (100), 175.7 (3), 158.3 (4), 129.7 (19), 117.0 (40), 106.8 (26), 90.9 (40), 76.8 (48), 65.0 (15), 50.9 (14). **HRMS (ESI)** calcd. for  $\text{C}_{16}\text{H}_{16}\text{NO}^-$  ( $[\text{M}-\text{H}]^-$ ): 238.1237, found 238.1230.

4-(3-methyl-1*H*-indol-2-yl)phenol: **<sup>1</sup>H NMR** (400 MHz, CDCl<sub>3</sub>) δ 8.03 (br s, 1H, NH), 7.63 – 7.56 (m, 2H, 2 x ArH), 7.54 – 7.42 (m, 2H, 2 x ArH), 7.41 – 7.31 (m, 2H, 2 x ArH), 7.24 – 7.09 (m, 2H, 2 x ArH), 2.47 (s, 3H, Me). ***m/z* (EI)**: 223 (M<sup>+</sup>, 33%), 207.8 (3), 194.0 (100), 180.1 (7), 165.0 (3), 151.9 (19), 127.1 (4), 117.0 (22), 104.0 (47), 92.0 (36), 77.0 (100), 65.0 (32), 51.0 (86). No further data was obtained due to the quick decomposition of the compound.

Trace amounts of the silylated 2-(4-methoxyphenyl)-3,3-dimethyl-3*H*-indole (RT 17.29 min, *m/z* 365.3) were detected in the crude reaction mixture by GC-MS.

#### Treatment of 2-(4-fluorophenyl)-3,3-dimethyl-3*H*-indole with Et<sub>3</sub>SiH/KO<sup>t</sup>Bu

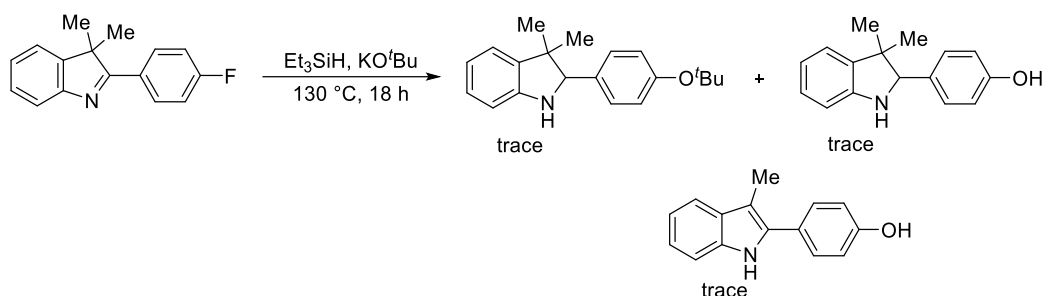

Carried out according to **General Procedure A** using 2-(4-fluorophenyl)-3,3-dimethyl-3*H*-indole (1.0 eq., 0.5 mmol, 119.65 mg), Et<sub>3</sub>SiH (3.0 eq., 1.5 mmol, 240 μL) and KO<sup>t</sup>Bu (3.0 eq., 1.5 mmol, 168.32 mg). The crude mixture was purified by column chromatography (100% hexane → 8% EtOAc/92% hexane) but no clean products were isolated. Trace amounts of 2-(4-(*tert*-butoxy)phenyl)-3,3-dimethylindoline (RT 16.26 min, *m/z* 295.2), 4-(3,3-dimethylindolin-2-yl)phenol (RT 15.93 min, *m/z* 239.1), 4-(3-methyl-1*H*-indol-2-yl)phenol (RT 16.99 min, *m/z* 223.0) were detected in the crude reaction mixture by GC-MS.

#### Treatment of 3,3-dimethyl-2-(4-(trifluoromethyl)phenyl)-3*H*-indole with Et<sub>3</sub>SiH/KO<sup>t</sup>Bu

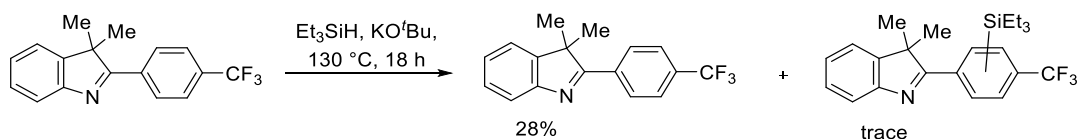

Carried out according to **General Procedure A** using 3,3-dimethyl-2-(4-(trifluoromethyl)phenyl)-3*H*-indole (1.0 eq., 0.5 mmol, 144.65 mg), Et<sub>3</sub>SiH (3.0 eq., 1.5 mmol, 240 μL) and KO<sup>t</sup>Bu (3.0 eq., 1.5 mmol, 168.32 mg). Purification by column chromatography (100% hexane → 1% EtOAc/99% hexane) afforded the 3,3-dimethyl-2-(4-(trifluoromethyl)phenyl)-3*H*-indole starting material (40 mg, 28%) as a yellow solid. **Mp** = 97–100 °C (no mp reported in the lit.). **<sup>1</sup>H NMR** (400 MHz, CDCl<sub>3</sub>) δ 8.26 (d, *J* = 8.2 Hz, 2H, 2 x ArH), 7.74 (t, *J* = 7.9 Hz, 3H, 3 x ArH), 7.44 – 7.28 (m, 3H, 3 x ArH), 1.60 (s, 6H, 2 x Me). **<sup>13</sup>C NMR** (101 MHz, CDCl<sub>3</sub>) δ 181.9, 152.9, 147.7, 136.7, 132.1 (q, *J* = 32.8 Hz), 128.7, 128.1, 126.7, 125.7 (q, *J* = 3.3 Hz), 124.1 (q, *J* = 271.9 Hz), 121.5, 121.2, 53.8, 24.6. **ATR-IR** *v*<sub>max</sub> (neat)/cm<sup>-1</sup> 3073, 2969, 2930, 2870, 1618, 1518, 1472, 1454, 1408, 1321, 1308, 1165, 1125, 1111, 1090, 1067,

1013, 993, 934, 845, 826, 789, 772, 746, 698, 683. ***m/z* (EI):** 289.1 ( $M^+$ , 100%), 274.1 (56), 254.1 (1), 233.1 (5), 218.1 (2), 204.1 (10), 179.1 (8), 144.1 (19), 130.6 (13), 117.1 (37), 103.1 (29), 91.0 (18), 77.1 (31), 63.1 (6). 51.1 (11). The data are consistent with those previously reported in the literature.<sup>1</sup>

Trace amounts of silylated 3,3-dimethyl-2-(4-(trifluoromethyl)phenyl)-3*H*-indole starting material (RT 16.11 min, *m/z* 403.1) were detected by GC-MS.

#### Treatment of 3,3-dimethyl-2-(*p*-tolyl)-3*H*-indole with Et<sub>3</sub>SiH/KO<sup>t</sup>Bu

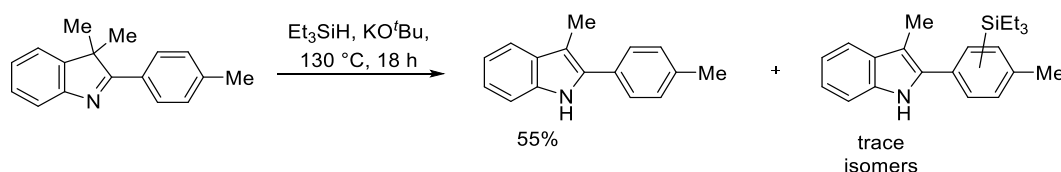

Carried out according to **General Procedure A** using 3,3-dimethyl-2-(*p*-tolyl)-3*H*-indole (1.0 eq., 0.5 mmol, 110.65 mg), Et<sub>3</sub>SiH (3.0 eq., 1.5 mmol, 240  $\mu$ L) and KO<sup>t</sup>Bu (3.0 eq., 1.5 mmol, 168.32 mg). Purification by column chromatography (hexane  $\rightarrow$  0.5% EtOAc/99.5% hexane) followed by another purification by column chromatography (hexane  $\rightarrow$  1% Et<sub>2</sub>O/99% hexane) afforded 3-methyl-2-(*p*-tolyl)-1*H*-indole (61 mg, 55%) as a white solid. **mp** = 108-111 °C (lit. mp. 110-111 °C).<sup>26</sup> **<sup>1</sup>H NMR** (400 MHz, CDCl<sub>3</sub>)  $\delta$  7.97 (br s, 1H, NH), 7.61 (d, *J* = 7.8 Hz, 1H, ArH), 7.49 (d, *J* = 8.1 Hz, 2H, 2 x ArH), 7.37 (d, *J* = 7.9 Hz, 1H, ArH), 7.30 (d, *J* = 7.9 Hz, 2H, 2 x ArH), 7.25 – 7.11 (m, 2H, 2 x ArH), 2.47 (s, 3H, Me), 2.43 (s, 3H, Me). **<sup>13</sup>C NMR** (101 MHz, CDCl<sub>3</sub>)  $\delta$  137.3, 135.9, 134.3, 130.6, 130.2, 129.7, 127.8, 122.3, 119.6, 119.0, 110.7, 108.4, 21.4, 9.8. **ATR-IR**  $\nu_{\text{max}}$  (neat)/cm<sup>-1</sup> 3377, 3053, 3024, 2913, 2859, 1508, 1485, 1458, 1437, 1369, 1331, 1314, 1302, 1244, 1237, 1186, 1157, 1113, 1032, 1018, 997, 845, 824, 812, 756, 741, 727, 681, 627. ***m/z* (EI):** 221.1 ( $M^+$ , 100%), 204.1 (27), 191.1 (2), 178.1 (4), 167.1 (1), 152.1 (2), 139.0 (1), 130.1 (19), 117.1 (2), 109.6 (6), 102.1 (9), 89.1 (3), 77.1 (6), 63.0 (2), 51.1 (2). The data are consistent with those previously reported in the literature.<sup>26</sup>

Trace amounts of isomers of silylated 3-methyl-2-(*p*-tolyl)-1*H*-indole (RT 18.53 min, 18.65 min, 18.87 min (major isomer), *m/z* 335.2) were present in the crude reaction mixture by GC-MS.

#### Treatment of 2,3,3-triphenyl-3*H*-indole (**81**) with Et<sub>3</sub>SiH/KO<sup>t</sup>Bu

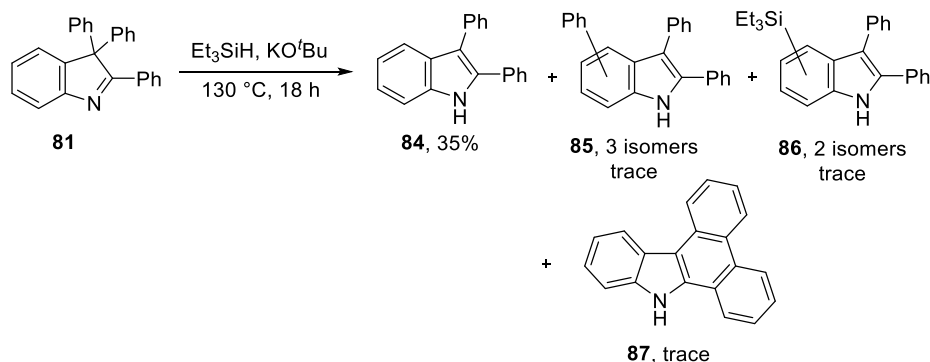

Carried out according to **General Procedure A** using 2,3,3-triphenyl-3*H*-indole **81** (1.0 eq., 0.5 mmol, 172.73 mg), Et<sub>3</sub>SiH (3.0 eq., 1.5 mmol, 240  $\mu$ L) and KO<sup>t</sup>Bu (3.0 eq., 1.5 mmol, 168.32 mg). Two purifications by column chromatography (hexane  $\rightarrow$  10% Et<sub>2</sub>O/90% hexane, hexane  $\rightarrow$  1.5% EtOAc/98.5% hexane) afforded 2,3-diphenyl-1*H*-indole **84** (47 mg, 35%) as a yellow oil. <sup>1</sup>H NMR (400 MHz, CDCl<sub>3</sub>)  $\delta$  8.13 (br s, 1H, NH), 7.69 (d, *J* = 7.8 Hz, 1H, ArH), 7.45 – 7.44 (m, 2H, 2 x ArH), 7.42 – 7.34 (m, 5H, 5 x ArH), 7.32 – 7.20 (m, 5H, 5 x ArH), 7.19 – 7.11 (m, 1H, ArH). <sup>13</sup>C NMR (101 MHz, CDCl<sub>3</sub>)  $\delta$  136.0, 135.2, 134.2, 132.8, 130.3, 128.9, 128.8, 128.7, 128.3, 127.8, 126.4, 122.8, 120.6, 119.8, 115.2, 111.0. ATR-IR  $\nu_{\text{max}}$  (neat)/cm<sup>-1</sup> 3406, 3055, 3026, 2951, 2924, 2855, 1601, 1553, 1504, 1481, 1454, 1439, 1423, 1329, 1304, 1250, 1152, 1115, 1070, 1028, 1011, 984, 964, 908, 764, 743, 696, 608. *m/z* (EI): 269.1 (M<sup>+</sup>, 100%), 254.0 (7), 239.0 (8), 213.0 (3), 190.0 (5), 165.0 (26), 133.5 (17), 120.5 (7), 113.0 (5), 103.0 (3), 89.0 (4), 77.0 (10), 63.0 (9), 51.0 (14). The data for this compound are consistent with those previously reported in the literature.<sup>27</sup>

Trace amounts of three isomers of arylated 2,3-diphenyl-1*H*-indole **85** (RT 18.81, 19.721, 21.16 min, *m/z* 345.3) and two isomers of silylated 2,3-diphenyl-1*H*-indole **86** (RT 19.08 and 20.04 min, *m/z* 383.3 and 383.4) were detected by GC-MS. Trace amounts of 9*H*-dibenzo[*a,c*]carbazole **87** (RT 20.12 min, *m/z* 267.2) was detected by GC-MS and <sup>1</sup>H NMR with <sup>1</sup>H NMR data consistent with those previously reported in the literature.<sup>28</sup>

Treatment of 3,3-diallyl-2-phenyl-3*H*-indole (**82**) with Et<sub>3</sub>SiH/KO<sup>t</sup>Bu

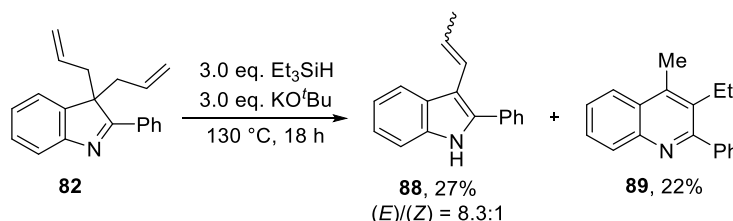

Carried out according to **General Procedure A** using 3,3-diallyl-2-phenyl-3*H*-indole (1.0 eq., 0.5 mmol, 137 mg), Et<sub>3</sub>SiH (3.0 eq., 1.5 mmol, 240  $\mu$ L) and KO<sup>t</sup>Bu (3.0 eq., 1.5 mmol, 168 mg). Purification by column chromatography (hexane  $\rightarrow$  3% EtOAc/97% hexane) afforded 2-phenyl-3-(prop-1-en-1-yl)-1*H*-indole (*E*)/(*Z*)=8.3:1 (31 mg, 27%) as a yellow oil and 3-ethyl-4-methyl-2-phenylquinoline (27 mg, 22%) as a yellow oil.

(*E*)/(*Z*)-Phenyl-3-(prop-1-en-1-yl)-1*H*-indole: <sup>1</sup>H NMR (400 MHz, CDCl<sub>3</sub>)  $\delta$  8.23 (br s, 1H, (*Z*)-NH), 8.07 (br s, 1H, (*E*)-NH), 7.93 (d, *J* = 7.8 Hz, 1H, (*E*)-ArH), 7.68 (dd, *J* = 8.3, 1.1 Hz, 2H, 2 x (*Z*)-ArH), 7.60 (dd, *J* = 8.2, 1.1 Hz, 2H, 2 x (*E*)-ArH), 7.53 – 7.46 (m, 3H, (*Z*)-ArH, 2 x (*E*)-ArH), 7.45 – 7.42 (m, 2H, 2 x (*Z*)-ArH), 7.42 – 7.35 (m, 2H, 2 x (*E*)-ArH), 7.36 – 7.30 (m, 2H, 2 x (*Z*)-ArH), 7.21 (tdd, *J* = 14.8, 7.3, 1.2 Hz, 4H, 2 x (*Z*)-ArH, 2 x (*E*)-ArH), 6.65 (dq, *J* = 15.9, 1.6 Hz, 1H, (*E*)-alkene CHAr), 6.60 – 6.52 (m, 1H, (*Z*)-alkene CHAr), 6.35 (dq, *J* = 16.0, 6.5 Hz, 1H, (*E*)-alkene CHCH<sub>3</sub>), 5.90 (dq, *J* = 11.1, 6.9 Hz, 1H, (*Z*)-alkene CHCH<sub>3</sub>), 1.95 (dd, *J* = 6.5, 1.6 Hz, 3H, (*E*)-CH<sub>3</sub>), 1.62 (dd, *J* = 6.9, 1.7

Hz, 3H, (Z)-CH<sub>3</sub>). Due to the instability of the compounds in this mixture (their tendency to polymerise), it was not possible to obtain further characterisation data.

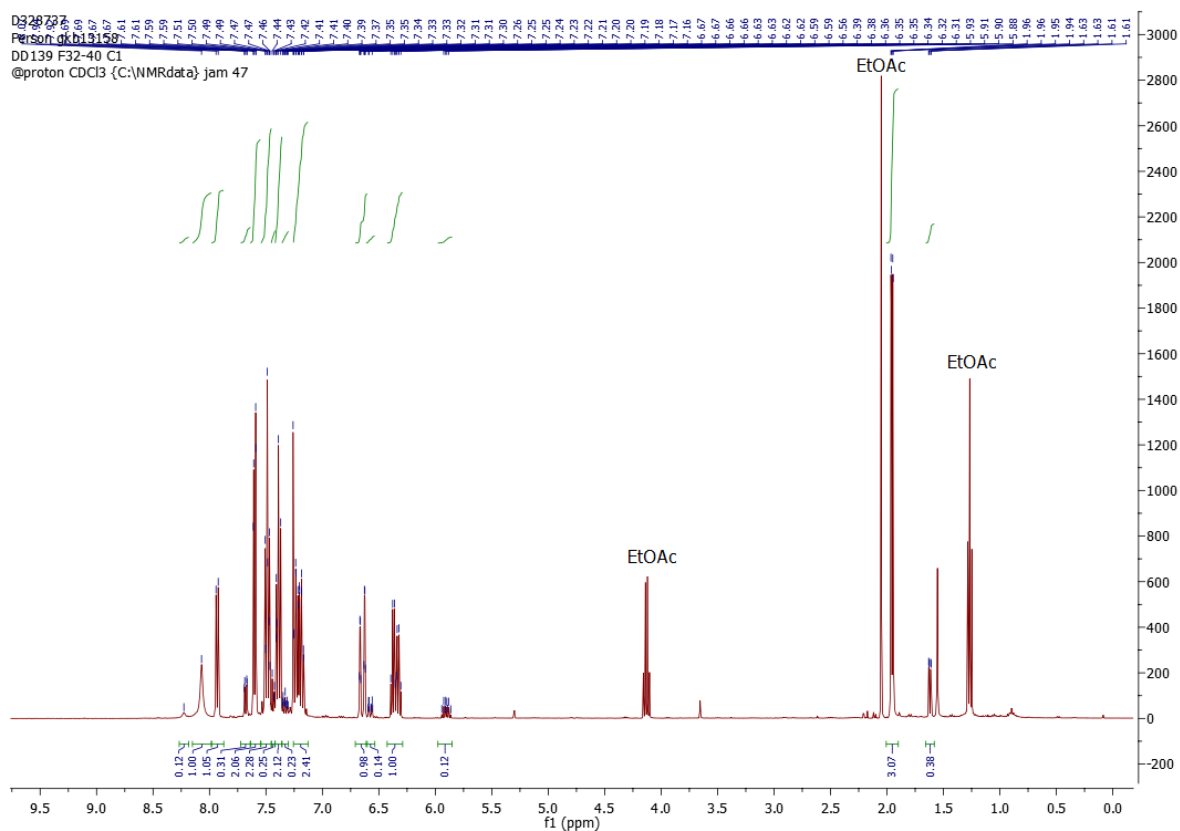

Figure S1. <sup>1</sup>H NMR data evidence for the formation of **88**

3-Ethyl-4-methyl-2-phenylquinoline: <sup>1</sup>H NMR (400 MHz, CDCl<sub>3</sub>) δ 8.12 (dd, *J* = 8.3, 0.5 Hz, 1H, ArH), 8.04 (dd, *J* = 8.4, 0.7 Hz, 1H, ArH), 7.66 (td, *J* = 8.3, 1.3 Hz, 1H, ArH), 7.55 (td, *J* = 8.2, 1.2 Hz, 1H, ArH), 7.53 – 7.38 (m, 5H, 5 x ArH), 2.81 (q, *J* = 7.5 Hz, 2H, CH<sub>2</sub>), 2.74 (s, 3H, ArCH<sub>3</sub>), 1.08 (t, *J* = 7.5 Hz, 3H, CH<sub>2</sub>CH<sub>3</sub>). <sup>13</sup>C NMR (101 MHz, CDCl<sub>3</sub>) δ 161.0, 145.9, 142.2, 141.7, 133.5, 130.2, 128.6, 128.5, 128.3, 127.9, 127.8, 126.3, 123.6, 23.3, 14.9, 14.4. ATR-IR ν<sub>max</sub> (neat)/cm<sup>-1</sup> 3057, 3026, 2967, 2928, 2870, 1574, 1558, 1493, 1452, 1441, 1400, 1373, 1354, 1346, 1321, 1271, 1258, 1233, 1184, 1146, 1136, 1098, 1072, 1057, 1043, 1024, 1001, 964, 908, 862, 799, 754, 727, 700, 677, 665. *m/z* (EI): 247.2 (M<sup>+</sup>, 39%), 246.2 (100), 231.1 (24), 217.1 (10), 204.1 (3), 189.1 (1), 167.1 (2), 140.1 (1), 128.1 (5), 115.2 (8), 108.6 (4), 103.1 (4), 89.0 (3), 77.1 (7), 63.1 (3), 51.1 (5). HRMS (ESI) calcd. for C<sub>18</sub>H<sub>18</sub>N<sup>+</sup> ([M+H]<sup>+</sup>): 248.1434, found 248.1434.



Treatment of 3,3-dibenzyl-2-phenyl-3*H*-indole (**83**) with Et<sub>3</sub>SiH/KO<sup>t</sup>Bu

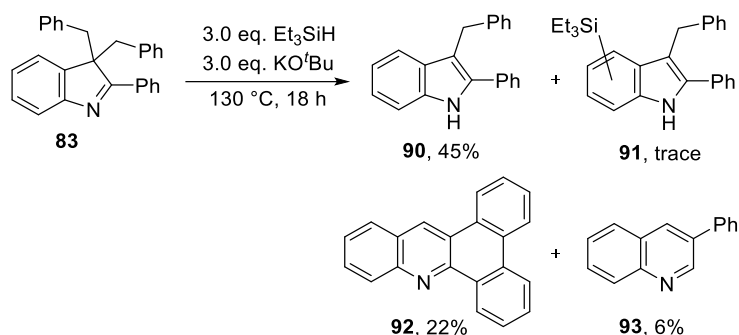

Carried out according to **General Procedure A** using 3,3-dibenzyl-2-phenyl-3*H*-indole **83** (1.0 eq., 0.5 mmol, 186.75 mg), Et<sub>3</sub>SiH (3.0 eq., 1.5 mmol, 240  $\mu$ L) and KO<sup>t</sup>Bu (3.0 eq., 1.5 mmol, 168.32 mg). Purifications by column chromatography (hexane  $\rightarrow$  5% EtOAc/95% hexane) afforded 3-benzyl-2-phenyl-1*H*-indole **90** (64 mg, 45%) as a bright yellow oil. The fractions containing the slightly impure dibenzo[*a,c*]acridine **92** were purified by recrystallisation from hexane/EtOAc affording pure dibenzo[*a,c*]acridine **92** as a bright yellow solid (31 mg, 22%). The fractions containing the impure 3-phenylquinoline **93** were purified by preparative TLC (35% EtOAc/65% hexane) affording pure 3-phenylquinoline **93** as a pale brown oil (6 mg, 6%).

3-Benzyl-2-phenyl-1*H*-indole: <sup>1</sup>H NMR (400 MHz, CDCl<sub>3</sub>)  $\delta$  8.13 (br s, 1H, NH), 7.57 – 7.50 (m, 2H, 2 x ArH), 7.48 – 7.39 (m, 4H, 4 x ArH), 7.39 – 7.32 (m, 1H, ArH), 7.30 – 7.17 (m, 6H, 6 x ArH), 7.08 (t,  $J$  = 8.0 Hz, 1H, ArH), 4.29 (s, 2H, CH<sub>2</sub>). <sup>13</sup>C NMR (101 MHz, CDCl<sub>3</sub>)  $\delta$  141.6, 136.2, 135.6, 133.1, 129.7, 129.0, 128.5, 128.4, 128.0, 127.9, 125.9, 122.5, 119.9, 119.8, 111.3, 110.9, 30.6. ATR-IR  $\nu_{\text{max}}$  (neat)/cm<sup>-1</sup> 3410, 3057, 3024, 2955, 2928, 2870, 1601, 1518, 1491, 1452, 1425, 1341, 1304, 1244, 1177, 1153, 1144, 1113, 1096, 1074, 1043, 1007, 991, 955, 914, 847, 808, 764, 741, 725, 696, 669, 627, 608.  $m/z$  (EI): 283.3 (M<sup>+</sup>, 83%), 206.2 (100), 191.1 (3), 178.2 (20), 165.2 (4), 152.1 (4), 141.7 (4), 128.1 (8), 102.4 (5), 91.2 (3), 77.2 (23), 65.1 (3), 51.0 (10). The data for this compound are consistent with those previously reported in the literature.<sup>29</sup>

Dibenzo[*a,c*]acridine: **Mp** = 203–205 °C (decomp.) (lit. mp = 204–205 °C).<sup>30</sup> <sup>1</sup>H NMR (400 MHz, CDCl<sub>3</sub>)  $\delta$  9.57 – 9.45 (m, 1H, ArH), 9.20 (s, 1H, ArH), 8.58 – 8.56 (m, 1H, ArH), 8.54 – 8.44 (m, 2H, 2 x ArH), 8.34 (d,  $J$  = 8.6 Hz, 1H, ArH), 8.00 (d,  $J$  = 8.1 Hz, 1H, ArH), 7.80 (ddd,  $J$  = 8.4, 6.8, 1.3 Hz, 1H, ArH), 7.75 – 7.70 (m, 2H, 2 x ArH), 7.66 – 7.54 (m, 3H, 3 x ArH). <sup>13</sup>C NMR (101 MHz, CDCl<sub>3</sub>)  $\delta$  147.0, 146.7, 132.2, 130.9, 130.3, 130.0, 129.7, 128.7, 128.3, 128.1, 127.9, 127.7, 127.0, 126.4, 126.4, 123.6, 123.5, 123.4, 122.8 (two overlapping signals). ATR-IR  $\nu_{\text{max}}$  (neat)/cm<sup>-1</sup> 3067, 3049, 1597, 1543, 1504, 1491, 1472, 1458, 1445, 1410, 1381, 1342, 1323, 1306, 1261, 1236, 1229, 1202, 1171, 1146, 1129, 1051, 1036, 1007, 995, 949, 905, 876, 854, 800, 758, 718, 700, 683, 668, 654, 633, 608.  $m/z$  (EI): 279.3 (M<sup>+</sup>, 100%), 251.3 (3), 224.2 (2), 139.3 (15), 125.2 (3), 112.2 (2), 74.2 (1), 63.1 (2), 51.2 (2). The data for this compound are consistent with those previously reported in the literature.<sup>30</sup>



3-Phenylquinoline:  $^1\text{H}$  NMR (400 MHz,  $\text{CDCl}_3$ )  $\delta$  9.19 (d,  $J = 2.2$  Hz, 1H, ArH), 8.31 (d,  $J = 2.0$  Hz, 1H, ArH), 8.15 (d,  $J = 8.4$  Hz, 1H, ArH), 7.89 (dd,  $J = 8.2, 1.2$  Hz, 1H, ArH), 7.76 – 7.70 (m, 3H, 3 x ArH), 7.62 – 7.51 (m, 3H, 3 x ArH), 7.45 (ddd,  $J = 7.4, 3.9, 1.2$  Hz, 1H, ArH).  $^{13}\text{C}$  NMR (101 MHz,  $\text{CDCl}_3$ )  $\delta$  150.1, 147.5, 138.1, 134.0, 133.4, 129.5, 129.4, 129.3, 128.3, 128.2, 128.2, 127.6, 127.2. ATR-IR  $\nu_{\text{max}}$  (neat)/ $\text{cm}^{-1}$  3057, 3030, 2922, 2853, 1597, 1491, 1449, 1412, 1364, 1341, 1290, 1261, 1227, 1182, 1159, 1142, 1125, 1076, 1043, 1026, 953, 920, 903, 862, 787, 762, 750, 696, 669, 610.  $m/z$  (EI): 205.3 ( $\text{M}^+$ , 100%), 176.2 (20), 151.2 (9), 139.2 (3), 126.3 (3), 113.2 (1), 102.3 (10), 88.2 (6), 76.2 (14), 63.1 (7), 51.1 (9). The data for this compound are consistent with those previously reported in the literature.<sup>30</sup>

Trace amounts of silylated 3-benzyl-2-phenyl-1H-indole **91** were detected by GC-MS (RT 19.83 min,  $m/z$  397.5).

## Mechanistic studies

### Preparation of potassium 4,4'-di-*tert*-butyl-1,1'-biphenyl

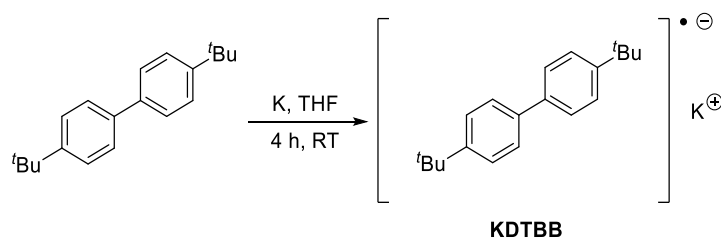

This reaction was carried out according to a literature procedure.<sup>31</sup> Potassium metal was washed with hexane under argon atmosphere to remove mineral oil. The hexane was removed by needle and syringe and quenched with isopropanol, and the potassium metal was then transferred to the glovebox where the residual hexane was removed under vacuum. The oxide layer was removed from potassium in the glovebox by scraping with a knife, exposing a fresh metallic surface. Potassium metal (177 mg, 4.5 mmol, 1 equiv.) was then added to a solution of 4,4'-di-*tert*-butylbiphenyl (1.2 g, 4.5 mmol, 1 equiv.) in THF (180 mL). The resulting solution was stirred under nitrogen until an intense green colour formed (~4 h). THF was then evaporated under vacuum in the glovebox, affording a green/white solid (KDTBB) which was used immediately without further purification.

### Treatment of 2-(2-methoxyphenyl)-2-propylpentanenitrile (**23**) with potassium 4,4'-di-*tert*-butyl-1,1'-biphenyl (KDTBB), $\text{Me}_3\text{SiSiMe}_3$ and $\text{KO}^t\text{Bu}$

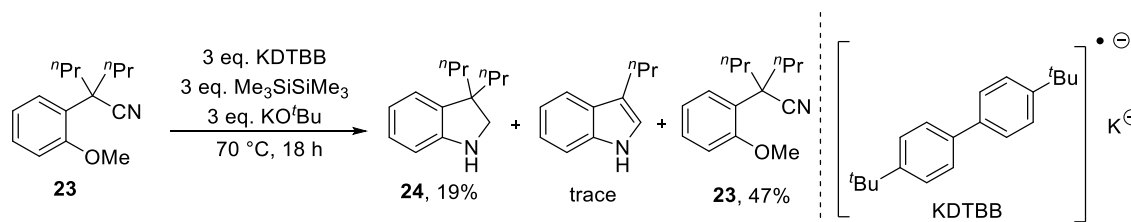

KDTBB was prepared as described above. To a pressure tube in the glovebox under nitrogen was added 2-(2-methoxyphenyl)-2-propylpentanenitrile **23** (116 mg, 0.5 mmol, 1 equiv.), potassium di-*tert*-butylbiphenylide (KDTBB) (458 mg, 1.5 mmol, 3 equiv.), hexamethyldisilane (0.31 mL, 1.5 mmol, 3 equiv.) and potassium *tert*-butoxide (168 mg, 1.5 mmol, 3 equiv.). The tube was sealed, removed from the glovebox and heated at 70 °C for 18 h behind a shield. After cooling to room temperature, the mixture was diluted with water (50 mL) and extracted into diethyl ether (3 x 50 mL). The combined organic layers were dried over Na<sub>2</sub>SO<sub>4</sub>, filtered and concentrated under reduced pressure. The crude mixture was purified by column chromatography eluting with hexane:ethyl acetate (100:0 → 9:1) to afford starting material **23** as a colourless oil (55 mg, 47%), with data consistent with those reported above, 3,3-dipropylindoline **24** as a colourless oil (19 mg, 19%), with data consistent with those reported above, and 3-propyl-1*H*-indole (<1 mg), with data consistent with those reported above.

Treatment of 2-(2-methoxyphenyl)-2-propylpentanenitrile (**23**) with potassium 4,4'-di-*tert*-butyl-1,1'-biphenyl (KDTBB) and KO<sup>t</sup>Bu

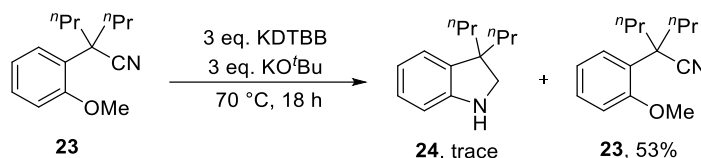

To a pressure tube in the glovebox under nitrogen was added 2-(2-methoxyphenyl)-2-propylpentanenitrile **23** (116 mg, 0.5 mmol, 1 equiv.), KDTBB (458 mg, 1.5 mmol, 3 equiv.), and potassium *tert*-butoxide (168 mg, 1.5 mmol, 3 equiv.). The tube was sealed, removed from the glovebox and heated at 70 °C for 18 h behind a shield. After cooling to room temperature, the mixture was diluted with water (50 mL) and extracted into diethyl ether (3 x 50 mL). The combined organic layers were dried over Na<sub>2</sub>SO<sub>4</sub>, filtered and concentrated under reduced pressure. The crude mixture was purified by column chromatography eluting with hexane:ethyl acetate (100:0 → 9:1) to afford starting material **23** as a colourless oil (61 mg, 53%), with data consistent with those reported above, and 3,3-dipropylindoline **24** as a colourless oil (<1 mg), with data consistent with those reported above.

Treatment of 2-(2-methoxyphenyl)-2-propylpentanenitrile (**23**) with Me<sub>3</sub>SiSiMe<sub>3</sub> and KO<sup>t</sup>Bu

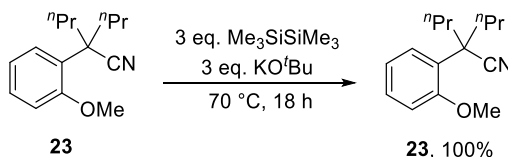

To a pressure tube in the glovebox under nitrogen was added 2-(2-methoxyphenyl)-2-propylpentanenitrile **23** (116 mg, 0.5 mmol, 1 equiv.), hexamethyldisilane (0.31 mL, 1.5 mmol, 3 equiv.), and potassium *tert*-butoxide (168 mg, 1.5 mmol, 3 equiv.). The tube was sealed, removed from the glovebox and heated at 70 °C for 18 h behind a shield. After cooling to room temperature, the mixture was diluted with water (50 mL) and extracted into diethyl ether (3 x 50 mL). The combined

organic layers were dried over Na<sub>2</sub>SO<sub>4</sub>, filtered and concentrated under reduced pressure. No reaction was found to have taken place, and 2-(2-methoxyphenyl)-2-propylpentanenitrile **23** was recovered with data consistent with those reported above (116 mg, 100%).

#### Treatment of 2-(2-methoxyphenyl)-2-propylpentanenitrile (**23**) with KO<sup>t</sup>Bu

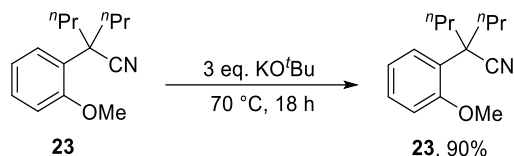

To a pressure tube in the glovebox under nitrogen was added 2-(2-methoxyphenyl)-2-propylpentanenitrile **23** (116 mg, 0.5 mmol, 1 equiv.), and potassium *tert*-butoxide (168 mg, 1.5 mmol, 3 equiv.). The tube was sealed, removed from the glovebox and heated at 70 °C for 18 h behind a shield. After cooling to room temperature, the mixture was diluted with water (50 mL) and extracted into diethyl ether (3 x 50 mL). The combined organic layers were dried over Na<sub>2</sub>SO<sub>4</sub>, filtered and concentrated under reduced pressure. No reaction was found to have taken place, and 2-(2-methoxyphenyl)-2-propylpentanenitrile **23** was recovered with data consistent with those reported above (104 mg, 90%).

#### Treatment of 2-(2-methoxyphenyl)-2-propylpentanenitrile (**23**) with LiAlH<sub>4</sub> at 70 °C

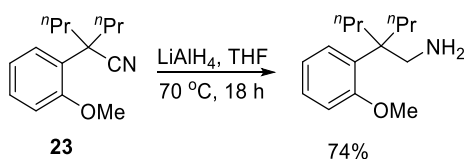

To a pressure tube in the glovebox, under nitrogen, was added 2-(2-methoxyphenyl)-2-propylpentanenitrile **23** (116 mg, 0.50 mmol, 1.0 equiv.) and lithium aluminium hydride (2 M in THF, 0.75 mL, 1.50 mmol, 3.0 equiv.) and THF (0.25 mL). The tube was sealed, removed from the glovebox and stirred at 70 °C for 18 h. After cooling to room temperature, the reaction mixture was quenched by addition of water:THF (1:4, 50 mL) then 2 M NaOH (50 mL). The products were extracted into diethyl ether (3 x 50 mL) and the combined organic layers were dried over a hydrophobic frit and concentrated under reduced pressure. Purification by column chromatography (cyclohexane:ethyl acetate, 100:0 → 9:1) afforded 2-(2-methoxyphenyl)-2-propylpentan-1-amine as a colourless oil (87 mg, 74%). <sup>1</sup>H NMR (400 MHz, CDCl<sub>3</sub>) 0.88 (t, *J* = 6.9 Hz, 6 H, 2 x CH<sub>3</sub>), 1.01 - 1.20 (br m, 6 H, 2 x CH<sub>2</sub> + NH<sub>2</sub>), 1.69 (ddd, *J* = 13.8, 11.8, 5.4 Hz, 2 H, CH<sub>2</sub>), 1.82 (ddd, *J* = 13.8, 11.8, 4.9 Hz, 2 H, CH<sub>2</sub>), 3.05 (s, 2 H, CH<sub>2</sub>N), 3.82 (s, 3 H, OCH<sub>3</sub>), 6.88 (dd, *J* = 8.0, 1.0 Hz, 1 H, ArH), 6.92 (app. td, *J* = 7.4, 1.0 Hz, 1 H, ArH), 7.15 - 7.24 (m, 2 H, 2 x ArH). <sup>13</sup>C NMR (101 MHz, CDCl<sub>3</sub>) 15.0, 17.3, 36.1, 46.5, 46.6, 55.1, 111.6, 120.3, 127.2, 129.4, 133.0, 158.5. ATR-IR ν<sub>max</sub> (neat)/cm<sup>-1</sup> 2954, 2869, 1578, 1488, 1455, 1289, 1236, 1180, 1095, 1027, 746, 470. HRMS (CI) calcd. for C<sub>15</sub>H<sub>26</sub>NO<sup>+</sup> ([M+H]<sup>+</sup>): 236.2014, found: 236.2016.

Treatment of 2-(2-methoxyphenyl)-2-propylpentanenitrile (**23**) with LiAlH<sub>4</sub> at 130 °C

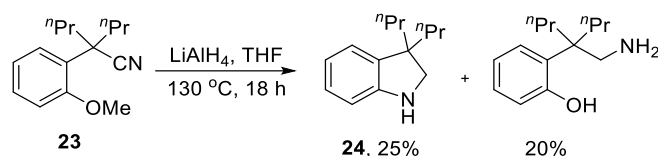

To a pressure tube in the glovebox, under nitrogen, was added 2-(2-methoxyphenyl)-2-propylpentanenitrile **23** (116 mg, 0.50 mmol, 1.0 equiv.) and lithium aluminium hydride (28.0 mg, 1.50 mmol, 3.0 equiv.) and THF (1 mL). The tube was sealed, removed from the glovebox and stirred at 130 °C for 18 h. After cooling to room temperature, the reaction mixture was quenched by addition of water (50 mL) then 2 M NaOH (50 mL). The products were extracted into diethyl ether (3 x 50 mL) and the combined organic layers were dried over a hydrophobic frit and concentrated under reduced pressure. Purification by column chromatography (hexane:ethyl acetate, 100:0 → 1:9) afforded 3,3-dipropylindoline **23** as a yellow oil (25 mg, 25%), with data consistent with those reported above, and 2-(4-(aminomethyl)heptan-4-yl)phenol as a white solid (22 mg, 20%). **Mp** = 90-91 °C. **<sup>1</sup>H NMR** (400 MHz, CDCl<sub>3</sub>) 0.92 (t, *J* = 7.4 Hz, 6 H, 2 x CH<sub>3</sub>), 1.06 - 1.21 (m, 2 H, 2 x CH), 1.24 - 1.38 (m, 2 H, 2 x CH), 1.62 - 1.73 (m, 2 H, 2 x CH), 1.81 (ddd, *J* = 13.6, 12.4, 4.8 Hz, 2 H, 2 x CH), 3.05 (s, 2 H, NCH<sub>2</sub>), 6.72 - 6.80 (m, 1 H, ArH), 6.87 (dd, *J* = 7.9, 1.3 Hz, 1 H, ArH), 7.04 - 7.13 (m, 2 H, 2 x ArH). **<sup>13</sup>C NMR** (101 MHz, CDCl<sub>3</sub>) 14.8, 17.1, 38.5, 45.3, 49.1, 118.2, 119.1, 127.6, 128.5, 130.6, 157.5. **ATR-IR**  $\nu_{\text{max}}$  (neat)/cm<sup>-1</sup> 3371, 2954, 2868, 1620, 1581, 1463, 1440, 1425, 1280, 1224, 904, 839, 748. **HRMS (CI)** calcd. for C<sub>14</sub>H<sub>24</sub>NO<sup>+</sup> ([M+H]<sup>+</sup>): 222.1852, found: 222.1853.

Treatment of 2'-phenylspiro[cyclohexane-1,3'-indole] (**76**) with Et<sub>3</sub>SiH/KO<sup>t</sup>Bu

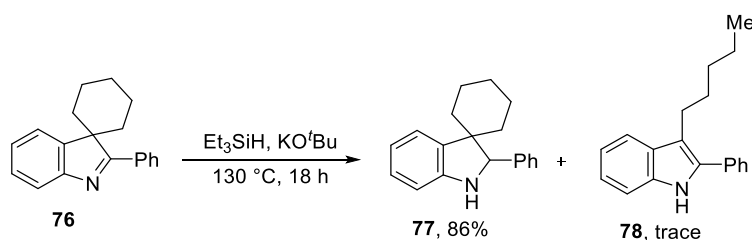

Carried out according to **General Procedure A** using 2'-phenylspiro[cyclohexane-1,3'-indole] **76** (1.0 eq., 0.5 mmol, 130.685 mg), Et<sub>3</sub>SiH (3.0 eq., 1.5 mmol, 240 μL) and KO<sup>t</sup>Bu (3.0 eq., 1.5 mmol, 168.32 mg). Purification by column chromatography (100% hexane → 2% Et<sub>2</sub>O/98% hexane) afforded 2'-phenylspiro[cyclohexane-1,3'-indoline] **77** (113 mg, 86%) as a viscous yellow oil. **<sup>1</sup>H NMR** (400 MHz, CDCl<sub>3</sub>) δ 7.42 – 7.19 (m, 6H, 6 x ArH), 7.10 (t, *J* = 7.6 Hz, 1H, ArH), 6.79 (t, *J* = 7.4 Hz, 1H, ArH), 6.70 (d, *J* = 7.7 Hz, 1H, ArH), 4.59 (s, 1H, CH), 4.13 (br s, 1H, NH), 1.91 – 1.81 (m, 2H, Cy), 1.77 – 1.67 (m, 2H, Cy), 1.65 – 1.54 (m, 1H, Cy), 1.53 – 1.36 (m, 3H, Cy), 1.29 – 1.08 (m, 2H, Cy). **<sup>13</sup>C NMR** (101 MHz, CDCl<sub>3</sub>) δ 150.2, 141.4, 137.2, 128.2, 128.0, 127.7, 127.6, 124.4, 118.6, 108.8, 73.1, 49.3, 37.4, 31.9, 25.9, 23.1, 22.3. **ATR-IR**  $\nu_{\text{max}}$  3368, 3053, 3026, 2926, 2849, 1605, 1481, 1462, 1452, 1395, 1364, 1350, 1317, 1300, 1252, 1240, 1169, 1028, 957, 914, 881, 847, 802, 768, 739, 700, 685, 660,

625, 615.  $m/z$  (EI): 261.1 ( $[M-2]^+$ , 100%), 246.1 (2), 232.1 (50), 218.1 (21), 204.1 (49), 184.1 (26), 170.1 (9), 156.1 (16), 131.0 (33), 115.0 (43), 91.0 (21), 77.0 (34), 56.0 (19), 51.0 (16).  $m/z$  (ESI+APCI) 264 ( $[M+H]^+$ ). The data are consistent with those previously reported in the literature<sup>1</sup>

At RT 15.69 min,  $m/z$  (EI): 263.0 was detected in the GC-MS of the crude reaction mixture, which can be equally attributed to the presence of any of the two products as they have the same  $m/z$  of 263.2. Trace amounts of 3-pentyl-2-phenyl-1*H*-indole **78** were detected in some column fractions by  $^1H$  NMR (Broad NH peak at  $\sim 7.99$  ppm integrating to 1H unit and deshielded  $CH_2$  triplet at  $\sim 2.88$  ppm integrating to 2H units).

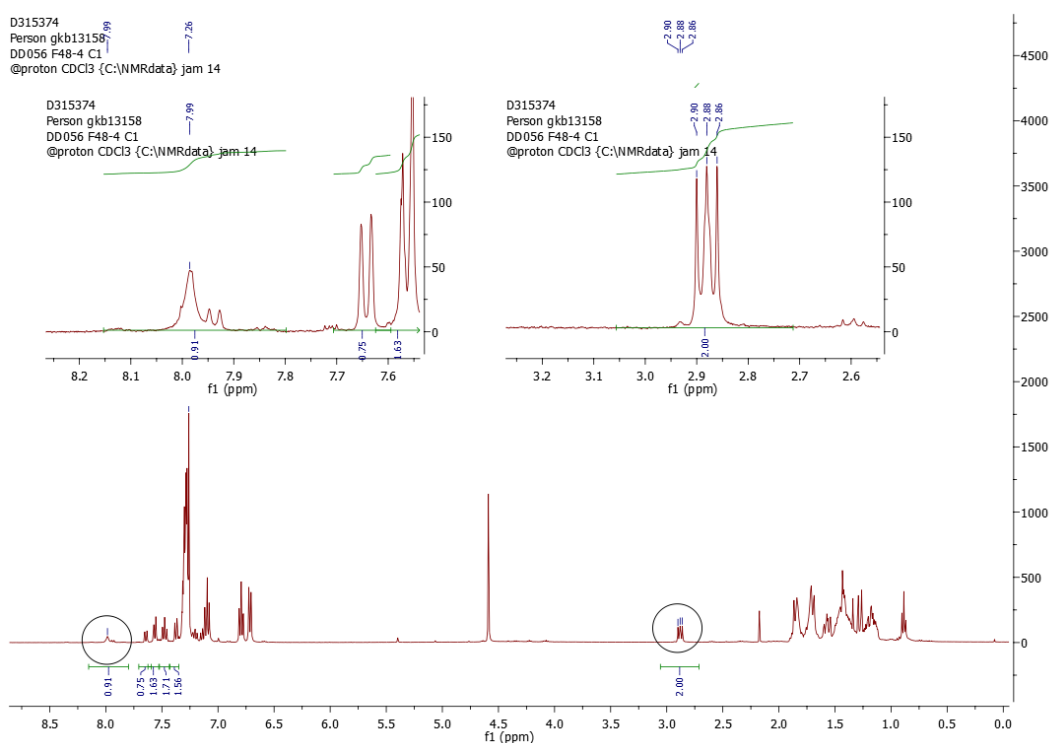

Figure S2.  $^1H$  NMR data evidence for the formation of **78**

Treatment of 3,3-dimethyl-2-phenyl-3*H*-indole (**72**) with K/KO<sup>t</sup>Bu

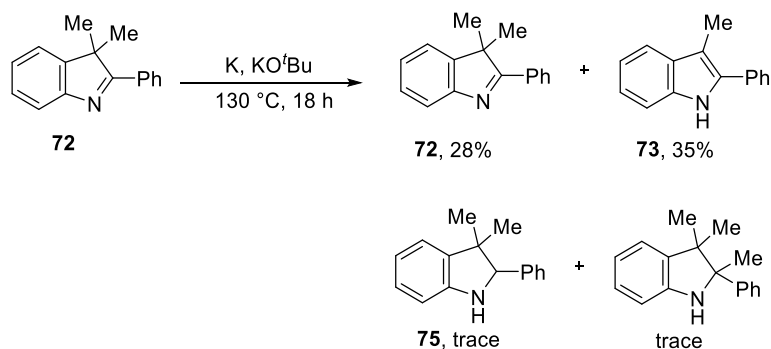

3,3-Dimethyl-2-phenyl-3*H*-indole **72** (1.0 eq., 0.5 mmol, 110.65 mg), potassium metal (1.3 eq., 0.66 mmol, 26 mg) and KO<sup>t</sup>Bu (1.0 eq., 0.5 mmol, 56.11 mg) were sealed in a pressure tube in a nitrogen-

filled glovebox. The contents of the pressure tube were stirred at 130 °C for 18 h before the pressure tube was cooled to room temperature, opened to air, quenched with *i*PrOH at 0 °C and diluted with water (50 mL). The organic products were extracted into Et<sub>2</sub>O (3 x 50 mL). The combined organic phases were dried over Na<sub>2</sub>SO<sub>4</sub>, filtered and concentrated. Purification by column chromatography (petroleum ether → 2% EtOAc/98% petroleum ether) afforded the 3,3-dimethyl-2-phenyl-3*H*-indole starting material **72** (31 mg, 28%) as a yellow oil and 3-methyl-2-phenyl-1*H*-indole **73** (36 mg, 35%) as a white solid.

3-methyl-2-phenyl-1*H*-indole: **<sup>1</sup>H NMR** (400 MHz, CDCl<sub>3</sub>) δ 8.01 (br s, 1H, NH), 7.70 – 7.55 (m, 3H, 3 x ArH), 7.52 – 7.48 (m, 2H, 2 x Ar), 7.40 – 7.37 (m, 2H, 2 x ArH), 7.26 – 7.16 (m, 2H, 2 x ArH), 2.49 (s, 3H, Me). ***m/z* (EI)**: 207.1 (M<sup>+</sup>, 100), 190.9 (2), 178.1 (14), 152.1 (4), 139.1 (2), 130.0 (39), 115.0 (3), 102.1 (21), 89.0 (7), 77.0 (45), 63.0 (12), 51.0 (24). The data are consistent with the data reported earlier in this report.

3,3-dimethyl-2-phenyl-3*H*-indole: **<sup>1</sup>H NMR** (400 MHz, CDCl<sub>3</sub>) δ 8.19 – 8.14 (m, 2H, 2 x ArH), 7.72 (d, *J* = 7.6 Hz, 1H, ArH), 7.58 – 7.45 (m, 3H, 3 x ArH), 7.42 – 7.32 (m, 2H, 2 x ArH), 7.33 – 7.23 (m, 1H, ArH), 1.61 (s, 6H, 2 x Me). **<sup>13</sup>C NMR** (101 MHz, CDCl<sub>3</sub>) δ 183.4, 153.0, 147.7, 133.3, 130.8, 128.8, 128.5, 127.9, 126.1, 121.1, 121.0, 53.7, 24.9. **ATR-IR** *v*<sub>max</sub> 3057, 2965, 2926, 2864, 1520, 1491, 1470, 1454, 1441, 1385, 1364, 1337, 1315, 1265, 1209, 1169, 1156, 1109, 1088, 1074, 1032, 1003, 988, 935, 862, 824, 772, 750, 731. ***m/z* (EI)**: 221.1 (M<sup>+</sup>, 100%), 206.1 (54), 178.0 (5), 144.0 (15), 128.1 (9), 115.0 (33), 103.0 (56), 91.0 (24), 77.0 (62), 63.0 (12), 51.0 (27). The data are consistent with those previously reported in the literature<sup>1</sup>

Trace amounts of 3,3-dimethyl-2-phenylindoline **75** (RT 13.75 min, *m/z* 223.1) and 2,3,3-trimethyl-2-phenylindoline (RT 13.97 min, *m/z* 237.1) were detected in the crude reaction mixture by GC-MS and <sup>1</sup>H NMR.

#### Treatment of 3,3-dimethyl-2-phenyl-3*H*-indole (**72**) with Et<sub>3</sub>SiH/KO<sup>t</sup>Bu/TEMPO

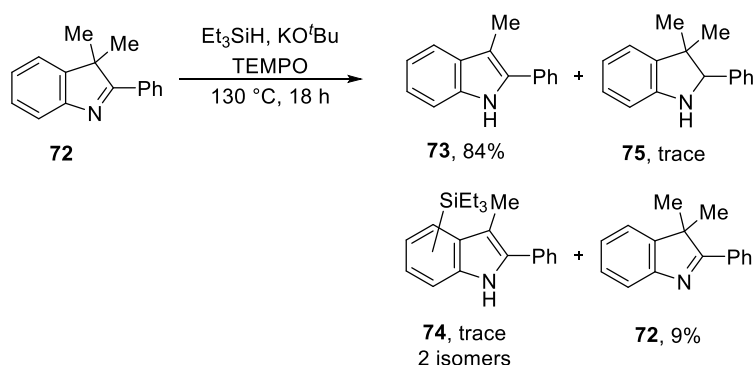

3,3-Dimethyl-2-phenyl-3*H*-indole **72** (1.0 eq., 0.5 mmol, 110.65 mg), Et<sub>3</sub>SiH (3.0 eq., 1.5 mmol, 240 μL), KO<sup>t</sup>Bu (3.0 eq., 1.5 mmol, 168.32 mg) and TEMPO (1.0 eq., 0.5 mmol, 78.125 mg) were sealed in a pressure tube in a nitrogen-filled glovebox. The contents of the pressure tube were stirred at 130

°C for 18 h before the pressure tube was cooled to room temperature, opened to air and diluted with water (50 mL). The organic products were extracted into Et<sub>2</sub>O (3 x 50 mL). The combined organic phases were dried over Na<sub>2</sub>SO<sub>4</sub>, filtered and concentrated. Purification by column chromatography afforded 3-methyl-2-phenyl-1*H*-indole **73** (87 mg, 84%) as a white solid and the 3,3-dimethyl-2-phenyl-3*H*-indole starting material **72** (10 mg, 9%) as a brown oil.

3-methyl-2-phenyl-1*H*-indole: <sup>1</sup>H NMR (400 MHz, CDCl<sub>3</sub>) δ 8.05 (br s, 1H, NH), 7.72 – 7.56 (m, 2H, 2 x ArH), 7.54 – 7.46 (m, 2H, 2 x ArH), 7.46 – 7.29 (m, 2H, 2 x ArH), 7.30 – 7.16 (m, 2H, 2 x ArH), 2.50 (s, 3H, Me). *m/z* (EI): 207.1 (M<sup>+</sup>, 100%), 190.9 (2), 178.0 (15), 167.0 (2), 151.9 (4), 139.1 (2), 130.0 (40), 115.0 (3), 102.1 (22), 89.0 (8), 77.0 (48), 63.0 (14), 51.0 (26). The data are consistent with the data reported for this compound earlier in this report.

3,3-dimethyl-2-phenyl-3*H*-indole: <sup>1</sup>H NMR (400 MHz, CDCl<sub>3</sub>) δ 8.19 – 8.16 (m, 2H, 2 x ArH), 7.73 (d, *J* = 7.5 Hz, 1H, ArH), 7.60 – 7.45 (m, 3H, 3 x ArH), 7.42 – 7.32 (m, 2H, 2 x ArH), 7.32 – 7.26 (m, 1H, ArH), 1.61 (s, 6H, 2 x Me). <sup>13</sup>C NMR (101 MHz, CDCl<sub>3</sub>) δ 183.5, 155.1, 147.5, 133.0, 131.0, 128.9, 128.7, 128.0, 126.2, 121.1, 120.9, 53.7, 25.0. ATR-IR *v*<sub>max</sub> 3059, 2963, 2926, 2857, 1520, 1491, 1468, 1454, 1443, 1387, 1364, 1337, 1315, 1263, 1248, 1221, 1209, 1169, 1155, 1132, 1109, 1003, 935, 862, 773, 752, 696. *m/z* (EI): 220.9 (M<sup>+</sup>, 48%), 205.9 (32), 180.0 (2), 164.8 (8), 144.0 (13), 127.9 (5), 115.0 (31), 103.0 (82), 90.9 (29), 77.0 (100), 63.0 (18), 51.0 (51). The data are consistent with those previously reported in the literature<sup>1</sup>

Trace amounts of 3,3-dimethyl-2-phenylindoline **75** (RT 13.72 min, *m/z* 223.1) and 2 major isomers of silylated 3-methyl-2-phenyl-1*H*-indole **74** (RT 17.41 and 17.81 min, *m/z* 321.1 and *m/z* 320.9) were detected in the crude reaction mixture by GC-MS and <sup>1</sup>H NMR.

Et<sub>3</sub>Si-TEMPO adduct (predicted *m/z* 271.2) was detected by GC-MS when the reaction mixture was quenched carefully with chloroform at 0 °C and no aqueous work-up was performed prior to analysis. This was consistent with the detection of the Et<sub>3</sub>Si-TEMPO adduct that was previously reported in the literature.<sup>32,33</sup> It is important to note that diminished amounts of 3-methyl-2-phenyl-1*H*-indole were observed by crude GC-MS, possibly due to 3-methyl-2-phenyl-1*H*-indole reacting with dichlorocarbene, resulting from the reaction between chloroform and KO<sup>t</sup>Bu. The reaction between indoles and dichlorocarbenes is known in the literature as the Ciamician-Dennstedt rearrangement.

File :D:\Data\July20\DD178\_Crude.D  
 Operator :  
 Acquired : 21 Aug 2020 12:02 using AcqMethod EI320.M  
 Instrument : GCMS\_AG  
 Sample Name: DD178\_Crude  
 Misc Info :  
 Vial Number: 3

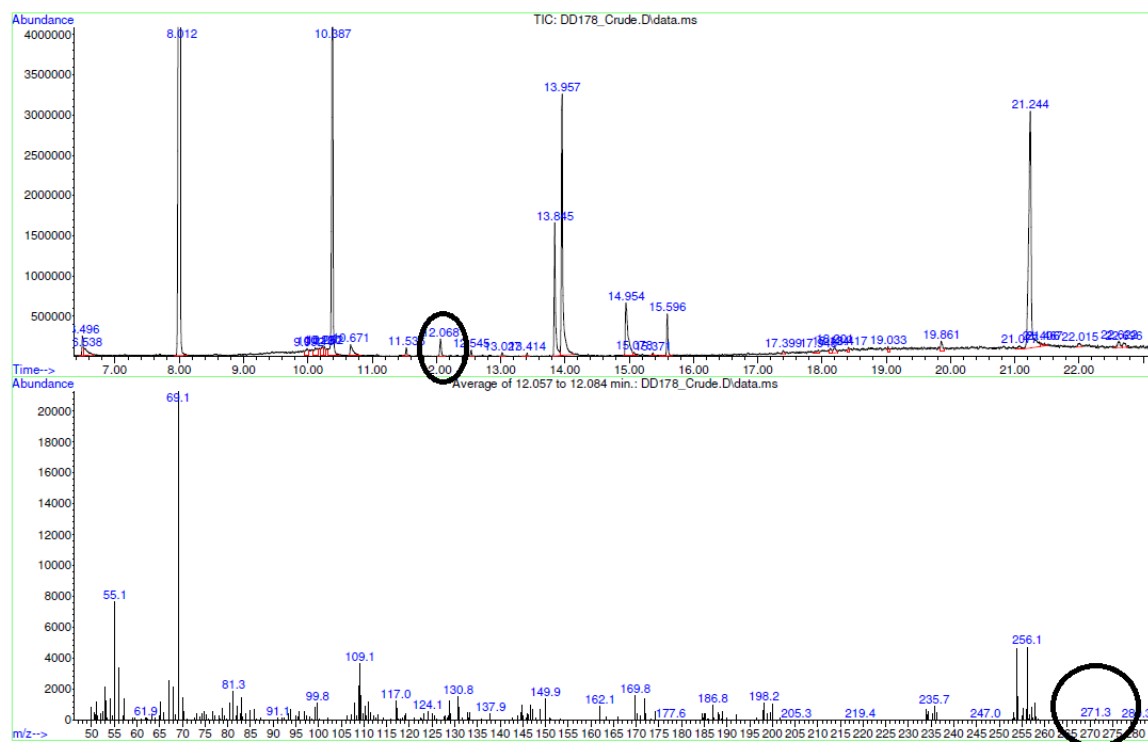

Figure S3. GC-MS evidence for the formation of Et<sub>3</sub>Si-TEMPO



# NMR Spectra

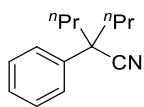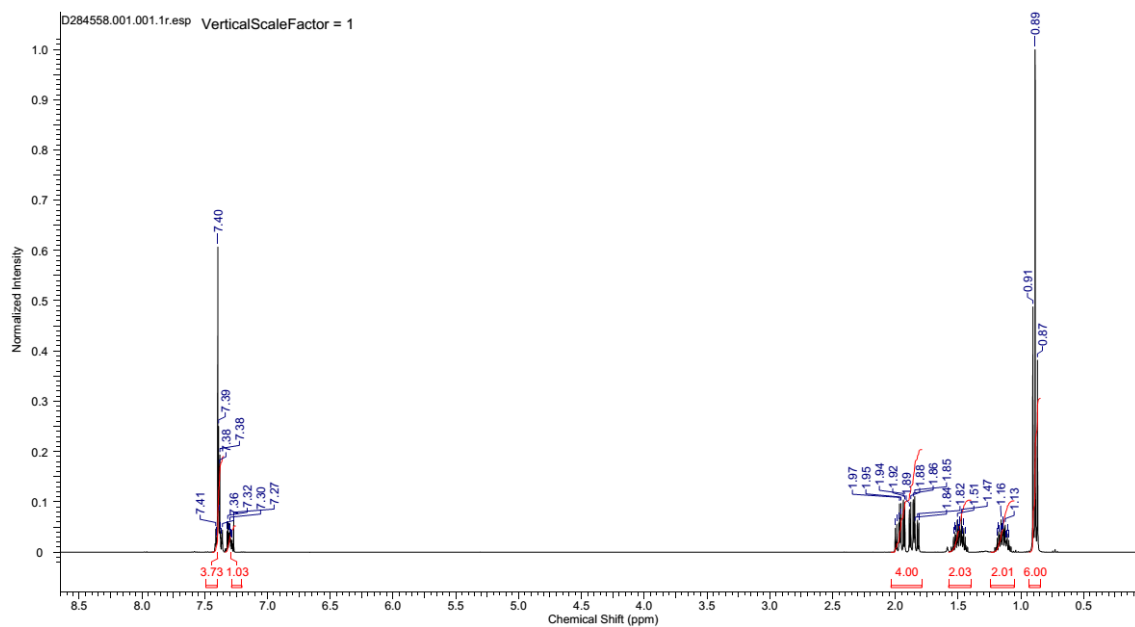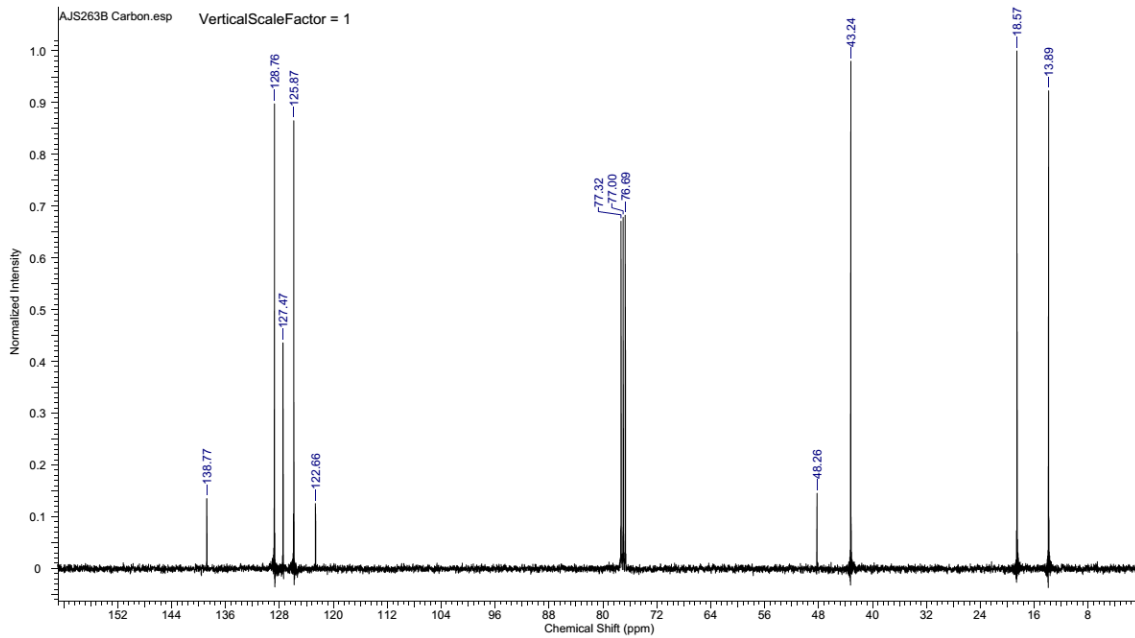

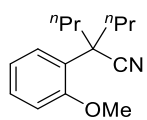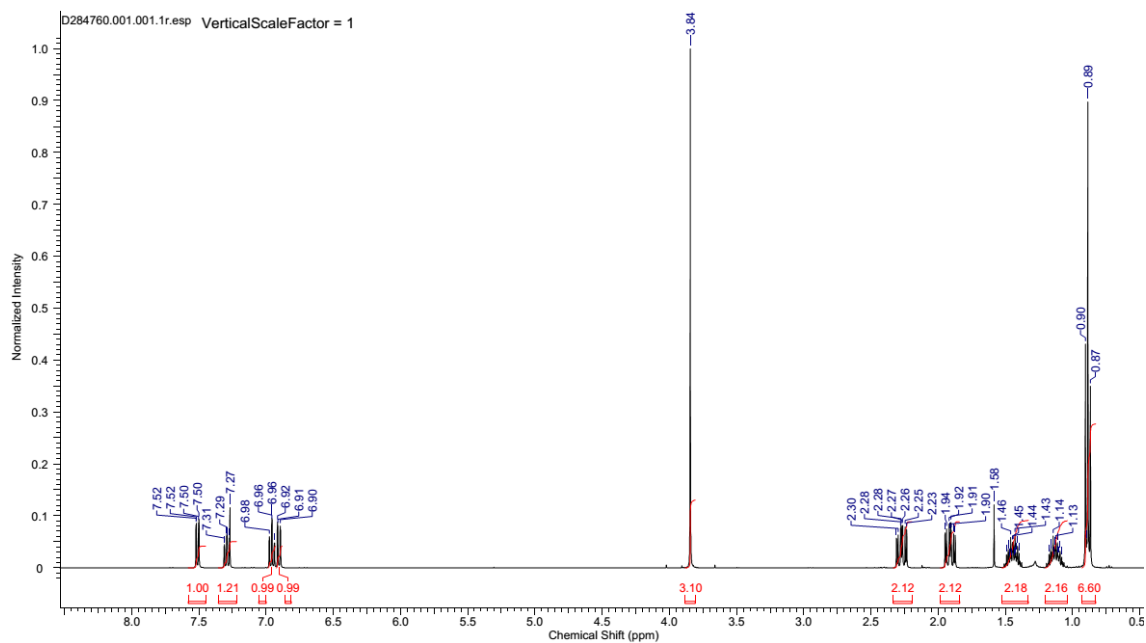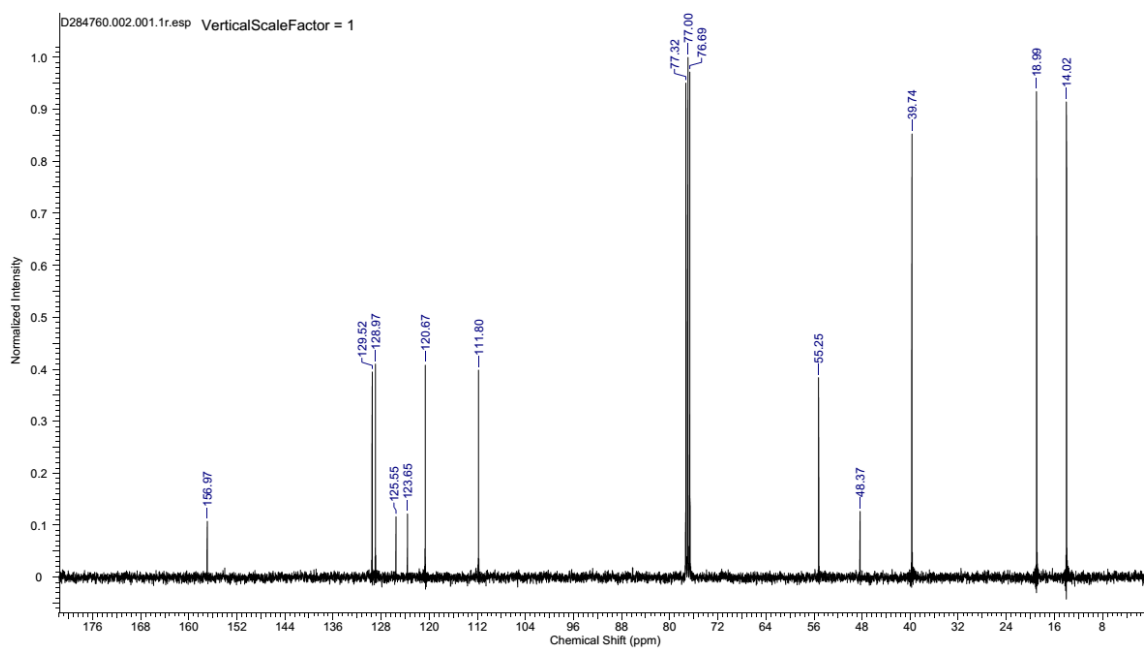

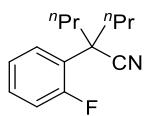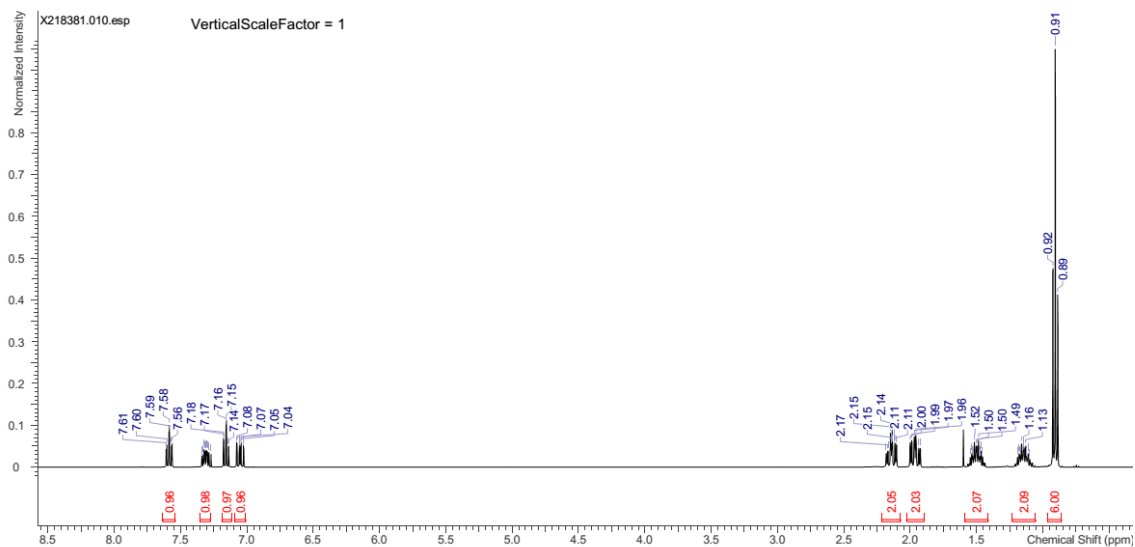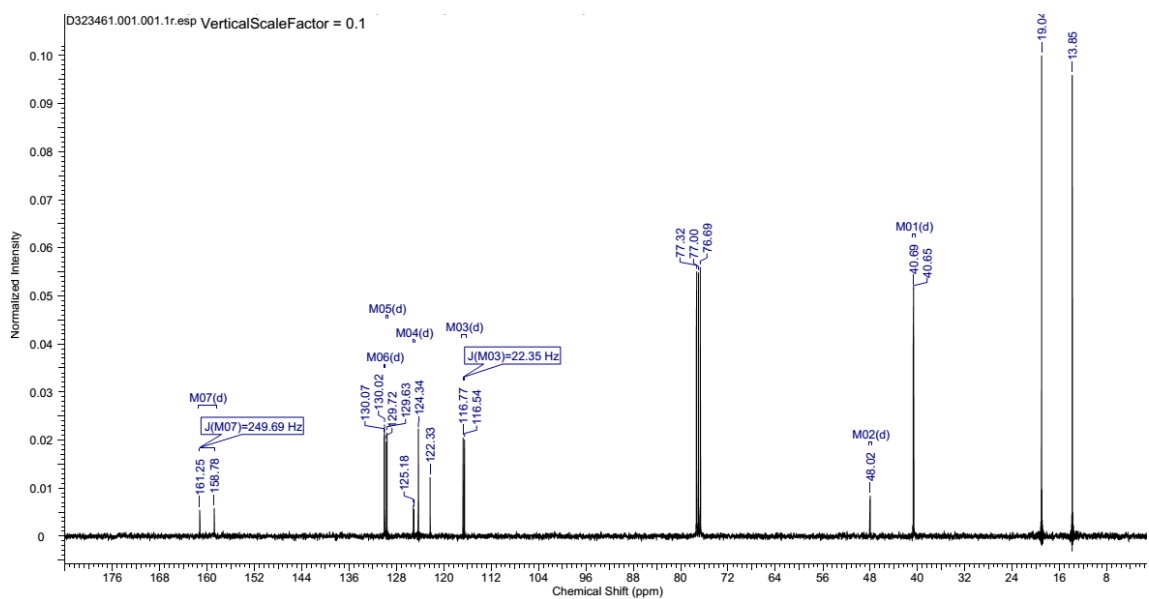

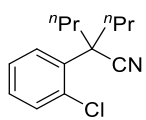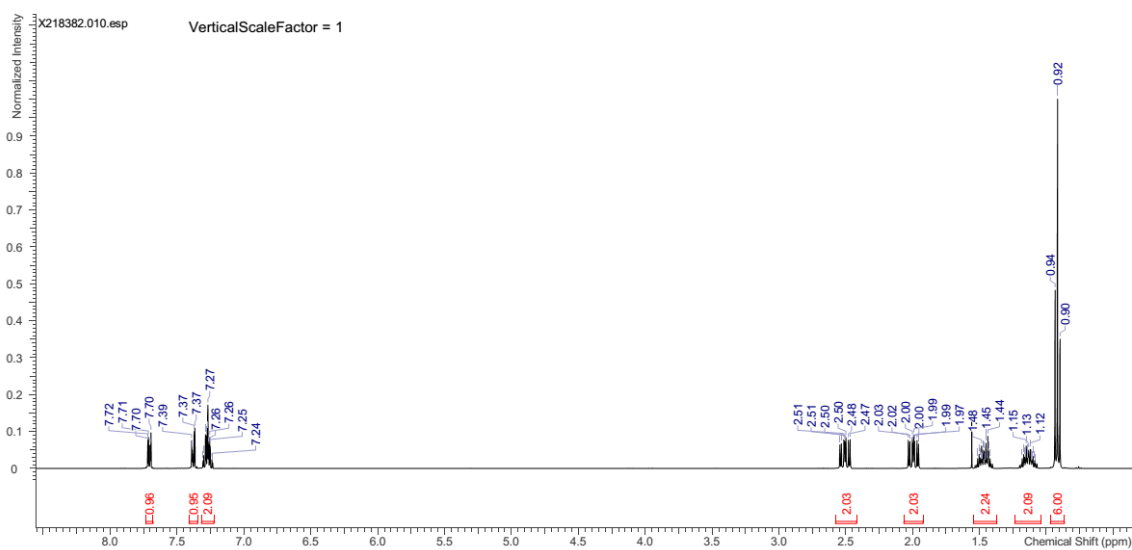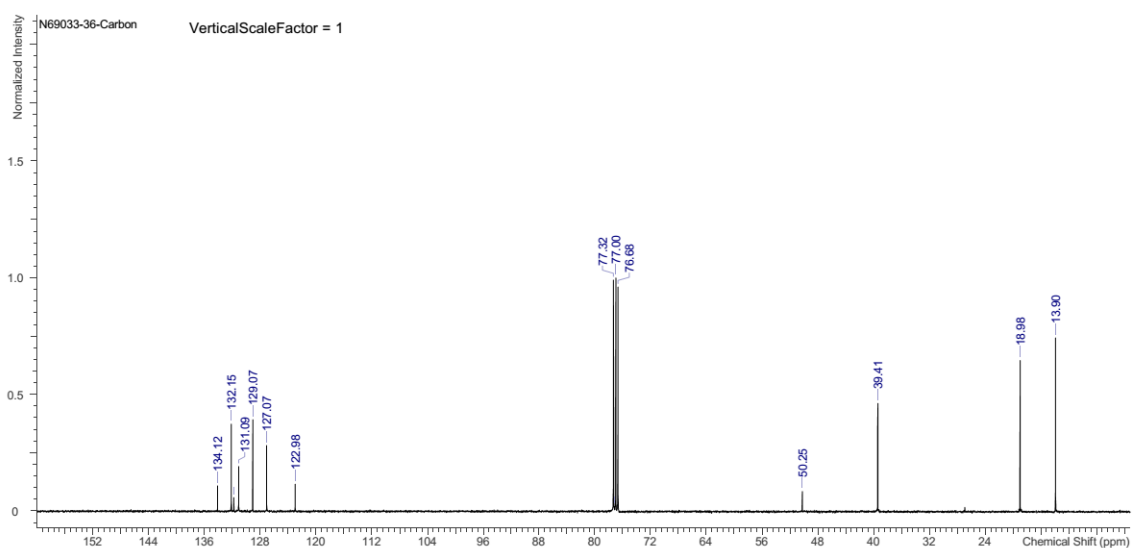

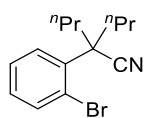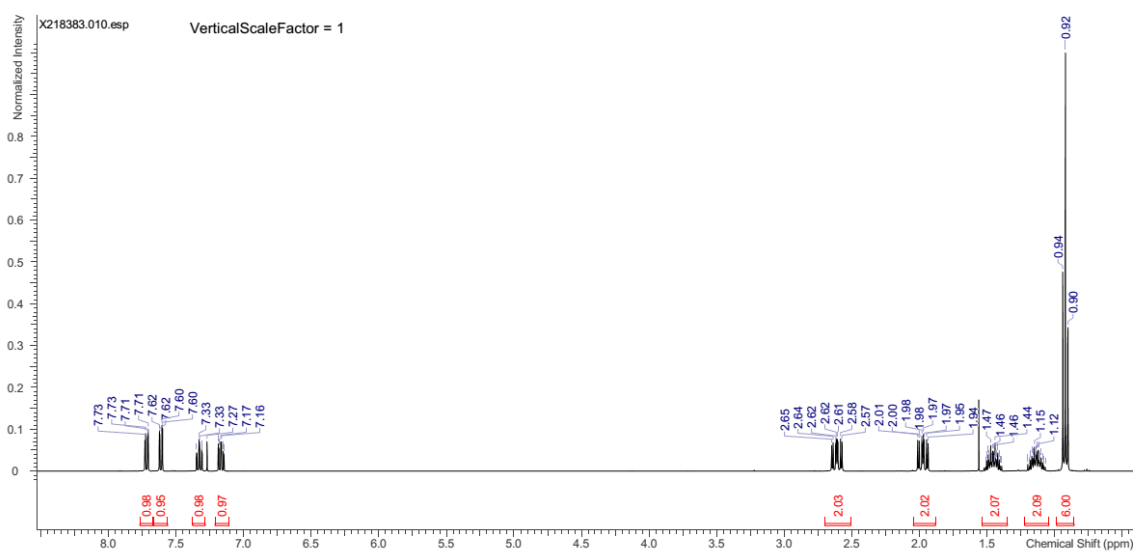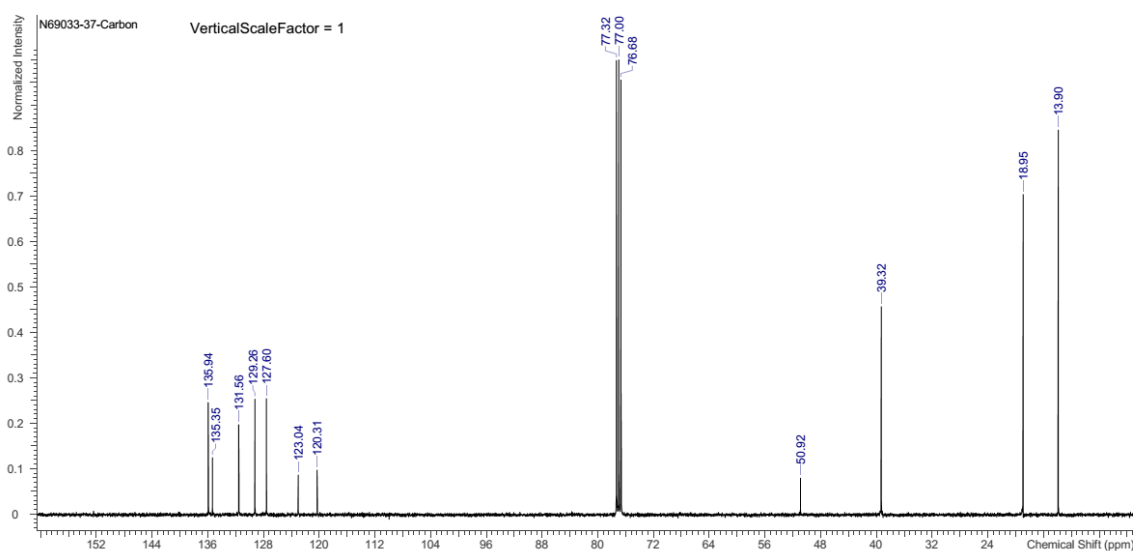

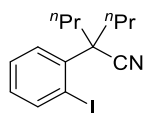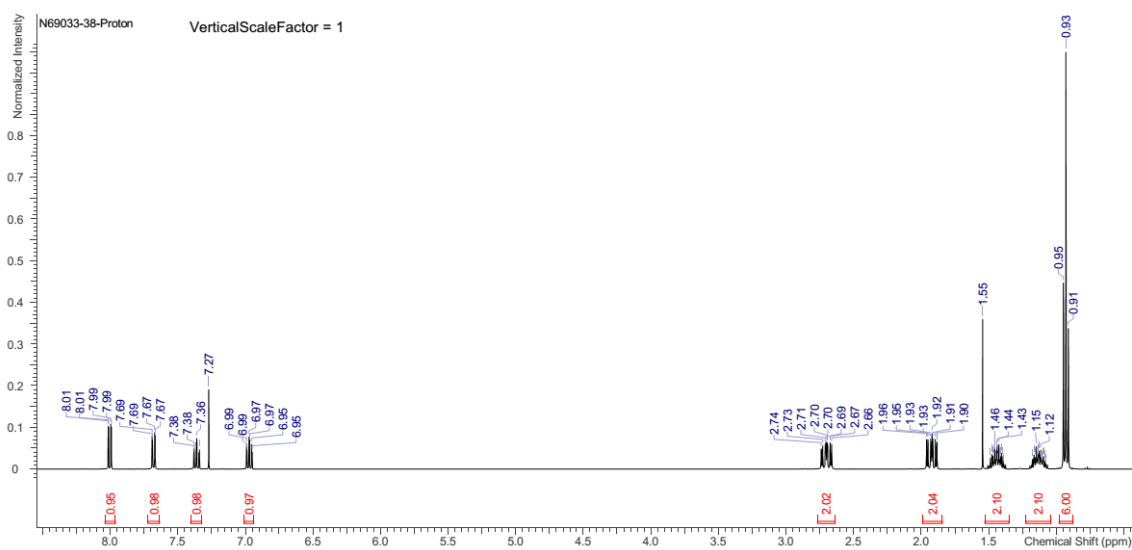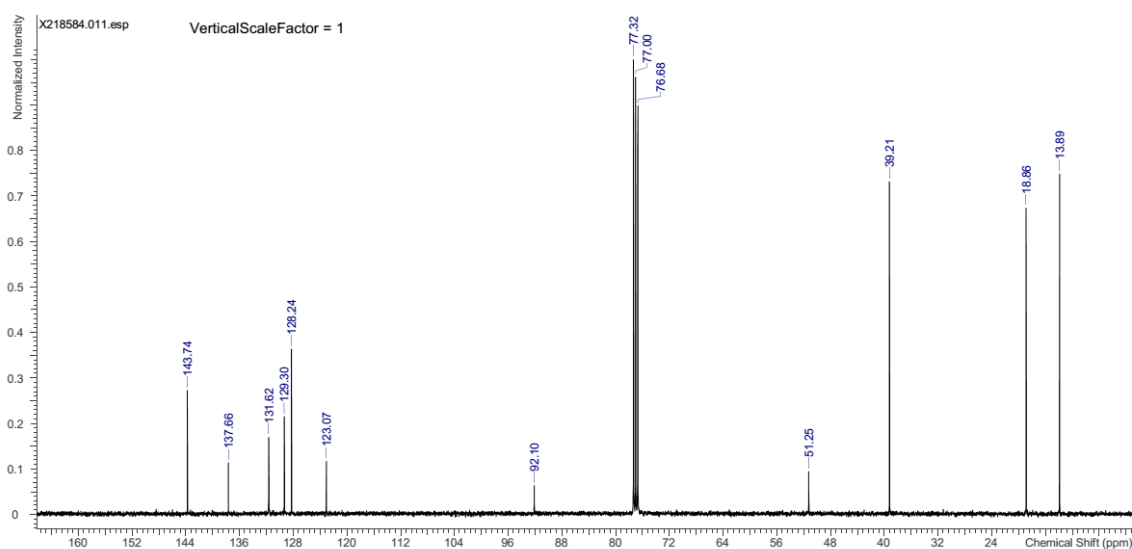

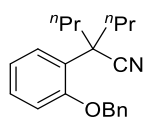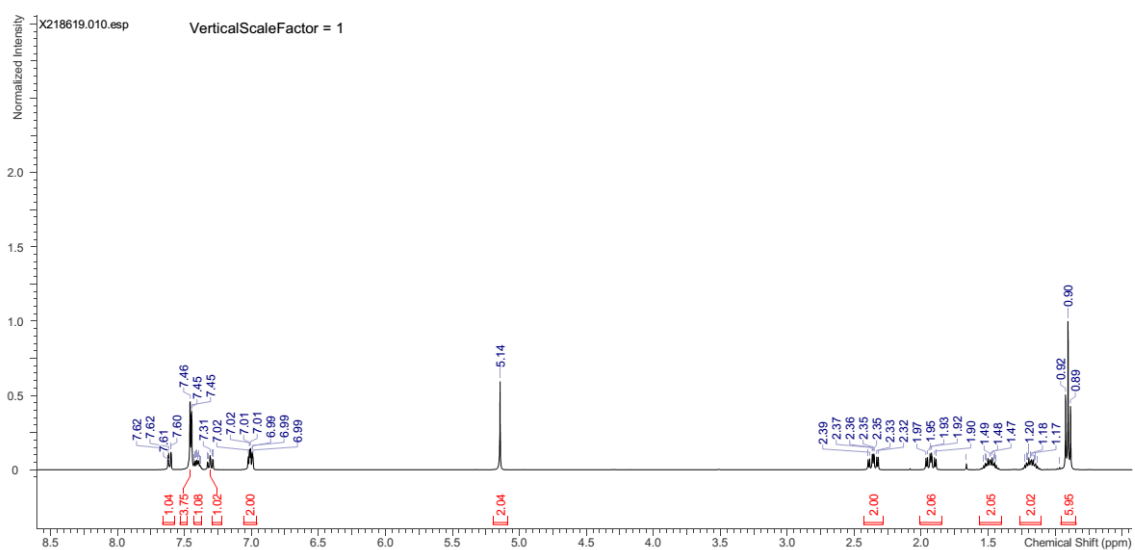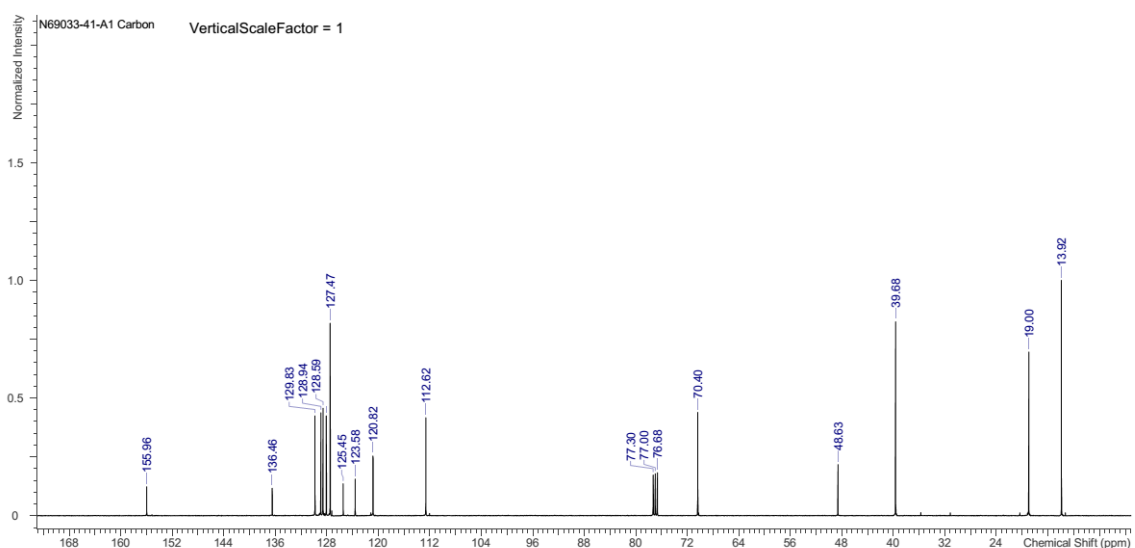

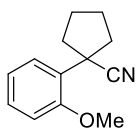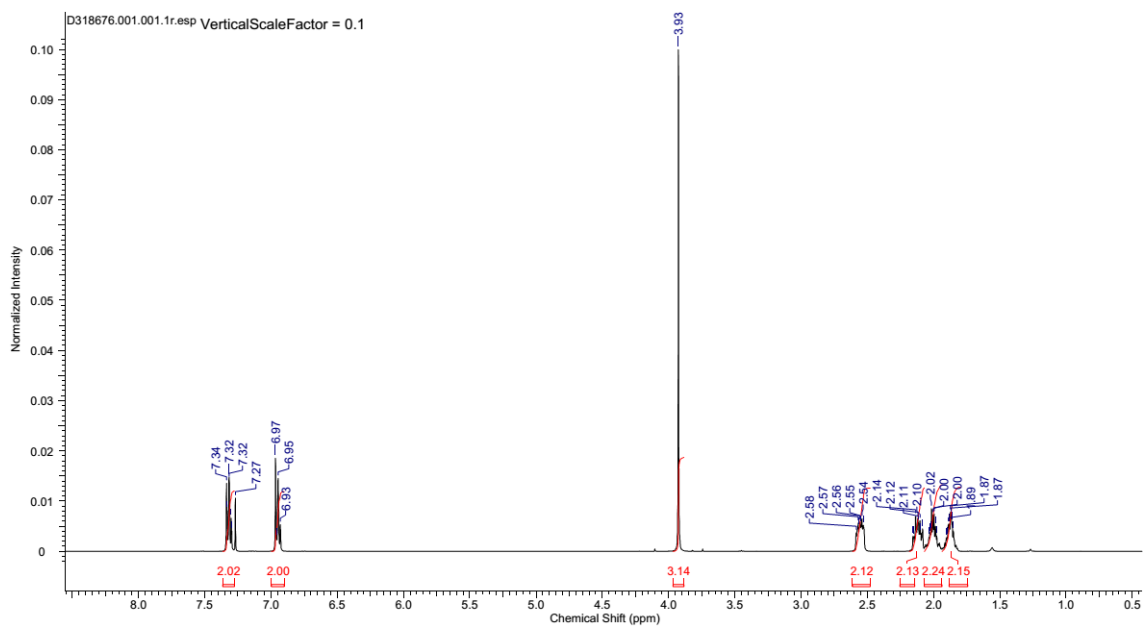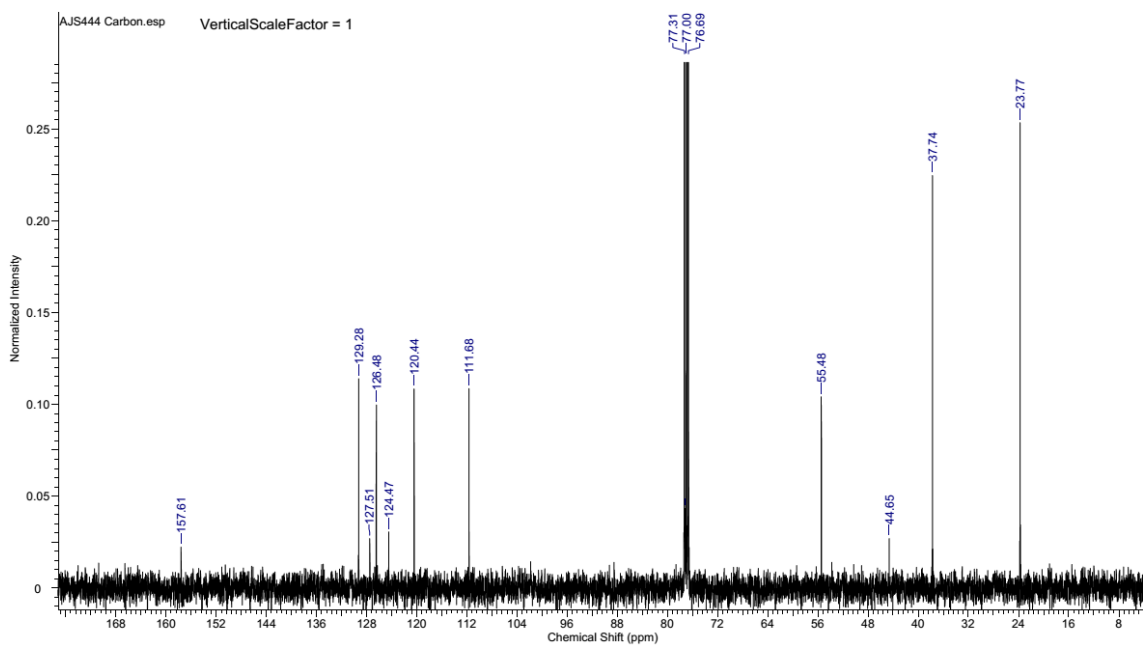



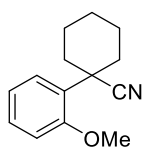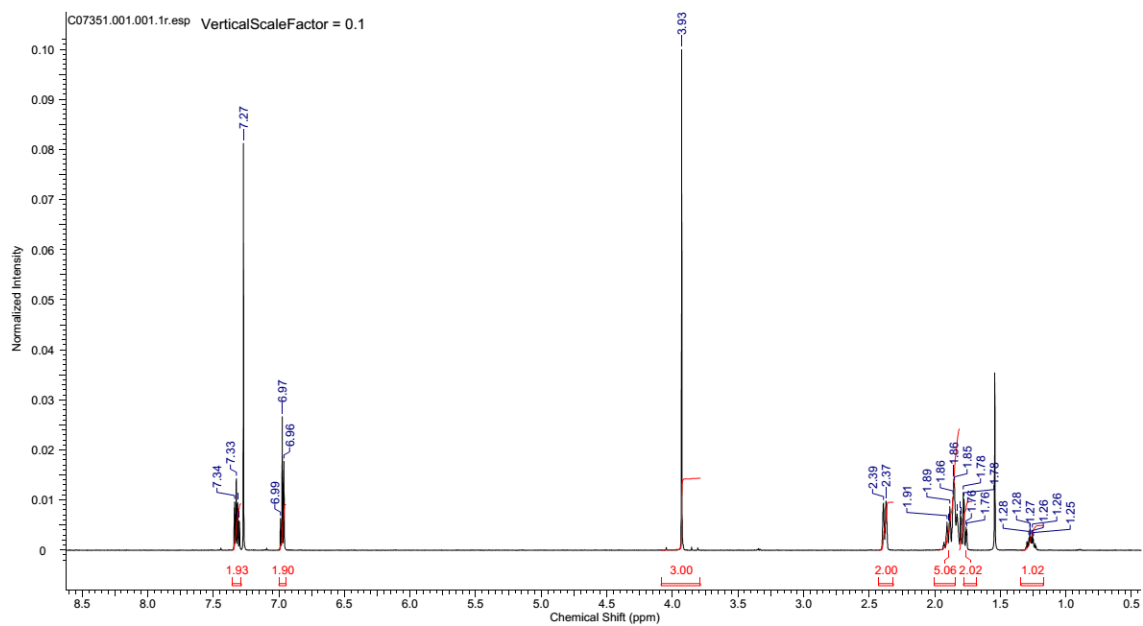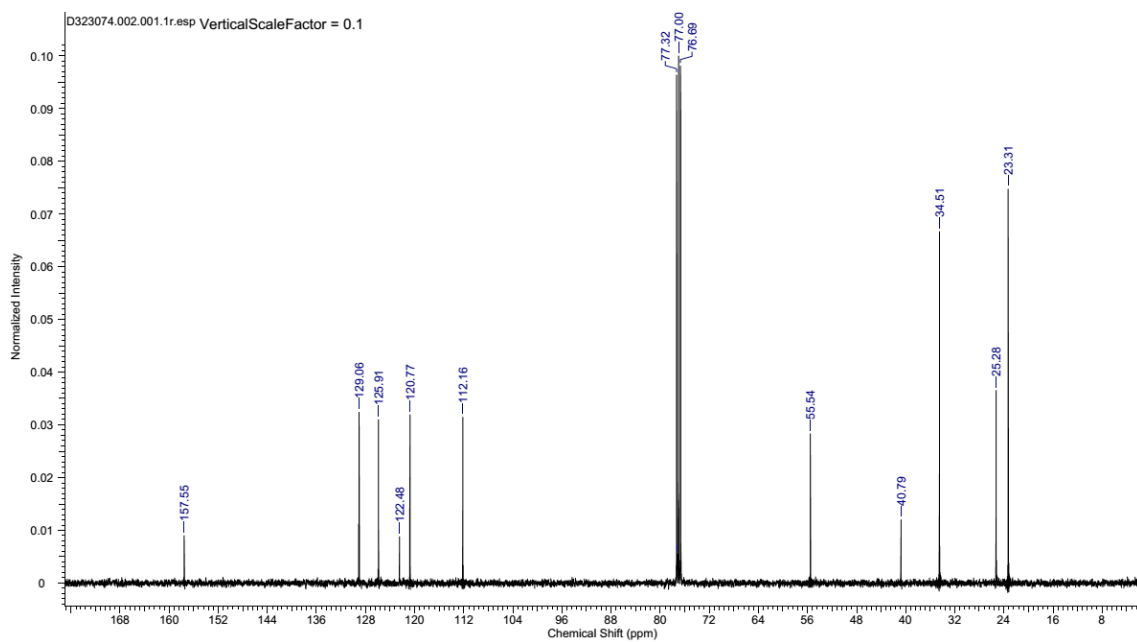

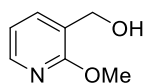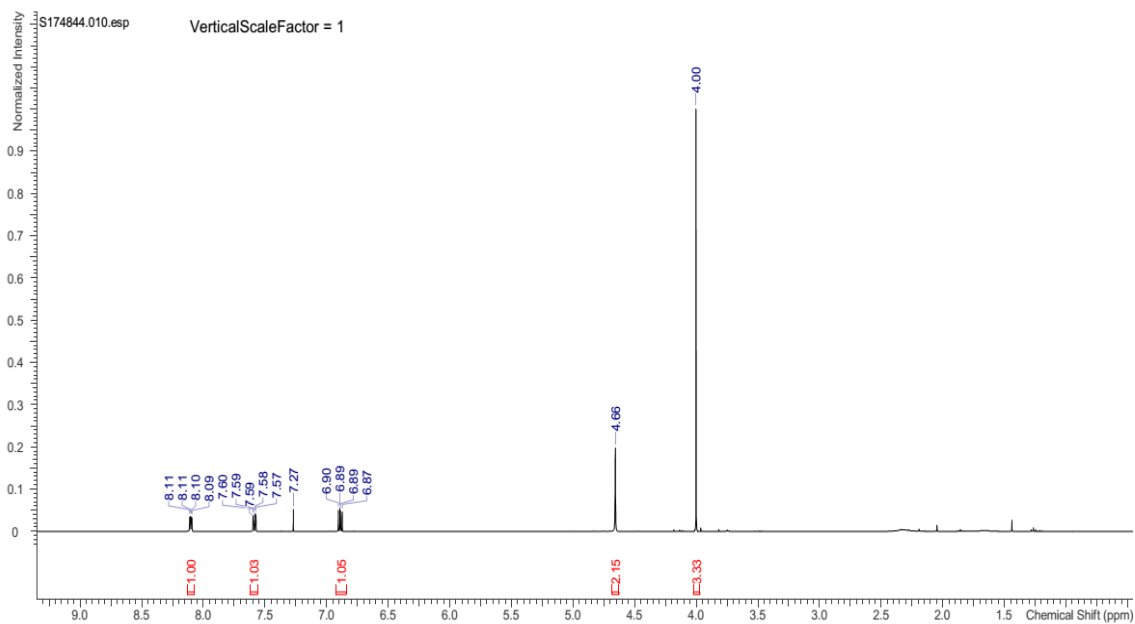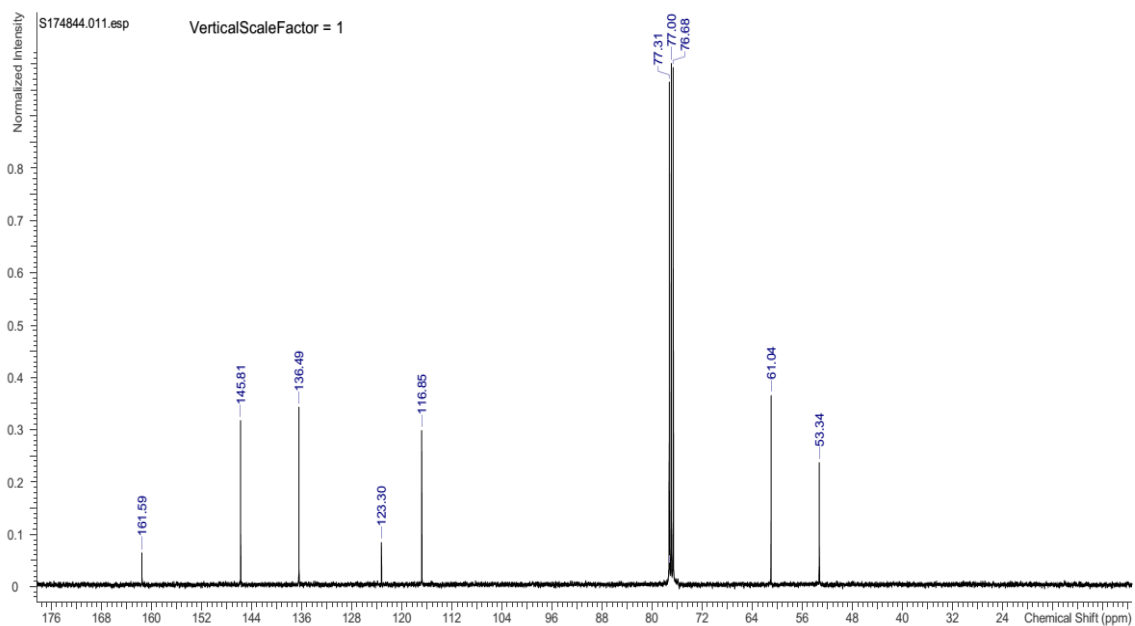

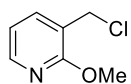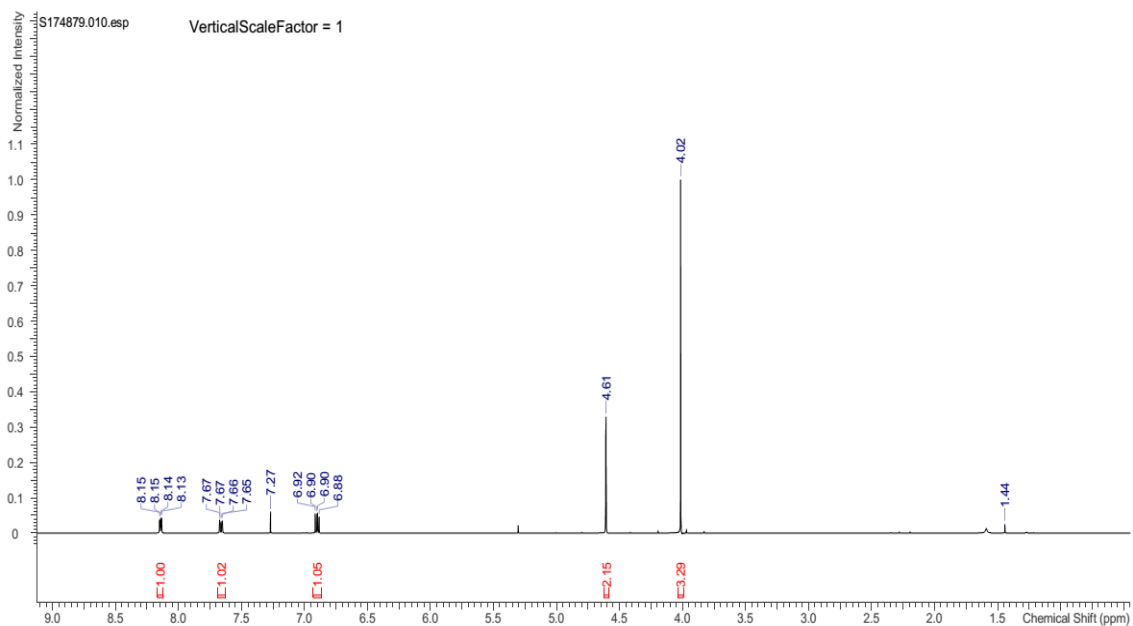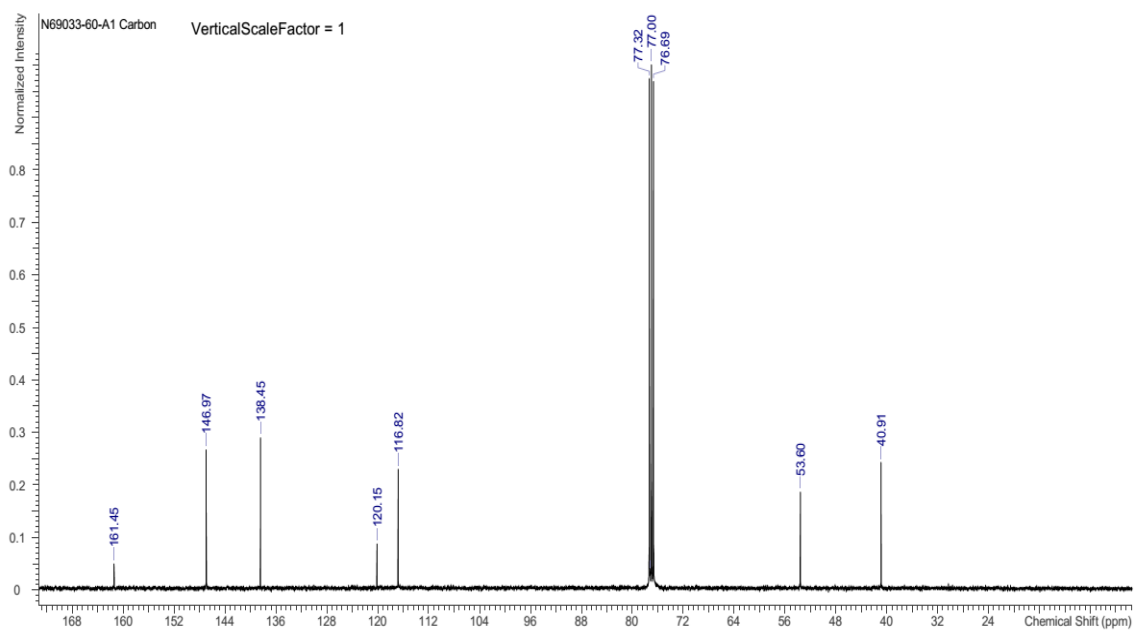

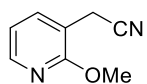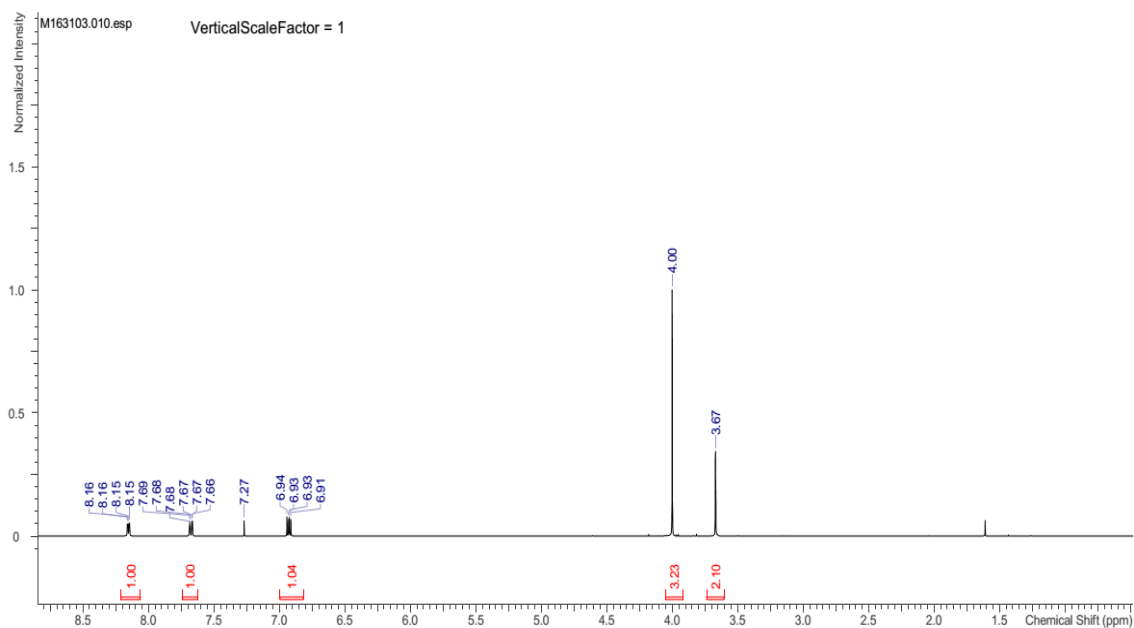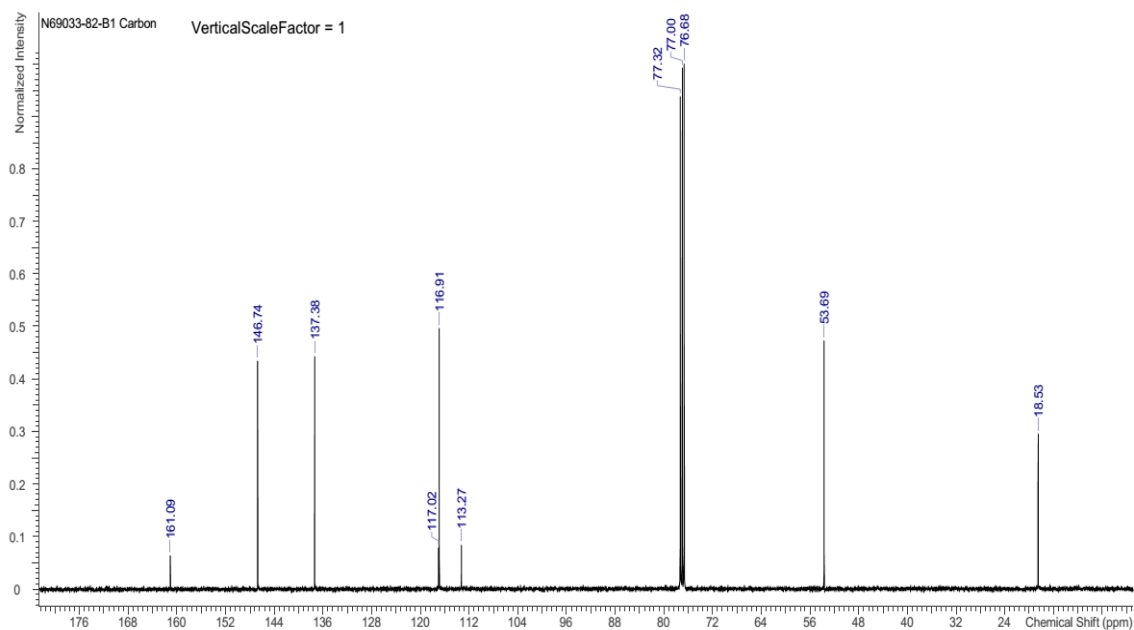

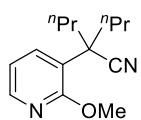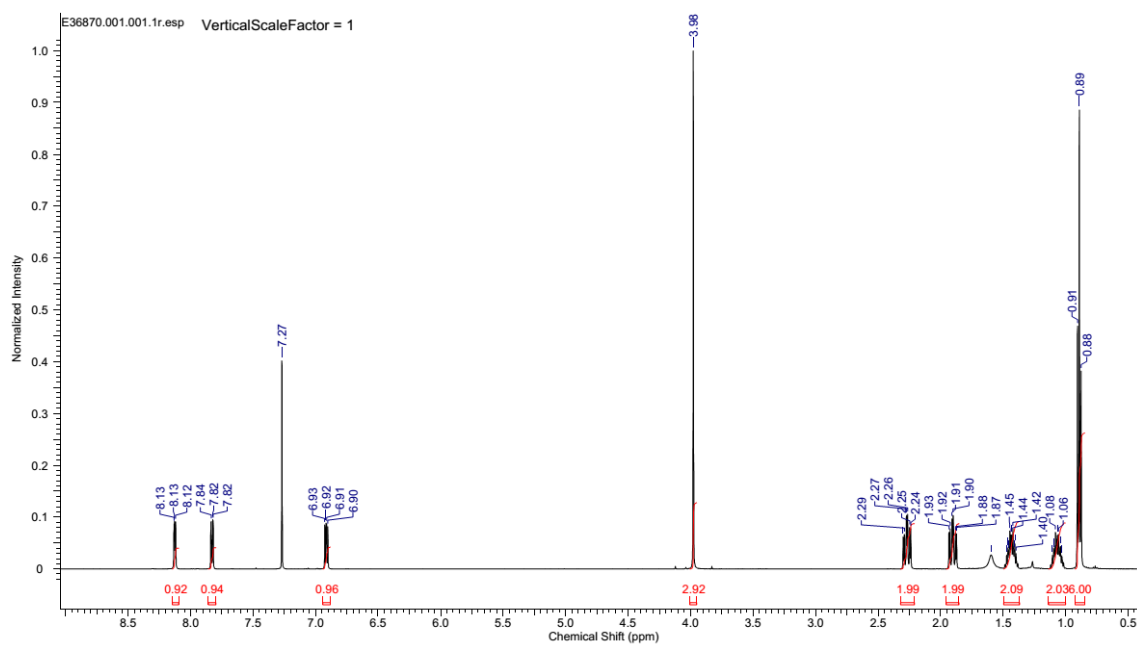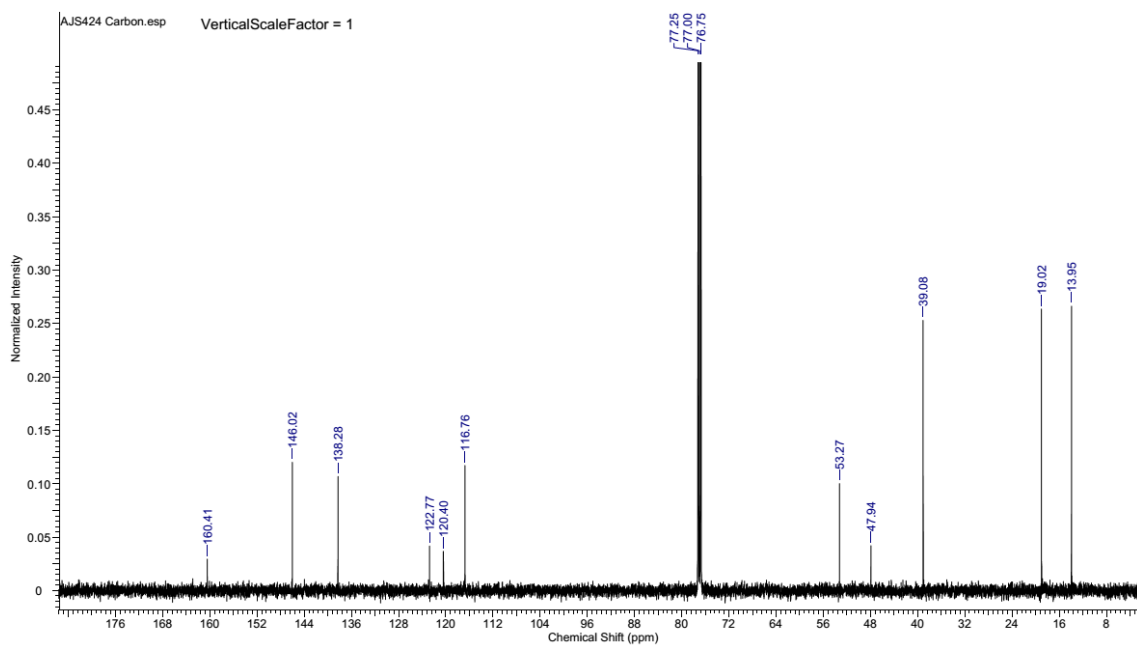

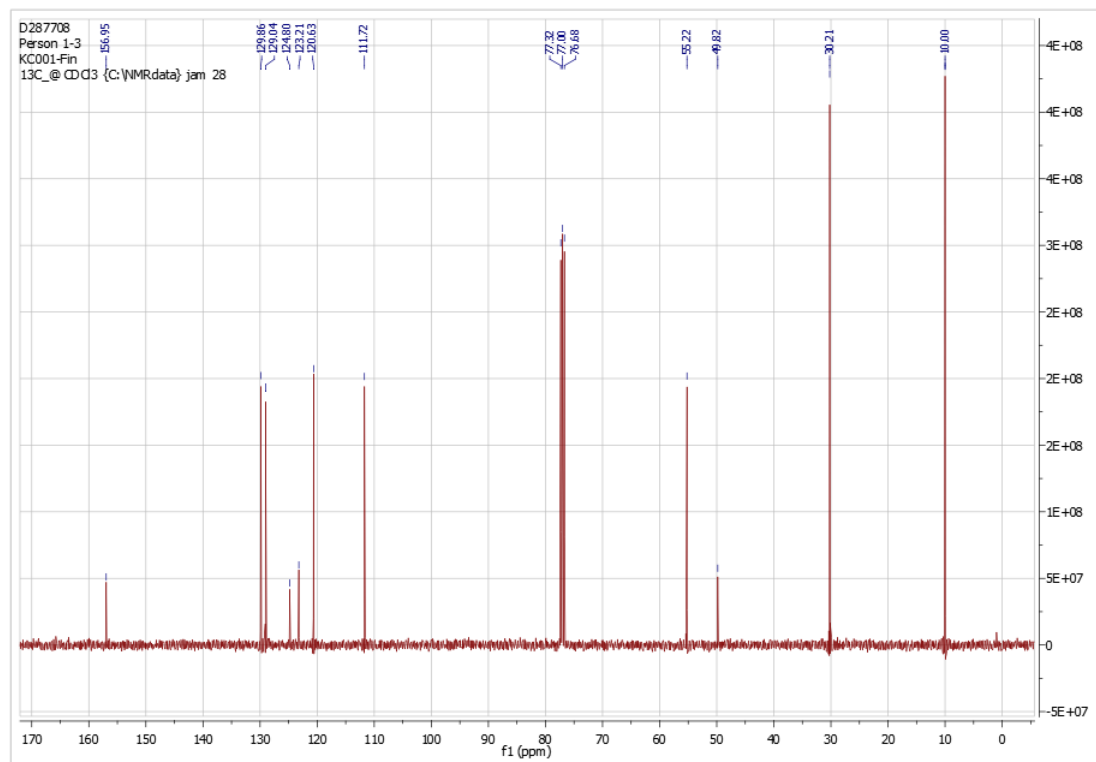

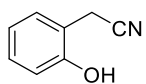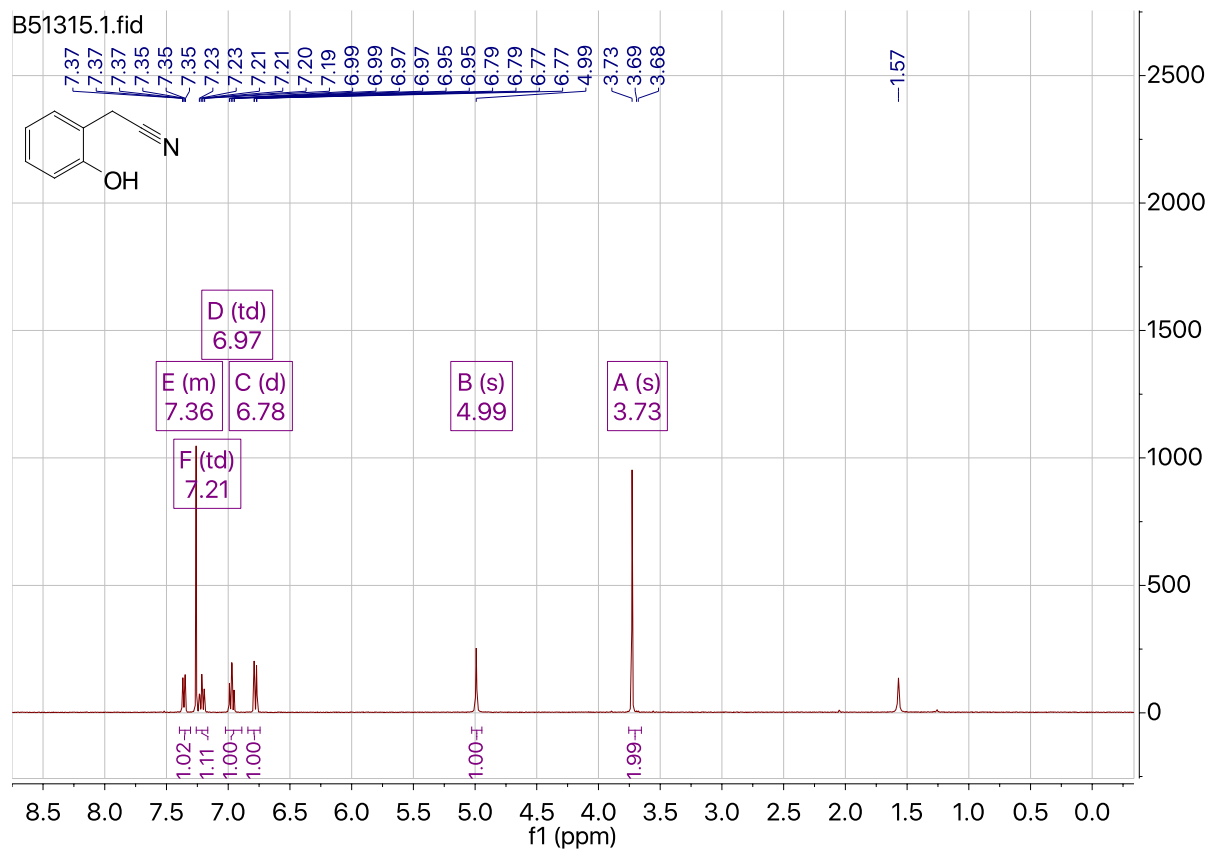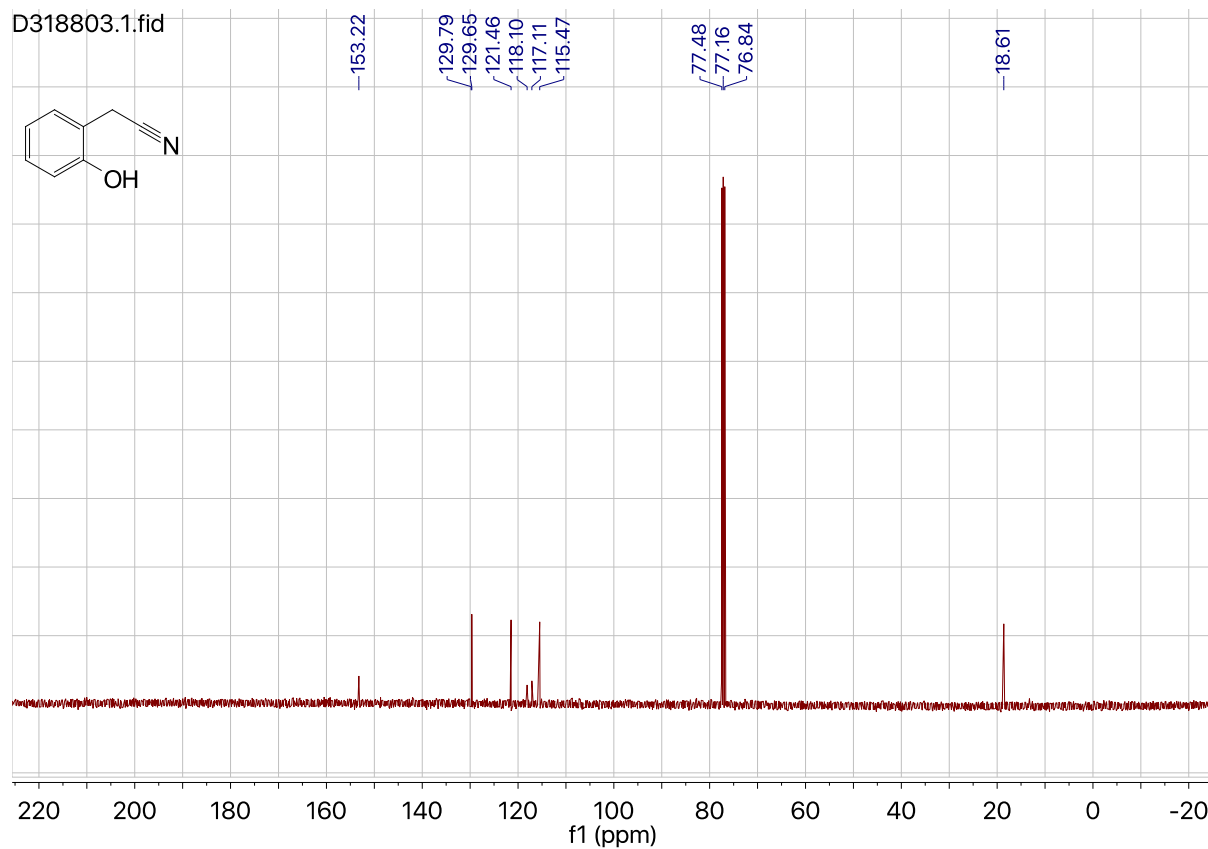

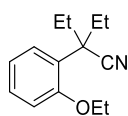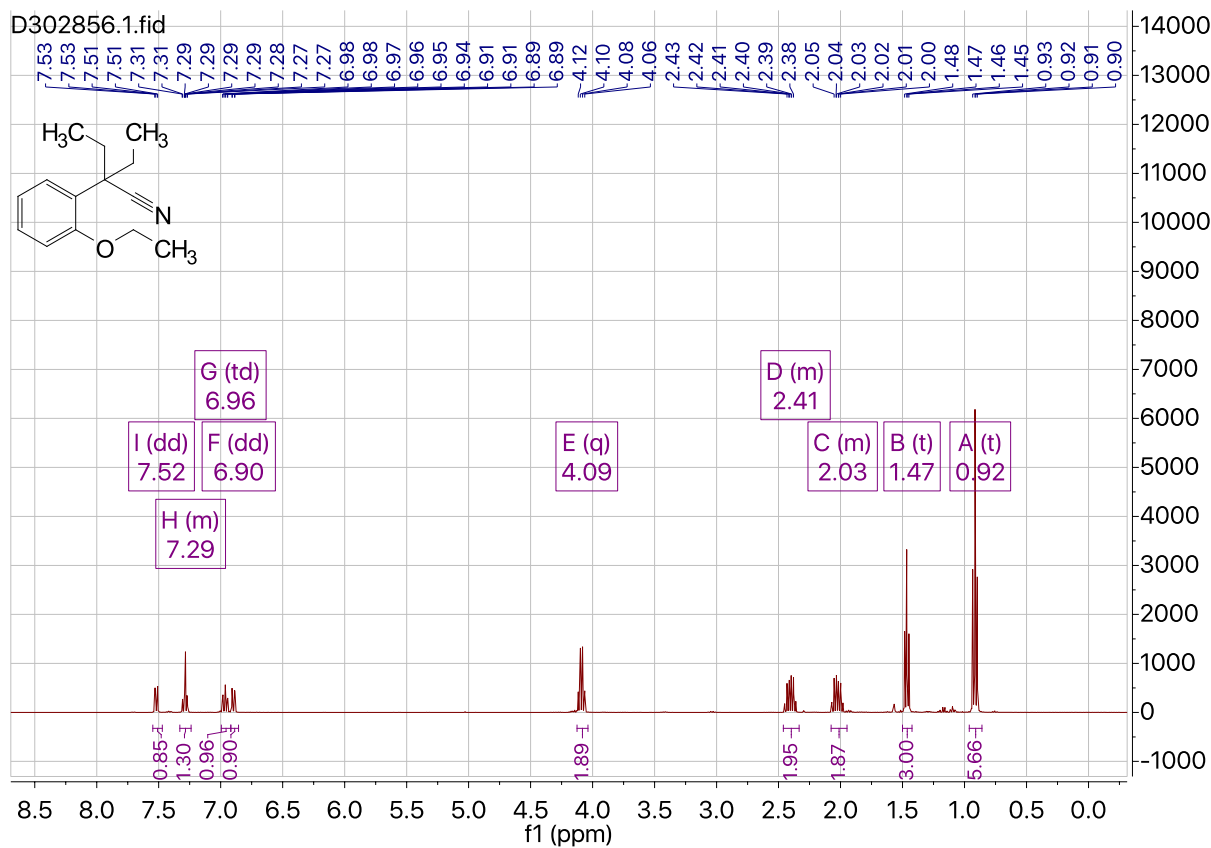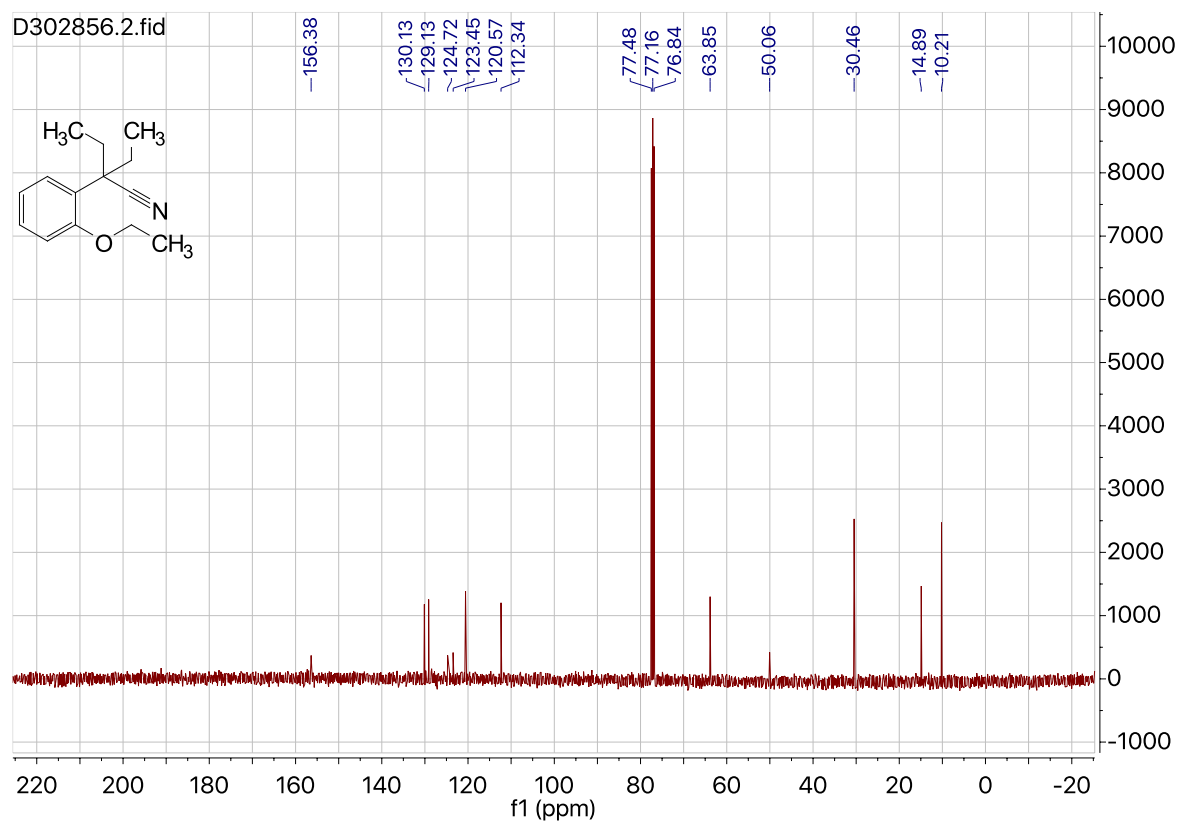



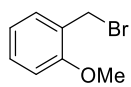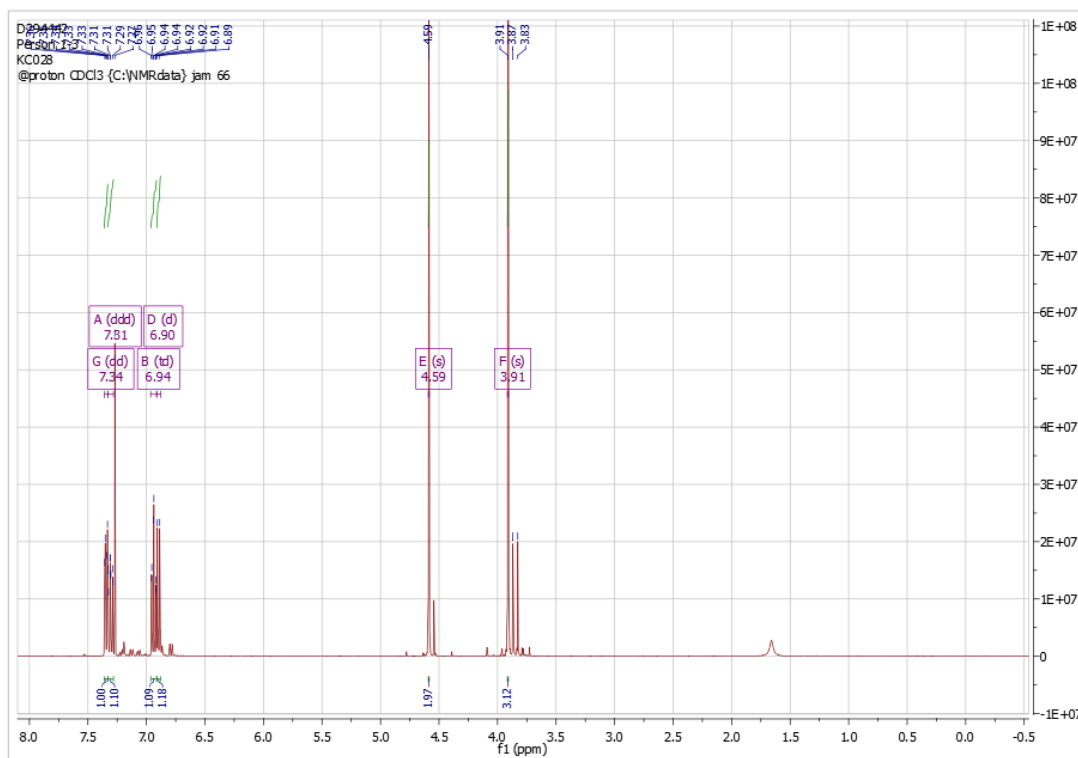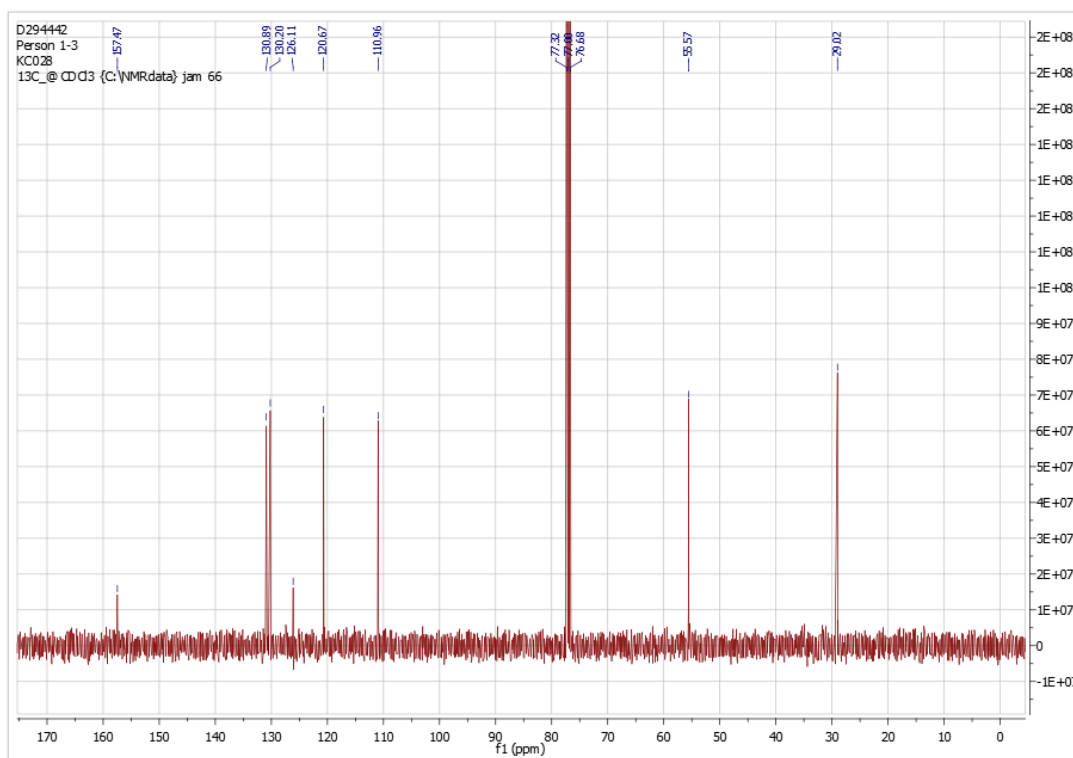

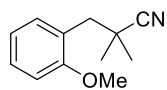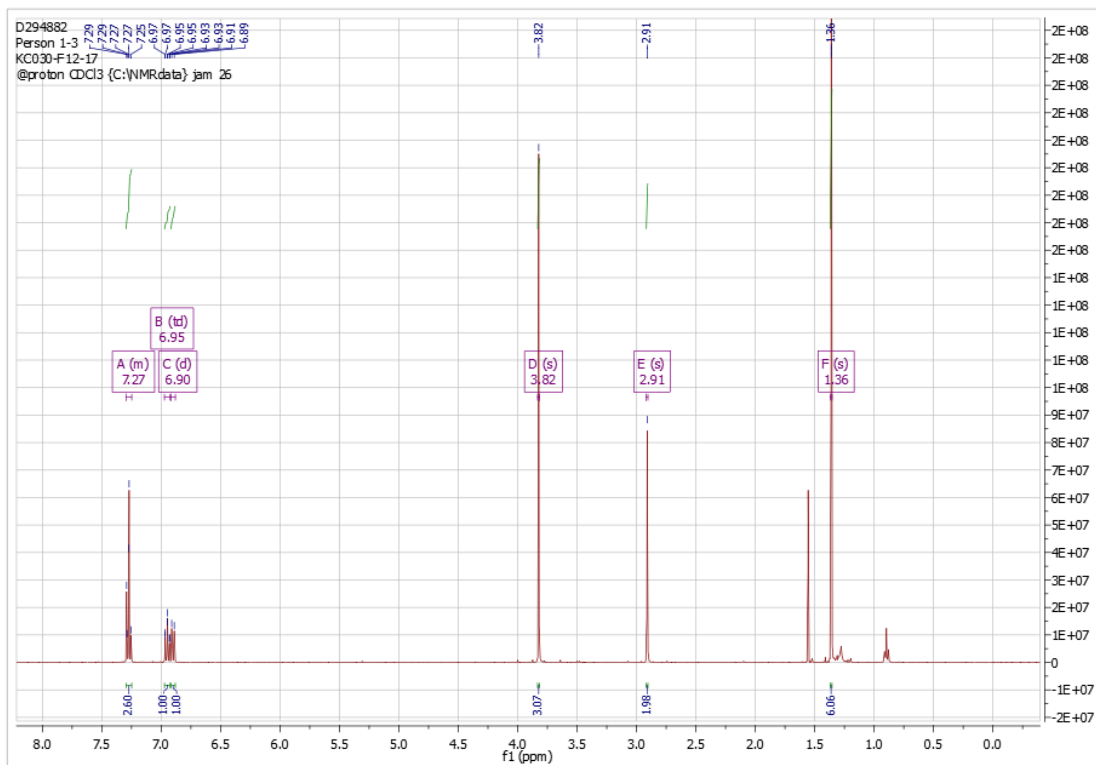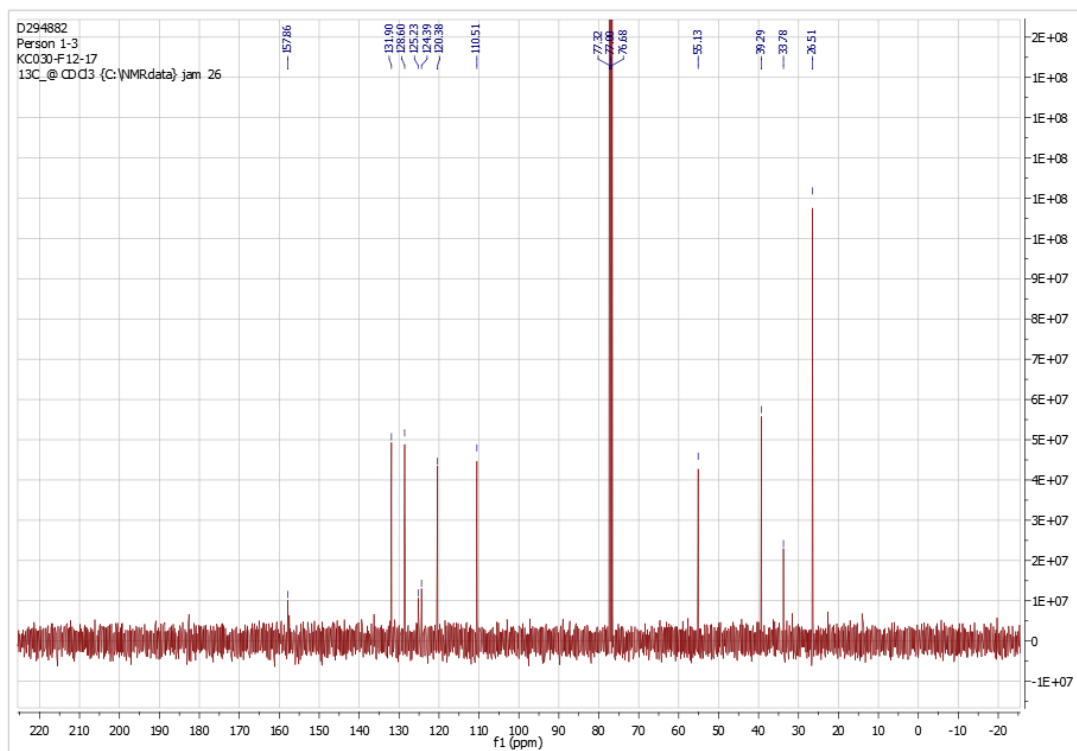

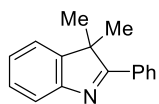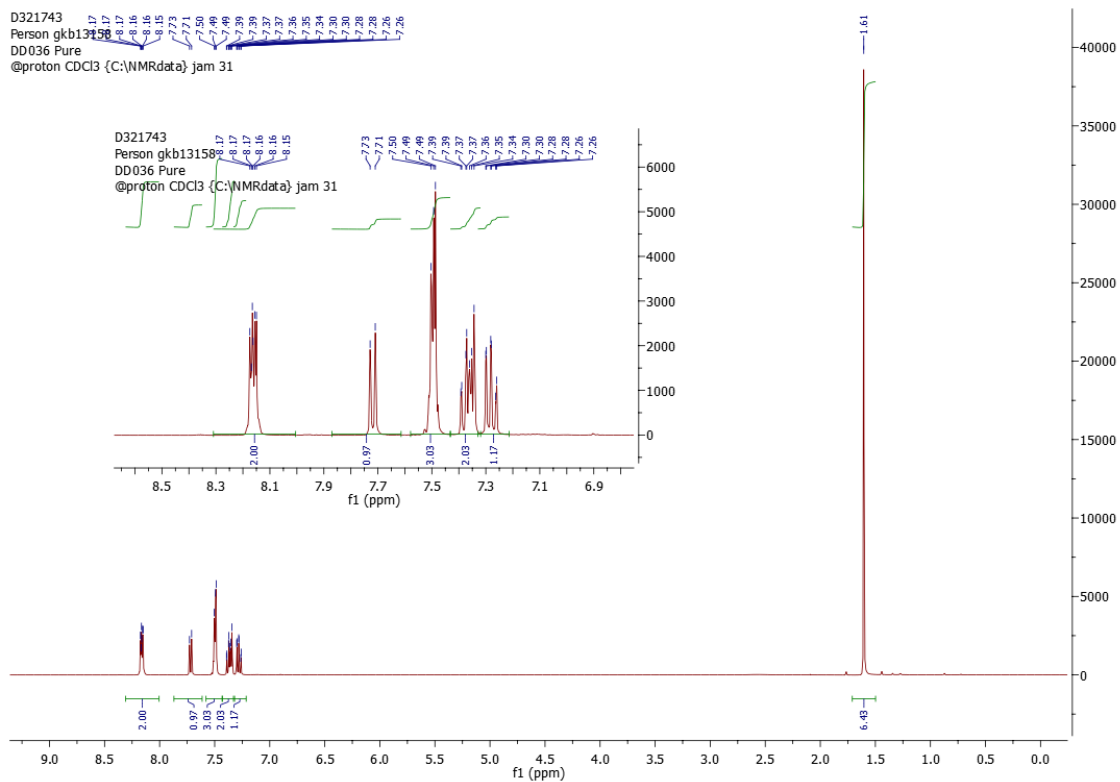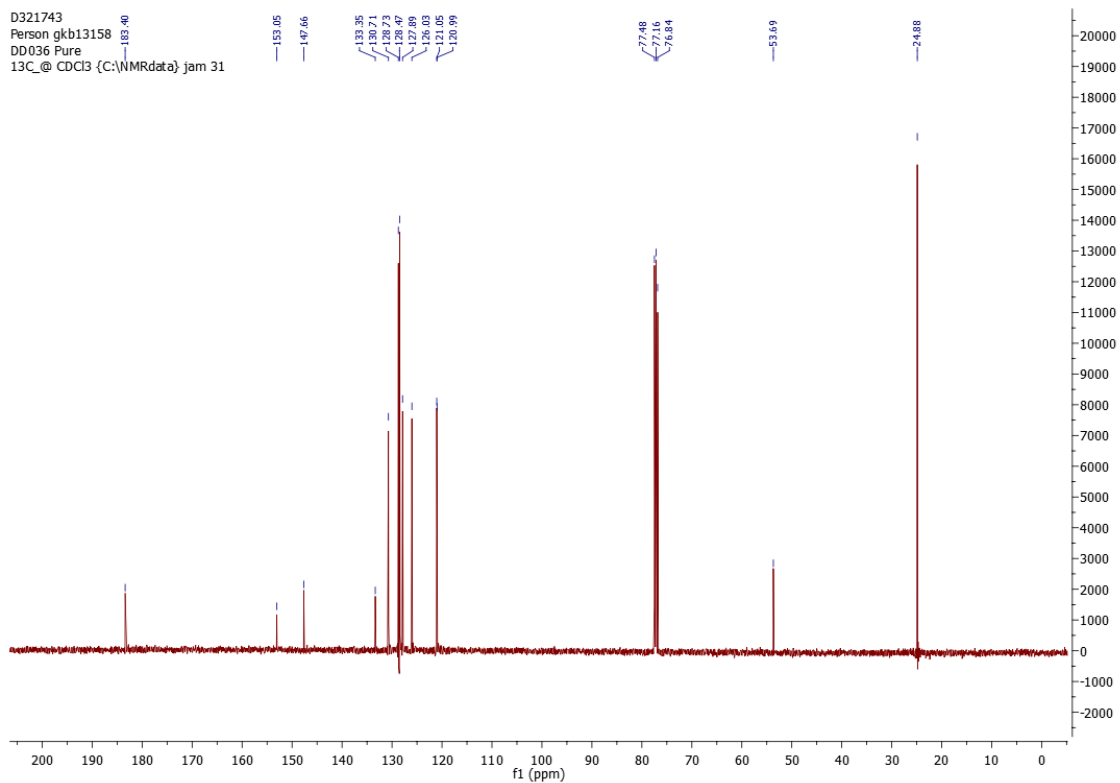

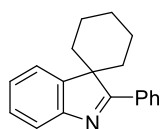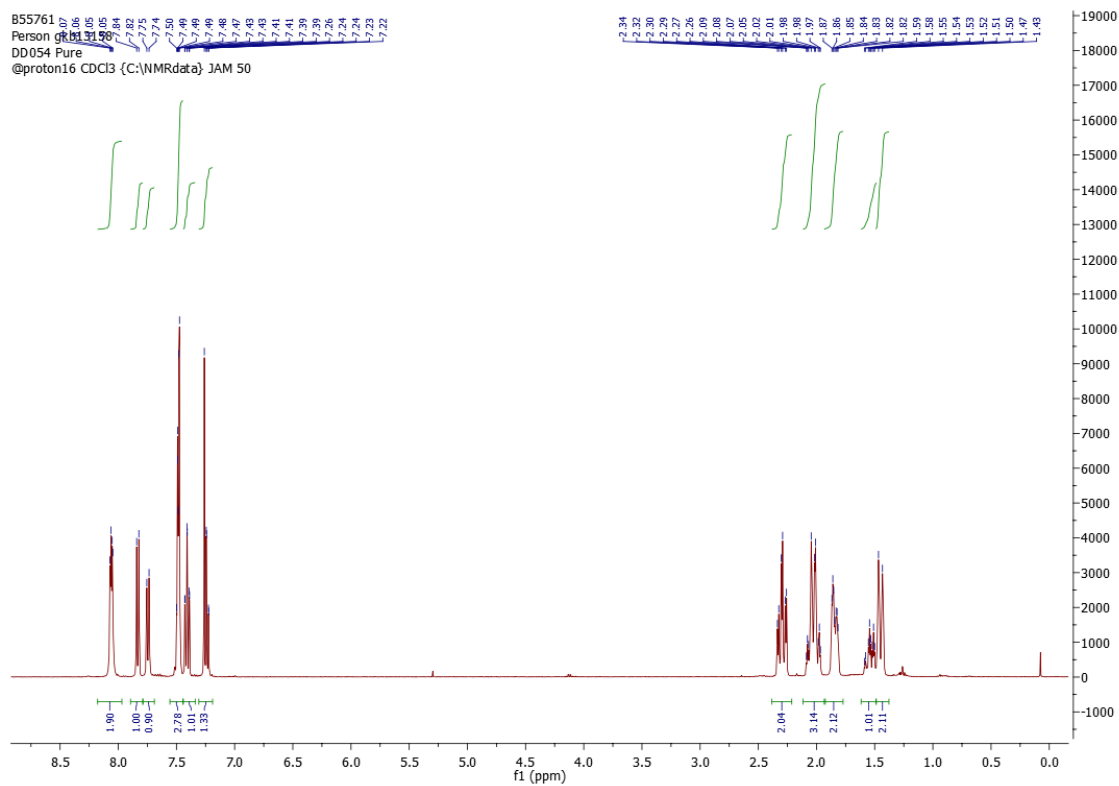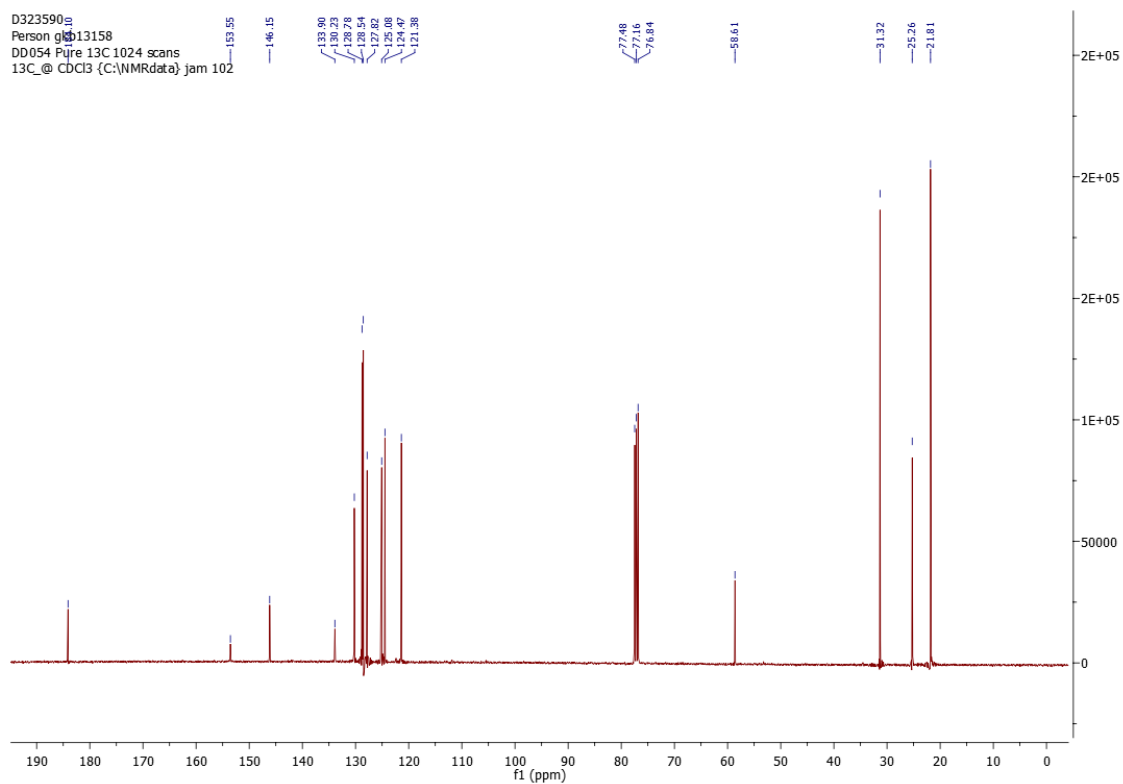

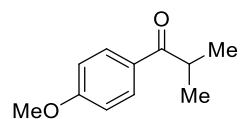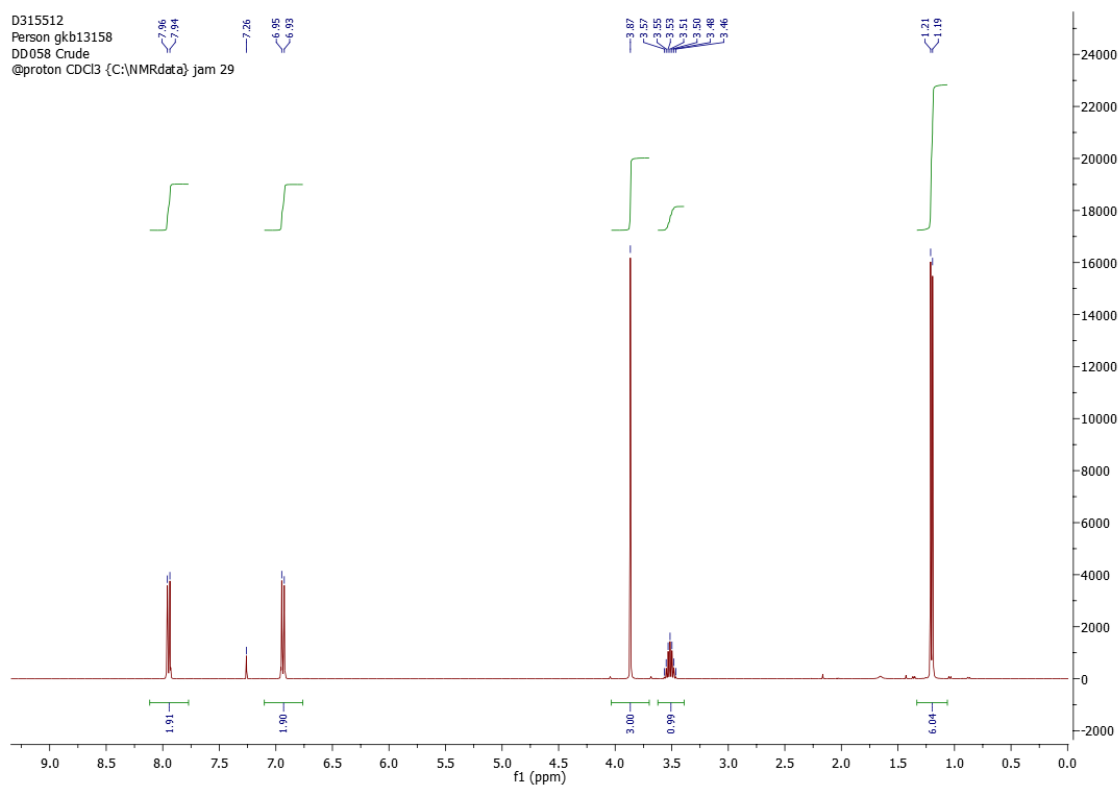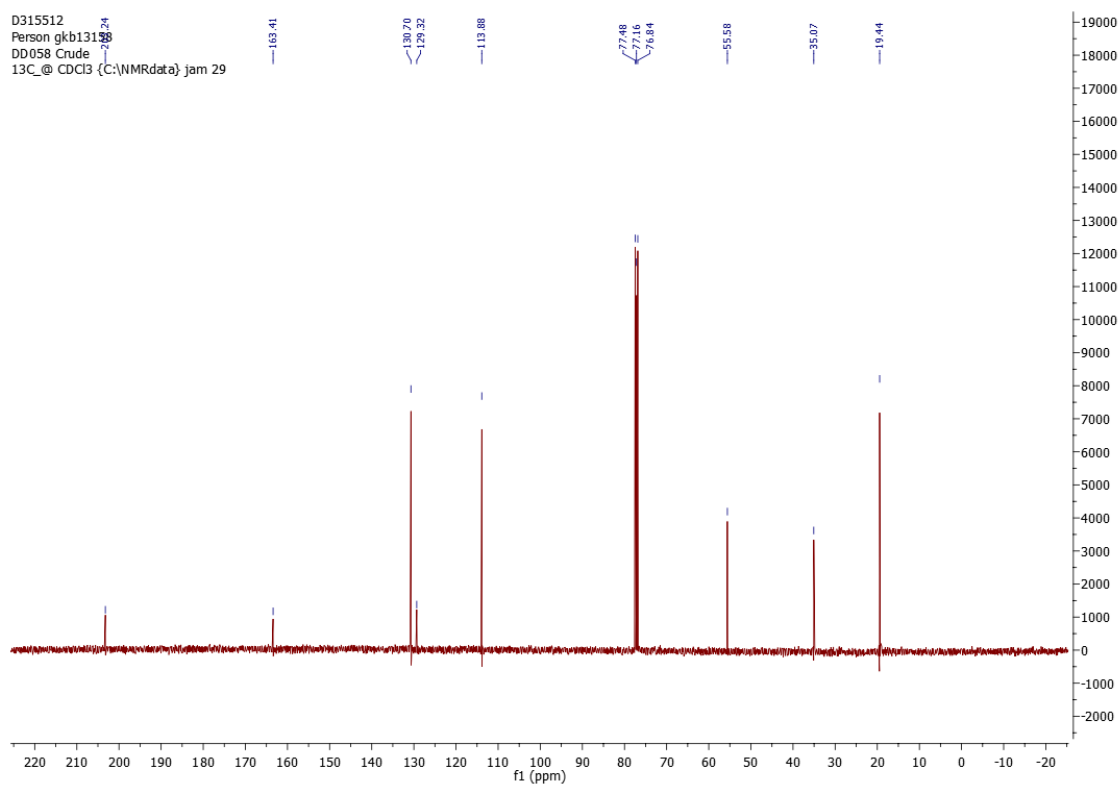

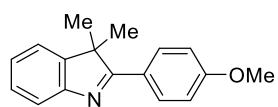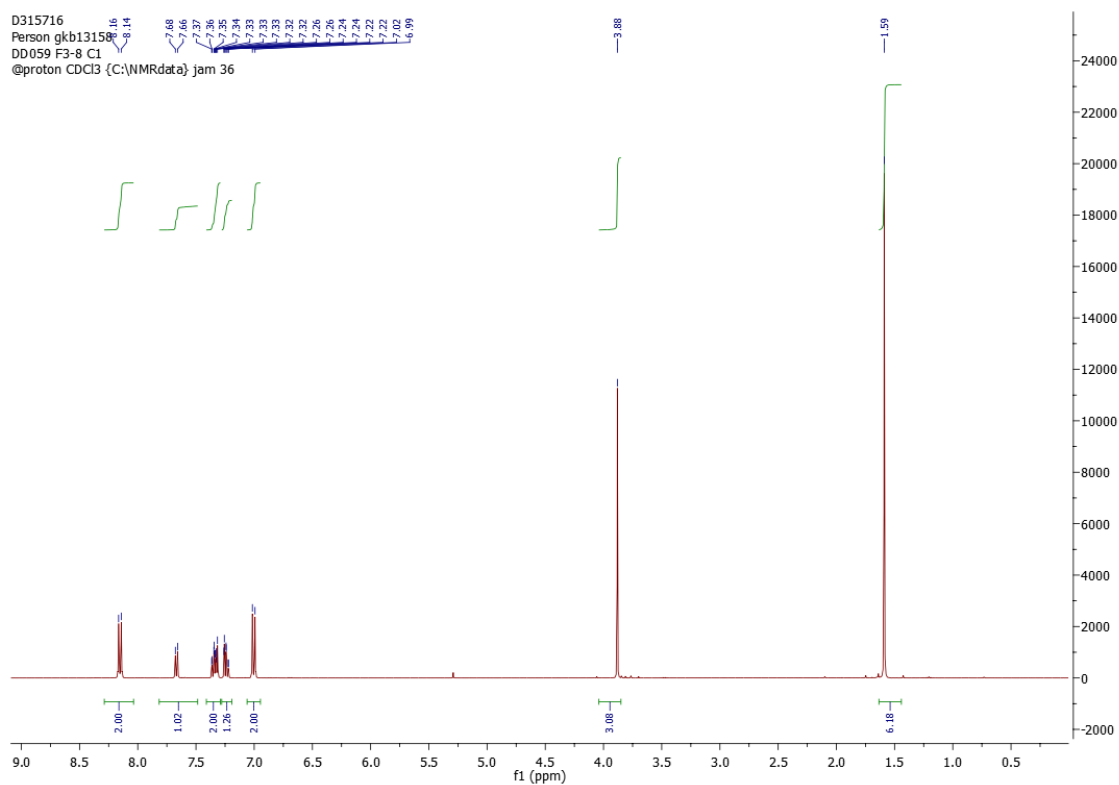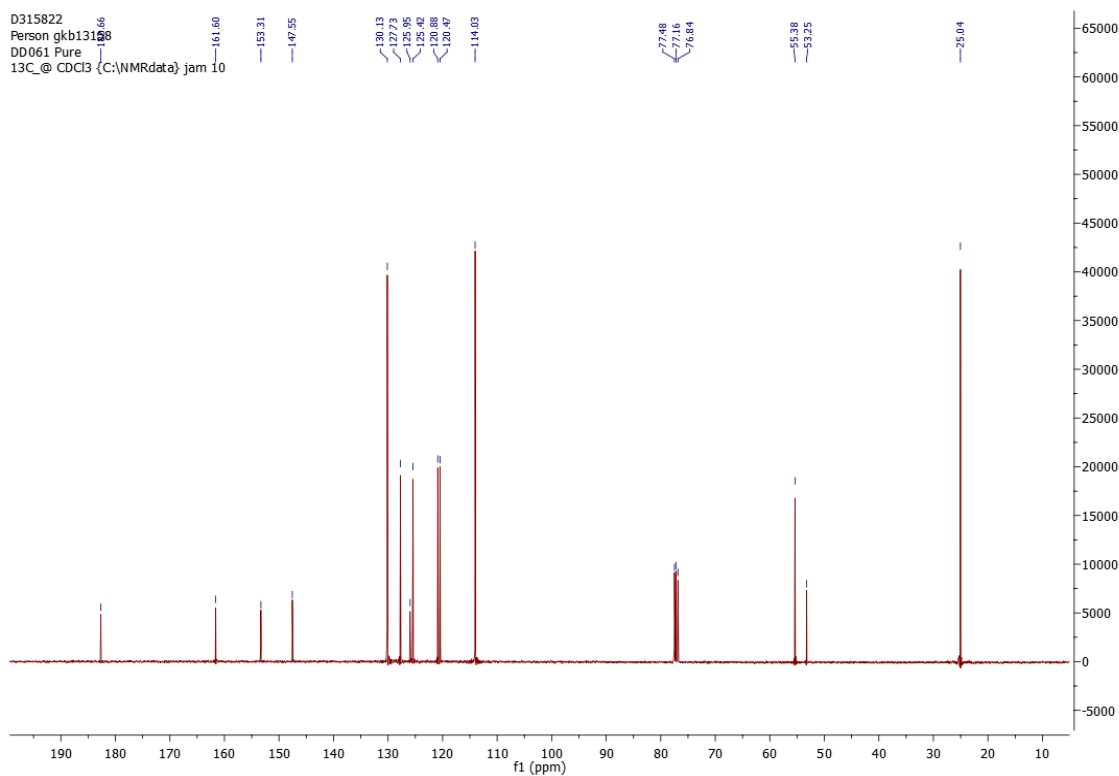

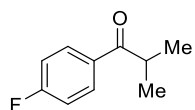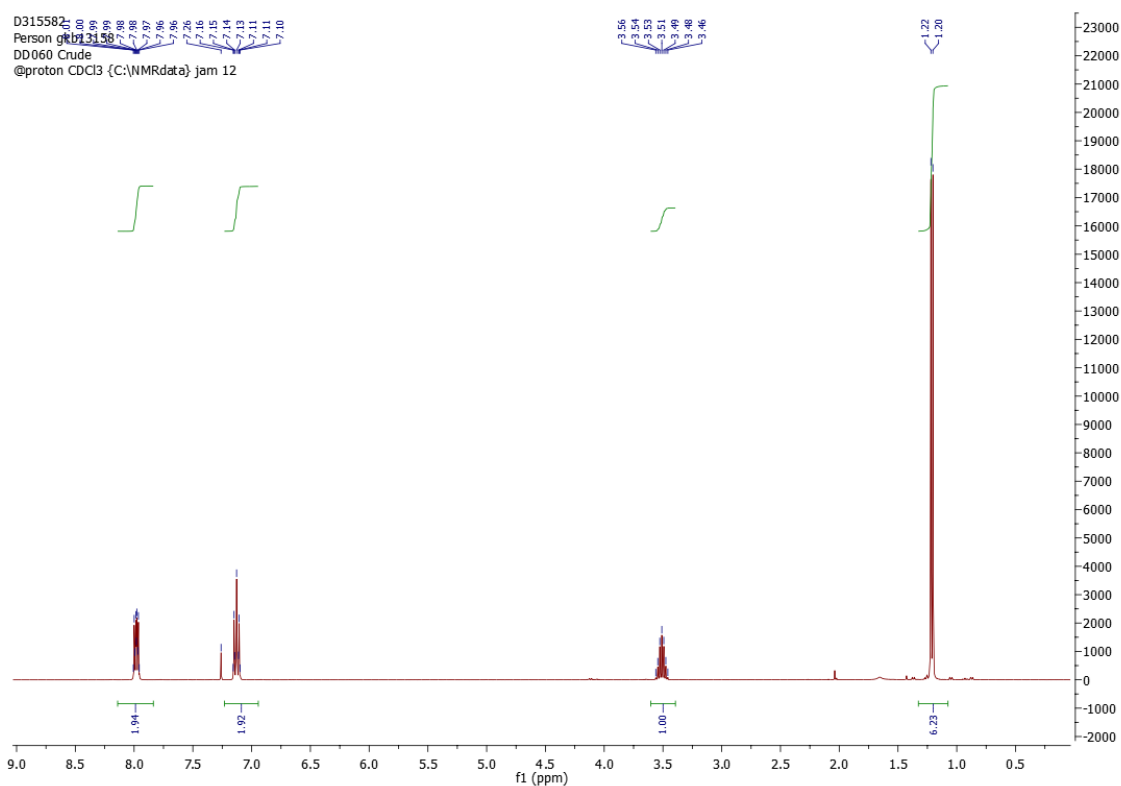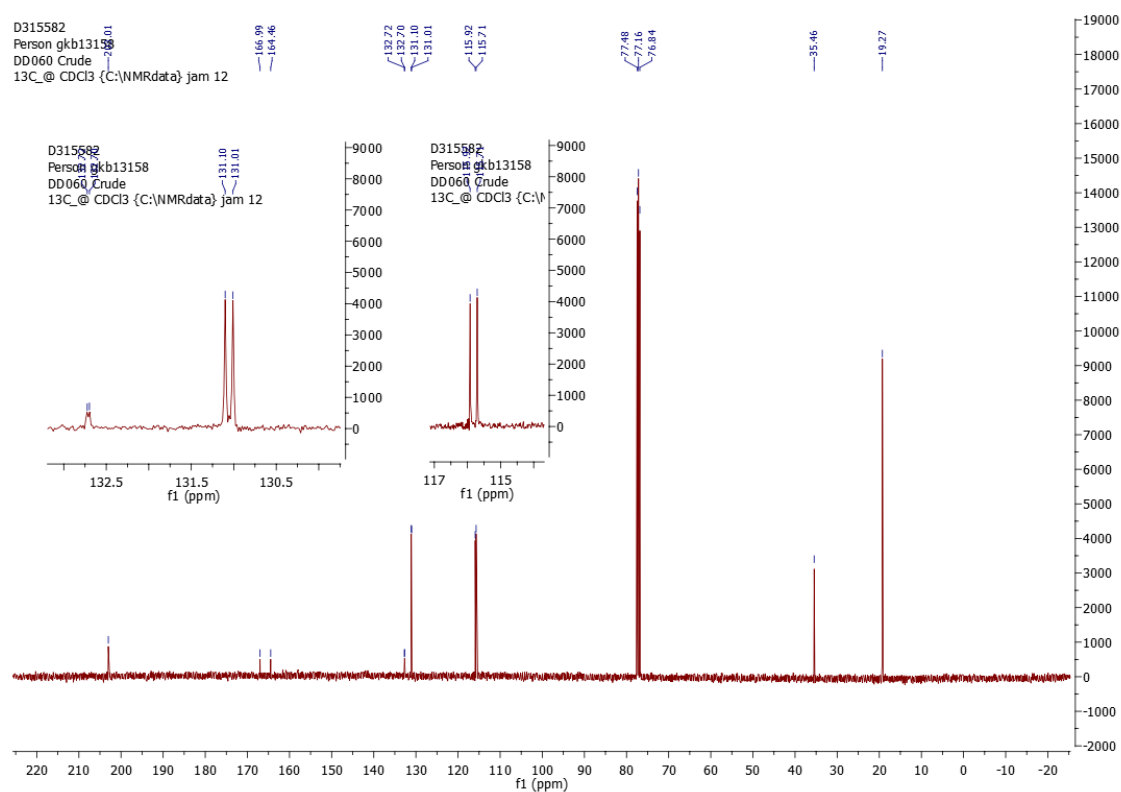

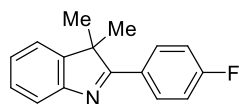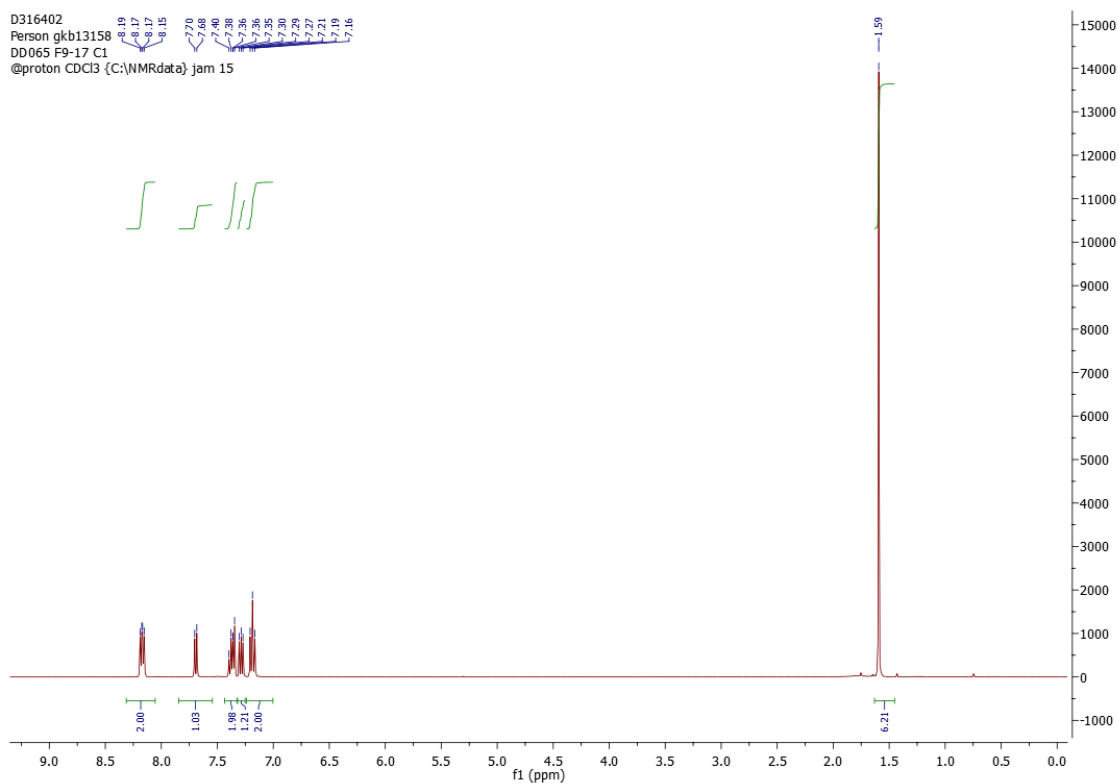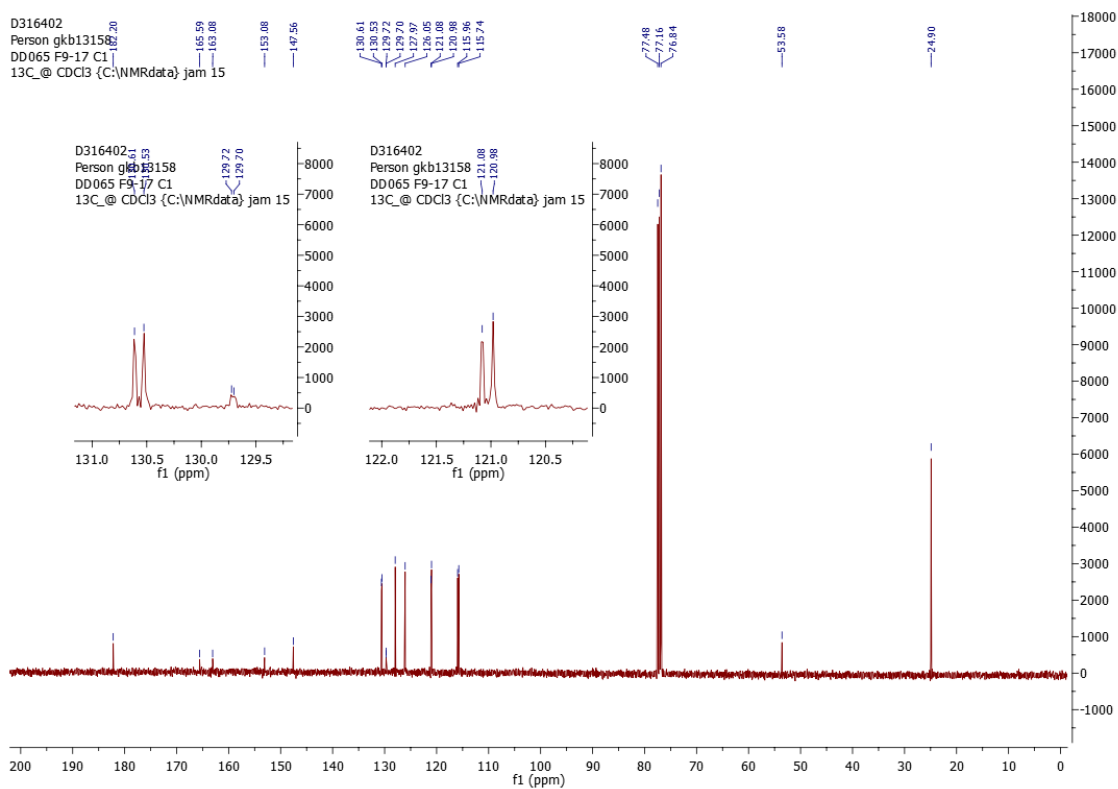



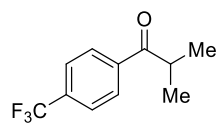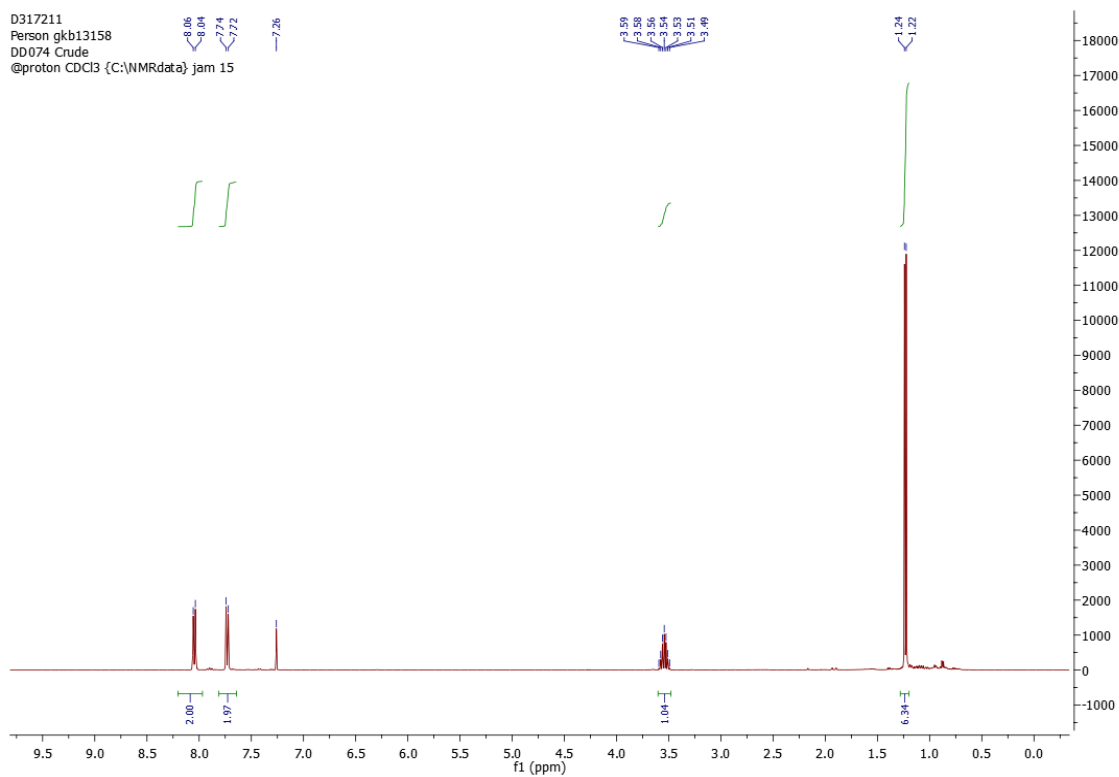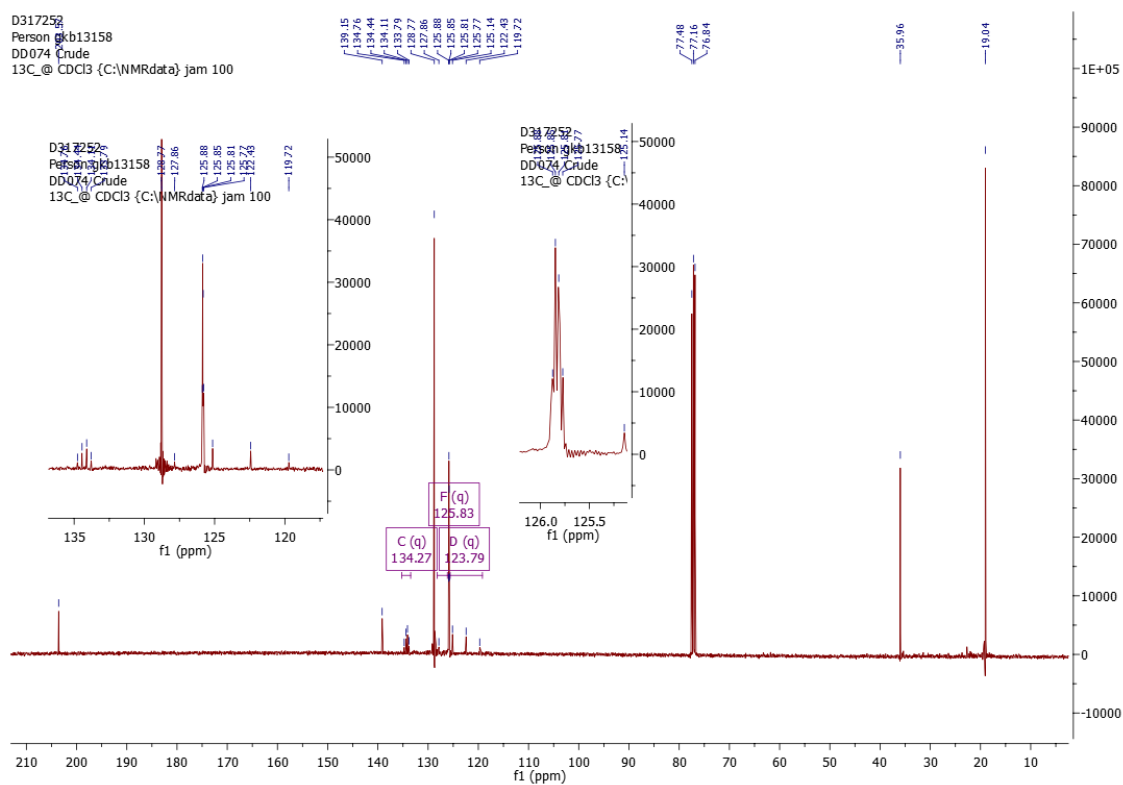

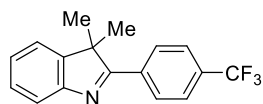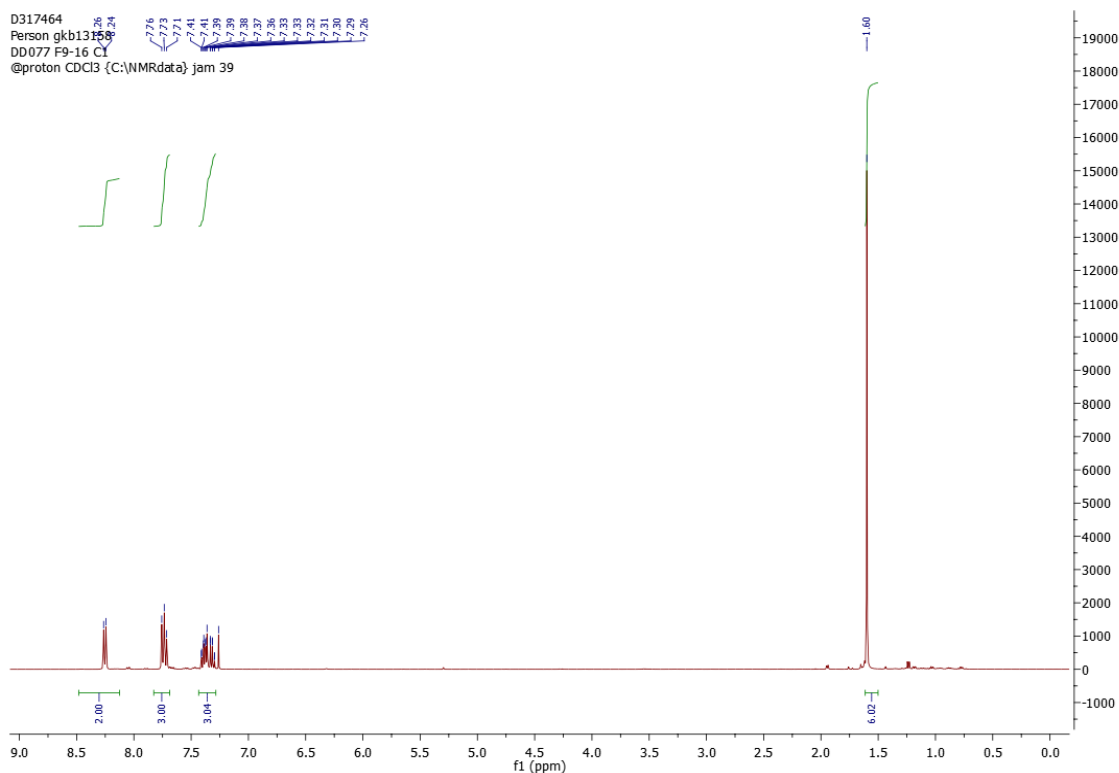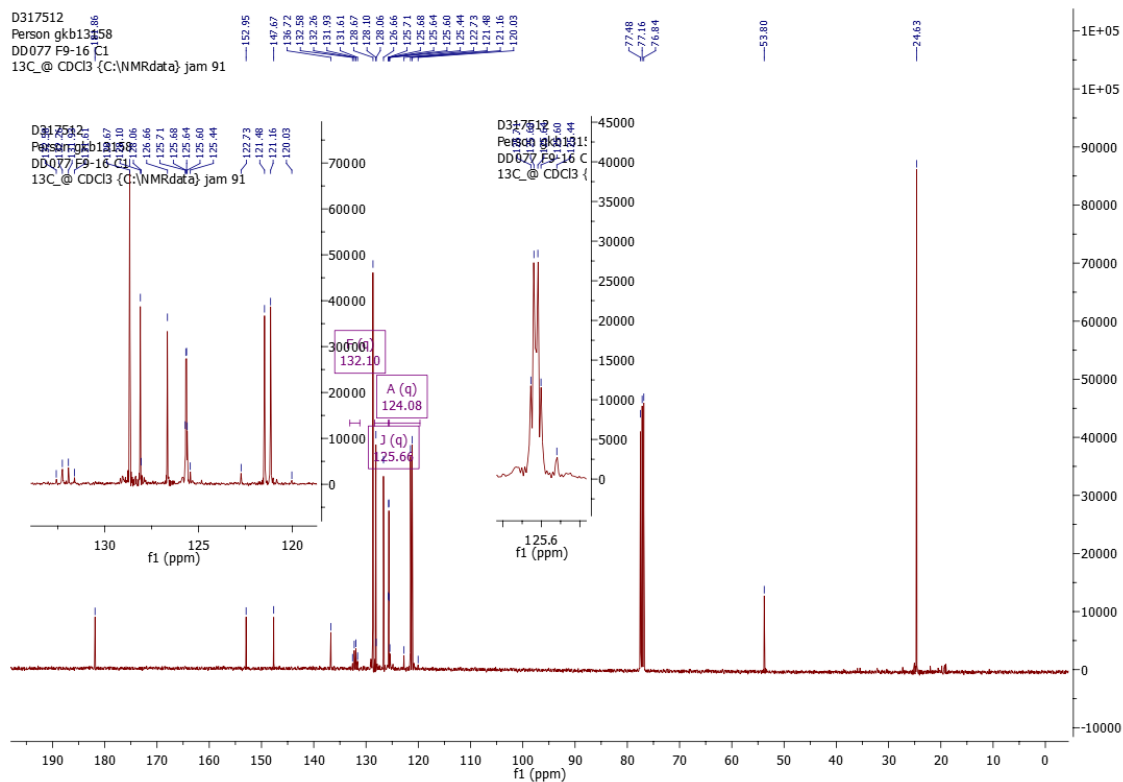

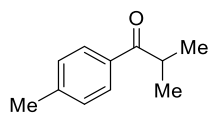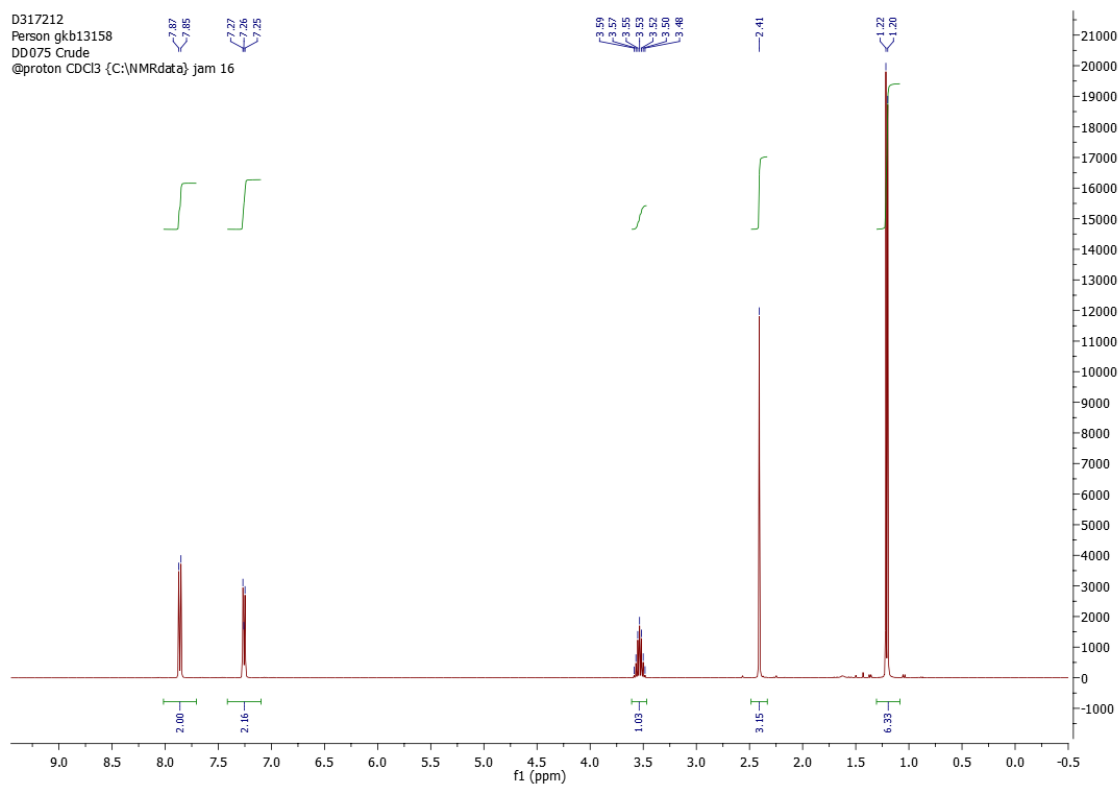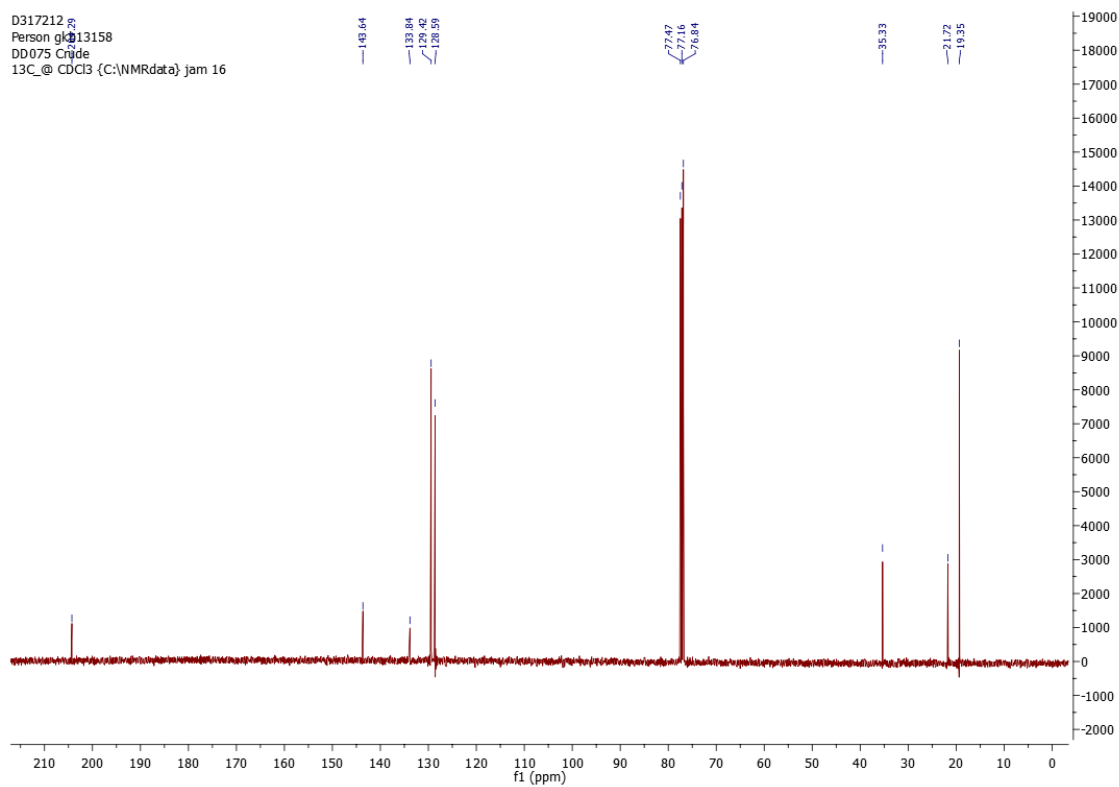

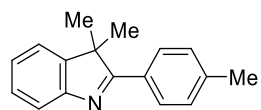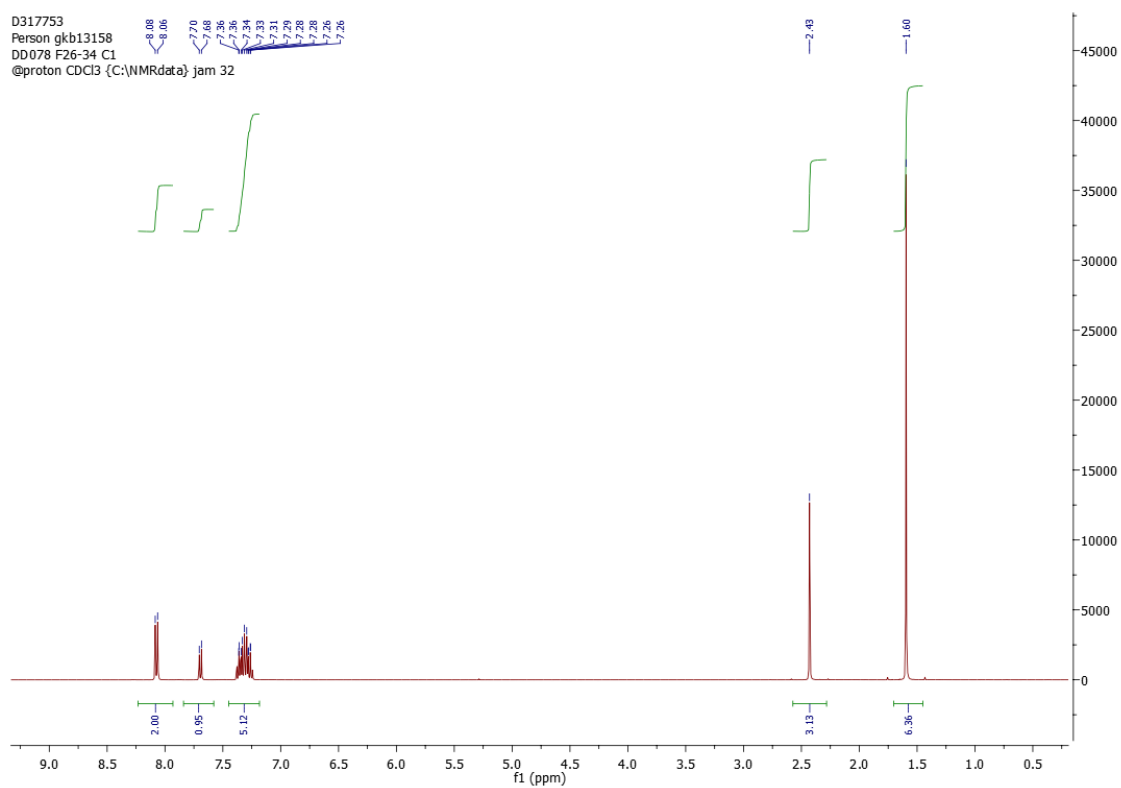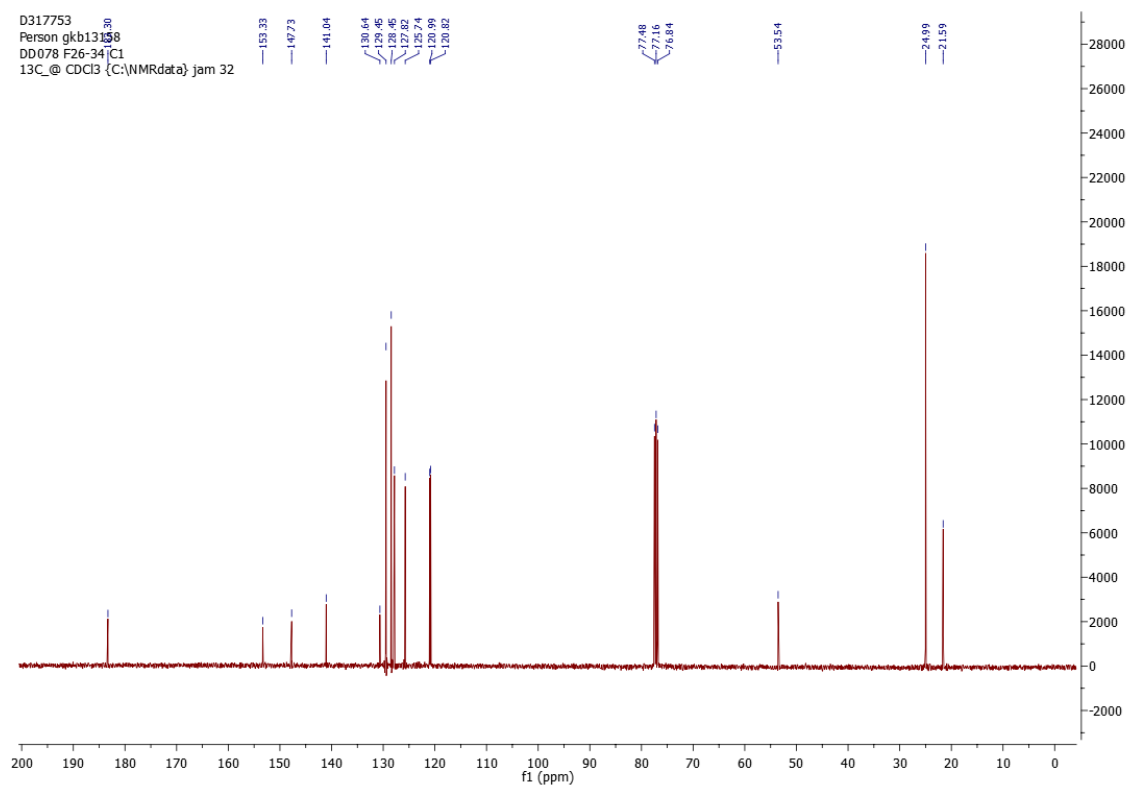

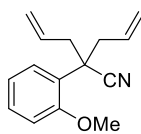

D327626  
 Person gkb13158  
 DD131 F5-7 C1  
 @proton CDCl3 {C:\NMRdata} jam 30

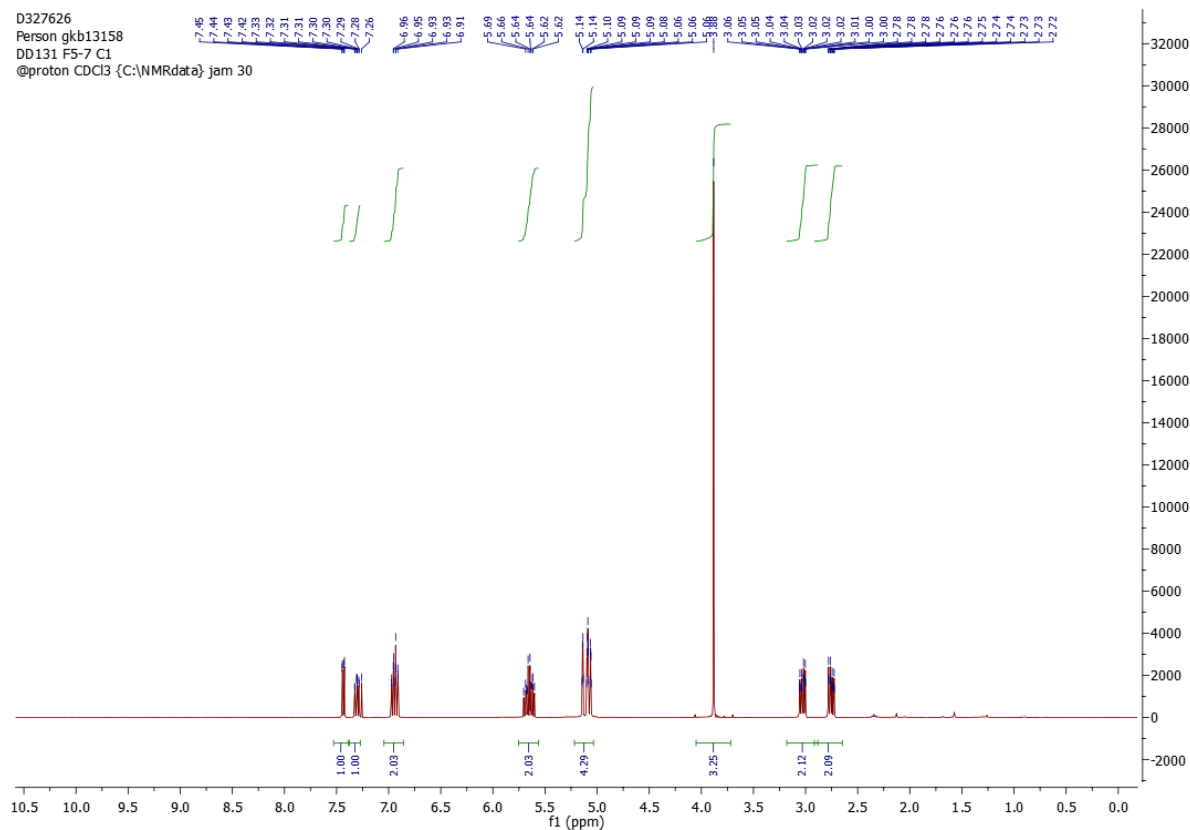

D327626  
 Person gkb13158  
 DD131 F5-7 C1  
 13C\_@ CDCl3 {C:\NMRdata} jam 30

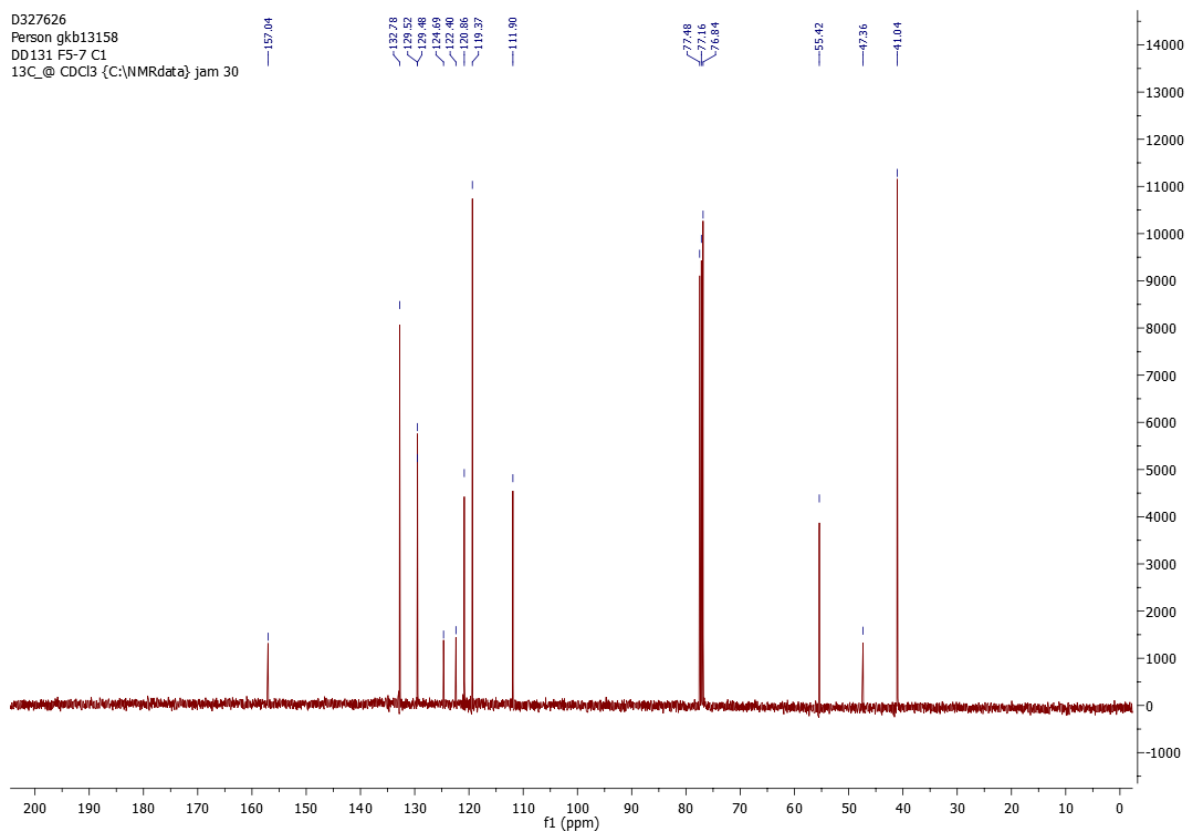

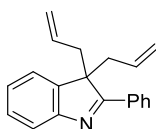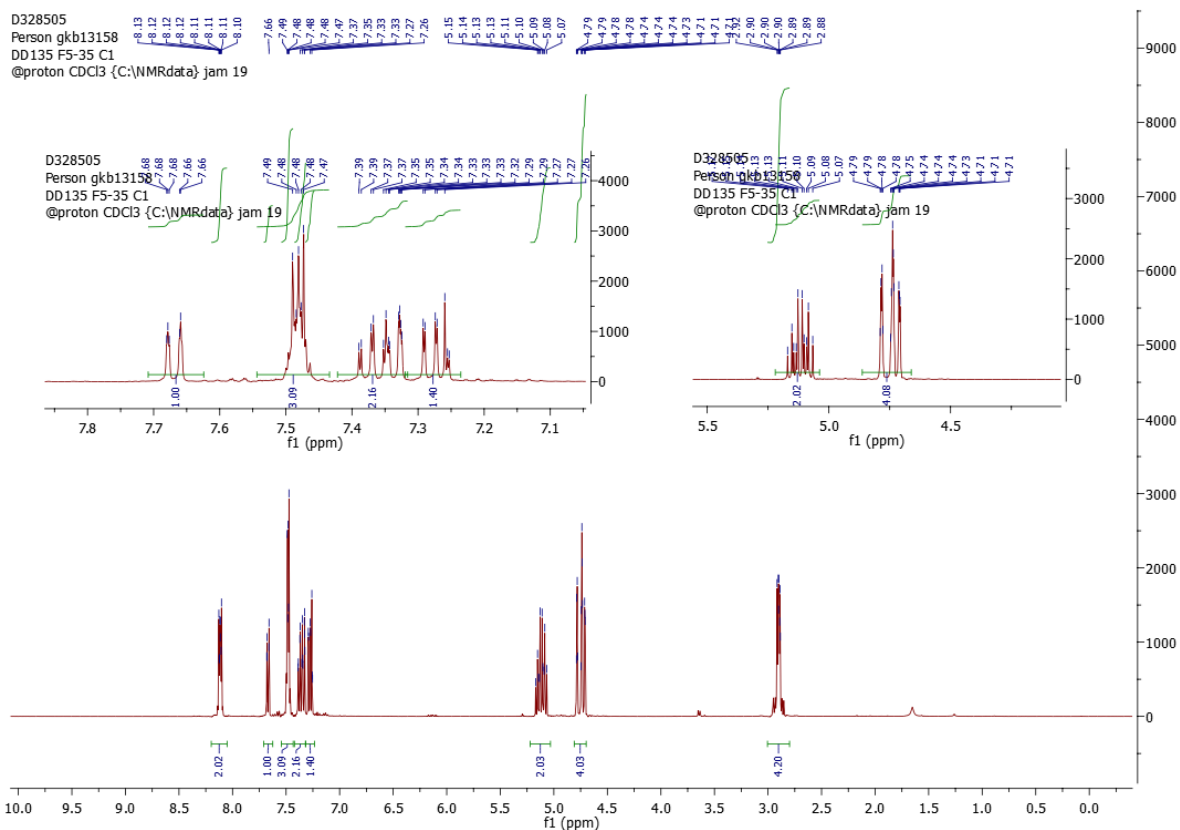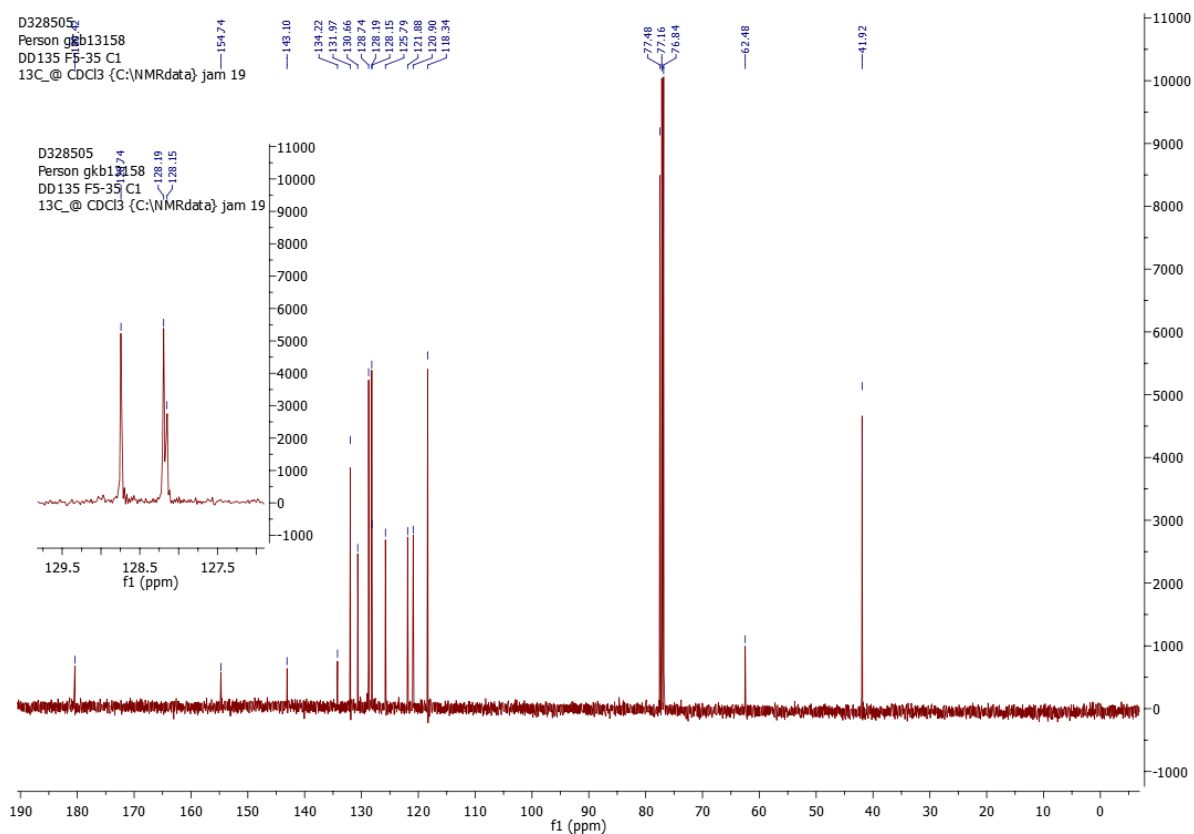

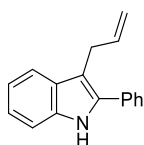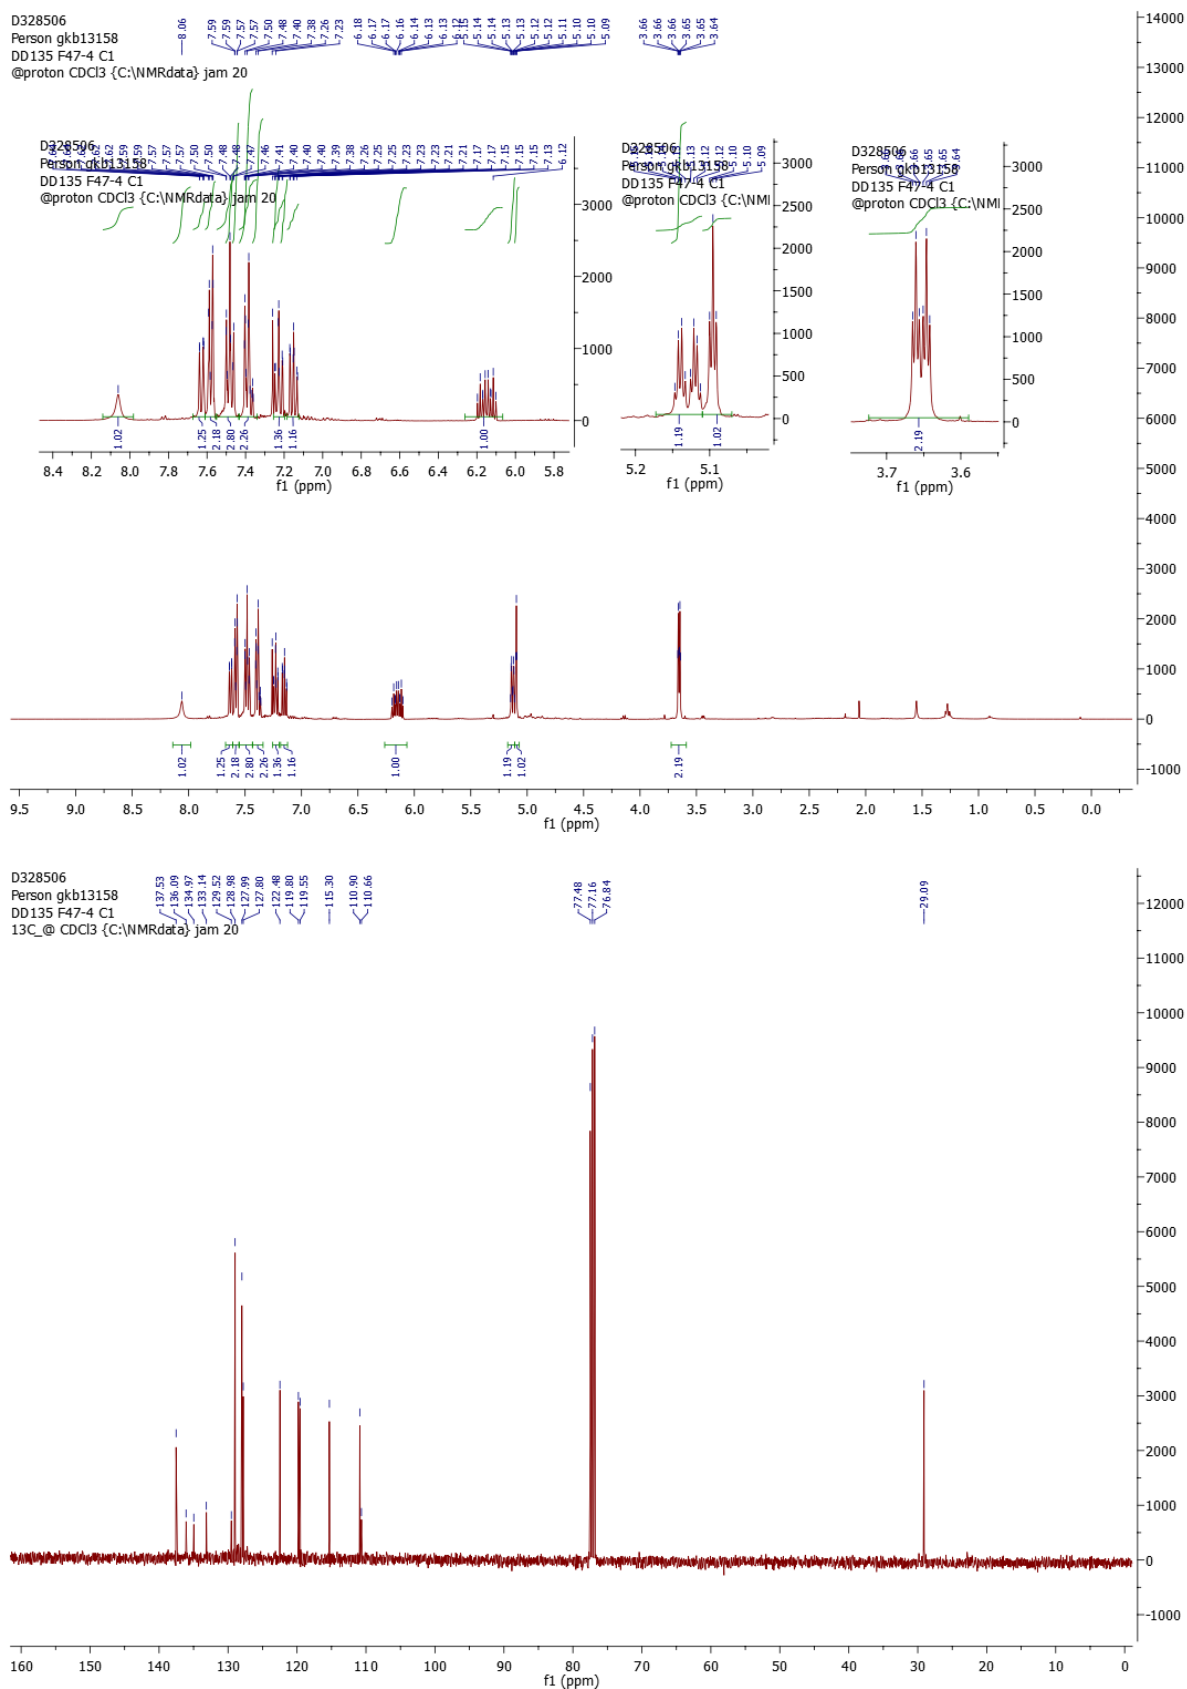

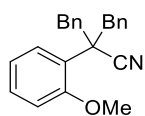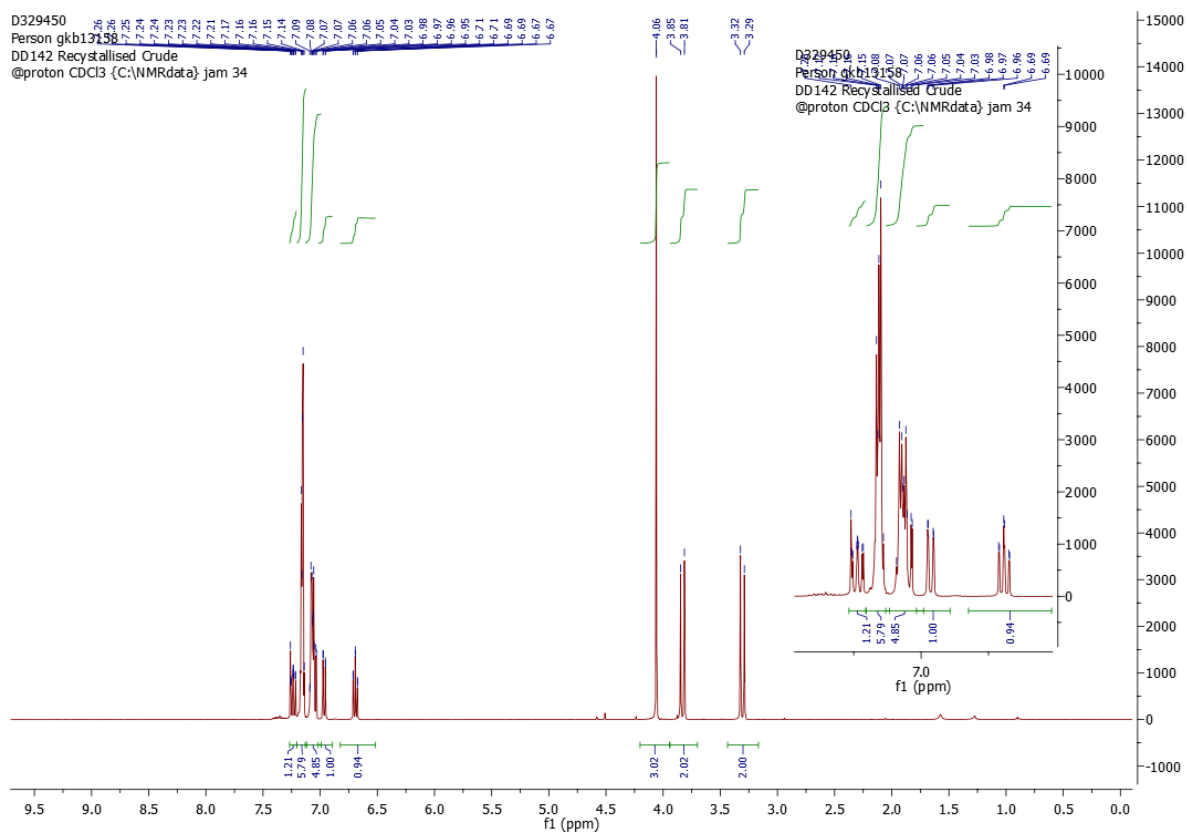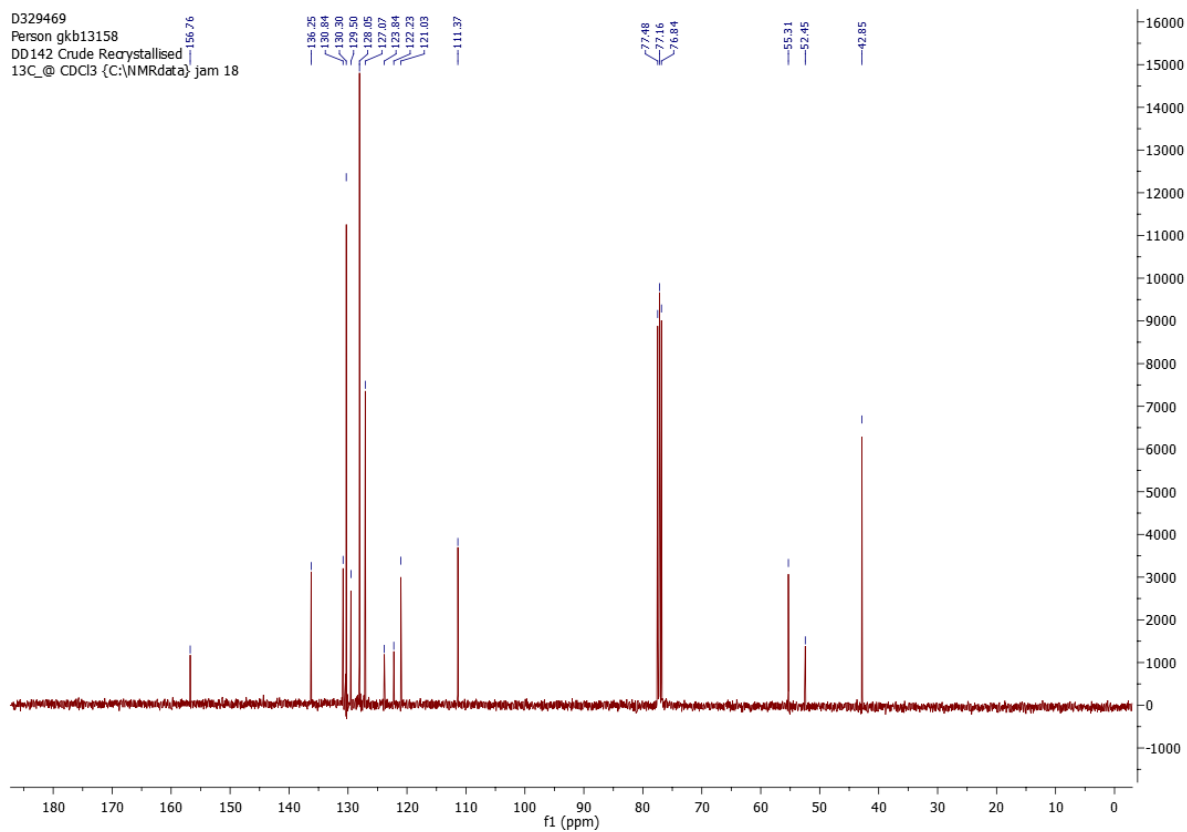



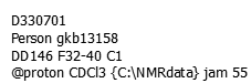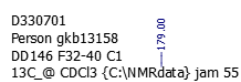

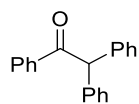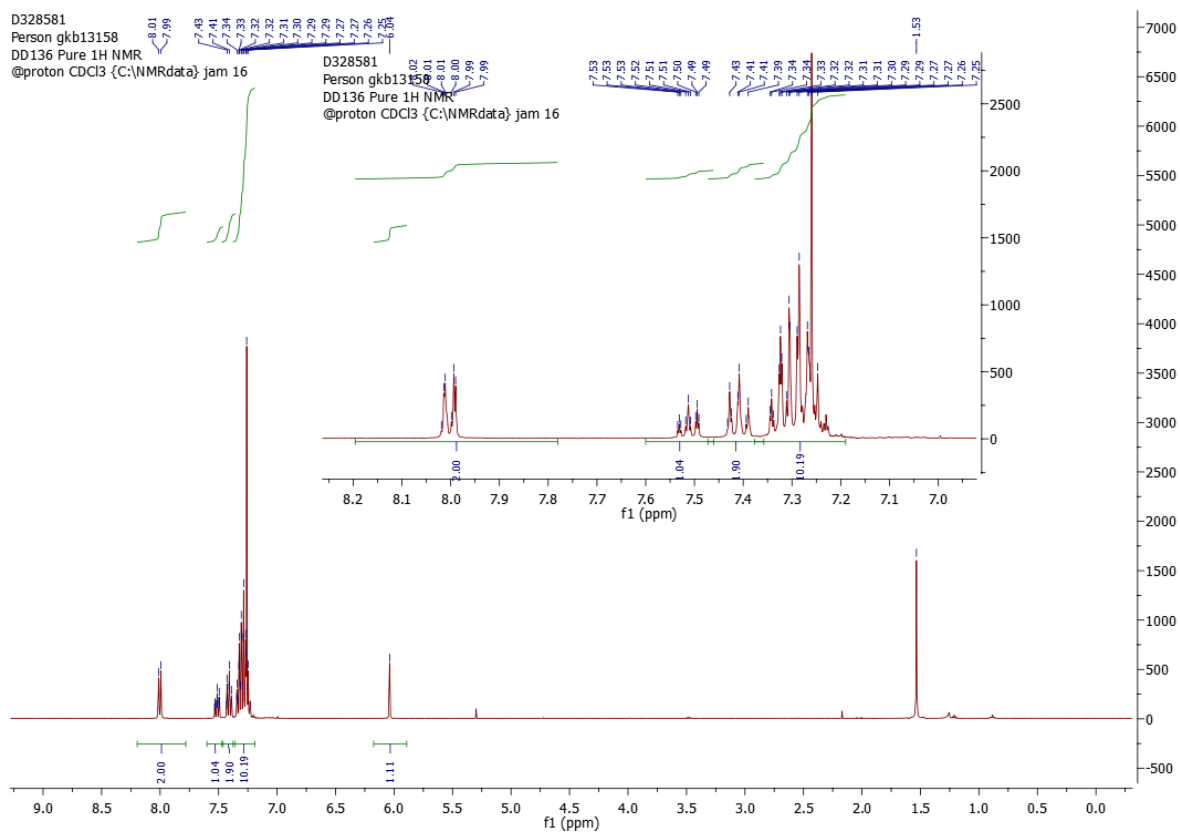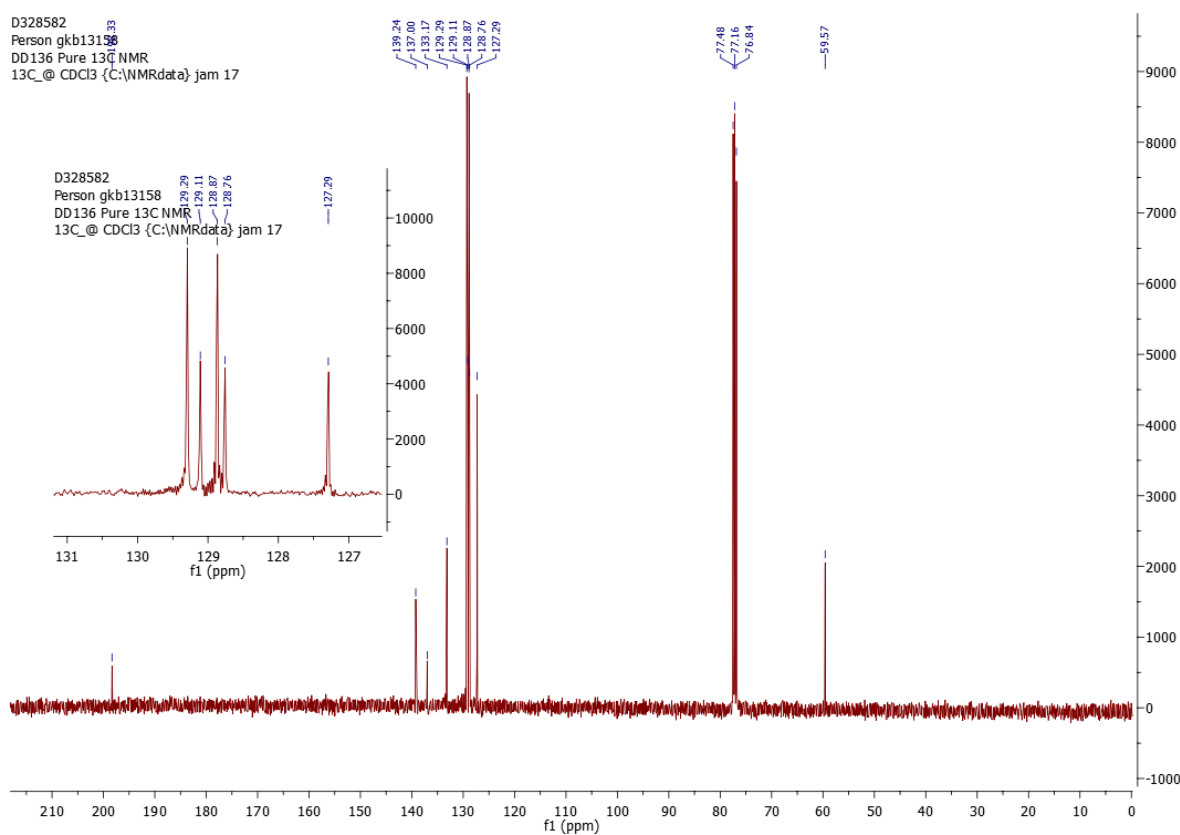

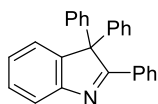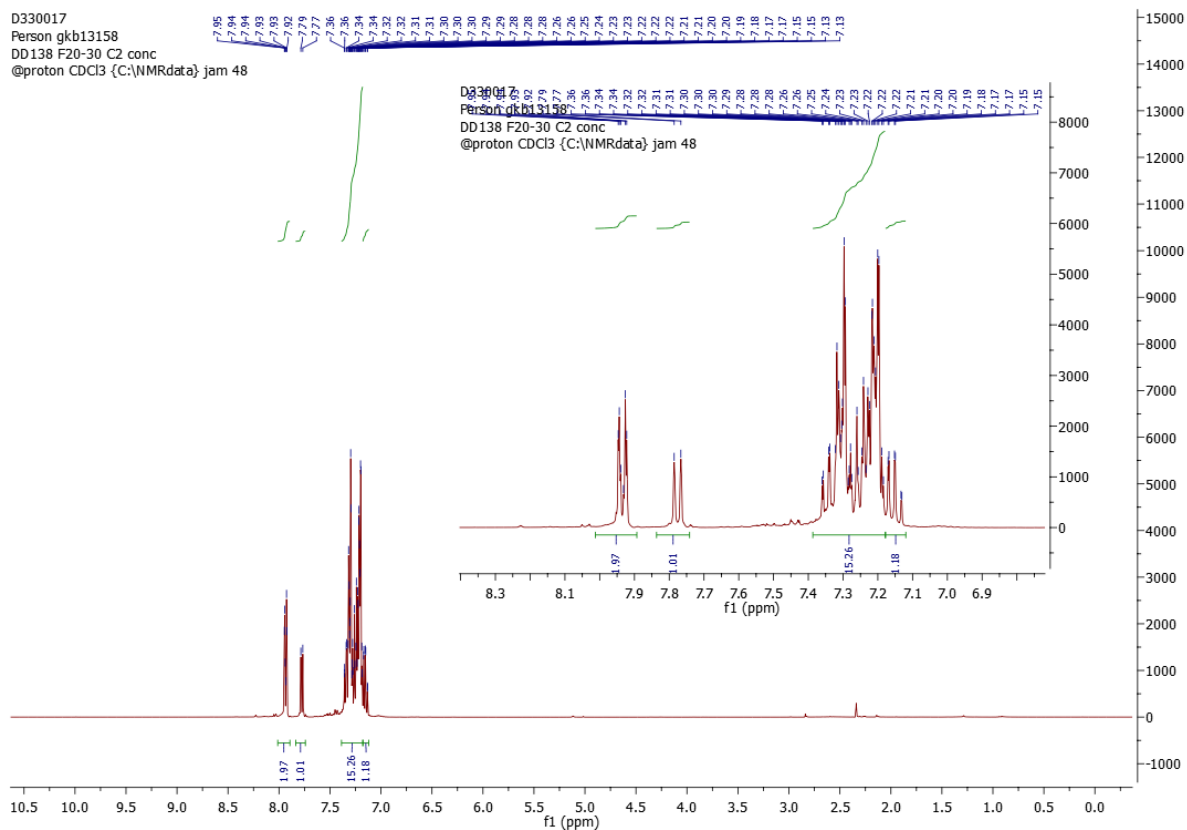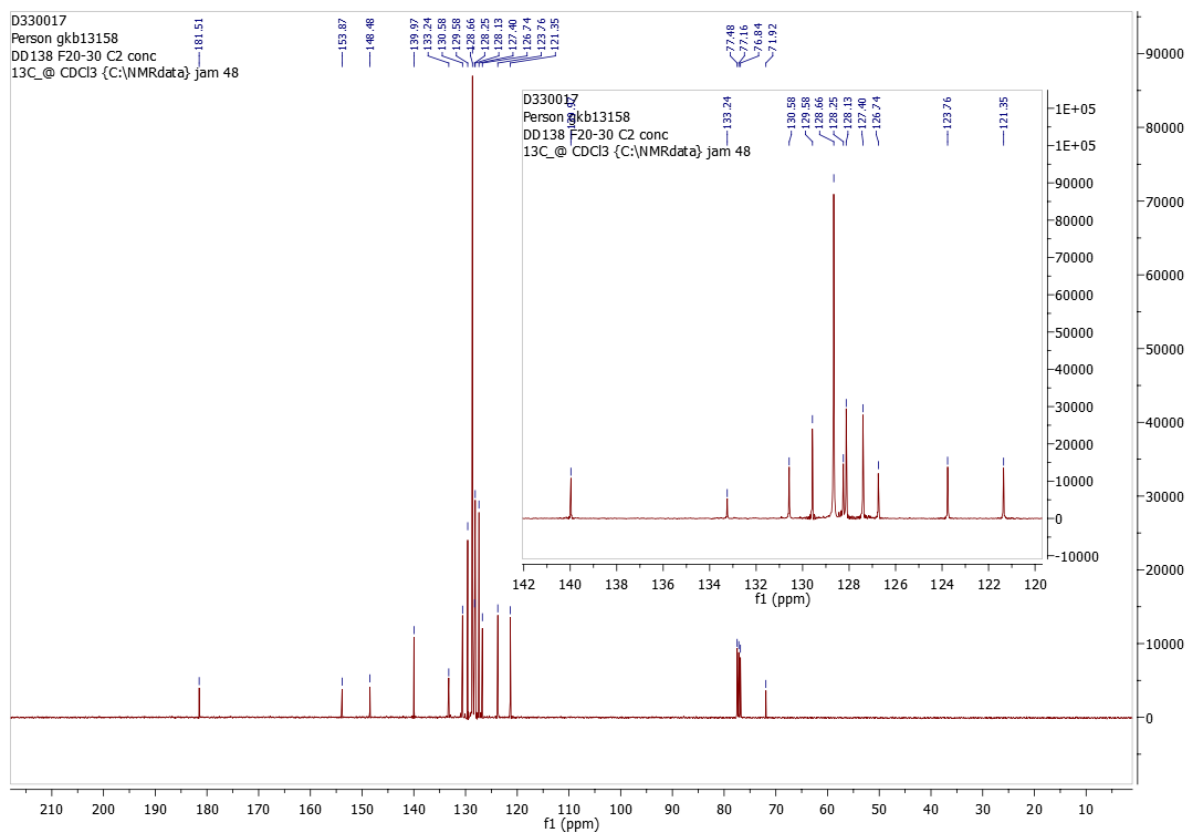

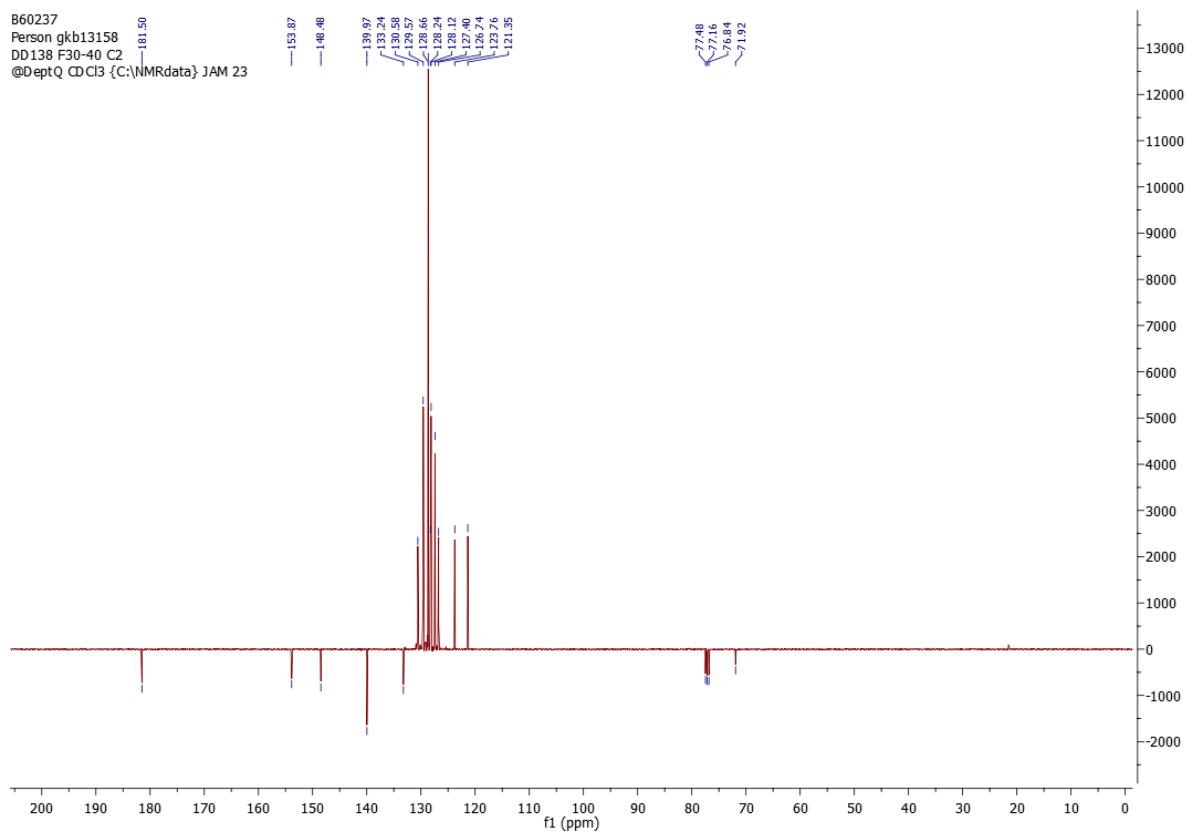

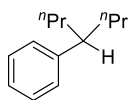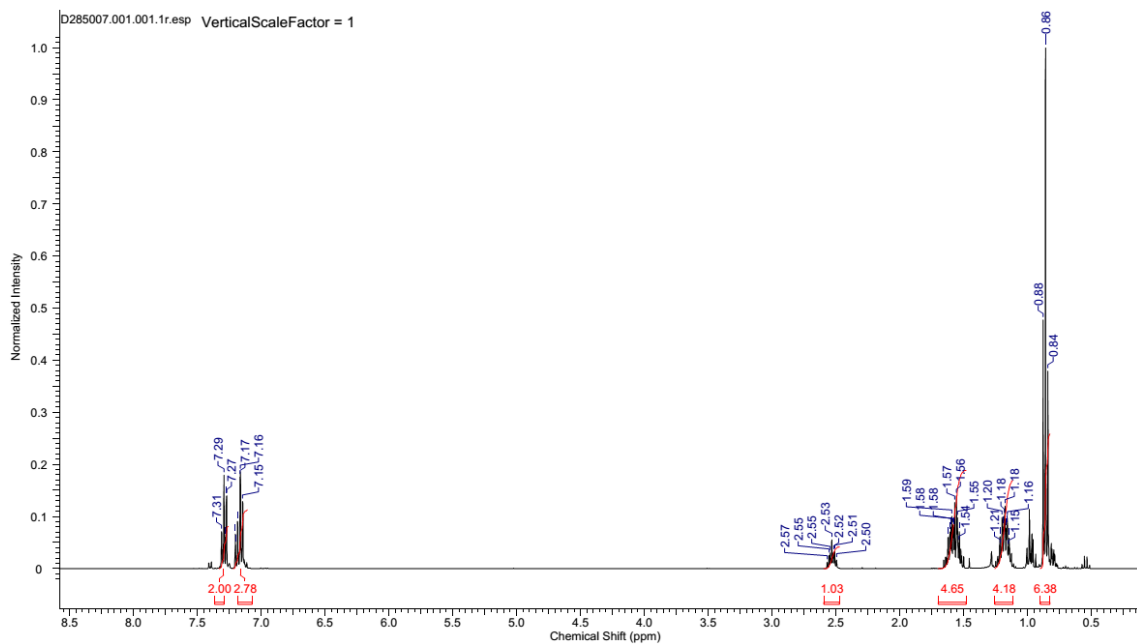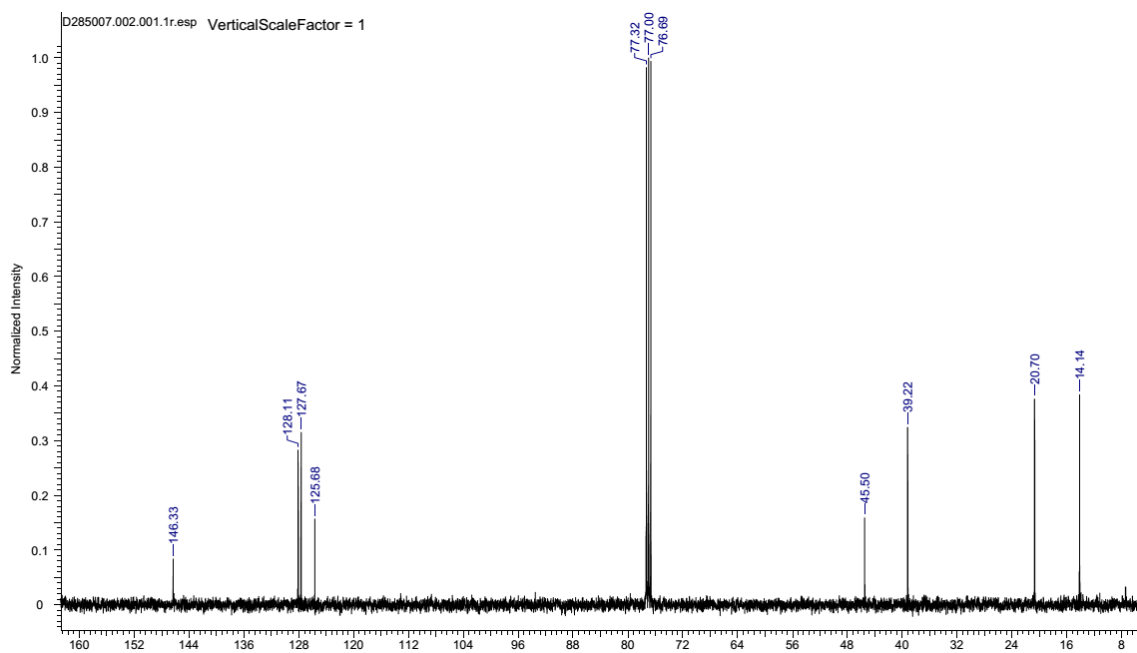

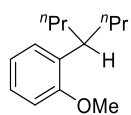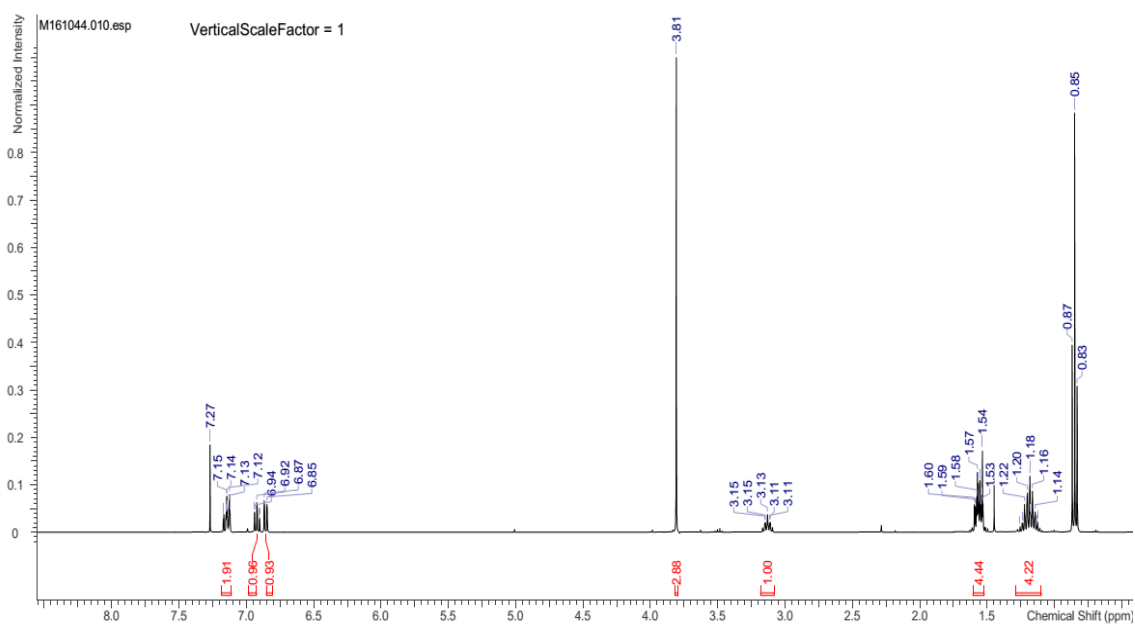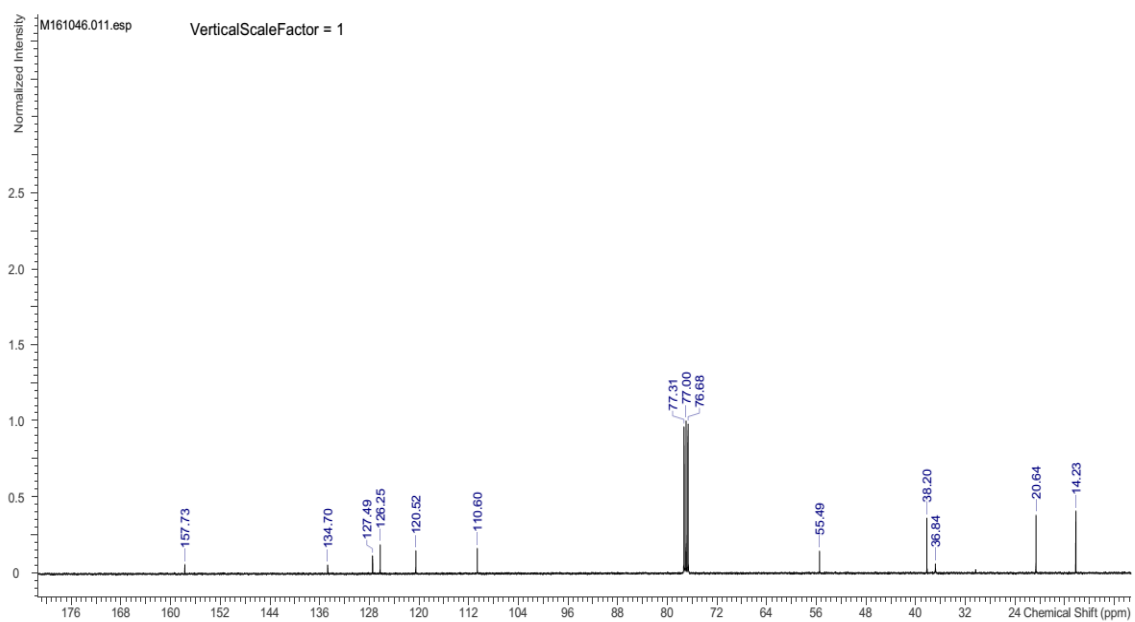

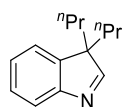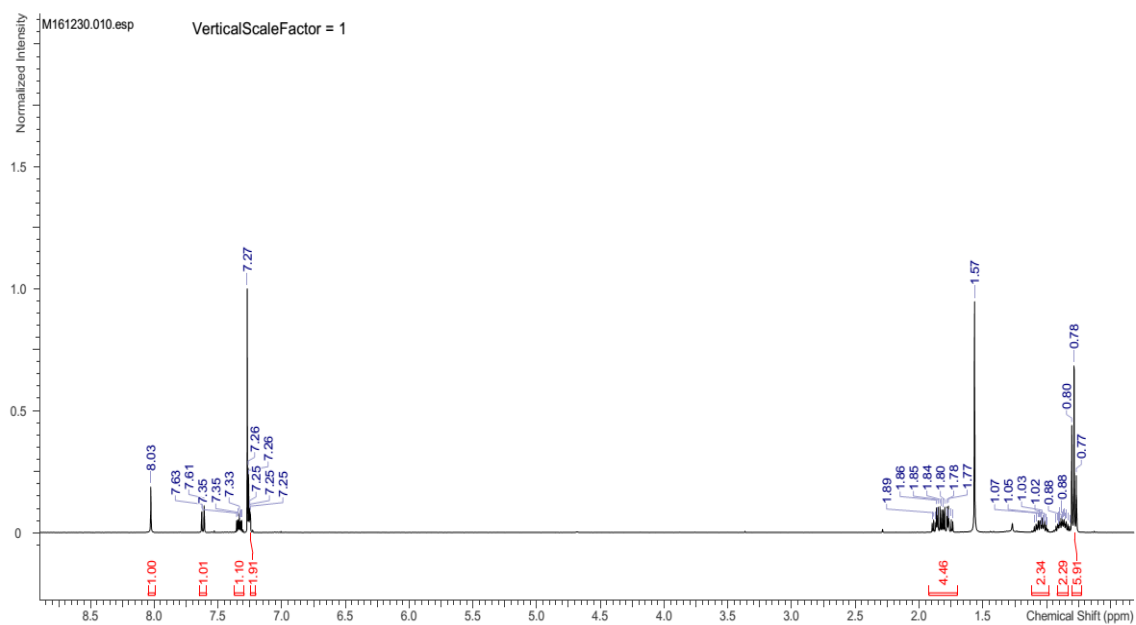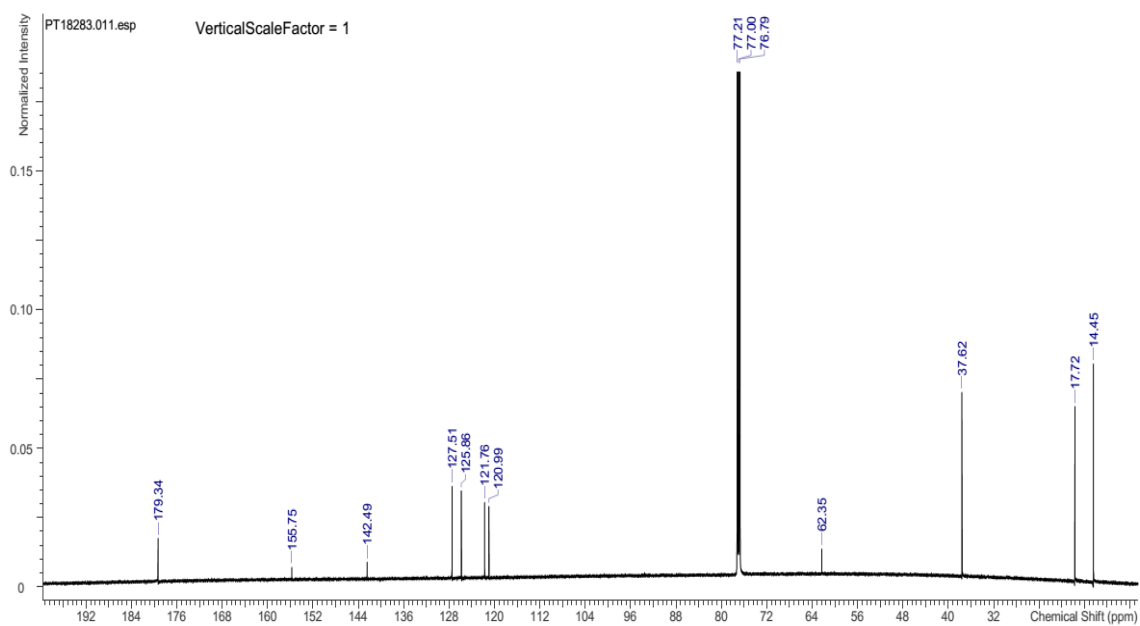

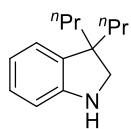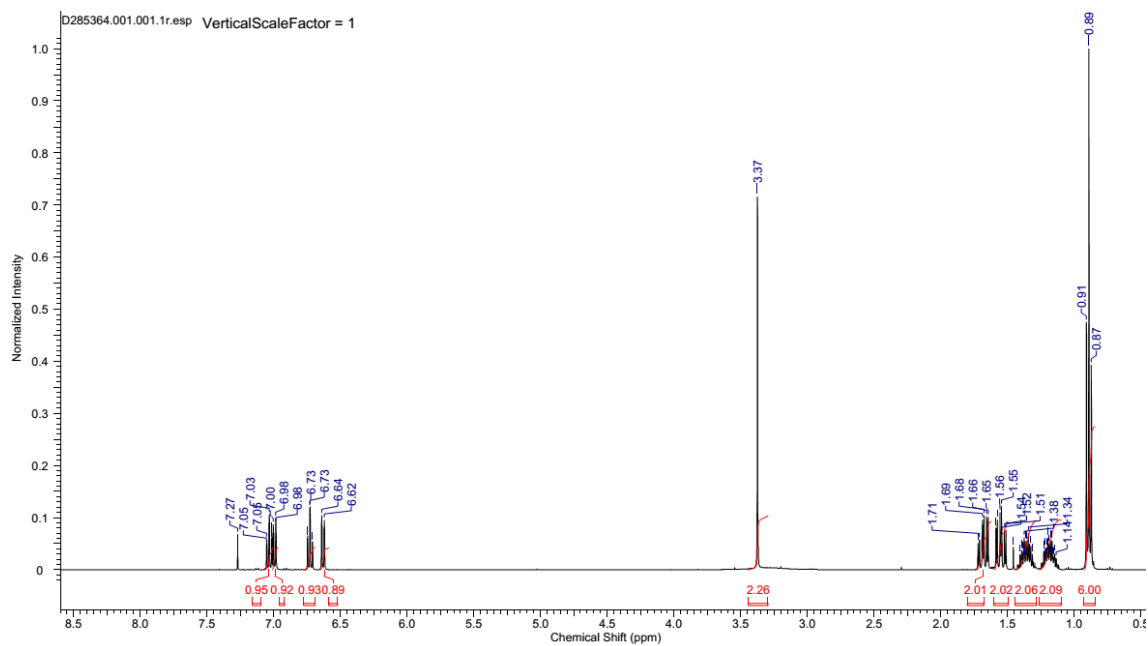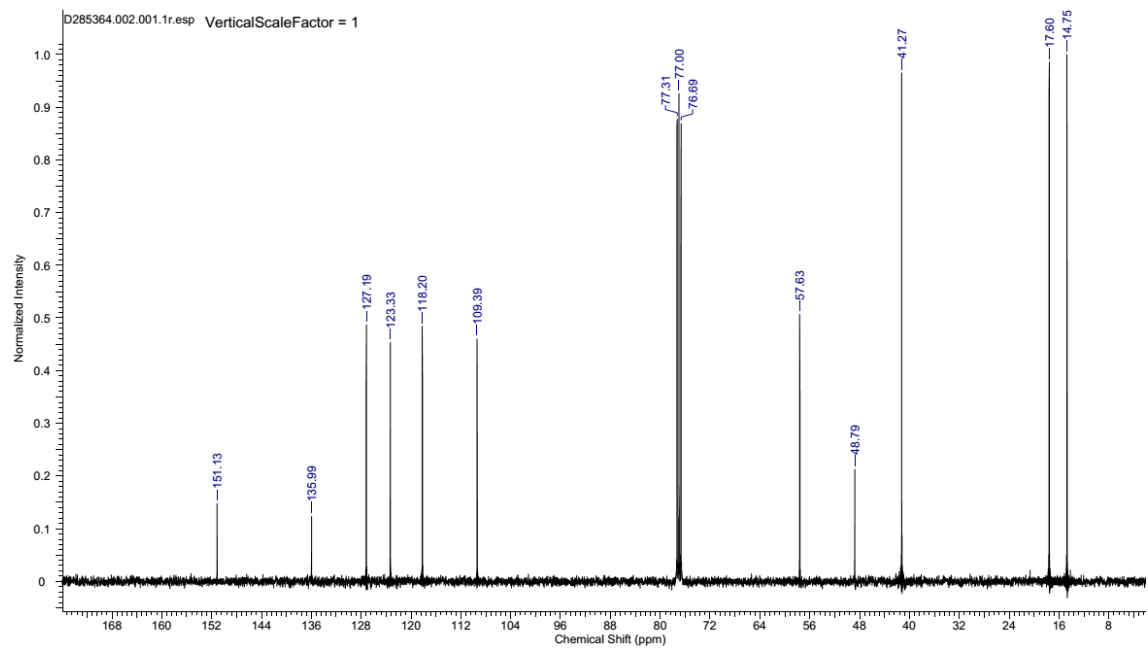



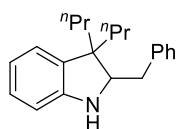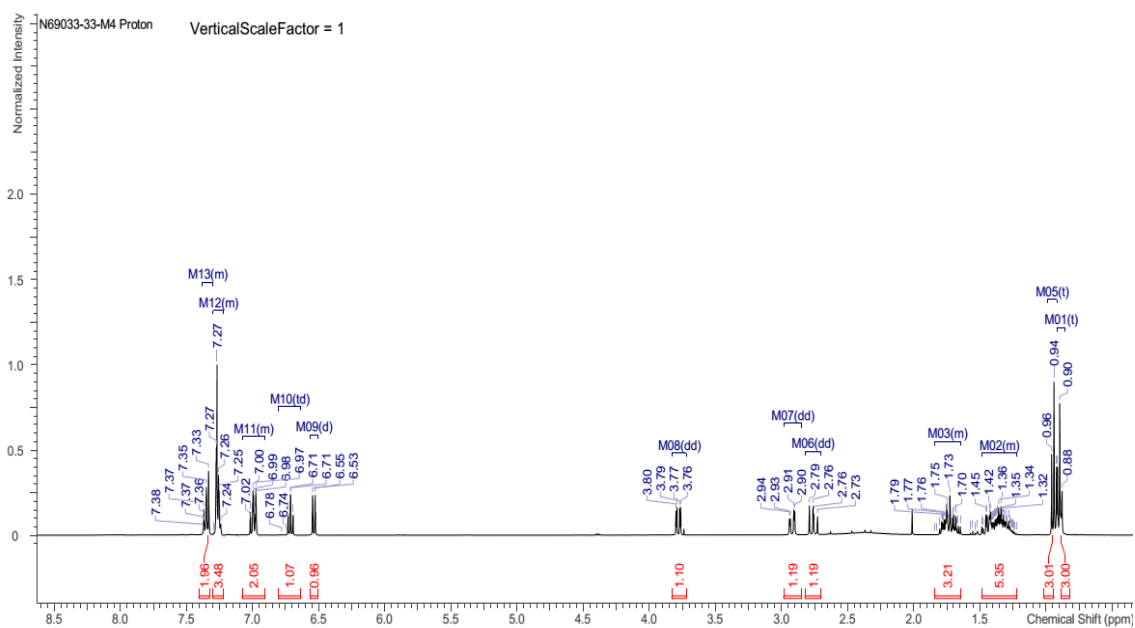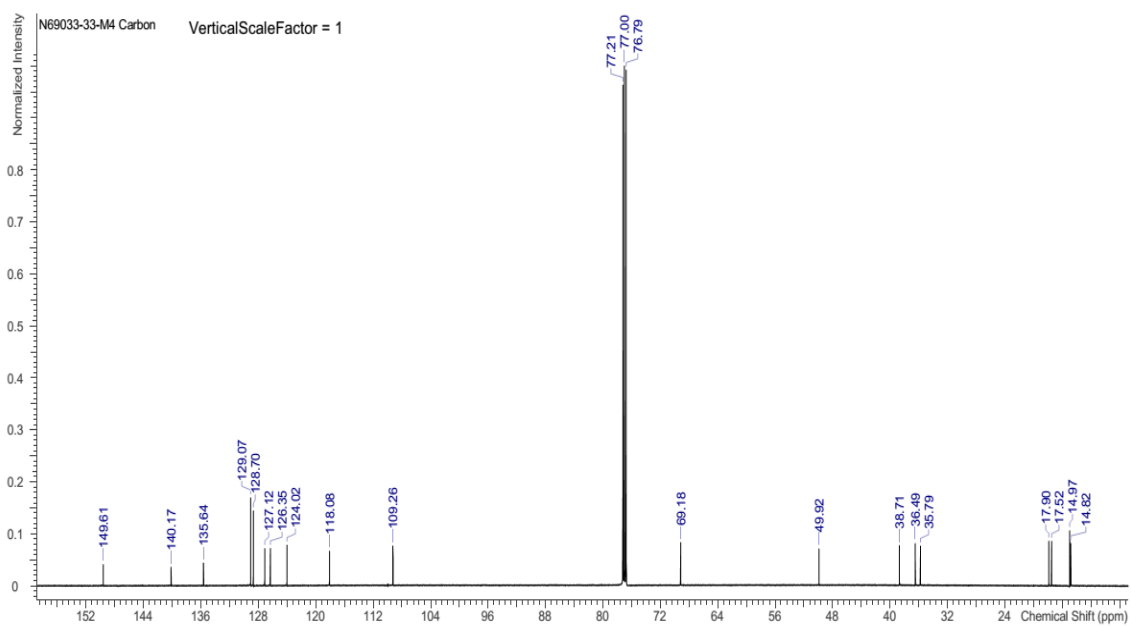

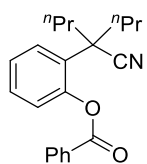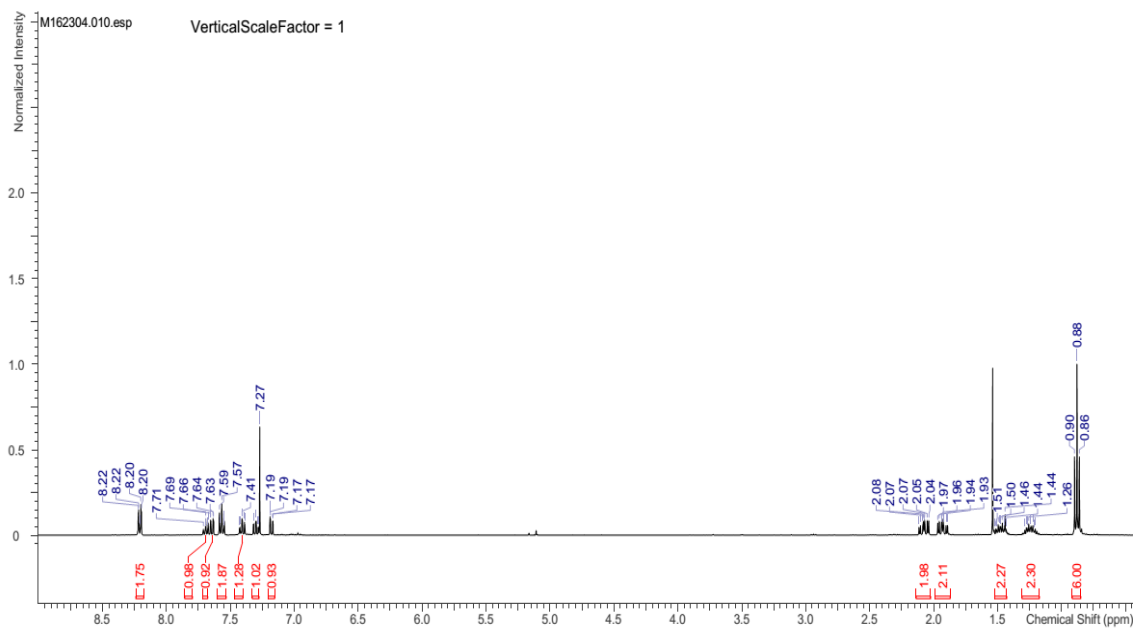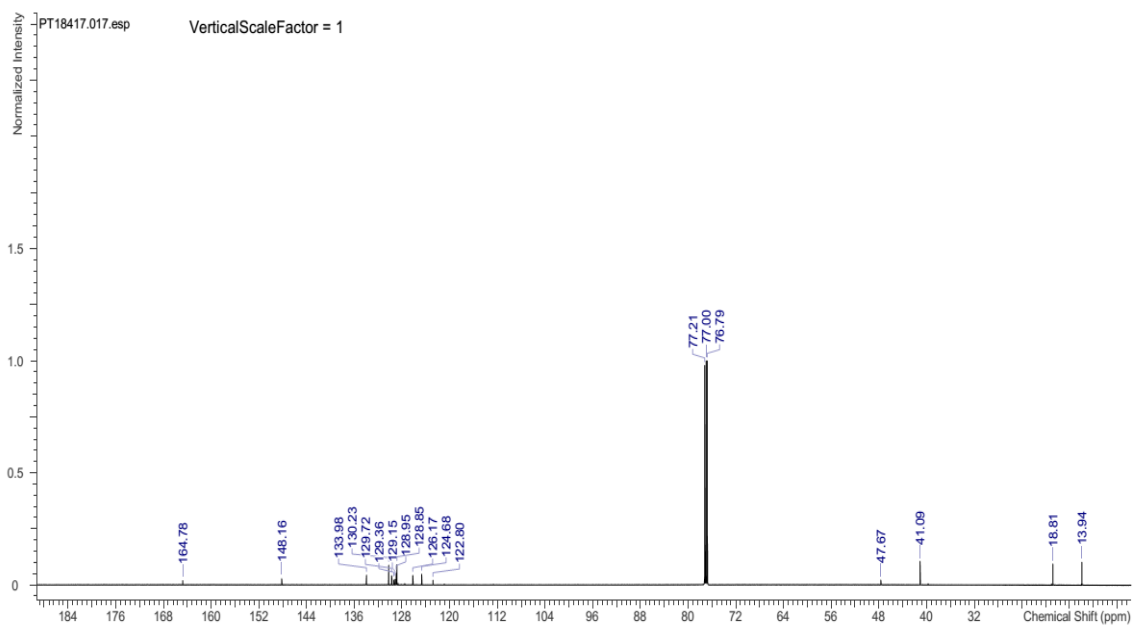

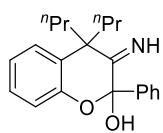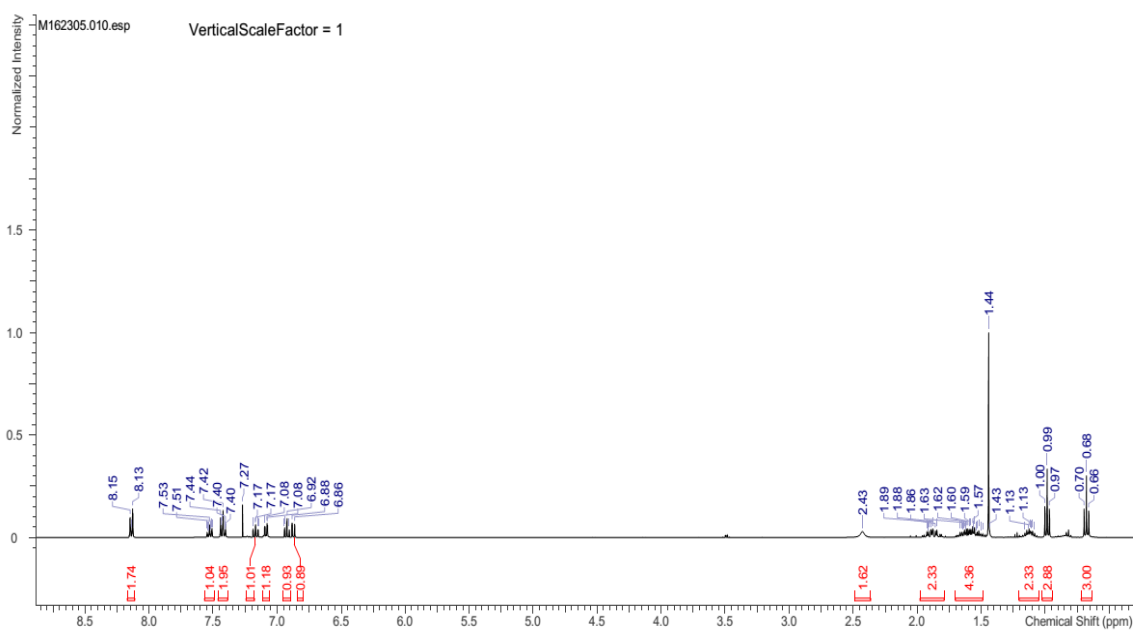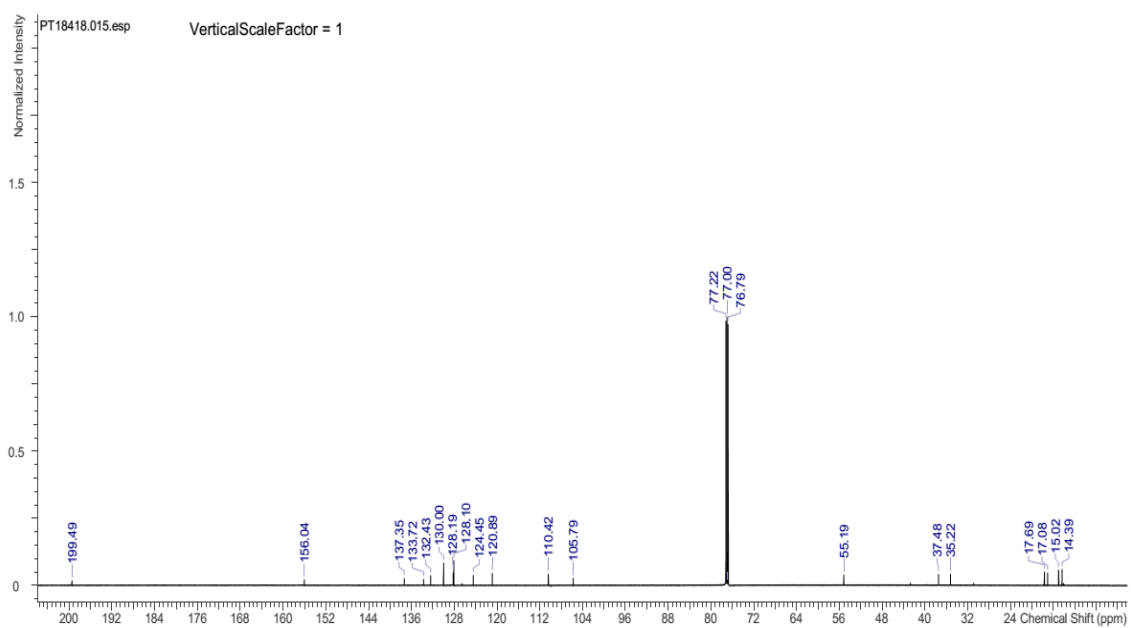

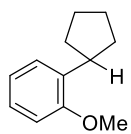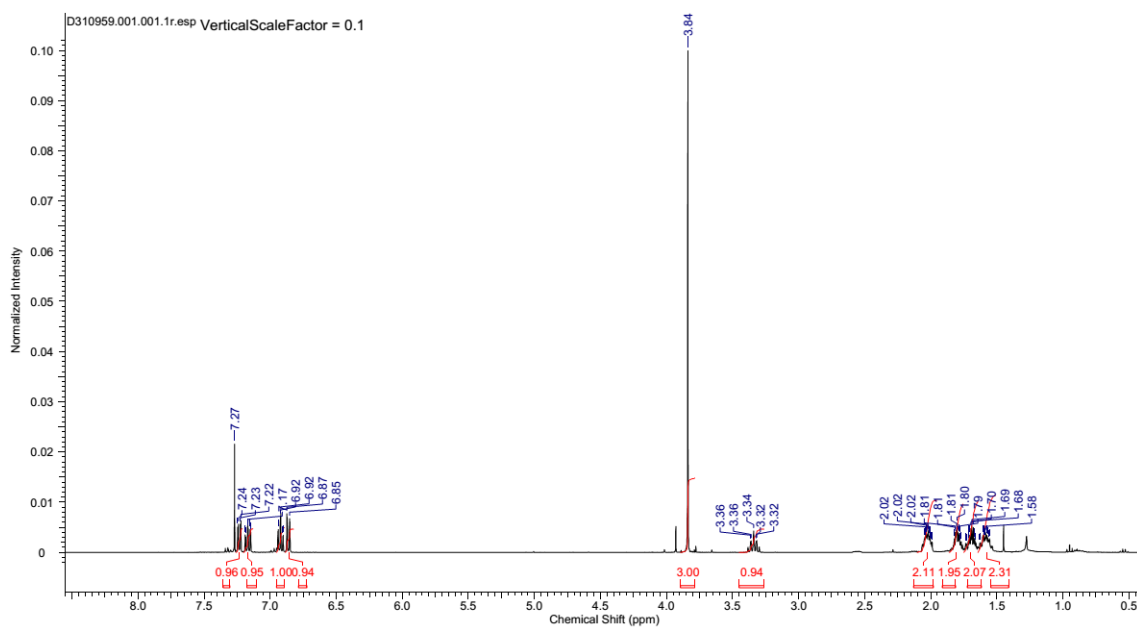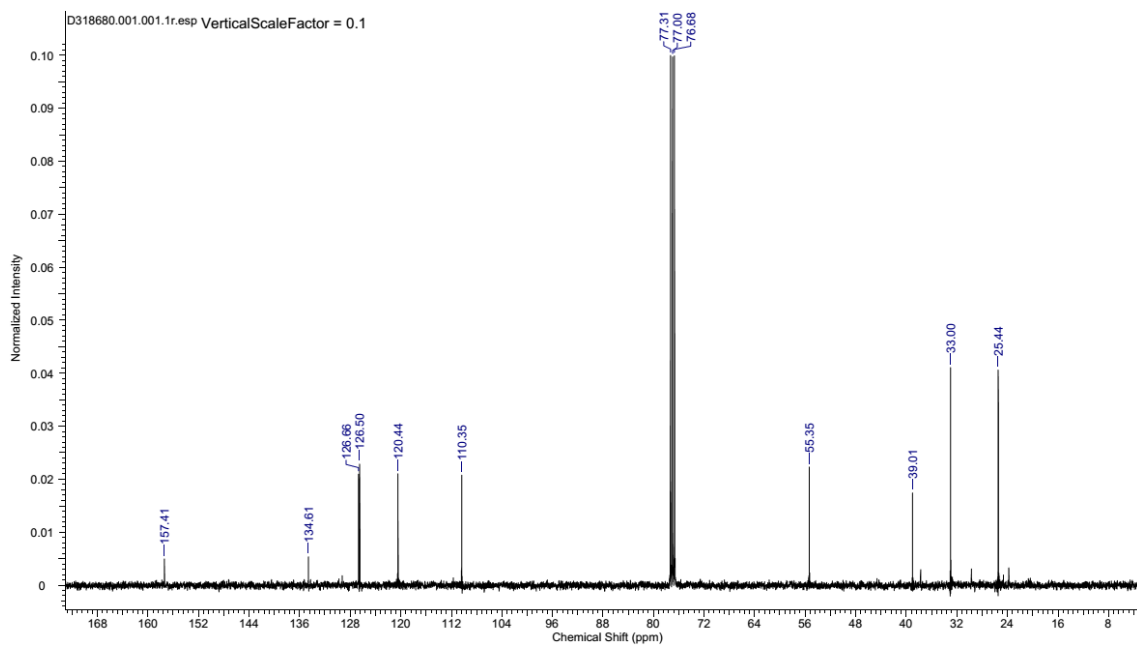

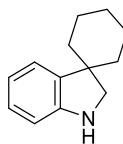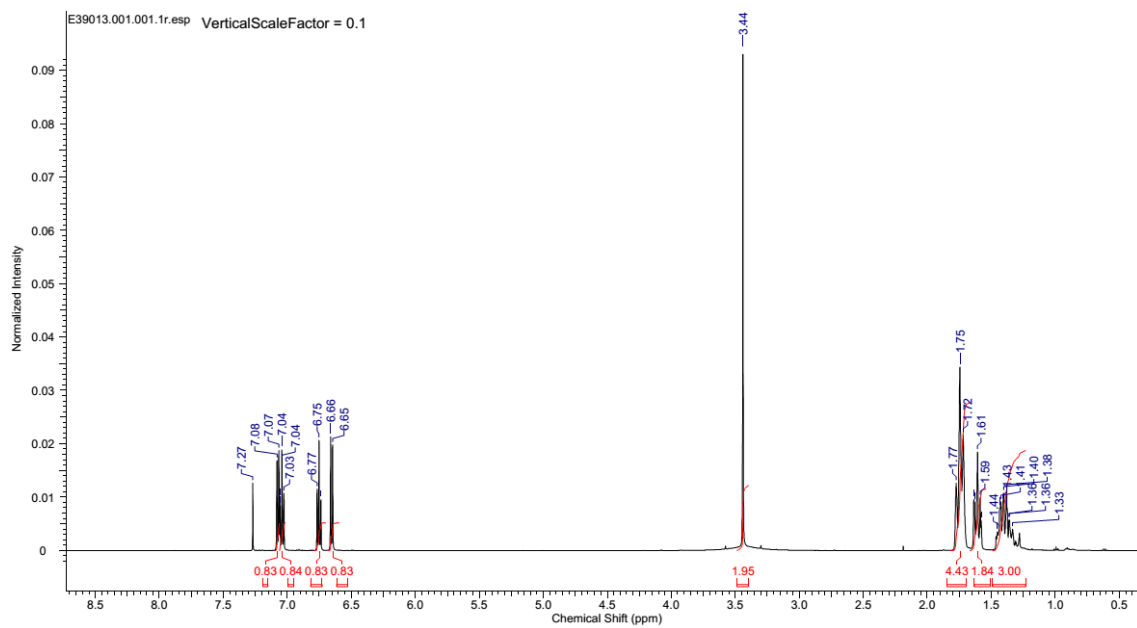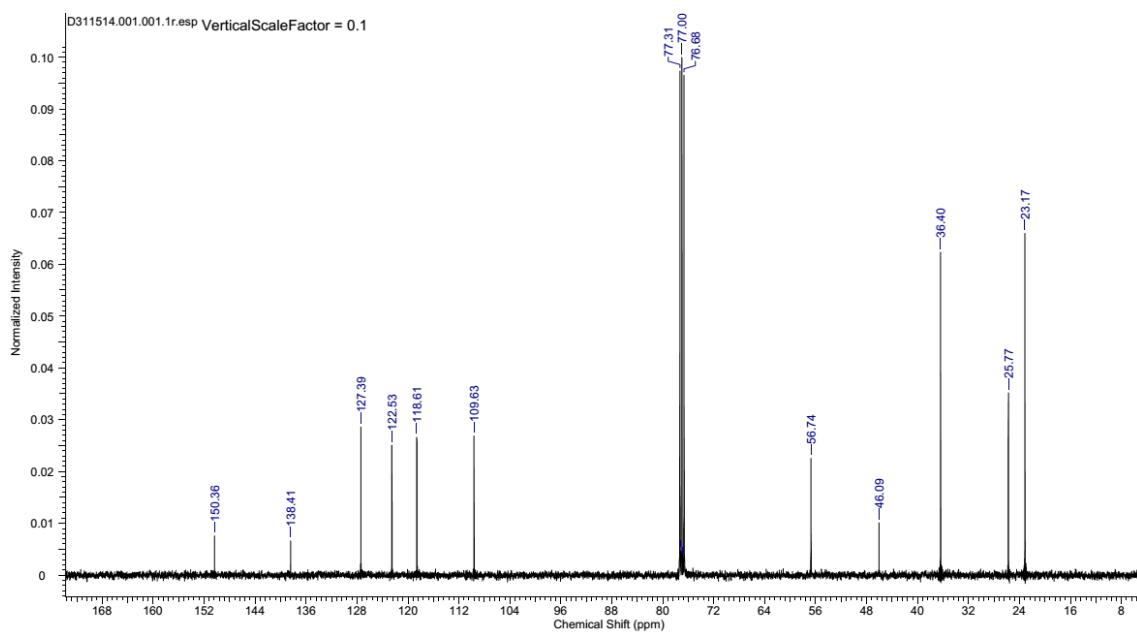

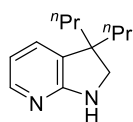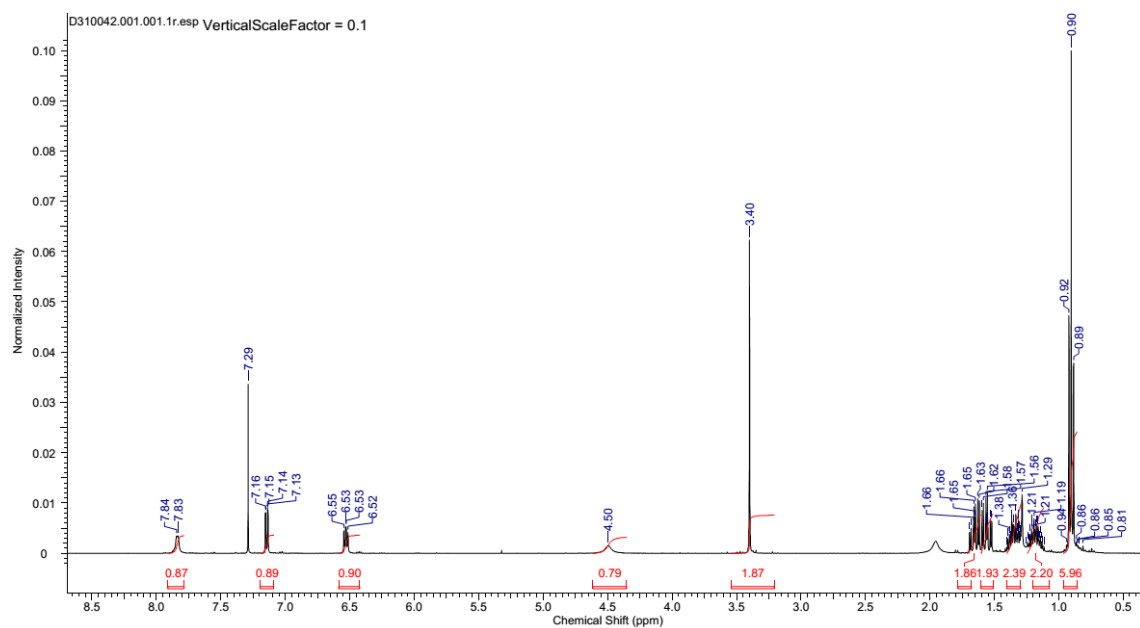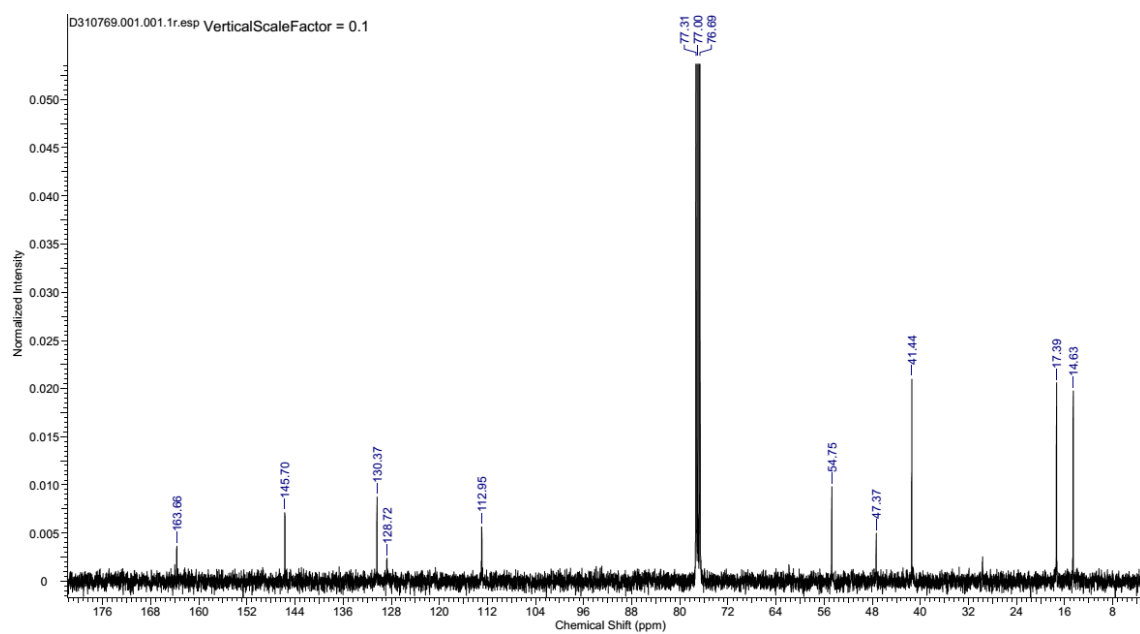

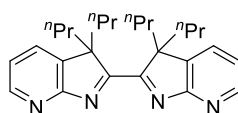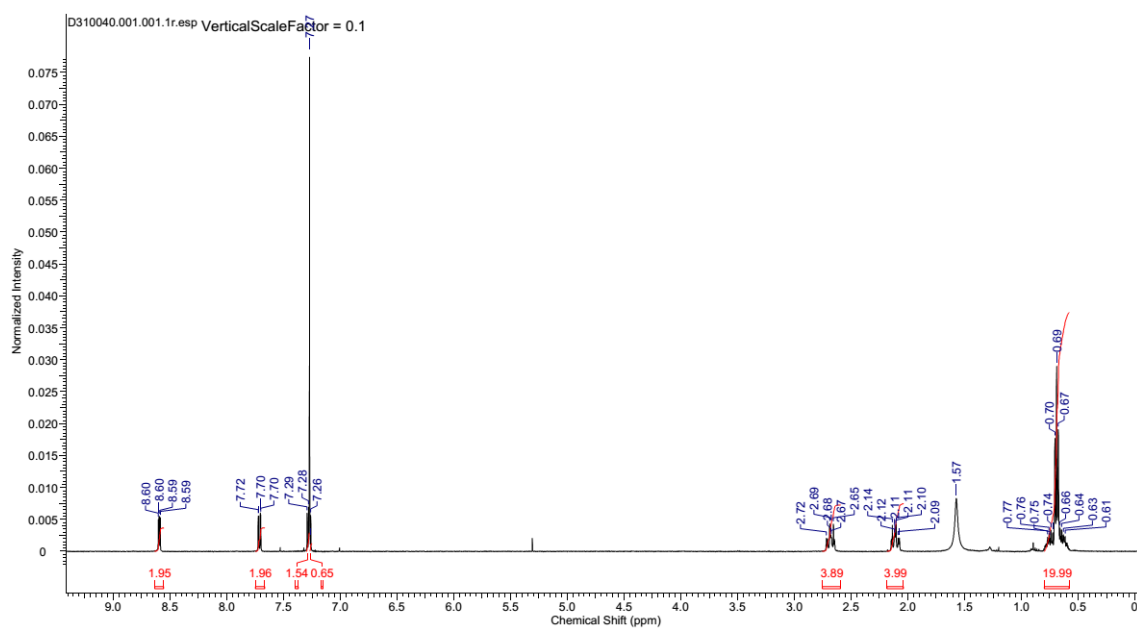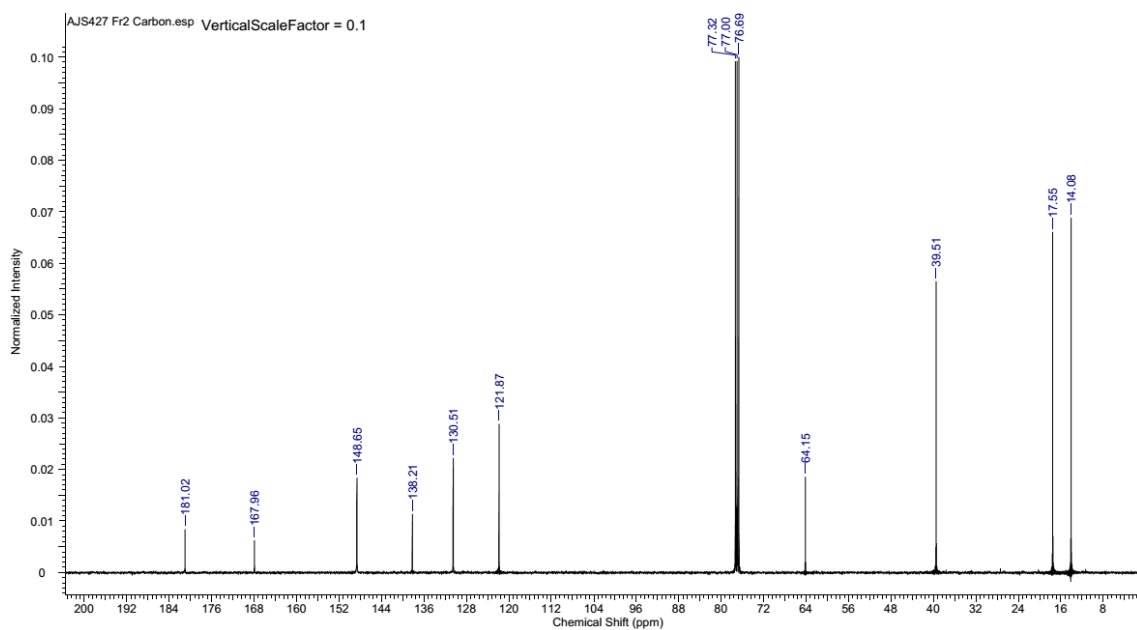

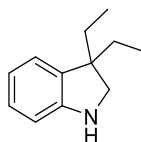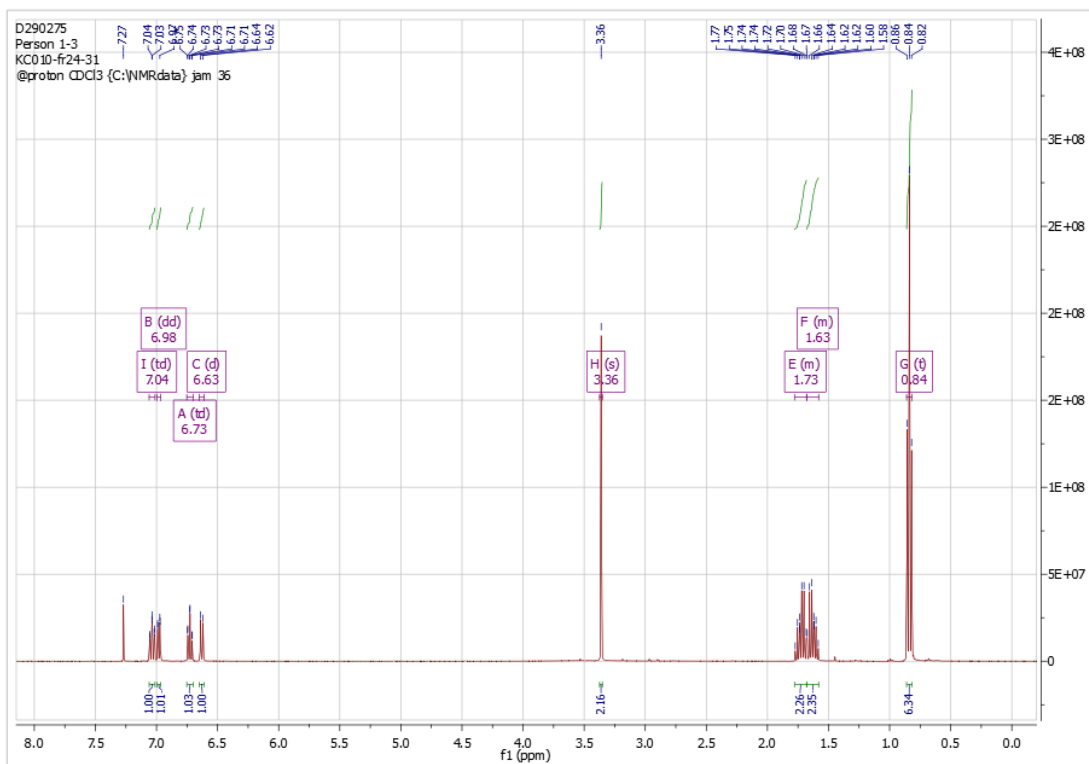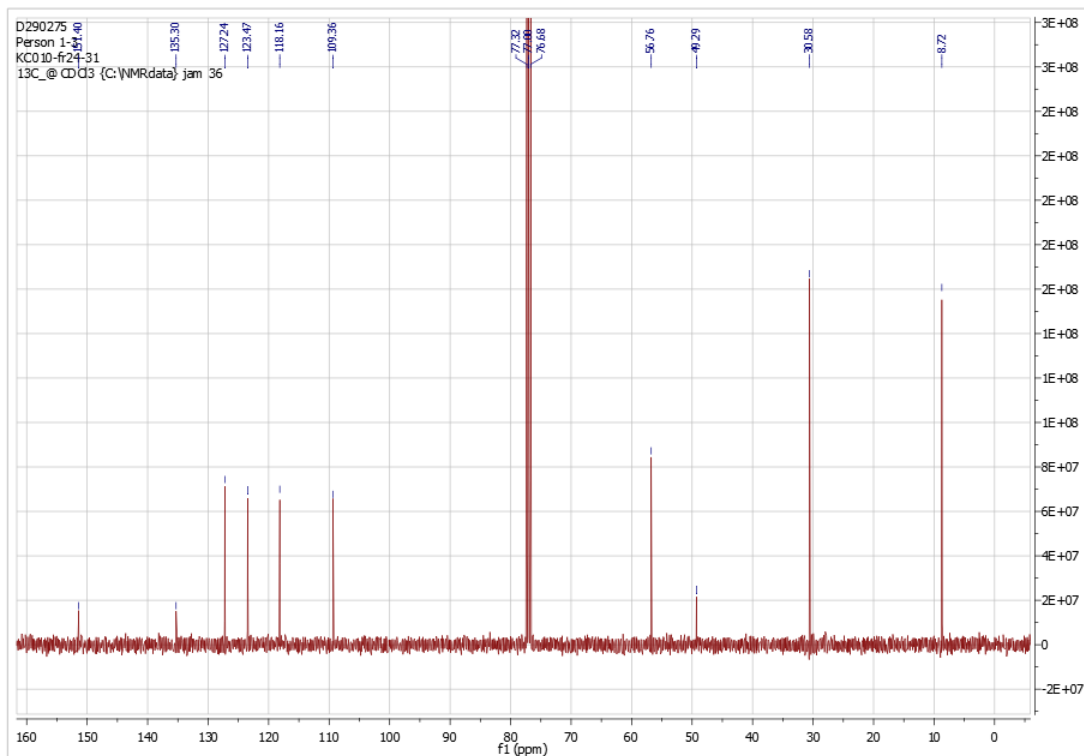



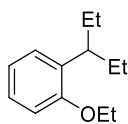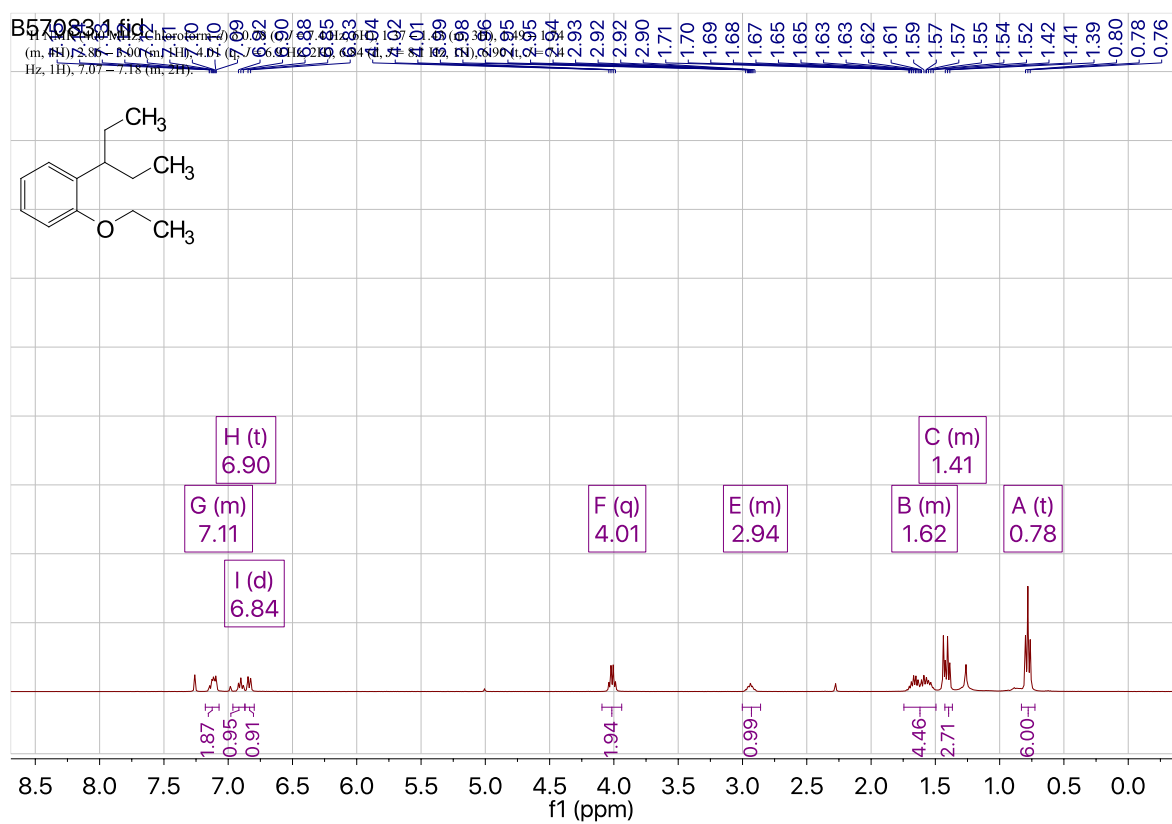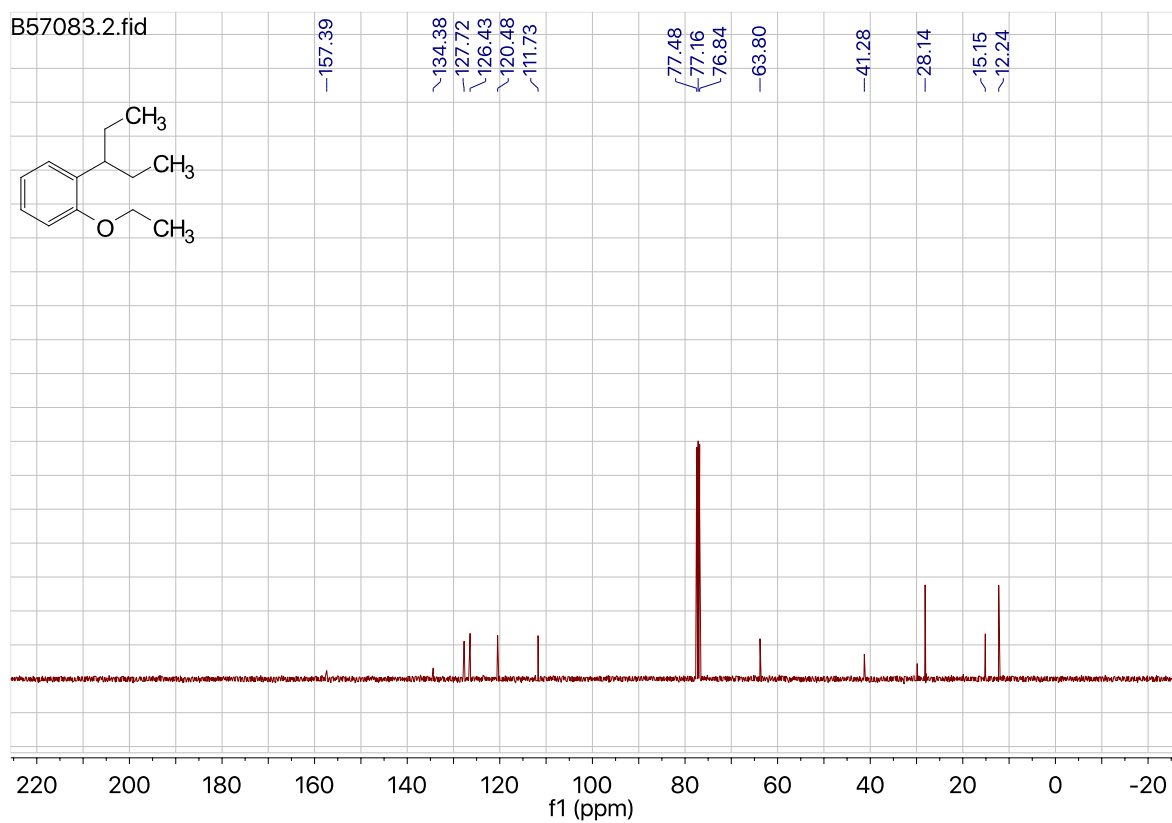

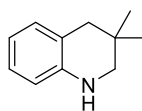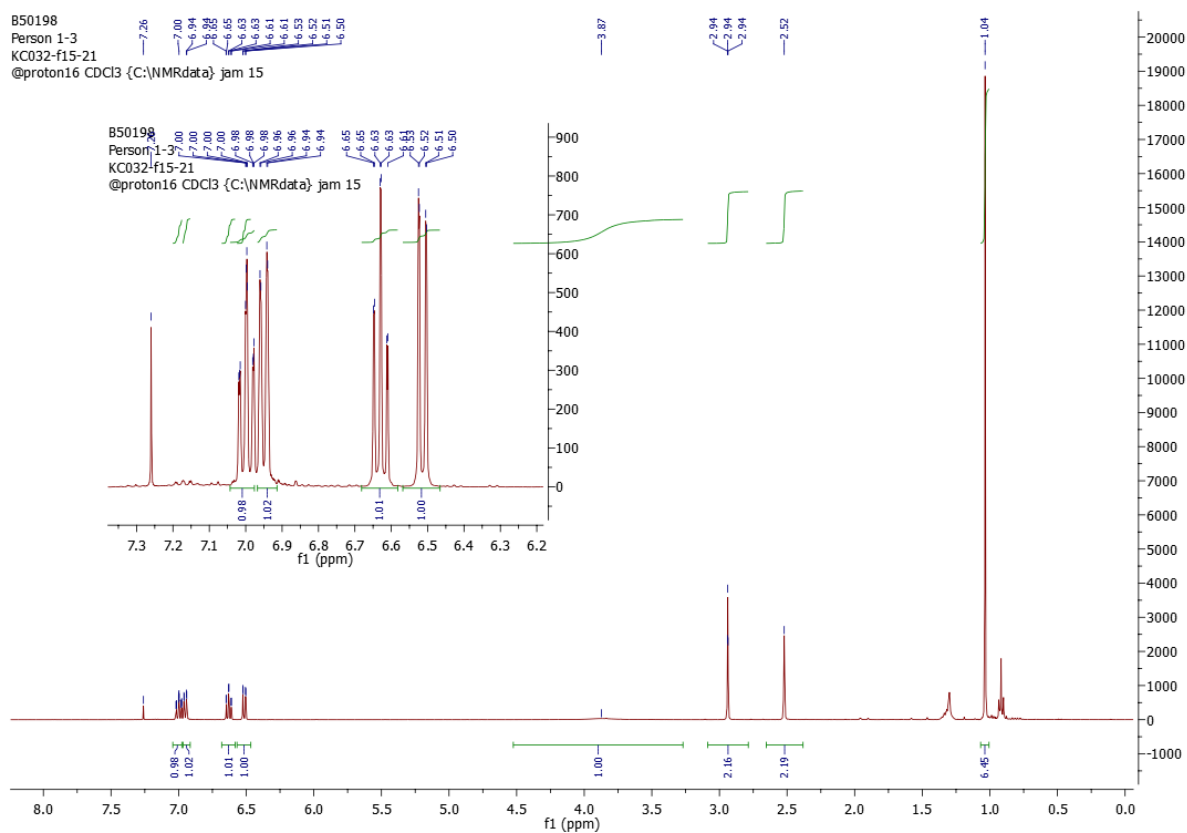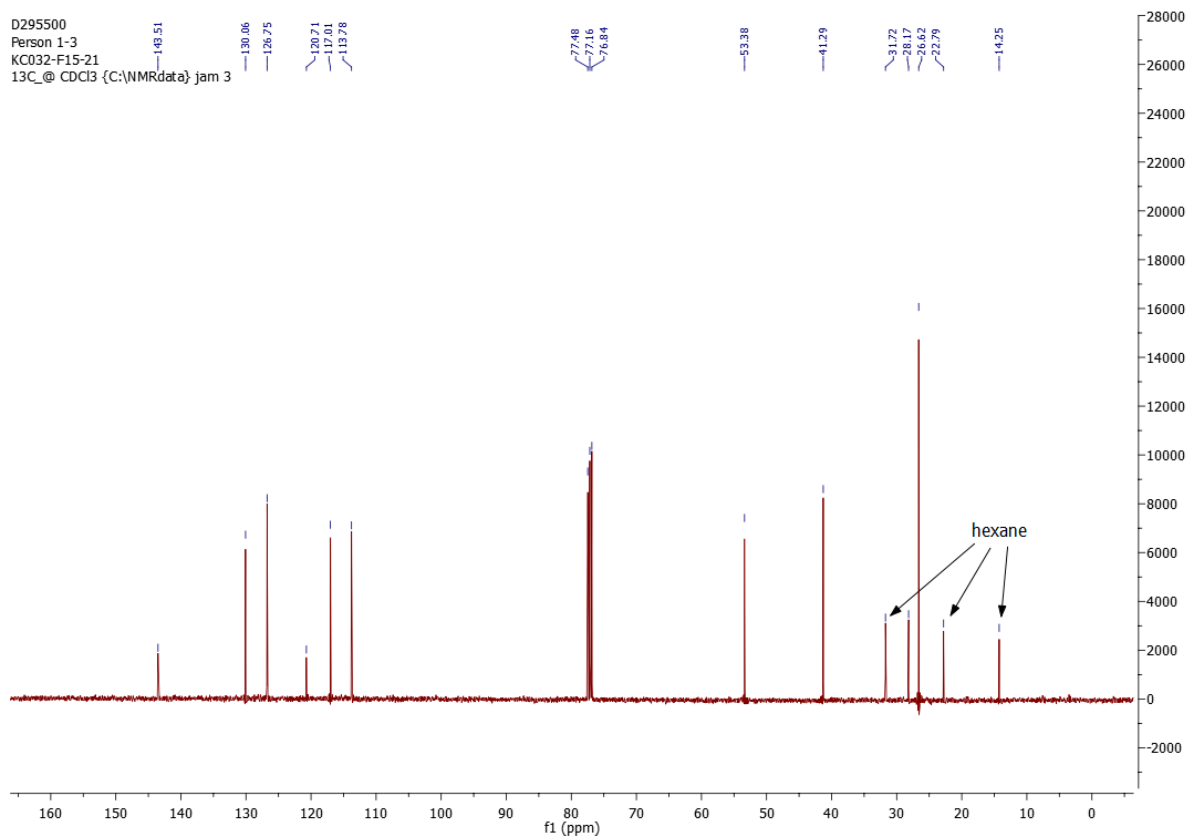

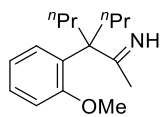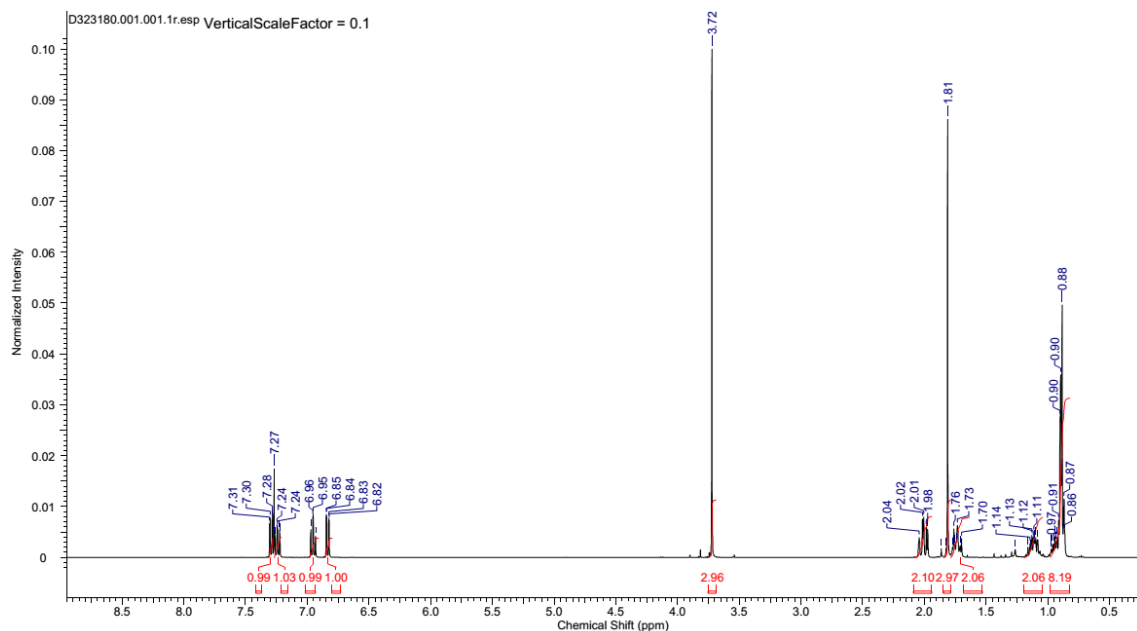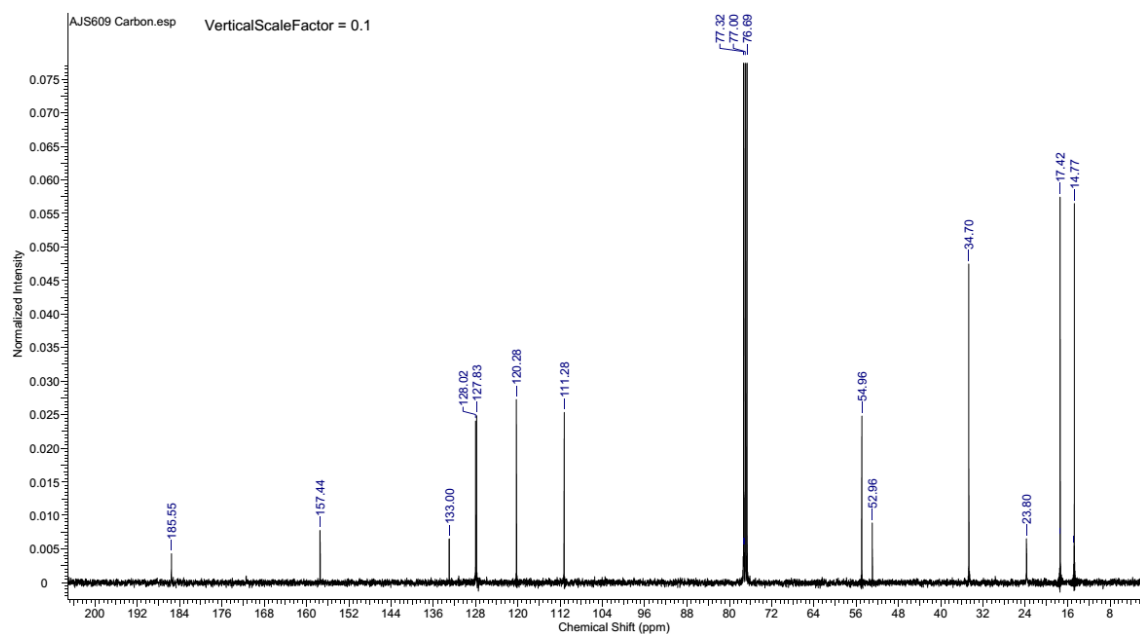

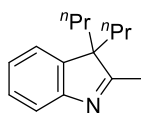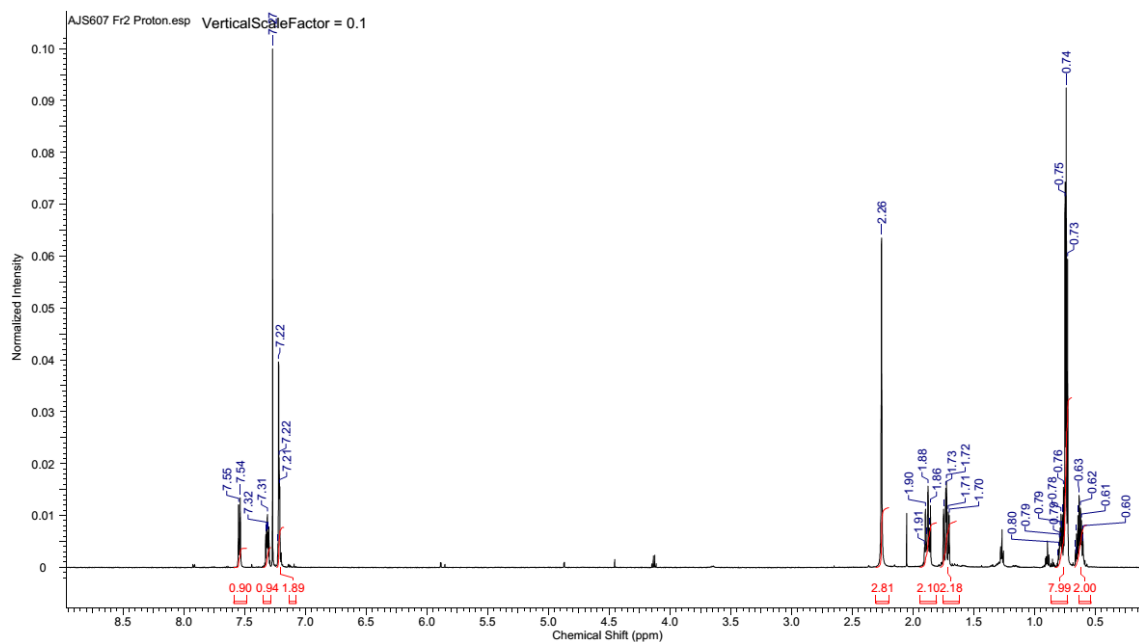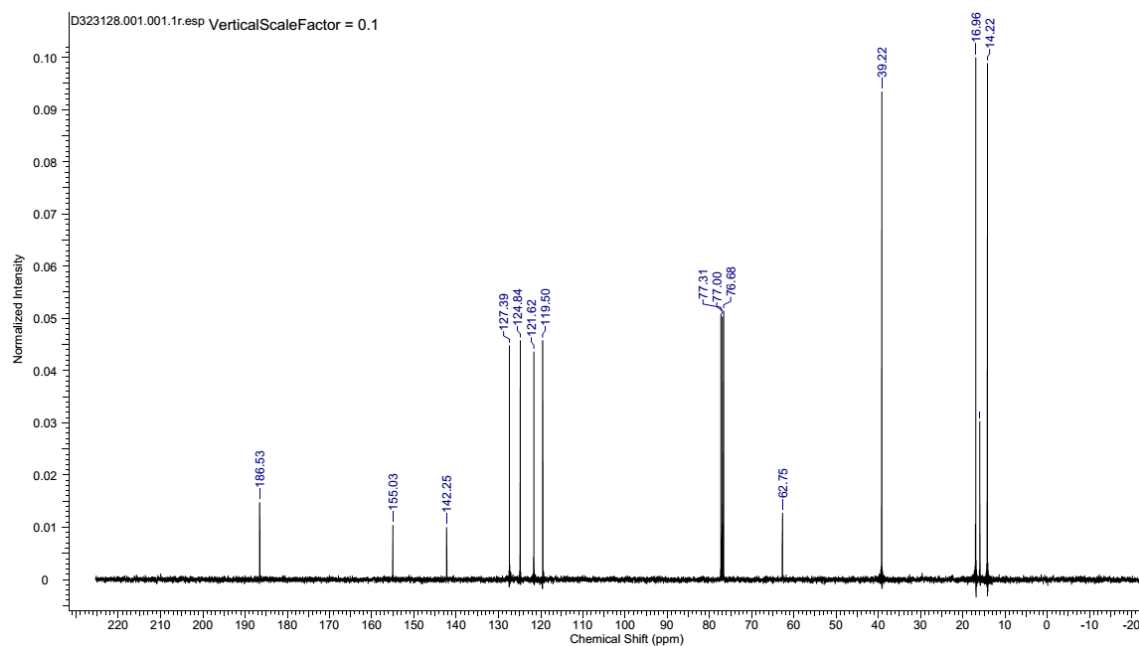

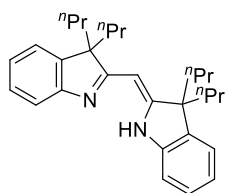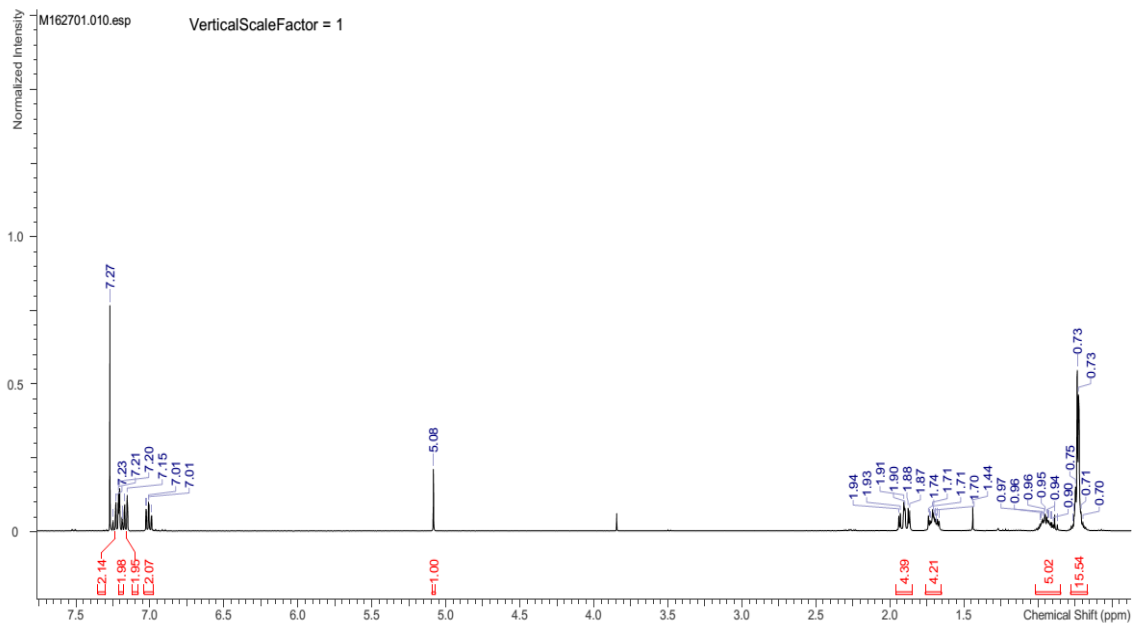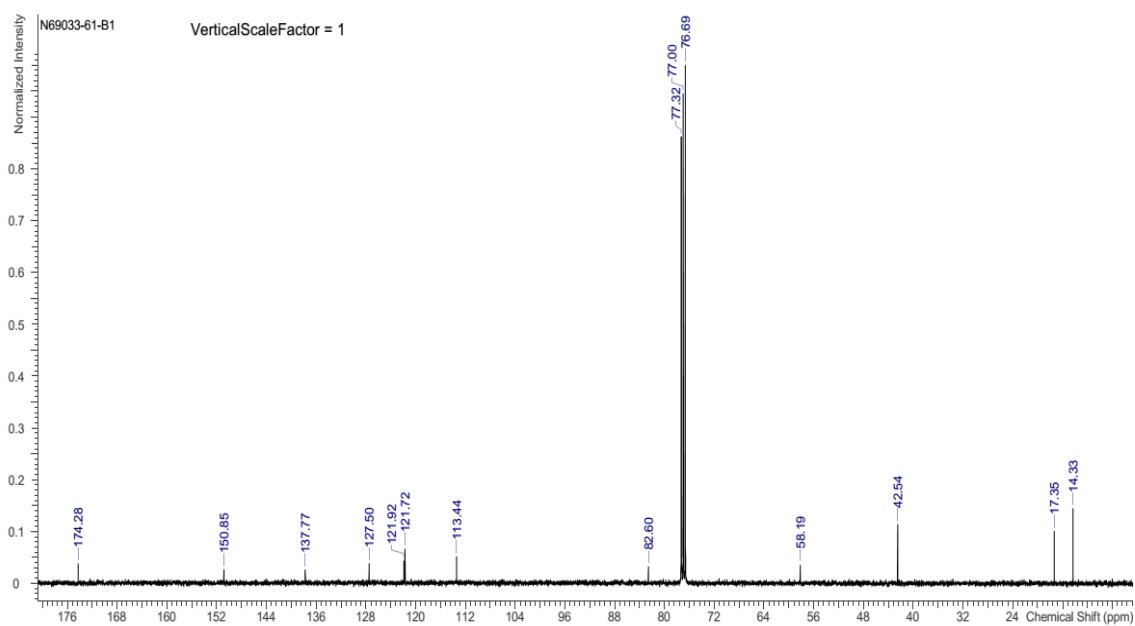

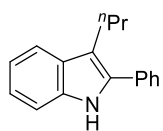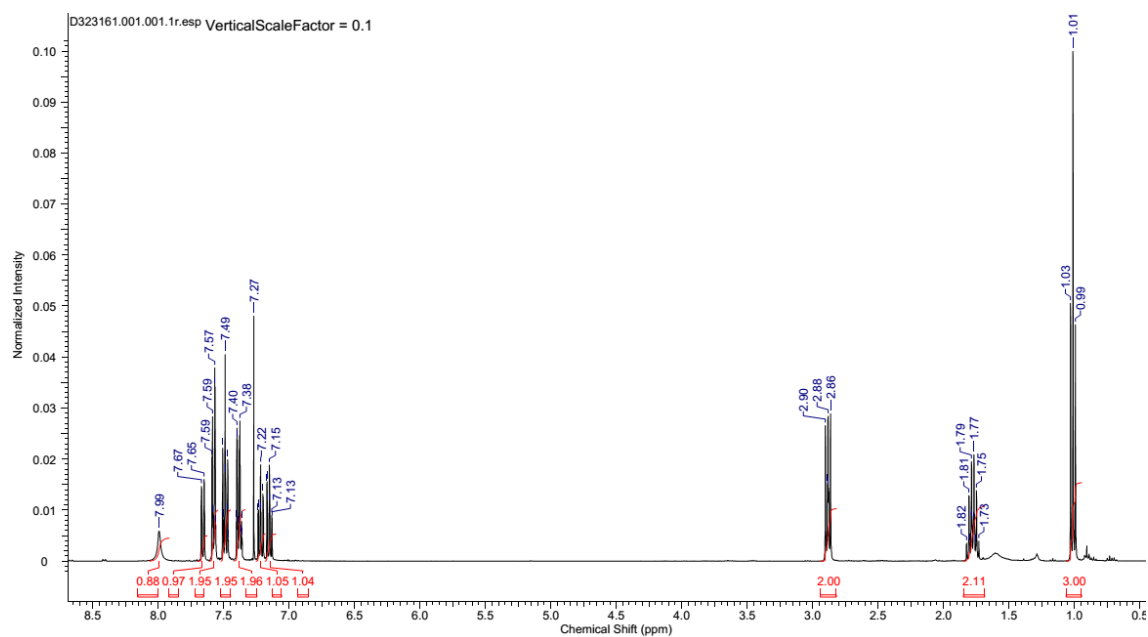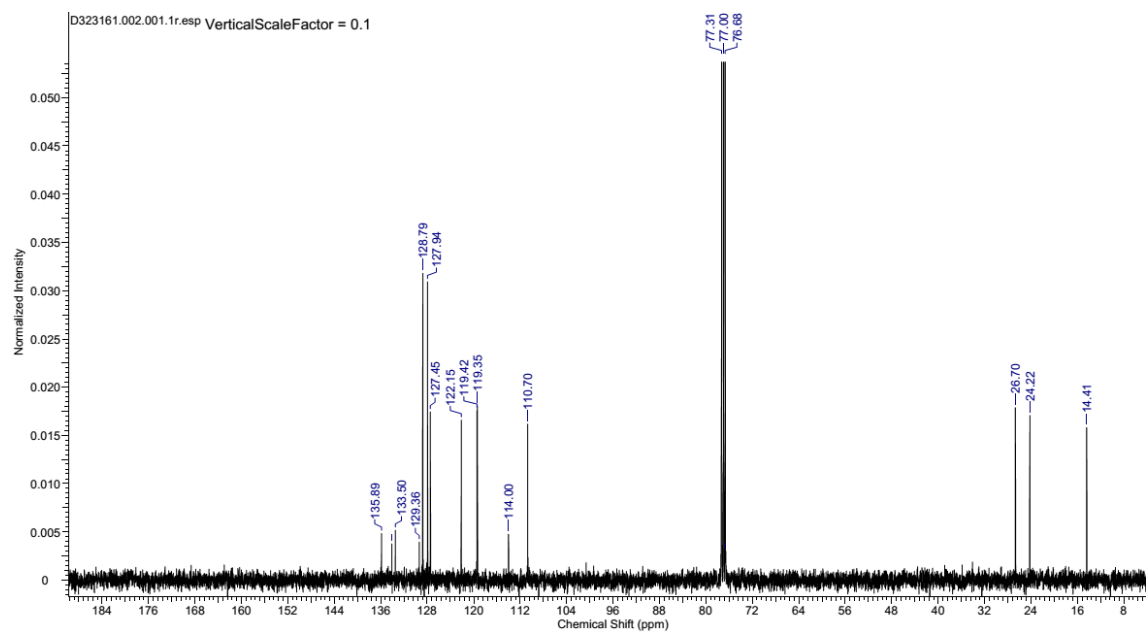

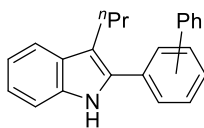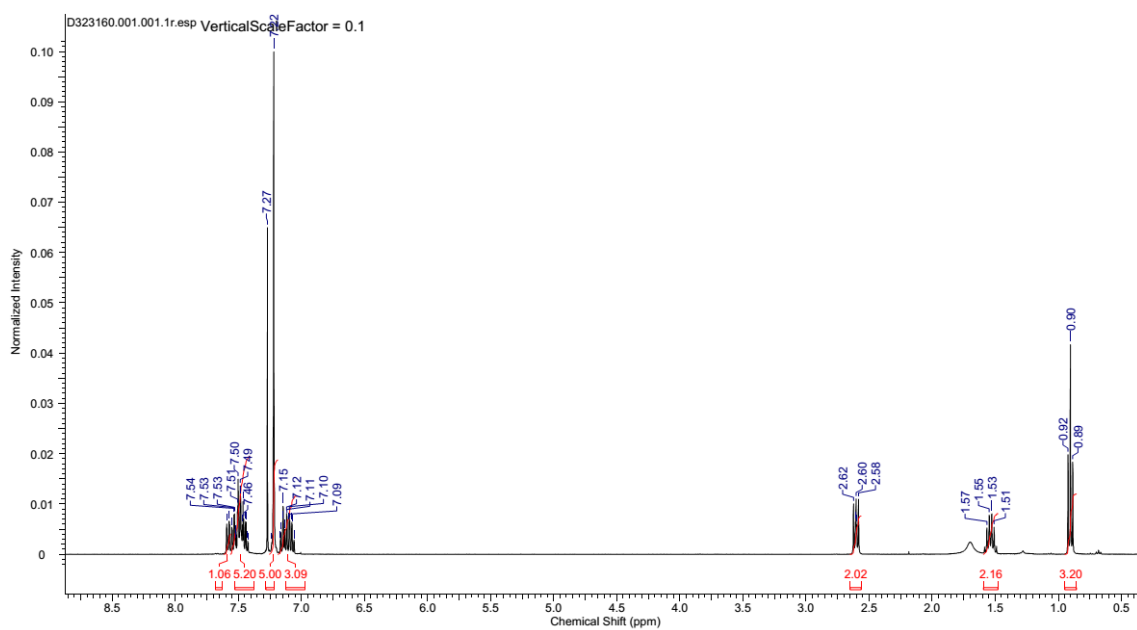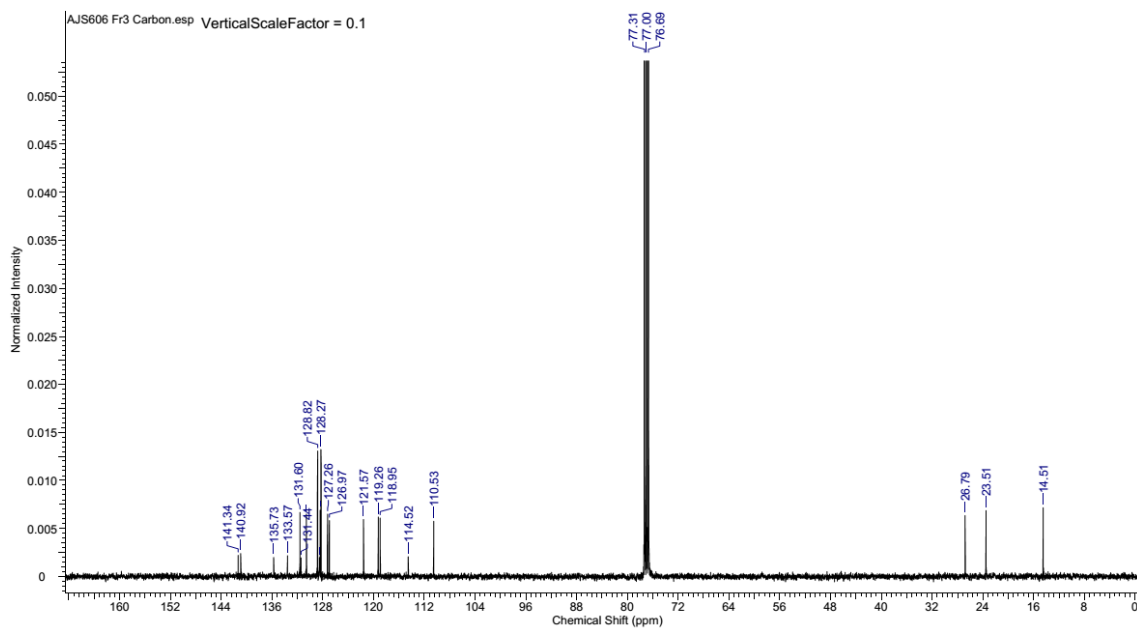

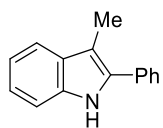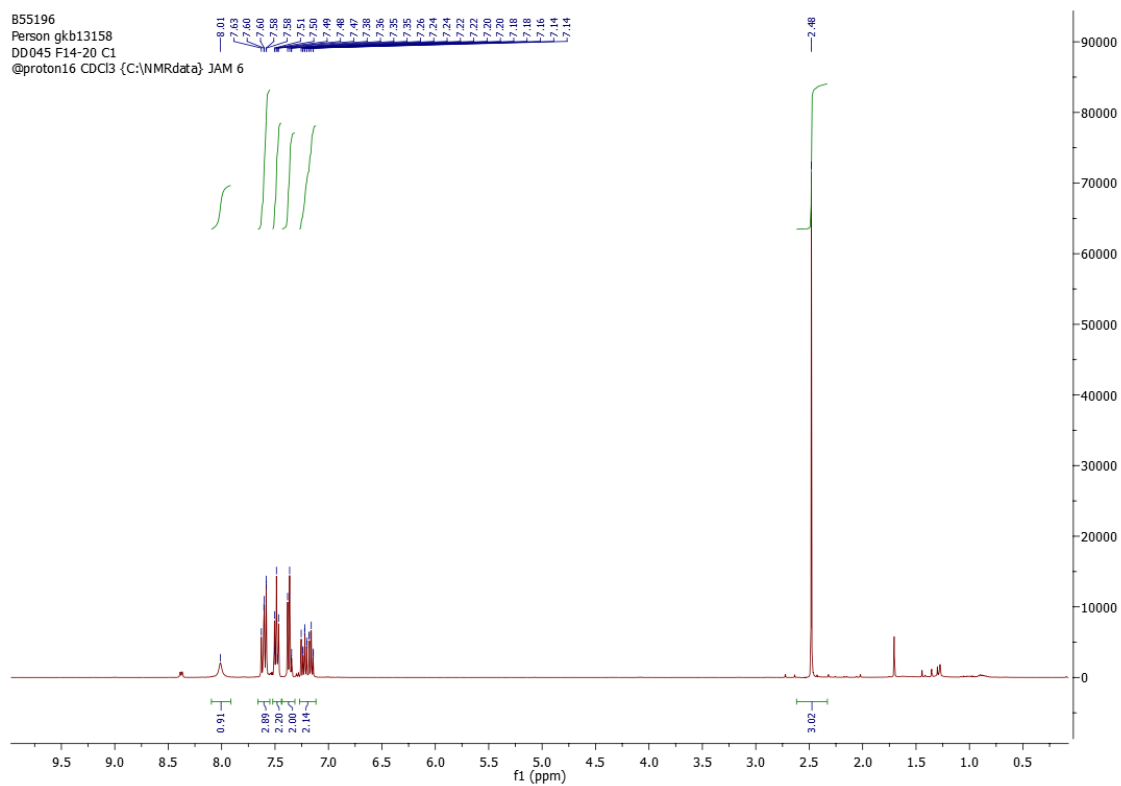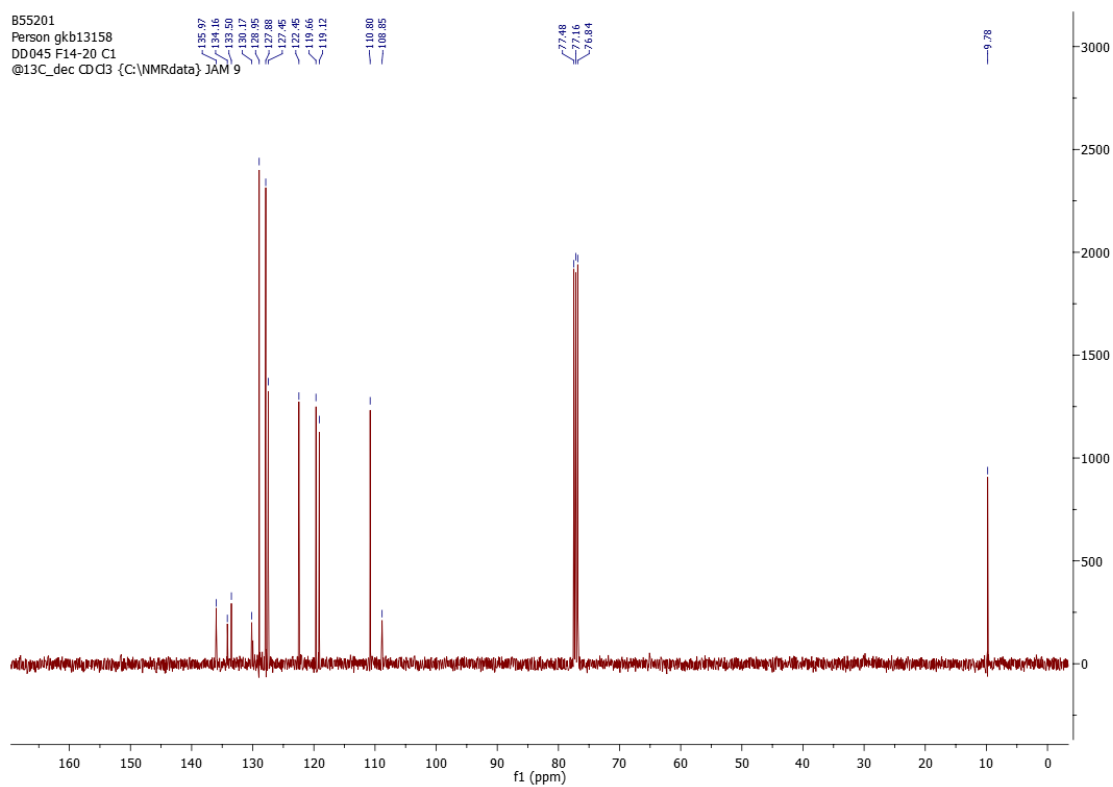



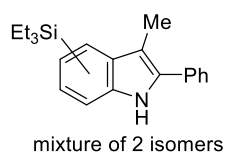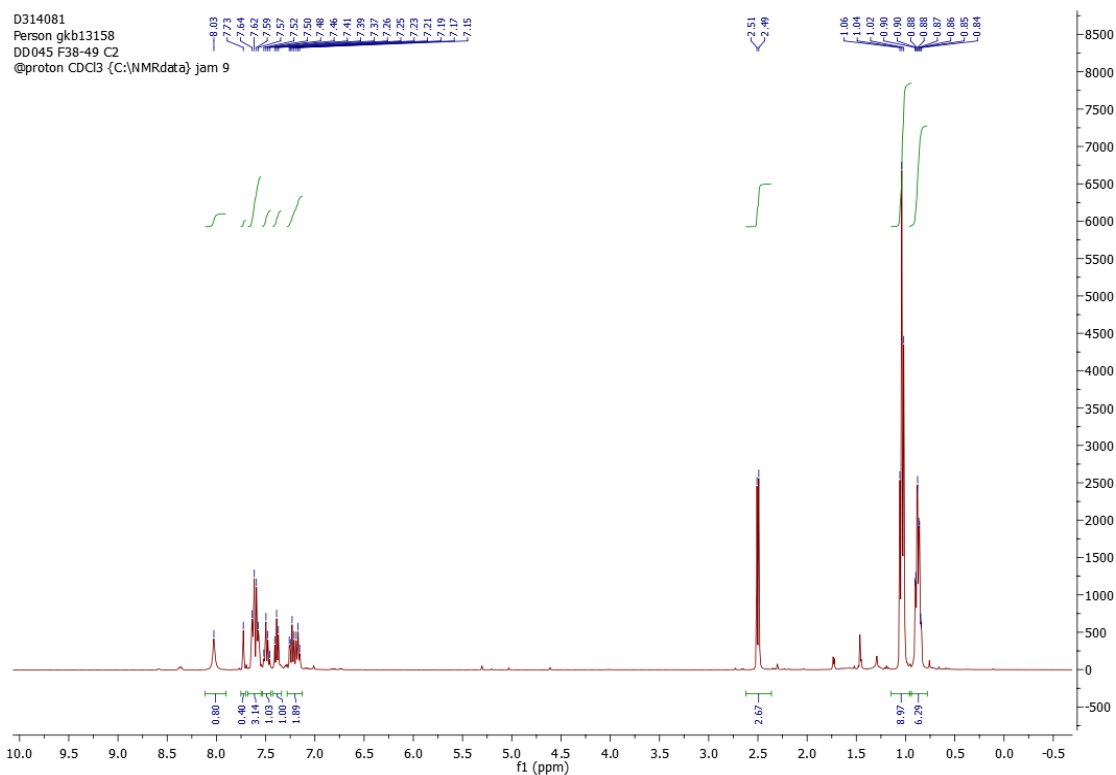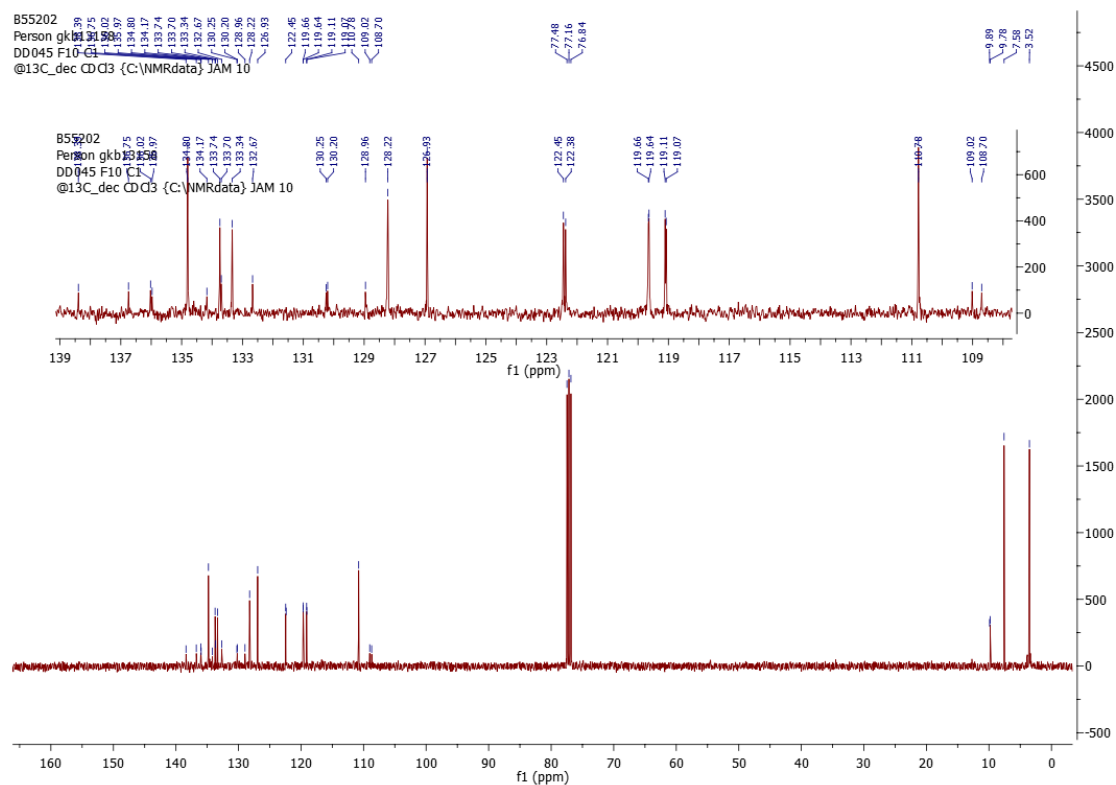

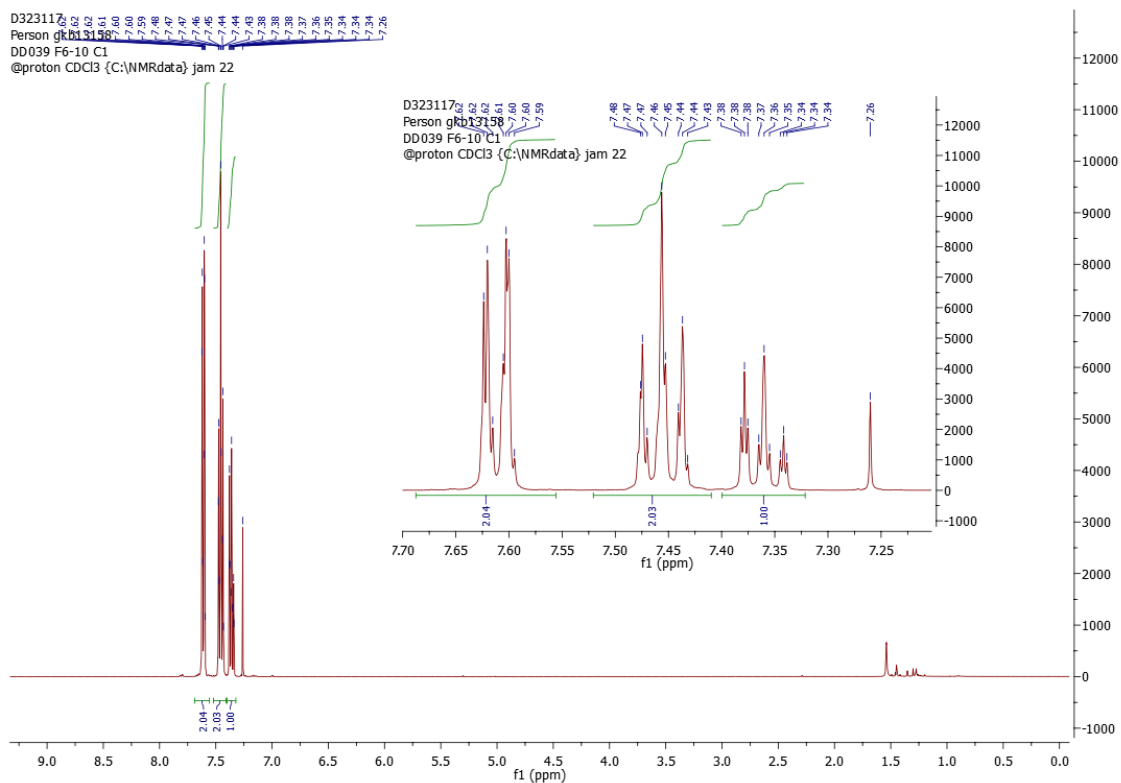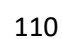

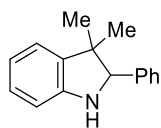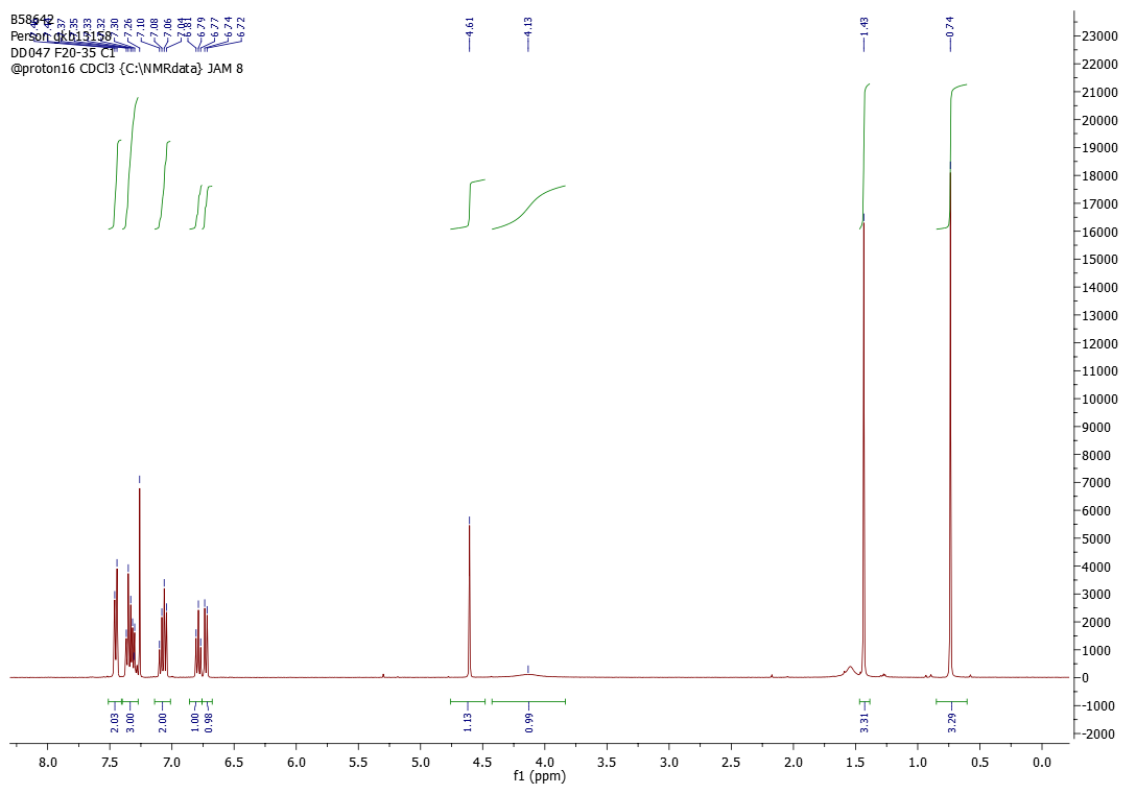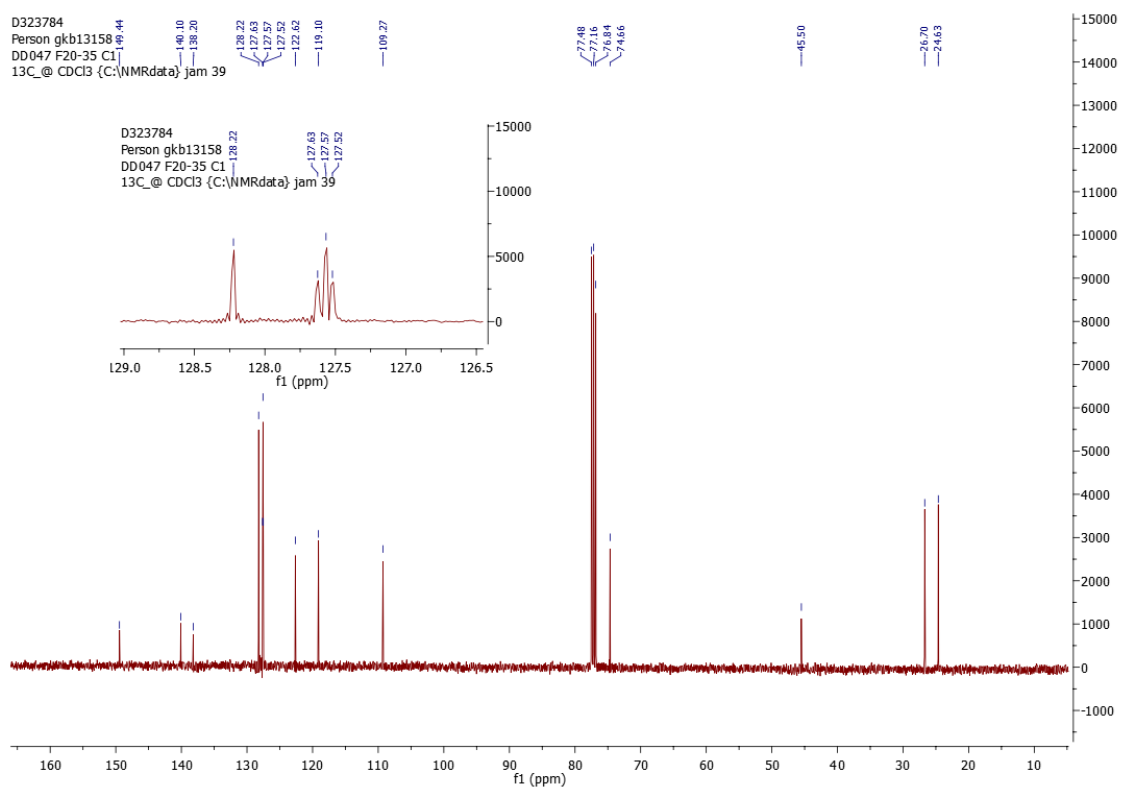

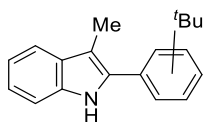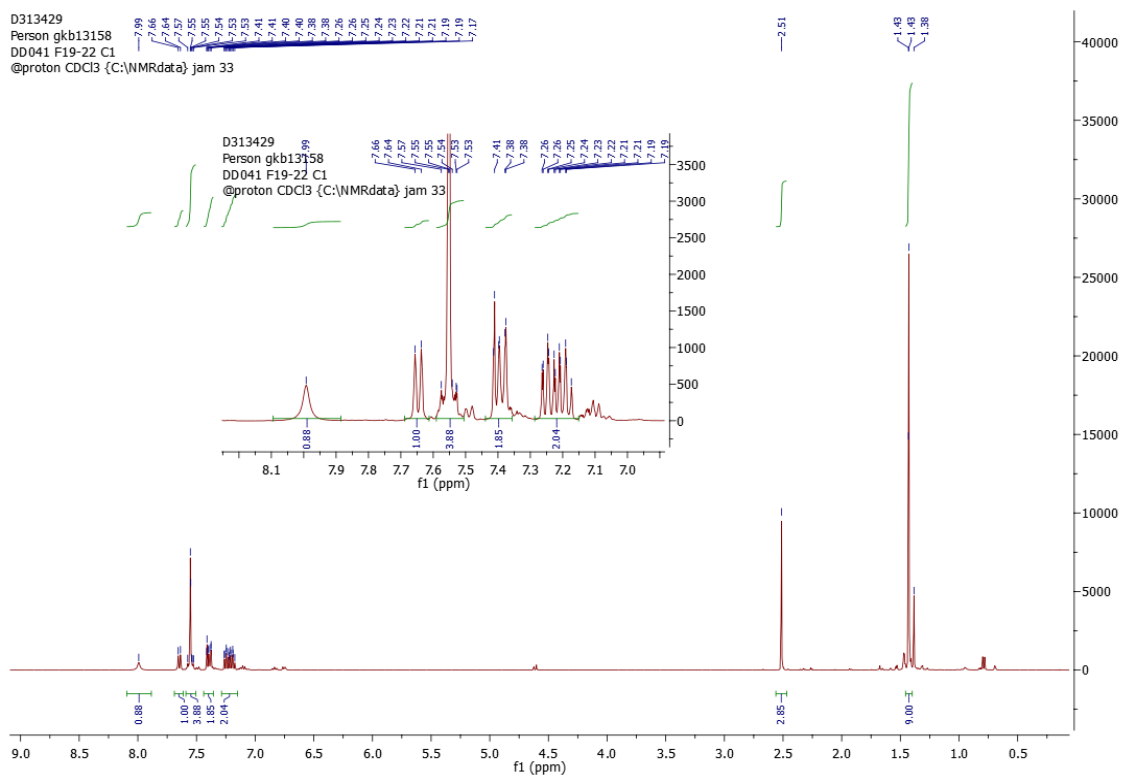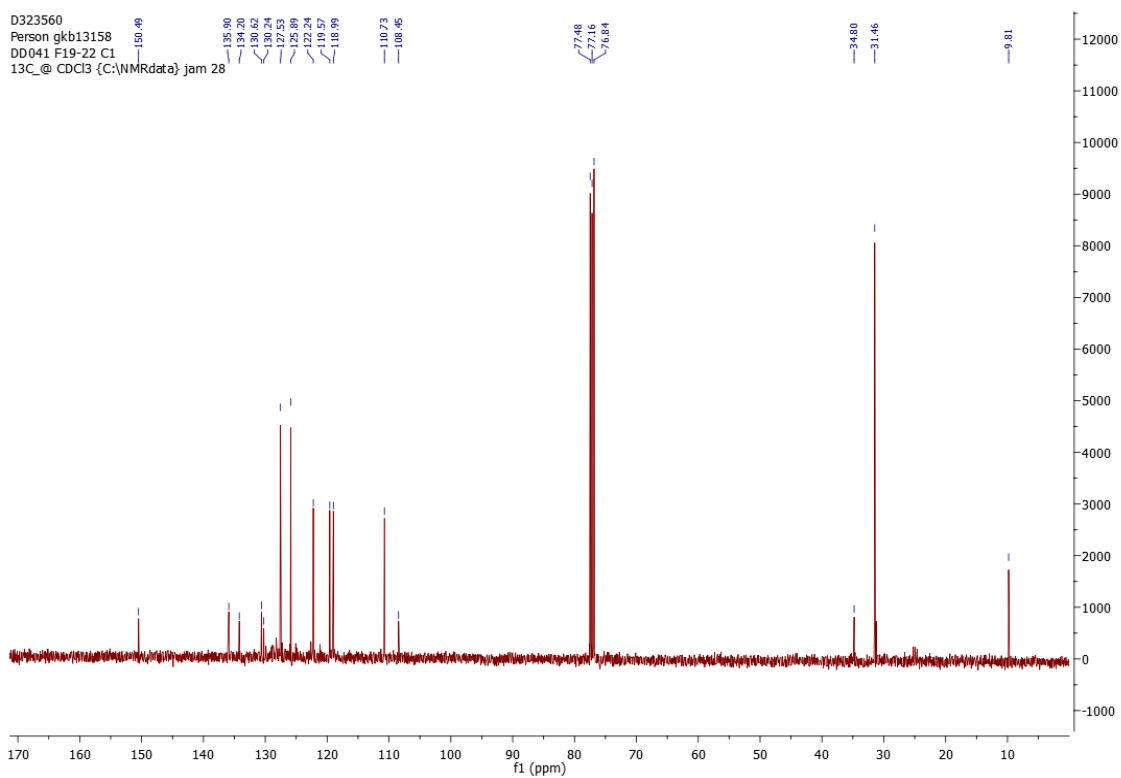

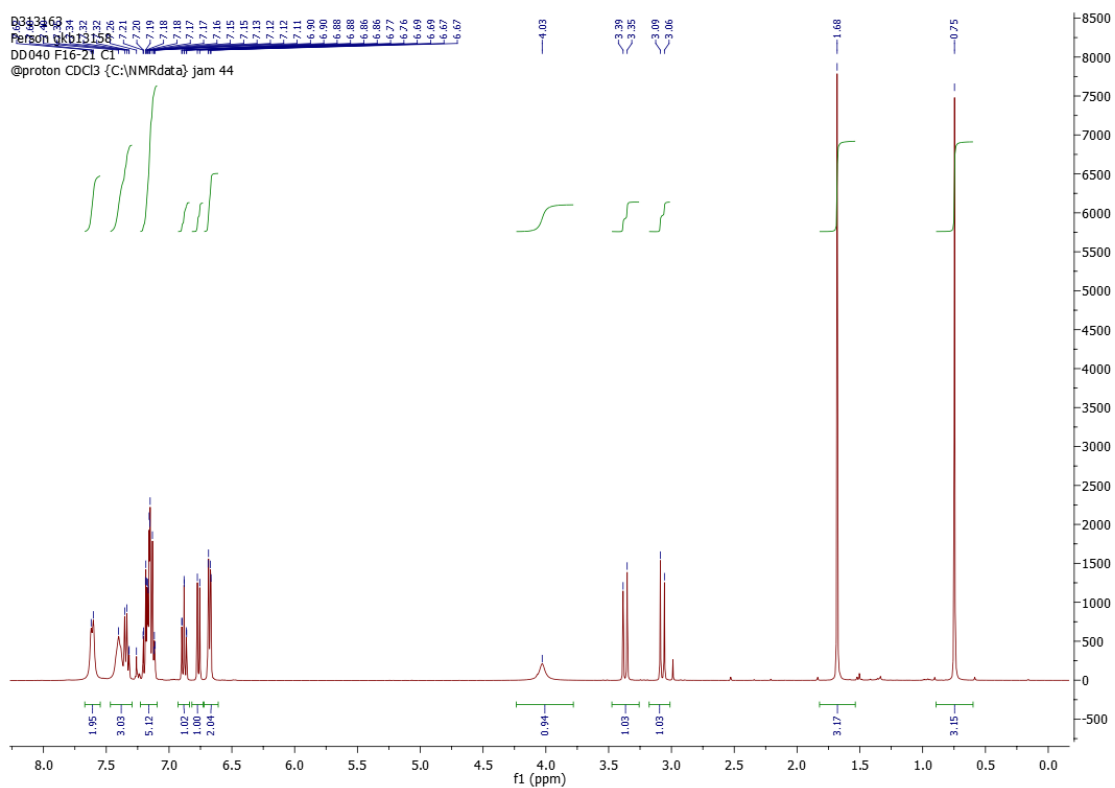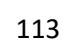

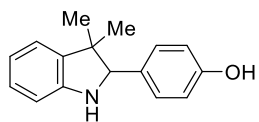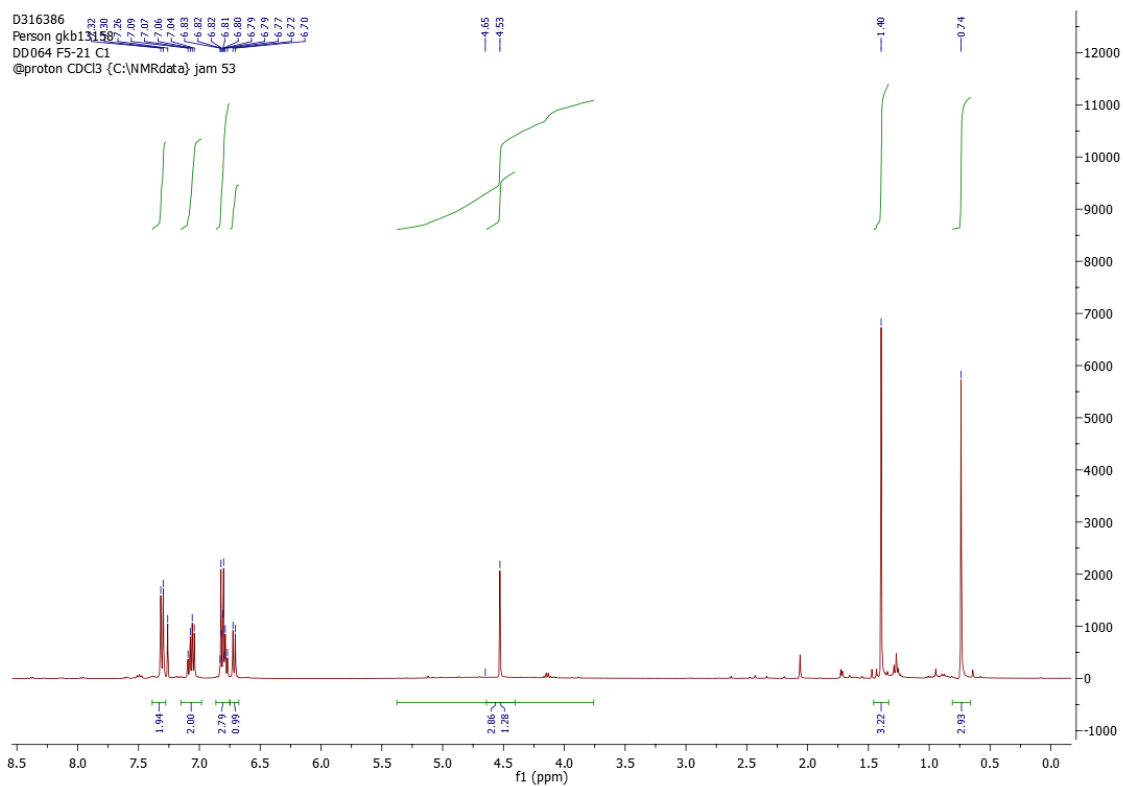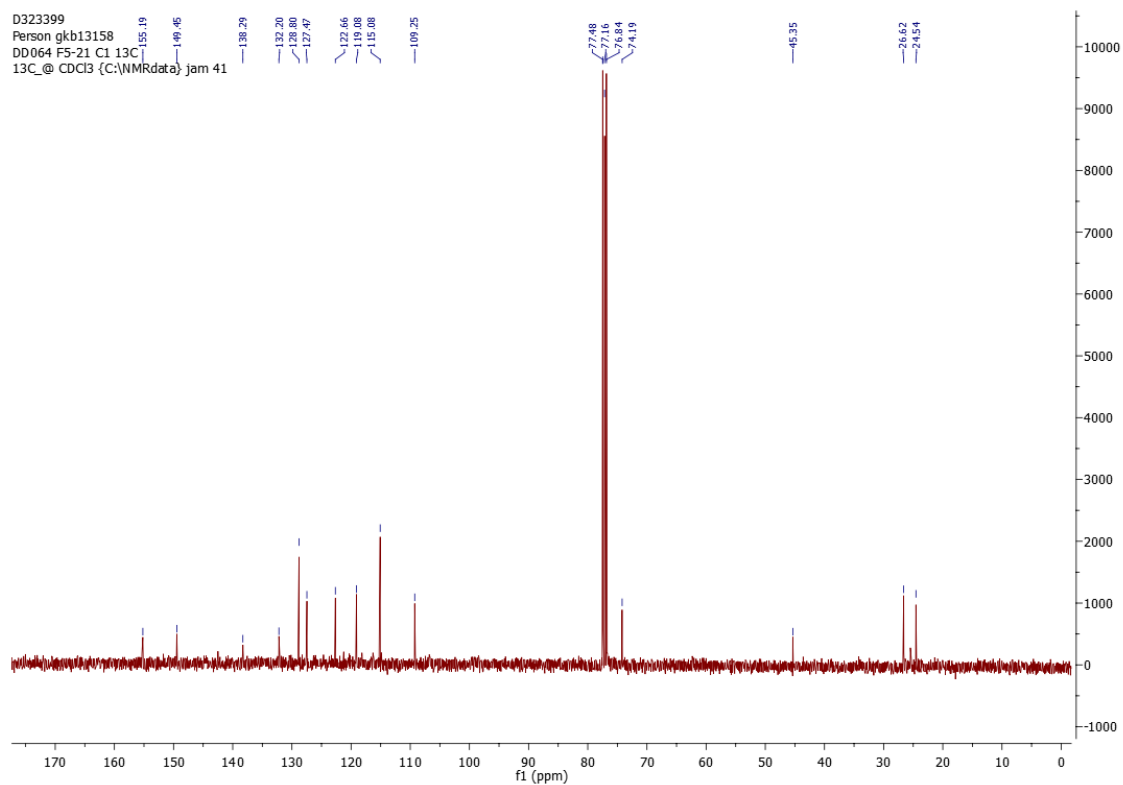

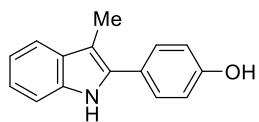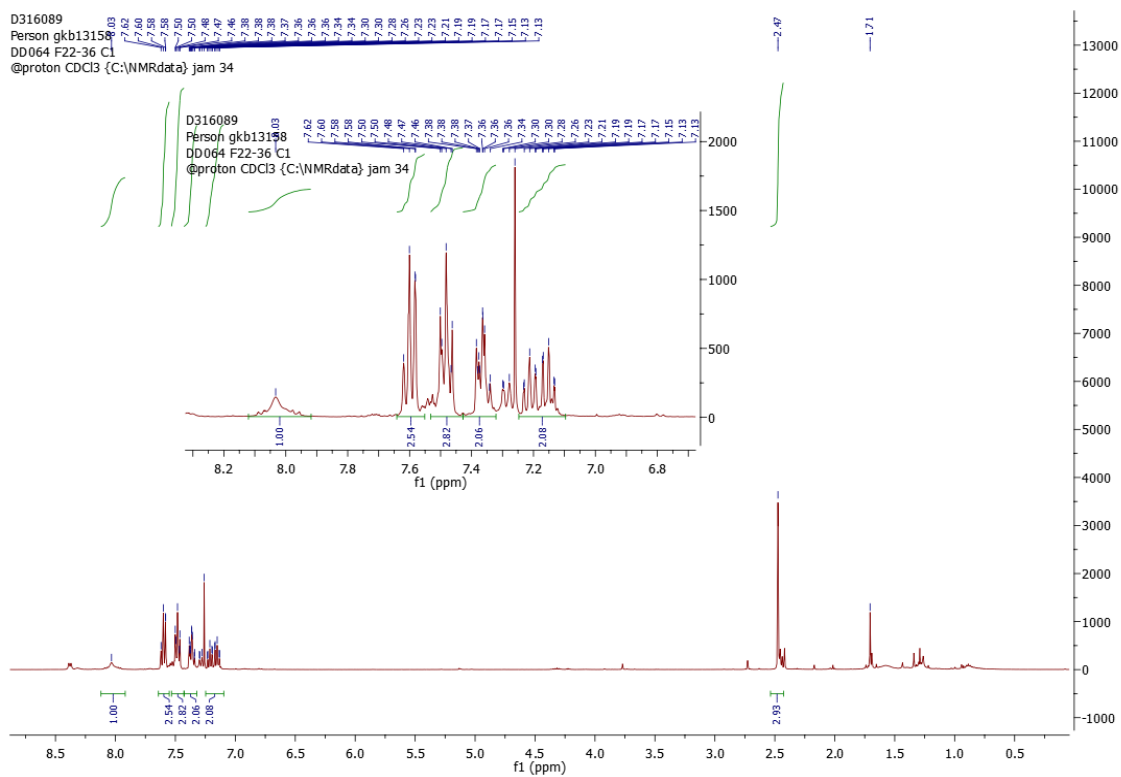

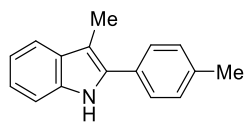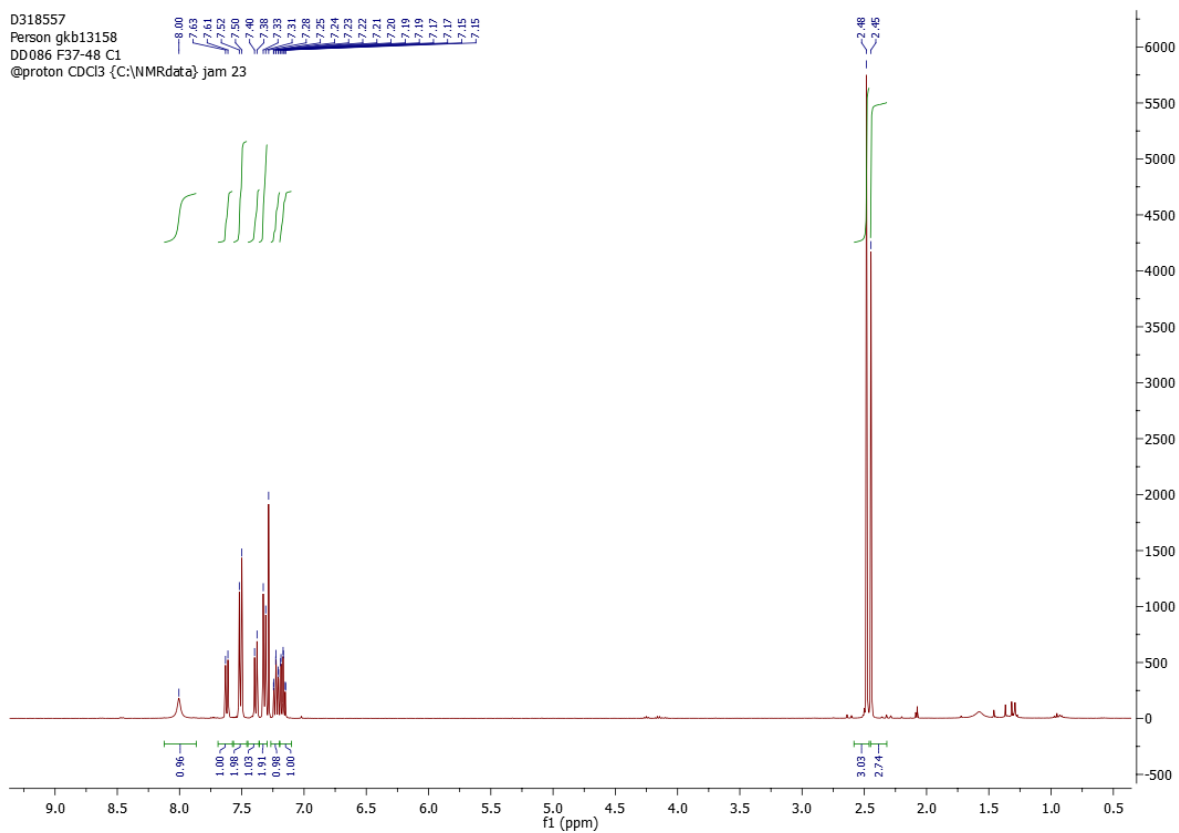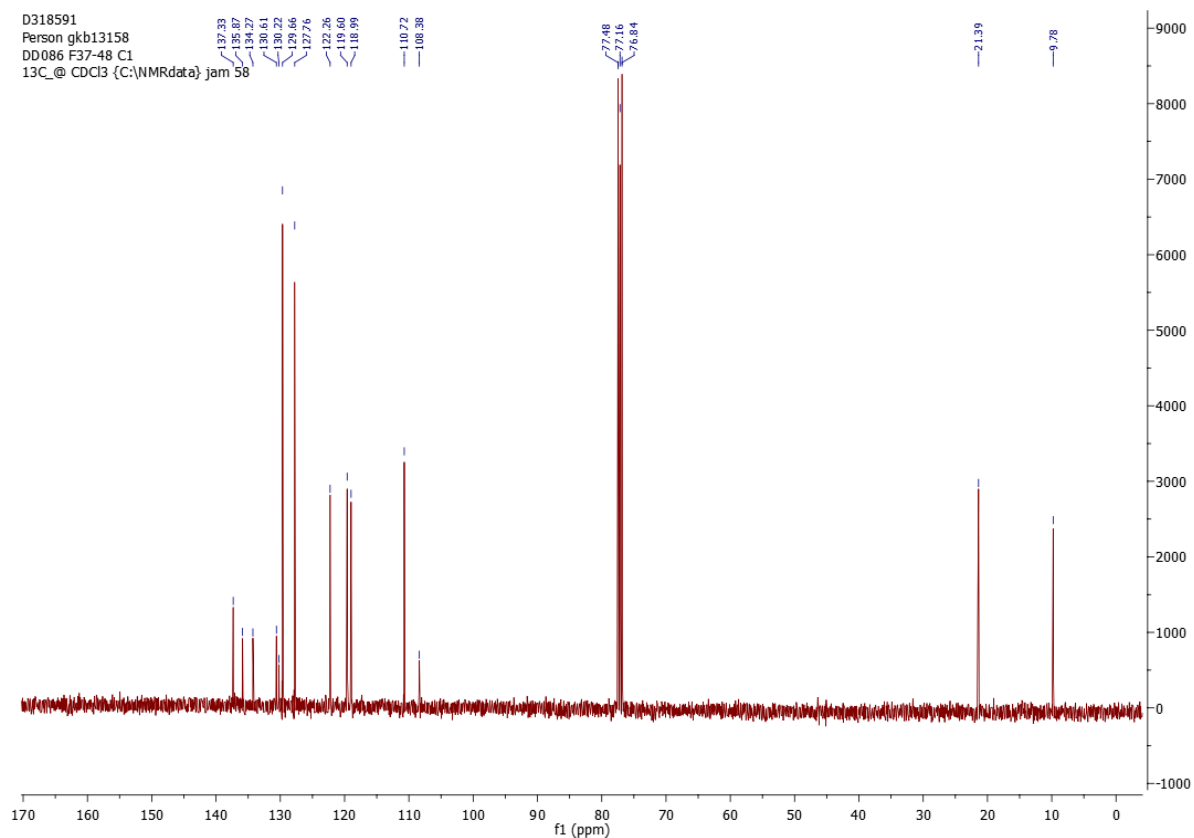



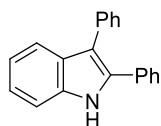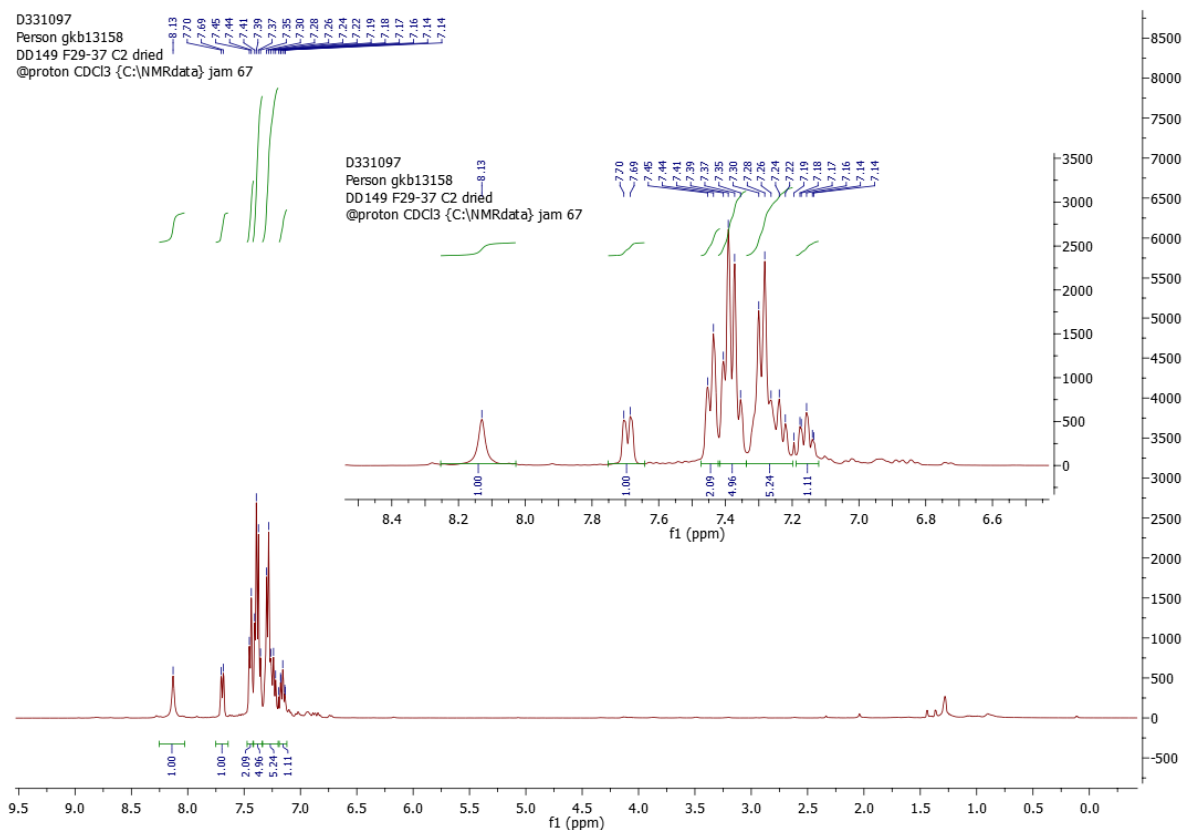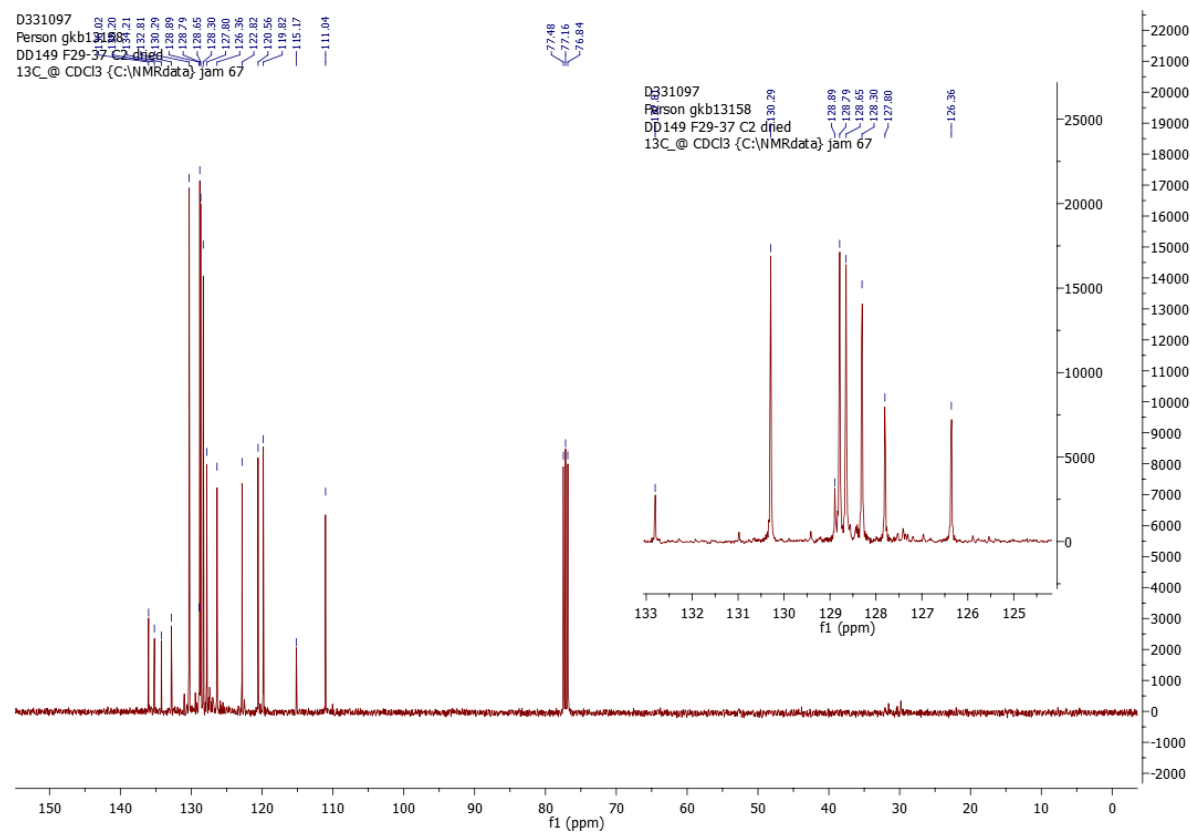

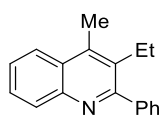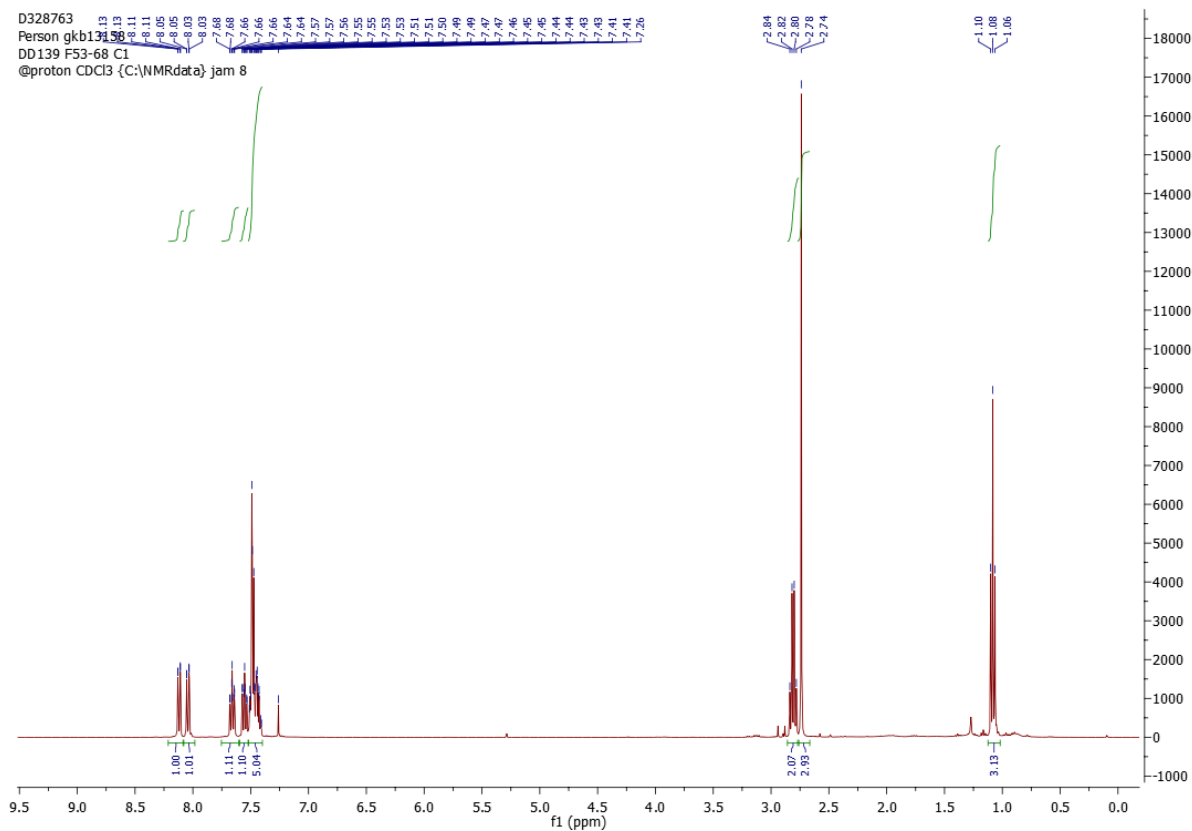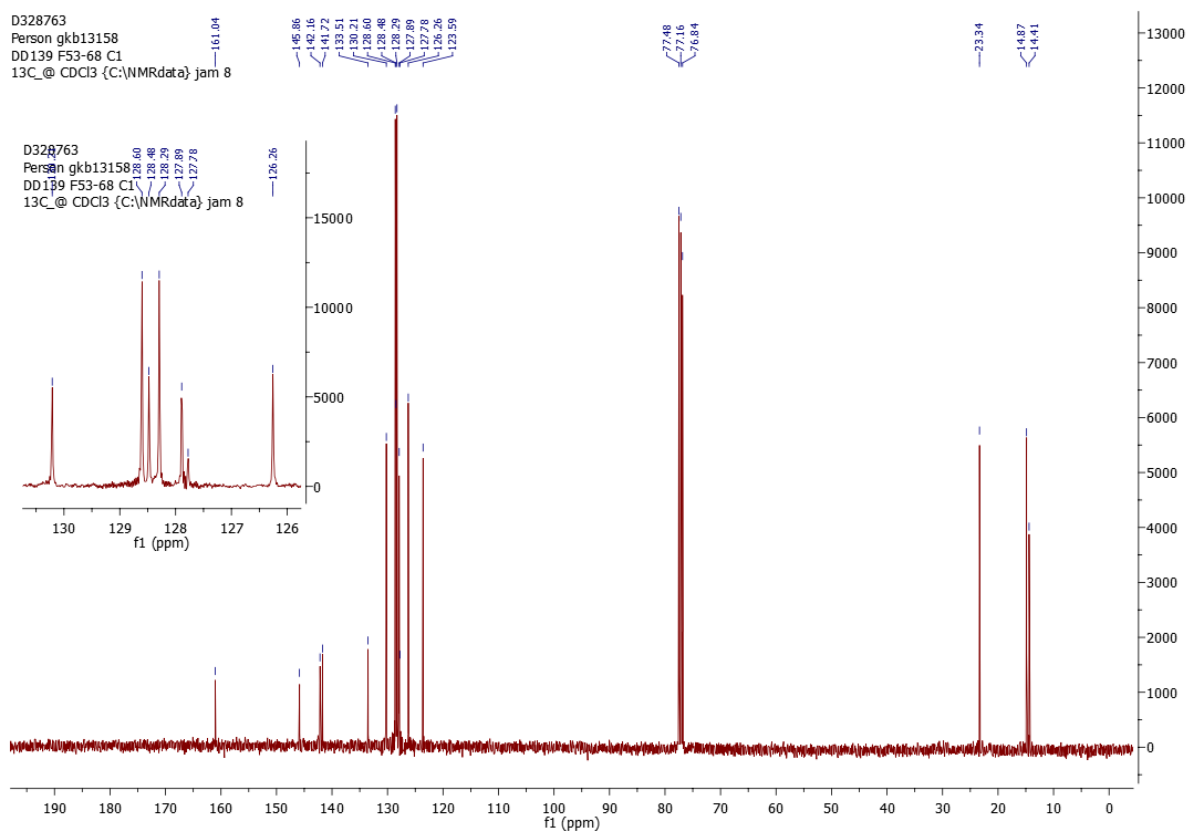

# NOESY

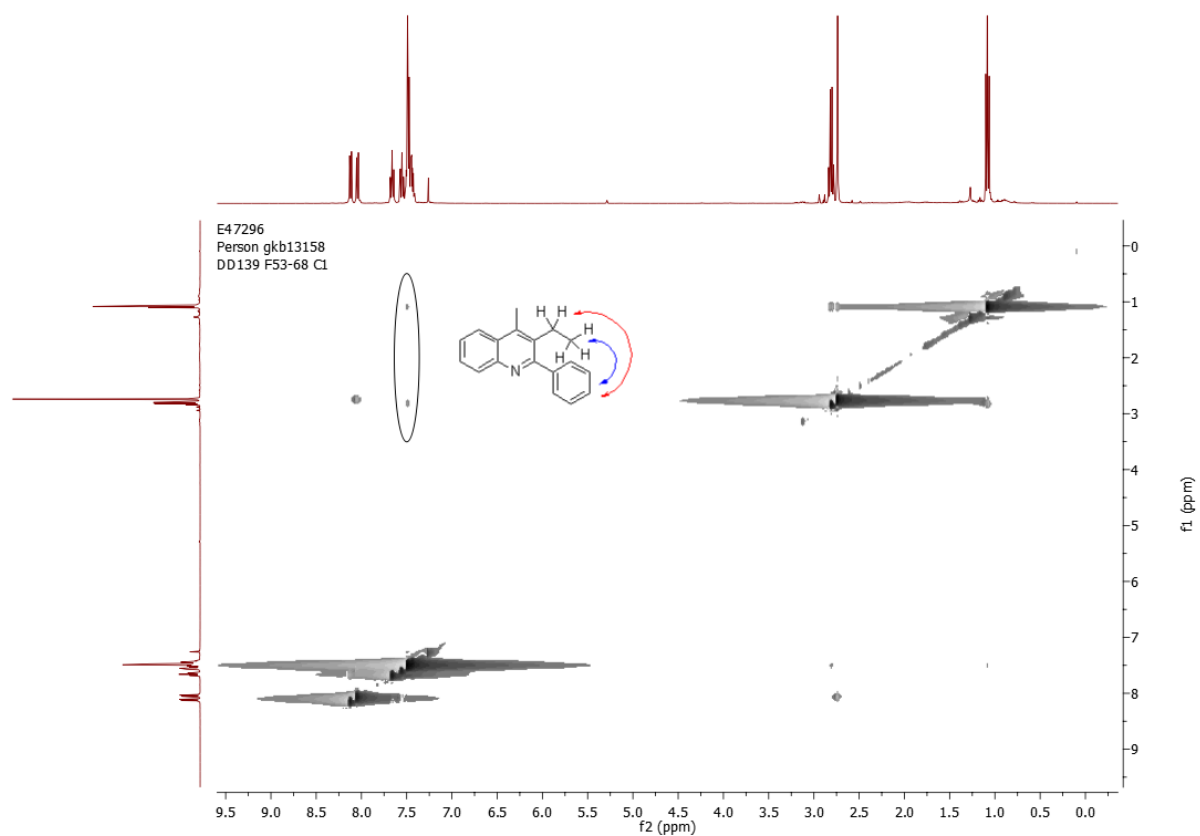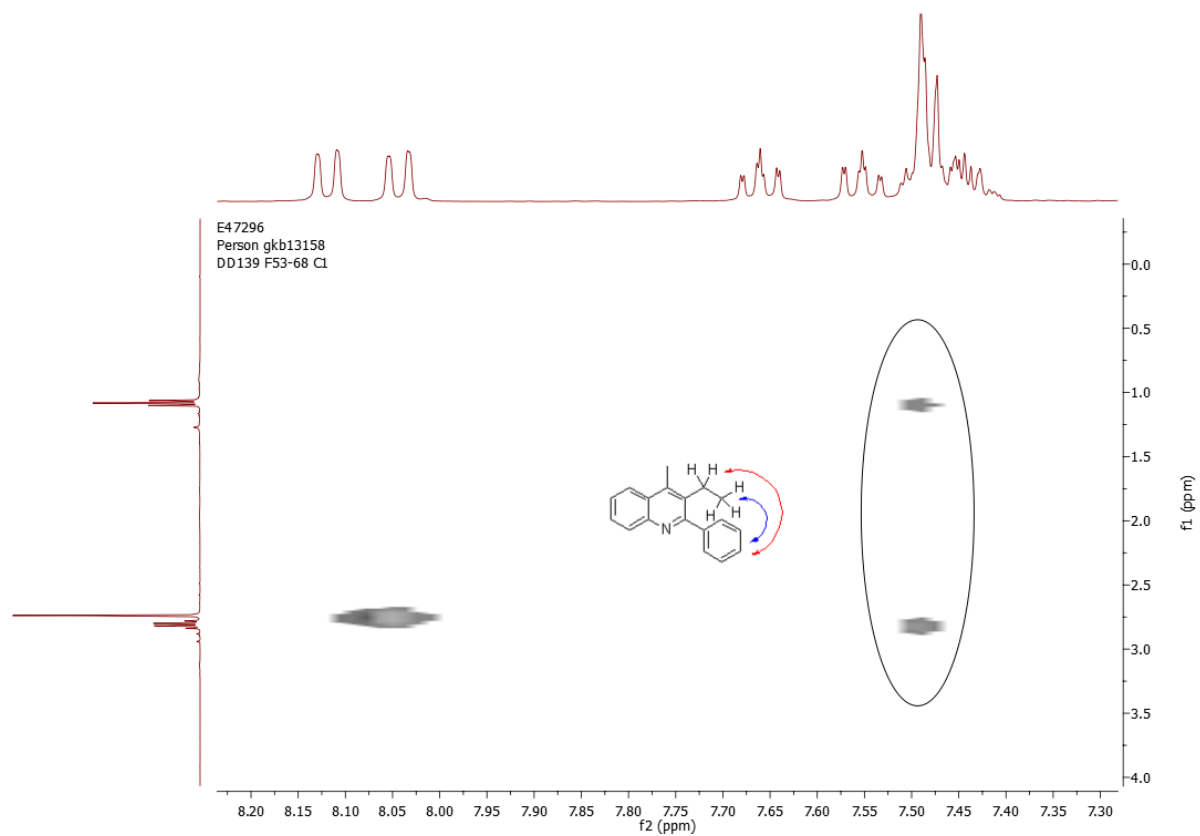

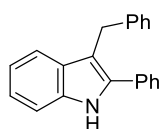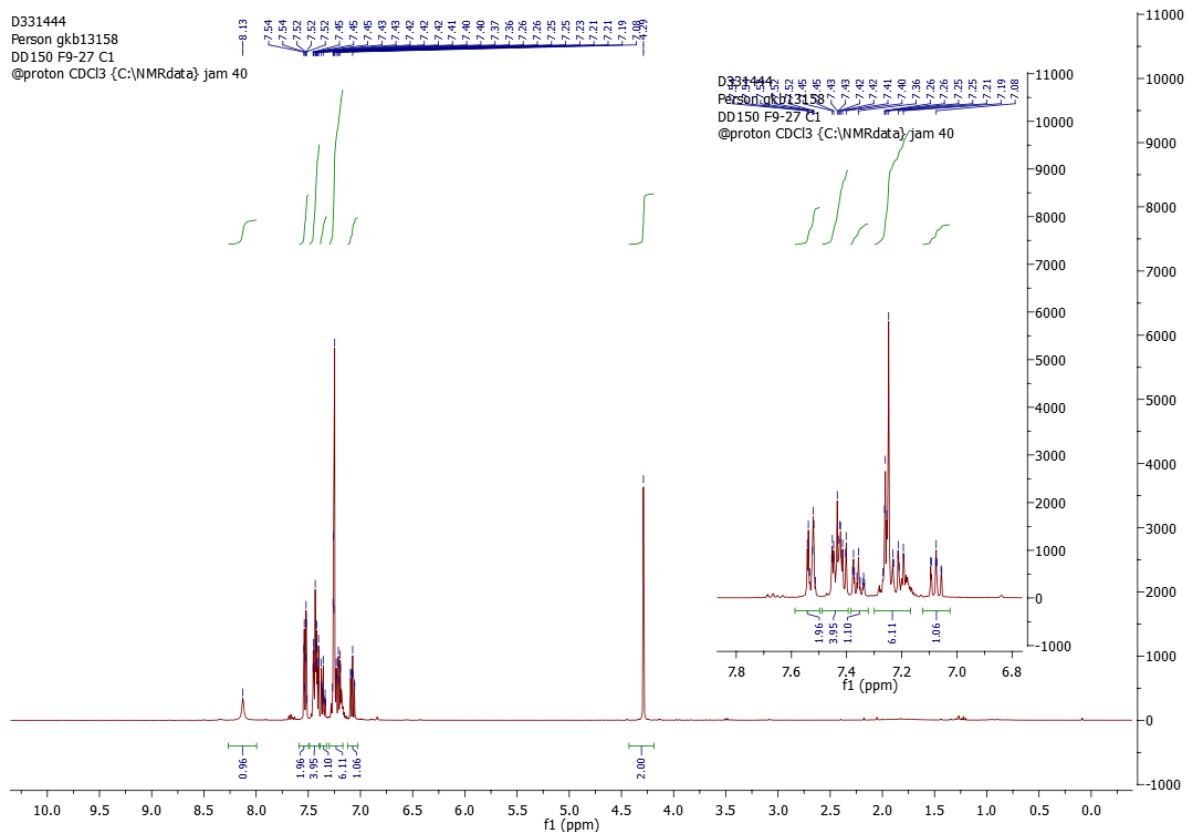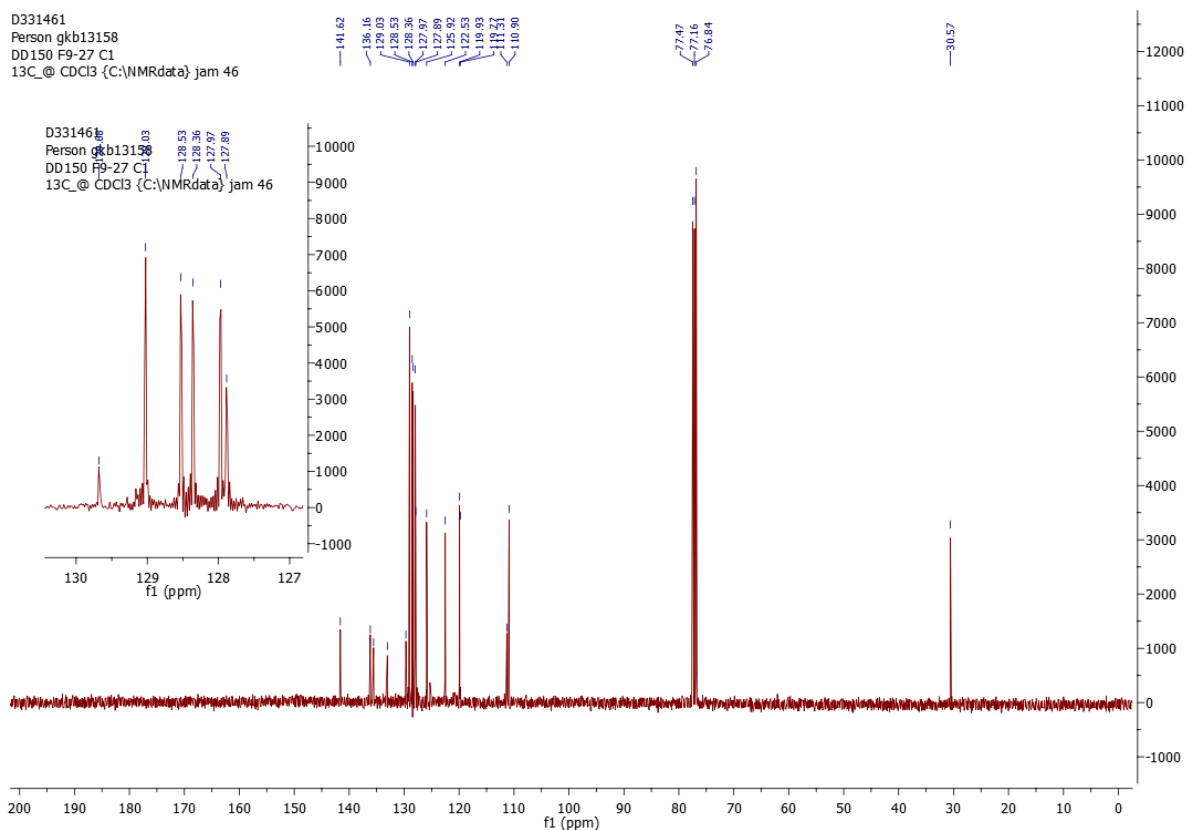

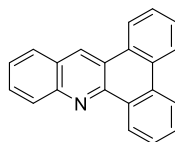

D332077  
Person gkb13158  
DD150 F40-3 C1 Recrystallised, dried  
@proton CDCl3 {C:\NMRdata} jam 21

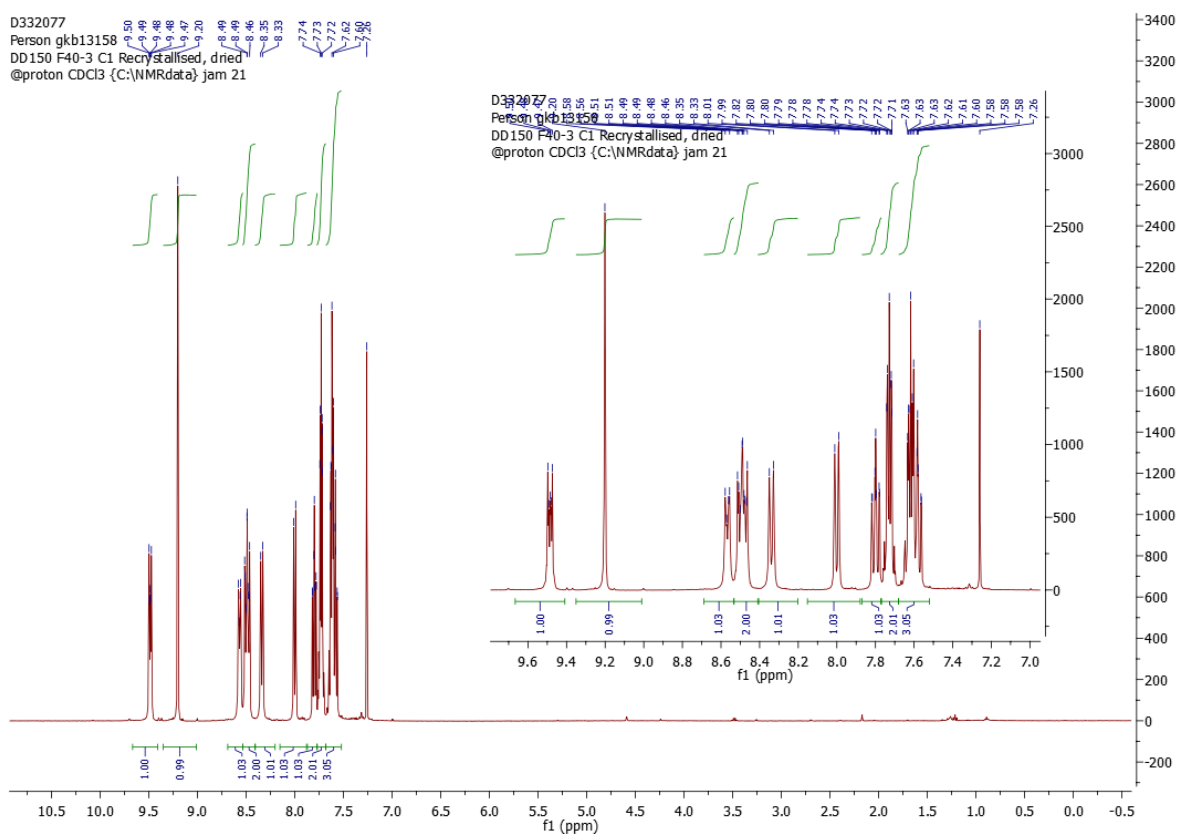

D332077  
Person gkb13158  
DD150 F40-3 C1 Recrystallised, dried  
@proton CDCl3 {C:\NMRdata} jam 21

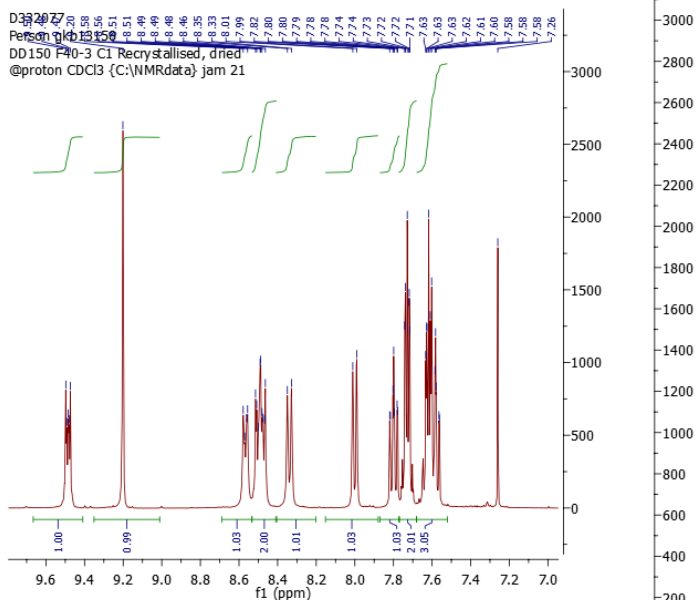

D332082  
Person gkb13158  
DD150 F40-3 C1 recrystallised, dried, 1024 scans  
13C @ CDCl3 {C:\NMRdata} jam 26

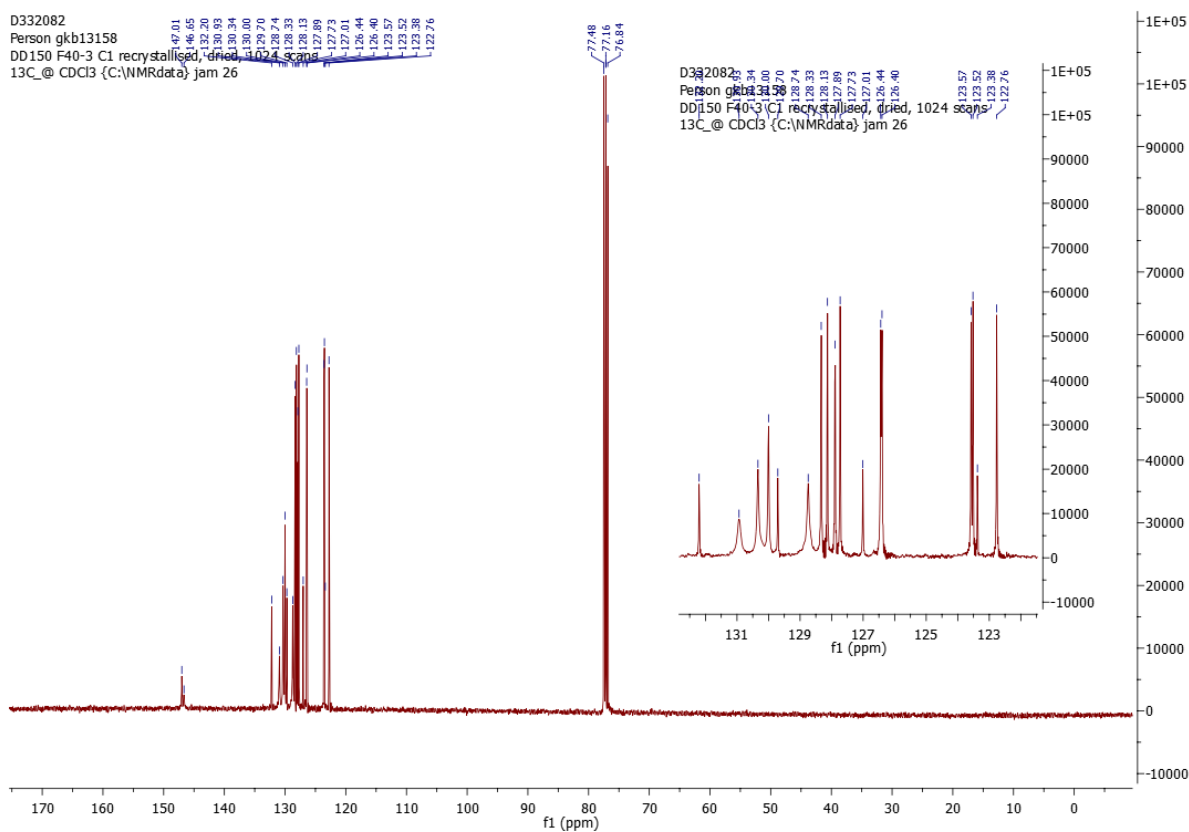

D332082  
Person gkb13158  
DD150 F40-3 C1 recrystallised, dried, 1024 scans  
13C @ CDCl3 {C:\NMRdata} jam 26

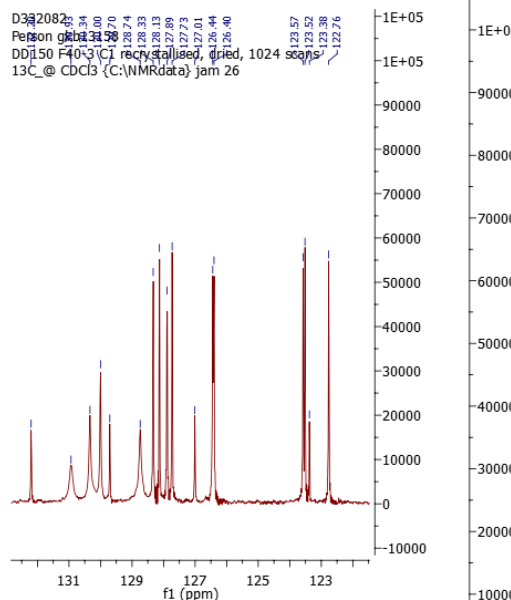

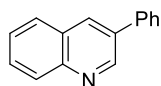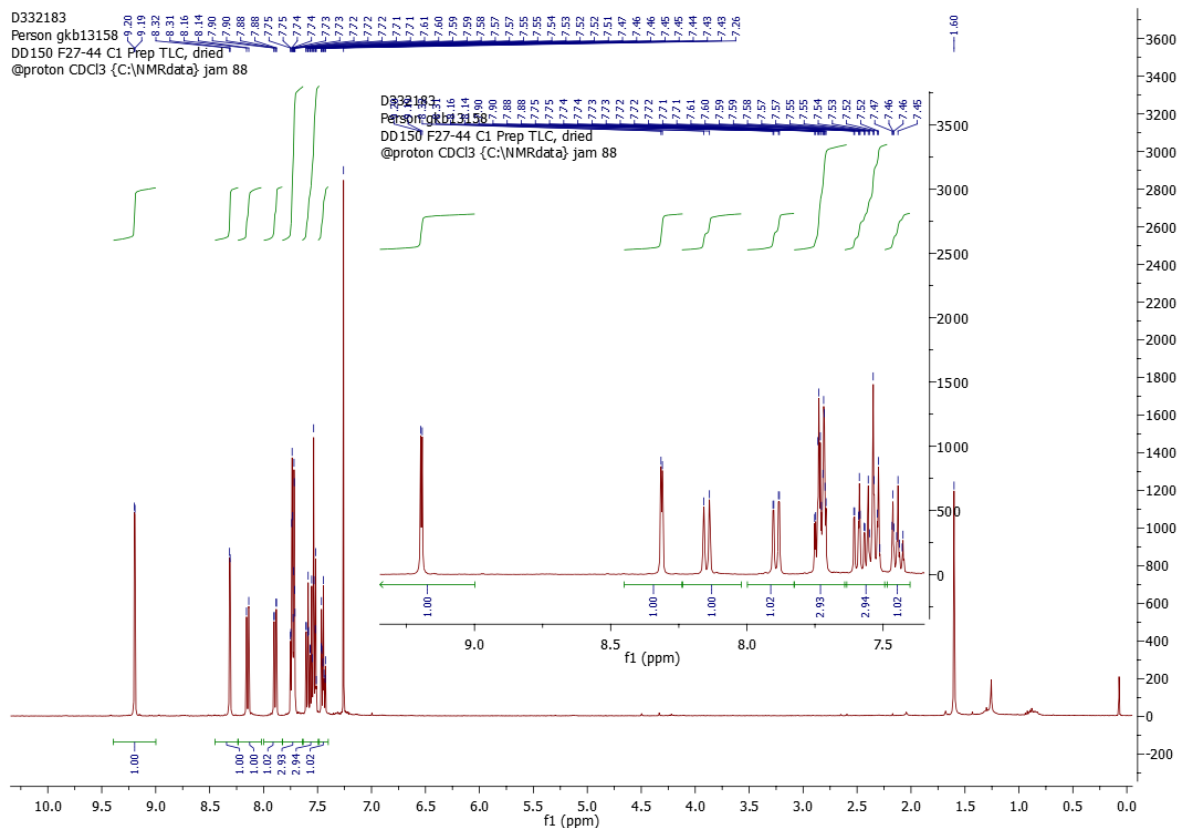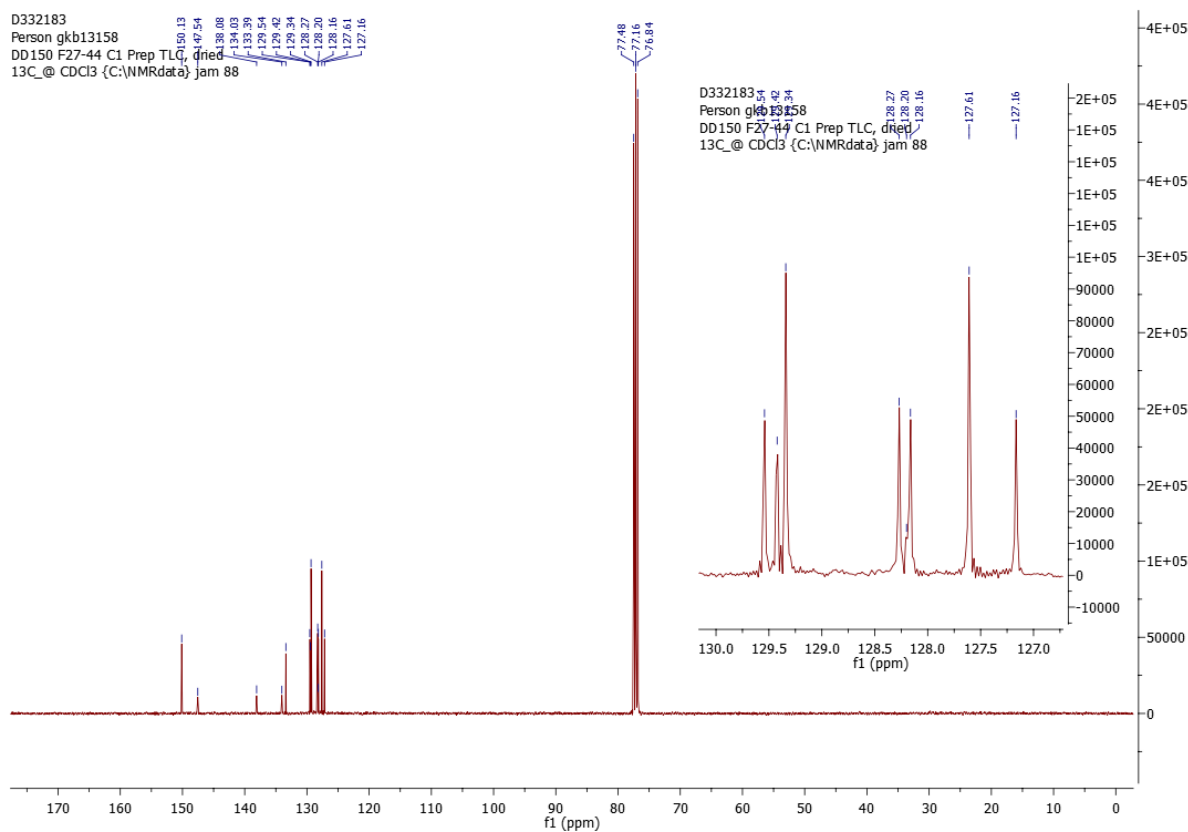

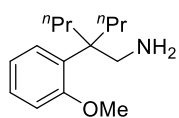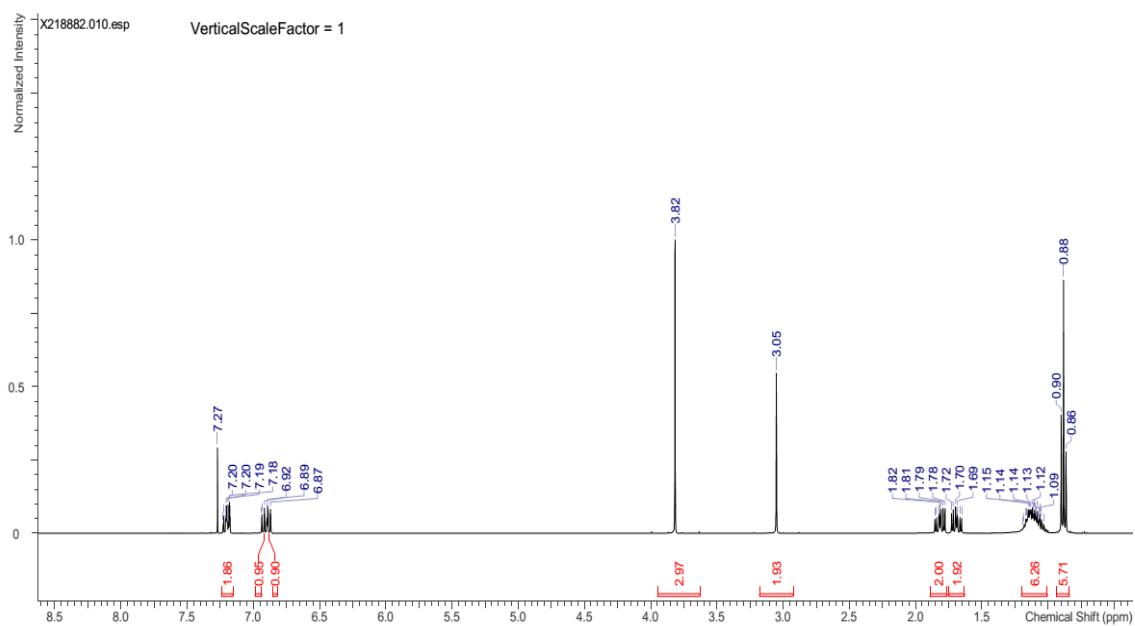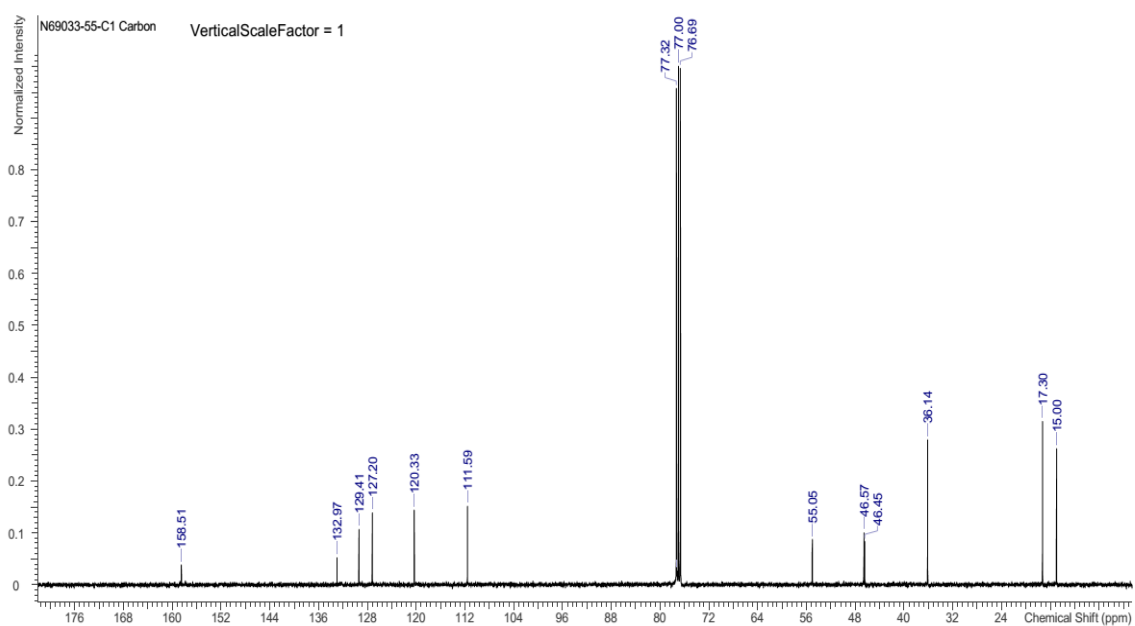

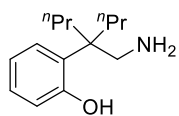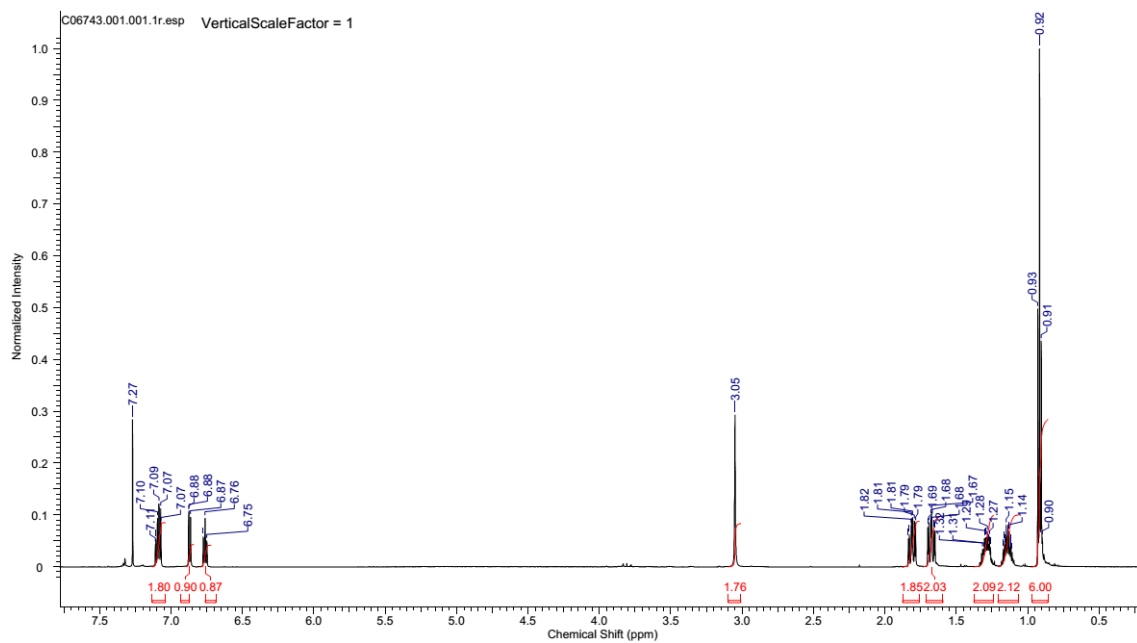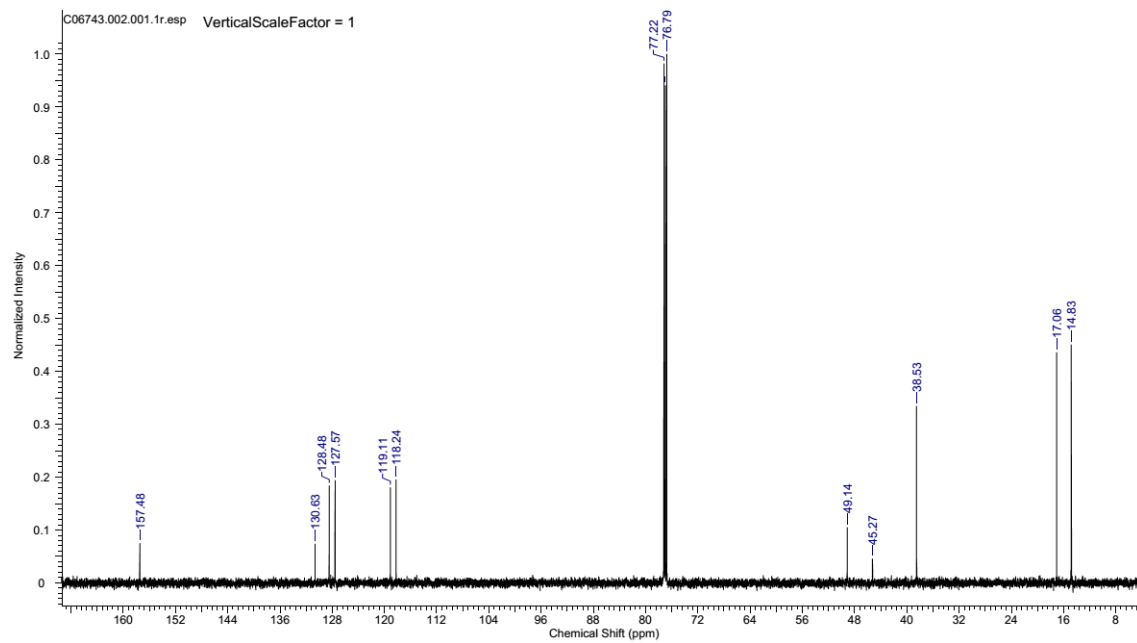



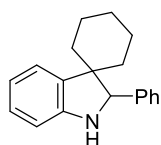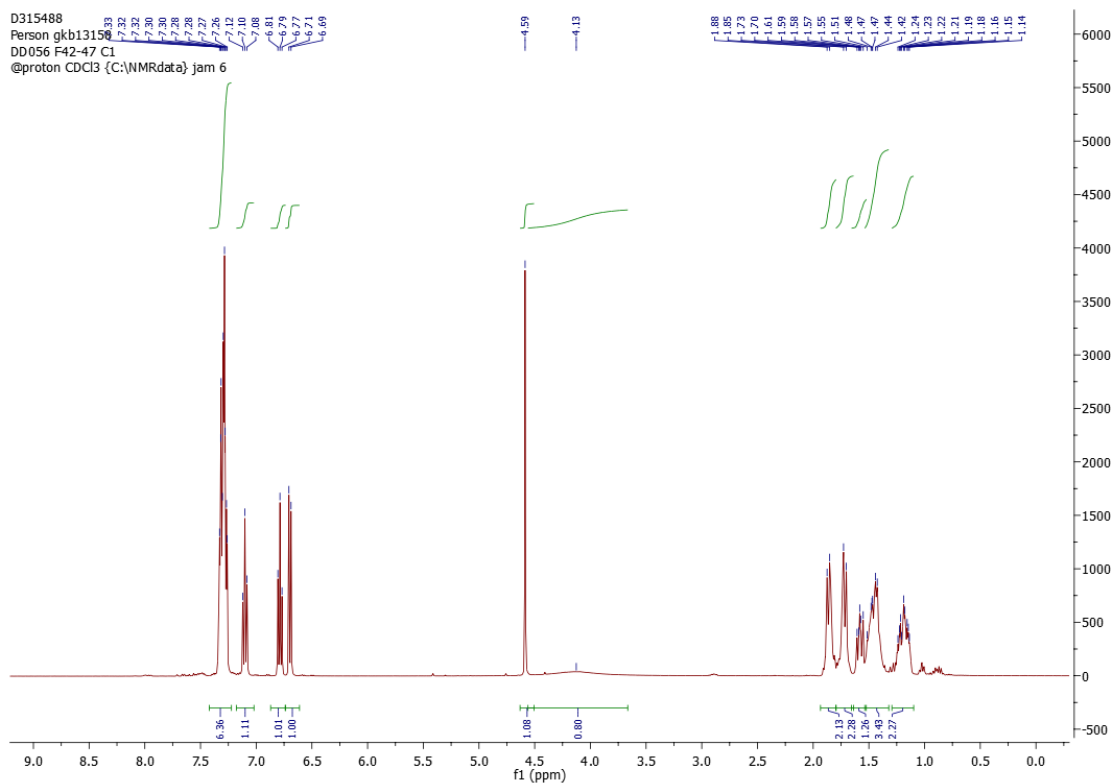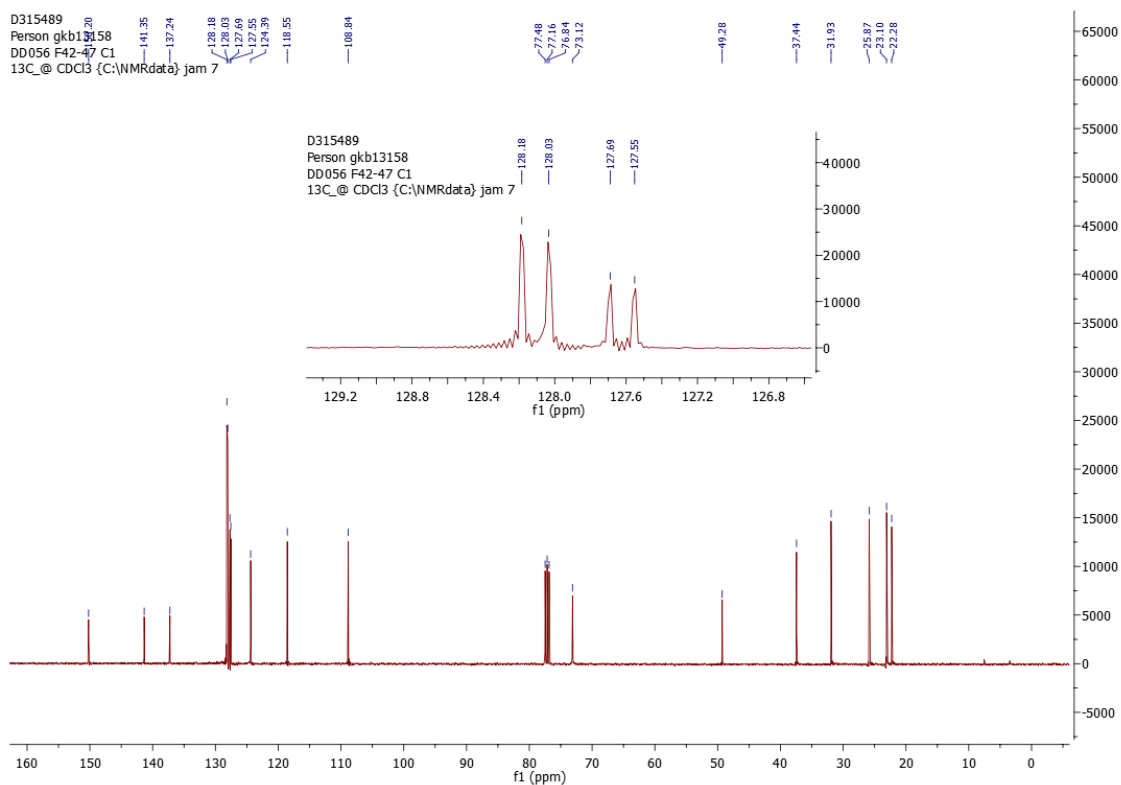

## References

- 1 A. D. Lackner, A. V Samant and F. D. Toste, *J. Am. Chem. Soc.*, 2013, **135**, 14090–14093.
- 2 S. Monfette, Z. R. Turner, S. P. Semproni and P. J. Chirik, *J. Am. Chem. Soc.*, 2012, **134**, 4561–4564.
- 3 B. K. Trivedi, A. Holmes, T. L. Stoeber, C. J. Blankley, W. H. Roark, J. A. Picard, M. K. Shaw, A. D. Essenburg, R. L. Stanfield and B. R. Krause, *J. Med. Chem.*, 1993, **36**, 3300–3307.
- 4 T. Kesharwani, A. K. Verma, D. Emrich, J. A. Ward and R. C. Larock, *Org. Lett.*, 2009, **11**, 2591–2593.
- 5 F. Huber, J. Roesslein and K. Gademann, *Org. Lett.*, 2019, **21**, 2560–2564.
- 6 M. A. Buil, M. Calbet, M. Castillo, J. Castro, C. Esteve, M. Ferrer, P. Forns, J. González, S. López, R. S. Roberts, S. Sevilla, B. Vidal, L. Vidal and P. Vilaseca, *Eur. J. Med. Chem.*, 2016, **113**, 102–133.
- 7 T. Yamamoto, T. Furusawa, A. Zhumagazin, T. Yamakawa, Y. Oe and T. Ohta, *Tetrahedron*, 2015, **71**, 19–26.
- 8 H. J. Kim, J. W. Seo, M. H. Lee, D. S. Shin, H. B. Kim, H. Cho, B. S. Lee and D. Y. Chi, *Tetrahedron*, 2012, **68**, 3942–3947.
- 9 M. Belletete, F. Brisse, G. Durocher, D. Gravel, A. Heroux and A. Popowycz, *J. Mol. Struct.*, 1993, **297**, 63–80.
- 10 O. Bakulina, A. Ivanov, V. Suslonov, D. Darin and M. Krasavin, *Beilstein J. Org. Chem.*, 2017, **13**, 1413–1424.
- 11 C. A. Simoneau and B. Ganem, *Tetrahedron*, 2005, **61**, 11374–11379.
- 12 C. Gervais, D. Anker and M. Chaire, *Bull. Soc. Chim. Fr.*, 1979, **2**, 241–248.
- 13 H. Leuchs, *Chem. Ber.*, 1932, **65**, 1586–1589.
- 14 L.-L. Cao, D.-S. Wang, G.-F. Jiang and Y.-G. Zhou, *Tetrahedron Lett.*, 2011, **52**, 2837–2839.
- 15 J. C. Ciula and A. Streitwieser, *J. Org. Chem.*, 1991, **56**, 1989–1993.
- 16 C. Cao, L. Wang, Z. Cai, L. Zhang, J. Guo, G. Pang and Y. Shi, *Eur. J. Org. Chem.*, 2011, **3**, 1570–1574.
- 17 M. Cariou, R. Carlier and J. Simonet, *Bull. Soc. Chim. Fr.*, 1986, **5**, 781–792.

- 18 Z. Duan, W. Li and A. Lei, *Org. Lett.*, 2016, **18**, 4012–4015.
- 19 J. T. R. Liddon, J. A. Rossi-Ashton, R. J. K. Taylor and W. P. Unsworth, *Org. Lett.*, 2018, **20**, 3349–3353.
- 20 G. Rodriguez, Y. Benito and F. Temprano, *Chem. Lett.*, 1985, **14**, 427–428.
- 21 A. KucEROVY, J. S. Hathaway, P. G. Manner and O. Repic, *Synth. Commun.*, 1992, **22**, 729–733.
- 22 O. Ogata, H. Nara, K. Matsumura and Y. Kayaki, *Org. Lett.*, 2019, **21**, 9954–9959.
- 23 C. Liu, L. Ding, G. Guo, W. Liu and F. L. Yang, *Org. Biomol. Chem.*, 2016, **14**, 2824–2827.
- 24 M. Peña-López, H. Neumann and M. Beller, *Chem. Eur. J.*, 2014, **20**, 1818–1824.
- 25 S. L. Mao, Y. Sun, G. A. Yu, C. Zhao, Z. J. Han, J. Yuan, X. Zhu, Q. Yang and S. H. Liu, *Org. Biomol. Chem.*, 2012, **10**, 9410–9417.
- 26 Y. D. Wu, J. R. Ma, W. M. Shu, K. L. Zheng and A. X. Wu, *Tetrahedron*, 2016, **72**, 4821–4826.
- 27 J. Mao, Z. Wang, X. Xu, G. Liu, R. Jiang, H. Guan, Z. Zheng and P. J. Walsh, *Angew. Chem. Int. Ed.*, 2019, **58**, 11033–11038.
- 28 M. E. Budén, V. A. Vaillard, S. E. Martin and R. A. Rossi, *J. Org. Chem.*, 2009, **74**, 4490–4498.
- 29 L. L. Cao, D. S. Wang, G. F. Jiang and Y. G. Zhou, *Tetrahedron Lett.*, 2011, **52**, 2837–2839.
- 30 J. Li, E. Tan, N. Keller, Y. H. Chen, P. M. Zehetmaier, A. C. Jakowetz, T. Bein and P. Knochel, *J. Am. Chem. Soc.*, 2019, **141**, 98–103.
- 31 P. K. Freeman and N. Ramnath, *J. Org. Chem.*, 1991, **56**, 3646–3651.
- 32 M. Lucarini, E. Marchesi, G. F. Pedulli and C. Chatgililoglu, *J. Org. Chem.*, 1998, **63**, 1687–1693.
- 33 W. B. Liu, D. P. Schuman, Y. F. Yang, A. A. Toutov, Y. Liang, H. F. T. Klare, N. Nesnas, M. Oestreich, D. G. Blackmond, S. C. Virgil, S. Banerjee, R. N. Zare, R. H. Grubbs, K. N. Houk and B. M. Stoltz, *J. Am. Chem. Soc.*, 2017, **139**, 6867–6879.
